# Supplementary material for: A Broad m6A Modification Landscape in Inflammatory Bowel Disease
Source: Front Cell Dev Biol. 2022 Jan 19;9:782636. doi: 10.3389/fcell.2021.782636 (PMC8809481; doi:10.3389/fcell.2021.782636)
Supplement: Supplementary file 1 [file Table2.xlsx]

## Sheet: m6AConsensusCluster
ID	ConsensusCluster
HSM9UBMQ	1
CSM5FZ2P	2
CSM5FZ34	1
CSM5FZ37	1
HSM6S4FR	1
CSMDRVXY	1
CSMDRVXN	1
MSM719MZ	2
PSM6XBZC	1
CSM5FZ24	1
CSM5FZ2I	2
CSM5FZ1O	1
HSM9JBU	1
CSMDRVY2	1
CSMDRVXP	1
MSM5LWL1	2
HSM5FZAR	1
ESM5GEY7	1
HSM7H3WN	2
MSM719MS	1
HSM9JTBY	2
HSM9UBMR	1
HSM6S4GL	1
CSMDRVXZ	2
HSM5FZAS	1
CSM5FZ1W	1
HSM5FZAT	2
CSM5FZ29	1
CSM5FZ2O	1
ESM5GEYL	2
CSM5FZ23	1
HSM5FZAM	1
HSM7H3WO	1
HSM7H3WX	2
CSM5FZ1U	2
CSM5FZ1M	1
CSM5FZ3A	1
CSM5FZ36	2
CSMDRVXG	1
CSM5FZ1Q	1
CSMDRVXL	1
PSM7J4EV	1
PSM6XBZD	2
ESM5GEYB	2
CSM5FZ2L	1
HSM6S4GJ	2
PSM6XBZP	1
CSM5FZ28	1
CSM5FZ22	1
CSM5FZ3B	1
MSM5LWL2	1
HSM7H3WJ	2
CSM5FZ3C	1
MSM719MD	1
CSM5FZ35	2
CSM5FZ1R	1
CSM5FZ1N	2
PSM7J4EU	2
HSM6S4FS	2
HSM5FZAQ	2
CSMDRVY3	1
CSMDRVXO	2
ESM5GEYK	2
HSM5FZAE	2
CSMDRVXX	1
HSM7H3WM	2
HSM5FZAU	2
CSM5FZ27	1
HSM6S4FQ	2
PSM6XBZO	2
CSM5FZ2E	1
PSM6XC11	2
HSM5FZBC	1
CSM5FZ2T	1
MSM719MT	2
PSM6XBZY	1
CSMDRVY6	1
HSM5FZAY	2
HSM5FZAH	2
HSM7H3WY	1
HSM7H3WK	1
HSM9UBMP	1
ESM5GEYI	1
HSM5FZBB	1
MSM719N1	2
ESM5GEYA	1
CSMDRVY7	1
CSMDRVXF	1
ESM6ZK8Z	2
HSM9UBMN	1
CSMDRVXJ	1
CSM5FZ2D	1
HSM5FZB1	2
CSMDRVXM	2
CSM5FZ1V	2
HSM7H3WL	1
HSM6S4GK	1
HSM7H3WH	1
CSM5FZ2N	1
CSMDRVY1	1
PSM7J4F3	1
HSM6S4FT	2
MSM5LWKW	1
HSM7H3WW	2
ESM5GEY9	1
PSM6XBZQ	2
HSM7H3WP	1
CSM5FZ2H	2
CSM5FZ2R	1
CSM5FZ1T	1
HSM5FZBF	2
CSMDRVXR	1
HSM9JBW	2
PSM6XBZZ	1
CSMDRVY5	1
CSMDTZ4X	1
CSM5FZ2S	1
HSM6S4FU	1
CSM5FZ2M	1
HSM9JTBZ	1
MSM5LWL5	1
CSMDRVXH	1
MSM5LWKX	1
ESM5GEY8	2
PSM6XBZR	1
HSM5FZAN	1
HSM9JBV	2
HSM5FZBG	1
PSM6XC15	1
CSM5FZ2Q	1
CSM5FZ1S	1
CSMDRVXK	1
CSM5FZ2G	2
HSM9UBMO	1
CSMDRVY4	1
CSMDTZ4Y	1
CSM5FZ2F	1
PSM7J4F4	2

## Sheet: m6ACluster_Heatmap
id	CSM5FZ1M	CSM5FZ1O	CSM5FZ1Q	CSM5FZ1R	CSM5FZ1S	CSM5FZ1T	CSM5FZ1W	CSM5FZ22	CSM5FZ23	CSM5FZ24	CSM5FZ27	CSM5FZ28	CSM5FZ29	CSM5FZ2D	CSM5FZ2E	CSM5FZ2F	CSM5FZ2L	CSM5FZ2M	CSM5FZ2N	CSM5FZ2O	CSM5FZ2Q	CSM5FZ2R	CSM5FZ2S	CSM5FZ2T	CSM5FZ34	CSM5FZ37	CSM5FZ3A	CSM5FZ3B	CSM5FZ3C	CSMDRVXF	CSMDRVXG	CSMDRVXH	CSMDRVXJ	CSMDRVXK	CSMDRVXL	CSMDRVXN	CSMDRVXP	CSMDRVXR	CSMDRVXX	CSMDRVXY	CSMDRVY1	CSMDRVY2	CSMDRVY3	CSMDRVY4	CSMDRVY5	CSMDRVY6	CSMDRVY7	CSMDTZ4X	CSMDTZ4Y
ALKBH1	450	546	515	541	409	826	449	606	472	480	618	522	525	481	510	590	579	521	342	574	373	490	632	608	323	455	379	349	346	358	346	425	323	516	443	516	522	432	484	474	336	389	456	650	507	358	416	416	619
EIF3C	663	640	495	944	641	577	472	375	426	377	493	619	530	537	499	590	374	505	378	394	290	464	623	586	229	420	491	263	723	378	482	437	779	709	463	530	366	525	605	510	467	342	316	490	399	400	557	429	695
HNRNPC	13273	25200	15686	24021	22682	26088	16380	13542	15235	18274	14413	17824	17195	19122	16396	18252	14134	24277	12830	15301	14796	15708	22964	19543	11288	16857	18171	10423	16570	10462	16167	15649	20182	15895	20800	22415	12807	15856	14573	14176	11230	15460	14077	23628	15048	19217	15025	14870	29243
IGF2BP2	2280	2094	2170	3159	2249	2291	2063	2770	2200	2942	2417	3008	2177	1968	2860	2652	2560	2104	1479	2804	2207	2135	3031	3067	1196	1720	1448	1417	1963	1522	1561	1233	2099	2301	2011	2190	1946	1675	1887	2095	1166	1782	1801	2986	1933	1802	2229	2268	2576
IGF2BP3	0	26	23	1	3	38	3	2	10	2	3	33	11	18	17	3	7	31	2	7	16	5	9	8	7	21	21	10	7	7	9	13	20	5	41	24	14	13	10	5	15	14	12	19	4	4	15	6	4
RBM15	513	597	594	444	531	910	442	568	360	467	556	528	454	672	432	483	631	611	364	688	392	594	535	535	372	314	385	295	307	367	219	309	335	482	379	472	602	304	316	556	330	531	392	420	620	376	504	364	545
RBM15B	2042	3849	2464	3756	3080	3747	3055	2559	3201	3103	2629	3259	2831	2837	3023	3515	1982	3114	2180	2628	2343	2764	3566	3999	1556	2815	2152	1662	2722	1792	2067	2658	2759	2825	2656	2843	2268	3134	2420	2288	1881	2207	2714	3258	2510	2499	2667	2983	3918
WTAP	2377	3530	2886	3551	3402	5441	3493	2606	2892	3368	2621	3522	3132	4342	3449	3663	2589	4621	2218	2814	2623	3388	4403	4349	1939	2909	2977	2263	2788	2112	2584	2727	3420	3091	3357	3476	2701	3241	2679	2565	2064	3209	3254	4754	2753	2512	3055	3121	4367
[truncated: 89 more columns]

## Sheet: Cluster_PCA
id	CSM5FZ34	CSM5FZ23	CSM5FZ3B	CSMDRVXX	PSM6XBZR	HSM7H3WP	CSM5FZ2N	CSMDRVXK	CSM5FZ2R	CSM5FZ22	CSMDRVY2	CSMDRVXJ	CSM5FZ2O	HSM5FZBB	CSMDRVY3	PSM7J4F3	CSMDRVXG	HSM9UBMQ	HSM6S4FU	CSM5FZ2Q	PSM6XBZP	HSM7H3WO	HSM9UBMO	CSMDRVY5	CSM5FZ1O	CSM5FZ1Q	CSM5FZ37	CSMDRVXL	CSMDRVXP	HSM5FZAN	CSM5FZ3A	MSM5LWKX	HSM5FZAS	PSM6XBZY	CSM5FZ3C	CSM5FZ1T	CSM5FZ28	HSM7H3WY	CSMDRVY1	CSM5FZ1S	HSM6S4GK	CSM5FZ27	CSMDRVXY	PSM6XC15	HSM9JTBZ	CSMDRVY7	HSM5FZAM	HSM9UBMN	PSM7J4EV
PCA Number	1	2	3	4	5	6	7	8	9	10	11	12	13	14	15	16	17	18	19	20	21	22	23	24	25	26	27	28	29	30	31	32	33	34	35	36	37	38	39	40	41	42	43	44	45	46	47	48	49
AC002480.5	3.22793	3.65025	4.05441	3.22793	3.22793	5.11908	3.22793	3.22793	3.22793	3.22793	3.22793	3.22793	3.70423	4.16311	3.87157	3.22793	3.91177	4.77165	3.22793	3.70299	3.22793	3.22793	4.16842	4.2617	5.30537	3.22793	4.77333	3.22793	4.1743	4.16981	3.74481	4.18675	4.44755	3.22793	3.69422	5.28482	3.22793	4.40917	3.73063	3.72736	3.79382	3.72874	4.22038	4.11778	4.30527	3.94612	3.90668	3.74266	3.667
AC007381.3	3.22793	3.22793	4.05441	3.22793	3.22793	4.10438	4.02825	3.22793	3.22793	3.22793	3.71496	3.22793	3.70423	3.22793	3.87157	3.22793	3.22793	4.08055	3.77233	3.22793	3.22793	3.91627	4.16842	3.65746	4.44596	3.22793	3.22793	3.22793	3.22793	3.22793	3.22793	3.22793	3.70064	3.69926	3.22793	4.02514	3.22793	3.68506	4.09015	3.72736	3.79382	3.72874	3.73144	3.22793	3.71863	3.22793	3.22793	3.22793	3.667
AC010149.4	3.74255	3.65025	4.46911	3.22793	3.22793	4.65791	3.69391	4.19663	3.69253	3.69914	3.22793	3.22793	3.70423	3.89488	4.13093	3.67816	3.22793	3.83514	4.29847	4.16575	4.09179	3.22793	3.96147	3.65746	3.85035	3.89843	4.48078	3.22793	4.46425	4.0014	3.74481	3.71391	4.26706	3.69926	4.14885	4.57672	3.22793	3.68506	3.93534	3.72736	4.57365	4.32666	3.22793	3.67811	3.71863	4.10316	3.90668	3.22793	3.22793
AC012065.7	4.24166	4.52416	5.53406	3.69935	3.7391	5.2974	4.14827	3.71905	4.42762	3.89142	3.71496	4.28003	3.70423	5.15539	4.95802	4.11787	4.63568	5.0407	4.94168	3.8968	4.43264	4.39909	4.98357	3.83318	4.90591	4.16799	5.05714	4.18178	5.30365	4.53823	4.86255	4.48012	5.27813	4.15858	4.77504	5.24582	3.91307	4.90906	4.43041	4.21257	4.92871	5.05314	4.33237	4.93469	5.02012	4.62407	4.62577	3.95211	3.22793
AC016683.5	3.74255	3.22793	3.70941	3.22793	3.22793	4.32692	3.69391	3.22793	3.22793	3.22793	3.9135	3.84421	3.70423	3.22793	3.22793	3.22793	3.22793	3.22793	3.22793	3.70299	3.7316	3.71694	3.65446	3.65746	3.22793	3.22793	3.71418	3.78525	3.903	4.0014	3.74481	3.71391	3.70064	3.22793	3.69422	3.69207	3.22793	3.22793	3.22793	3.9308	3.22793	3.72874	3.73144	3.67811	3.22793	3.22793	3.71007	3.22793	3.22793
AC016700.3	3.22793	3.65025	4.28571	3.22793	3.22793	4.10438	3.22793	3.22793	3.8822	3.69914	3.22793	3.22793	3.22793	3.70161	4.32537	3.22793	3.22793	3.96894	3.22793	3.22793	3.22793	3.71694	3.22793	3.65746	4.44596	3.89843	3.91241	3.78525	4.37725	3.22793	3.74481	3.22793	4.16122	3.22793	3.88455	4.64444	3.22793	3.68506	3.93534	3.72736	3.79382	3.72874	3.73144	3.67811	3.71863	3.94612	3.22793	3.22793	3.22793
AC023590.1	3.22793	3.65025	6.01751	3.22793	3.22793	5.57156	3.69391	3.22793	3.22793	3.22793	4.06377	3.84421	3.70423	3.70161	3.87157	3.67816	3.91177	5.38922	3.77233	3.8968	3.7316	4.06711	4.47317	3.83318	4.29022	4.04554	4.18726	4.32303	3.903	4.16981	3.74481	3.22793	4.0396	4.52308	4.43176	4.42648	3.22793	4.01328	4.6042	4.32375	4.02325	3.72874	4.33237	4.30961	4.06996	3.22793	3.90668	4.11038	4.50785
AC066593.1	4.98304	3.22793	4.54942	6.9661	6.26732	4.79136	7.15336	5.82415	7.28885	7.8776	5.52141	6.43107	6.98015	5.60059	7.38412	7.63371	5.55131	5.15569	6.88136	5.47382	4.60671	5.33913	6.66091	7.14923	4.1016	6.64788	4.29582	3.78525	7.36146	5.56131	7.43132	7.10043	7.21986	5.62184	3.88455	4.8803	6.0411	5.33173	4.43041	4.21257	5.86073	4.87979	4.6836	5.15323	5.60505	5.13779	4.47072	3.74266	3.667
AC073072.5	3.22793	3.22793	4.28571	3.89172	4.10441	4.44973	3.22793	3.22793	3.8822	3.22793	3.22793	3.66535	3.70423	4.60277	3.68492	3.22793	3.22793	4.08055	3.99339	3.22793	3.7316	3.22793	4.3333	3.22793	4.80744	3.22793	4.39274	3.22793	4.05108	4.0014	3.9551	3.71391	4.36161	3.22793	4.14885	4.64444	3.22793	4.01328	3.93534	3.9308	3.79382	3.93271	3.22793	3.86205	4.30527	4.10316	4.17937	3.95211	3.22793
AC073316.1	3.95196	4.74315	4.17811	3.69935	4.34855	3.91092	4.58175	4.49271	3.69253	3.69914	3.71496	3.97993	3.89854	4.44996	3.87157	4.21915	4.18638	4.95759	4.41842	4.04357	4.2207	4.39909	3.96147	3.83318	4.29022	3.70415	4.48078	4.01134	4.68812	4.16981	4.24597	3.22793	4.16122	4.52308	4.2534	4.42648	3.91307	4.40917	4.21883	4.08466	4.02325	4.32666	4.09152	4.00154	4.78639	4.34699	3.90668	4.11038	3.98273
AC079325.6	3.22793	4.24491	4.17811	3.69935	3.22793	3.7873	3.69391	3.22793	3.22793	3.22793	3.22793	3.66535	3.22793	4.44996	3.68492	4.72573	3.71372	6.10512	3.77233	4.27206	4.75631	4.48756	3.96147	4.07783	3.22793	3.22793	6.41617	4.01134	3.903	3.77809	4.11399	4.29525	3.89351	3.22793	5.03782	4.57672	3.22793	4.23388	3.73063	3.22793	3.79382	3.72874	4.09152	4.00154	4.06996	3.94612	3.71007	3.22793	3.667
AC079630.4	4.1102	4.32281	4.46911	3.22793	4.23506	4.50581	3.69391	3.91921	3.8822	3.22793	3.9135	3.84421	3.22793	3.89488	4.23359	3.67816	4.29485	3.96894	3.22793	3.8968	3.7316	4.06711	3.65446	3.83318	4.44596	4.04554	4.48078	3.22793	4.37725	3.77809	3.9551	3.91204	4.0396	4.26415	3.88455	3.88156	3.71465	3.68506	4.09015	4.08466	4.02325	4.21521	4.33237	3.67811	3.91863	3.94612	3.71007	3.22793	3.22793
AC079767.4	3.95196	4.24491	5.35097	3.22793	4.34855	8.37299	4.43101	3.22793	4.24982	4.52275	3.71496	4.56781	4.4564	5.53611	5.25728	4.39212	3.71372	5.71251	4.52521	3.22793	4.33271	4.48756	5.64326	4.2617	6.97823	4.04554	4.95157	3.22793	5.90942	3.77809	4.24597	4.835	5.59652	3.8916	4.43176	5.93838	4.39382	5.88232	5.21153	4.5958	4.76505	5.205	4.33237	5.80202	4.78639	5.33129	4.82335	4.35606	3.84652
AC091493.2	3.22793	3.82309	3.70941	3.22793	3.22793	4.01419	3.69391	3.22793	3.69253	3.22793	3.22793	3.22793	3.22793	3.22793	3.68492	3.22793	3.22793	4.08055	3.22793	3.22793	3.22793	3.22793	3.22793	3.22793	4.1016	3.22793	3.91241	3.22793	3.70743	3.22793	3.22793	3.22793	4.0396	3.22793	3.69422	3.69207	3.22793	3.87176	3.22793	3.22793	3.22793	3.22793	3.73144	4.00154	3.22793	3.73836	3.71007	3.22793	3.22793
AC092652.1	5.43343	5.29045	4.46911	3.69935	3.22793	4.10438	4.93855	5.21758	4.57798	4.95589	4.06377	4.36038	4.4564	4.60277	5.3312	4.93485	5.36726	4.41737	5.0096	4.91559	4.68404	4.64443	4.80604	4.54504	4.1016	4.74387	4.48078	4.44544	4.92992	5.51671	5.93217	5.28641	5.65797	4.79046	4.2534	4.76848	4.6382	4.5575	4.94624	5.04865	4.1961	4.67632	3.22793	3.22793	5.12195	5.64881	3.71007	3.22793	3.667
AC096559.1	3.22793	4.79173	4.62399	3.22793	3.22793	3.7873	3.22793	3.22793	4.02592	3.22793	3.9135	3.66535	3.70423	3.70161	4.01306	3.67816	4.06167	4.34427	4.16016	3.70299	3.7316	3.22793	4.3333	3.65746	4.58046	3.89843	3.91241	4.44544	4.05108	3.22793	3.22793	4.06199	3.89351	3.8916	4.65055	3.88156	3.71465	4.13119	3.73063	3.72736	4.33929	3.93271	3.93648	3.22793	3.22793	3.73836	3.90668	3.22793	3.84652
AC108463.2	4.35583	4.06385	4.3818	3.89172	3.22793	4.87236	3.69391	4.57436	4.34294	3.22793	4.39454	3.97993	3.89854	3.89488	4.23359	3.86212	4.06167	4.72008	3.99339	4.16575	4.75631	4.39909	3.65446	3.83318	4.80744	4.36971	5.10669	5.11292	3.903	4.63583	4.24597	4.06199	4.36161	4.59636	5.08414	4.57672	4.18817	4.13119	4.09015	4.42295	3.79382	4.74827	3.22793	4.6045	4.49169	4.34699	3.71007	3.95211	3.667
AC112721.2	3.22793	3.22793	3.22793	3.22793	3.22793	3.91092	3.22793	3.22793	3.22793	3.22793	3.22793	3.22793	3.22793	3.89488	3.22793	3.22793	3.22793	4.08055	3.22793	3.70299	3.7316	3.71694	3.82898	3.22793	3.85035	3.22793	3.91241	3.22793	3.70743	3.77809	3.22793	3.22793	3.70064	3.22793	3.22793	3.22793	3.22793	3.22793	3.22793	3.22793	3.22793	3.22793	3.22793	3.22793	3.22793	3.22793	3.90668	3.22793	3.667
AC145676.2	3.22793	4.06385	3.90576	3.22793	3.94715	3.91092	3.22793	3.22793	3.69253	3.69914	3.71496	3.66535	3.22793	4.16311	3.87157	3.22793	3.71372	3.96894	3.22793	4.04357	3.7316	3.22793	3.22793	3.22793	3.22793	3.70415	4.29582	4.01134	3.22793	3.77809	3.9551	3.22793	3.22793	4.03729	4.02876	3.69207	3.91307	4.01328	3.22793	3.22793	3.79382	3.93271	4.33237	4.00154	3.22793	3.73836	3.22793	3.22793	3.84652
ACAN	3.22793	4.24491	4.3818	3.22793	3.22793	3.62469	4.43101	4.07066	5.46582	4.03708	3.71496	3.66535	3.70423	3.89488	5.3312	4.46801	4.29485	5.58718	4.94168	4.16575	4.33271	4.19258	4.65231	4.48149	3.22793	4.86375	4.18726	4.01134	4.81535	3.22793	5.35414	4.06199	4.90801	4.26415	4.88724	4.02514	3.22793	4.01328	3.22793	3.9308	4.02325	3.72874	4.33237	3.86205	4.19583	4.10316	4.28711	3.22793	3.98273
ACMSD	3.22793	3.22793	4.28571	3.22793	3.22793	4.10438	3.22793	3.71905	3.22793	3.22793	3.22793	3.22793	3.22793	3.22793	3.22793	3.67816	3.22793	3.22793	3.22793	3.22793	3.7316	3.22793	3.22793	3.22793	4.1016	3.22793	4.83581	4.01134	3.22793	3.77809	3.22793	3.22793	3.22793	3.22793	3.22793	3.69207	3.91307	3.22793	3.22793	3.22793	3.22793	3.22793	3.22793	3.22793	3.22793	3.22793	3.22793	3.22793	3.22793
ADAM12	5.51525	6.32018	6.83057	5.71122	5.87891	7.88618	5.79736	5.46461	5.24756	5.7103	5.20305	5.44732	4.36989	6.44347	6.03895	4.93485	5.96281	6.85393	5.40307	6.22831	6.23367	6.14469	6.80732	5.22119	6.34735	5.25046	7.78355	6.29449	6.05558	6.43764	5.90243	5.36798	5.82714	6.32553	6.26365	6.57122	6.43668	6.69011	5.50901	6.38308	5.89745	6.98166	7.03396	7.73055	5.82238	5.81474	6.56857	5.39091	5.02978
ADAMTS12	7.56502	7.4454	7.16459	4.79073	4.84603	7.06955	6.28086	6.93273	6.3107	5.55853	7.00003	5.6685	5.51323	6.55832	6.66243	6.06835	7.02976	6.89561	6.83059	7.7765	6.88705	7.2464	6.13515	6.11576	6.24854	6.1298	8.34766	7.91068	6.50609	7.40874	6.63366	6.66657	6.63	7.09968	6.98467	6.15595	7.93341	6.57896	6.65251	7.25854	7.0913	7.69783	6.95529	6.2913	7.61165	7.13112	5.86858	5.20349	5.8212
ADAMTS2	8.4405	9.09861	8.44363	5.82147	6.53407	7.03054	7.24095	8.08566	7.92958	6.99967	7.69316	7.41768	6.76313	7.88548	8.21045	7.75564	8.0443	9.80498	7.54706	7.97794	9.02665	8.23371	7.72354	7.00559	6.82792	7.96684	9.48799	9.20236	8.35607	8.8877	8.50182	8.43389	8.33964	8.26692	8.52356	7.41631	9.00196	7.79625	7.8939	8.45907	8.37675	8.16203	6.87203	7.49283	7.80798	7.93508	8.80528	5.73473	5.36068
ADAMTS4	5.15164	7.34101	5.75428	5.19069	6.80545	5.99351	4.34612	6.32431	5.68179	5.05489	4.56378	4.8429	4.91961	10.3897	6.14124	5.77753	4.89368	9.49556	5.58371	6.05802	5.72354	7.81278	6.35778	4.48149	5.49608	5.40682	8.43093	6.58017	6.34658	6.18378	5.10523	5.40692	6.36859	5.35058	6.58222	5.84074	5.74702	7.33473	6.68537	5.85932	5.47599	6.19816	7.12058	6.45345	5.73347	5.68366	5.99629	5.39091	6.74311
AF165138.7	3.74255	3.22793	3.22793	3.22793	3.7391	3.7873	3.69391	3.22793	3.22793	3.22793	3.22793	3.22793	3.70423	3.22793	3.68492	3.22793	3.22793	4.08055	3.99339	3.70299	3.22793	3.22793	4.25471	3.65746	3.22793	3.22793	4.06245	3.22793	3.903	3.22793	4.24597	3.22793	3.70064	3.69926	3.69422	3.88156	3.71465	3.22793	3.22793	3.22793	3.22793	3.72874	3.22793	3.22793	3.22793	3.73836	3.71007	3.22793	3.22793
AFF2	4.54998	5.12164	7.24725	4.03744	4.62598	6.55625	4.88626	4.40392	4.50556	4.35817	5.29027	5.06499	4.67904	5.46834	5.00547	4.83499	5.05559	6.12299	4.86968	5.43853	4.82424	4.78144	5.17415	4.48149	5.81096	4.60968	4.95157	5.04754	4.37725	5.21164	4.98996	4.48012	4.26706	5.55905	5.21357	5.32268	4.83724	4.5575	5.9845	5.37772	5.07258	5.29696	4.22038	5.02683	5.38579	3.94612	4.38331	5.04218	4.79844
AICDA	4.71349	3.65025	7.29659	3.69935	3.7391	6.79919	3.69391	4.85057	3.22793	3.69914	4.63905	3.22793	3.70423	4.91117	4.4857	3.67816	4.18638	5.68836	3.99339	4.91559	3.7316	4.30169	5.20901	3.65746	6.58124	3.22793	3.71418	4.55436	3.903	5.09135	3.9551	4.06199	4.16122	4.72945	3.22793	5.03038	3.91307	4.5575	4.94624	5.10126	4.67351	4.59934	3.73144	4.46789	4.40296	3.22793	3.90668	3.22793	3.667
AIM2	6.21303	6.69494	7.97854	5.35092	5.87891	9.3213	6.22403	5.38737	5.70999	5.49264	5.91654	6.3084	6.50688	8.18264	7.33398	5.91943	5.65062	7.85447	6.29221	5.96434	6.57149	5.75667	6.61265	5.3832	8.69789	7.17839	7.79758	6.37153	6.66447	6.18378	6.33738	6.84001	7.27784	5.94745	6.81685	7.17305	7.14895	7.67402	7.29666	7.13541	7.4468	7.96515	6.73723	8.00857	6.83642	6.51181	6.80678	6.30565	5.8212
AL122127.1	3.74255	4.52416	4.17811	3.69935	3.22793	4.94814	4.34612	3.71905	4.14561	3.22793	3.71496	3.97993	4.53599	4.73638	4.13093	3.67816	3.91177	4.66602	3.99339	4.53275	4.09179	3.91627	4.25471	3.83318	4.1016	4.74387	4.89511	3.78525	4.1743	4.53823	4.11399	4.70645	4.0396	4.35846	4.8325	4.93244	5.86138	6.69011	4.21883	4.7444	4.46333	4.4261	3.73144	3.67811	4.30527	4.10316	4.55112	3.22793	3.22793
AL122127.2	4.63482	4.32281	5.13767	4.03744	4.34855	6.08916	4.71363	4.07066	4.76989	3.22793	4.77563	4.56781	4.6099	5.50266	4.74655	4.30972	3.91177	5.26102	4.86968	5.1151	4.75631	4.19258	4.80604	3.96656	4.90591	4.97248	5.10669	3.22793	4.61861	4.30943	4.36058	4.95071	4.26706	5.10198	5.08414	5.70799	6.39993	7.00096	4.88547	4.42295	4.67351	5.5392	4.22038	4.46789	4.40296	5.08439	4.93839	4.35606	3.22793
AL122127.25	3.22793	4.24491	4.54942	3.69935	3.94715	4.32692	3.22793	3.71905	3.22793	3.22793	3.22793	3.84421	4.36989	3.70161	4.23359	3.22793	3.22793	4.34427	3.99339	3.70299	4.09179	3.22793	4.25471	3.65746	4.29022	3.22793	3.22793	3.22793	3.70743	3.22793	3.9551	3.22793	4.52664	4.03729	4.02876	4.02514	3.22793	4.74695	4.09015	3.22793	4.02325	4.8159	3.22793	4.11778	3.71863	4.23364	3.71007	3.22793	3.22793
AL122127.4	4.92123	4.74315	5.66428	3.69935	3.94715	6.42925	4.98866	4.30616	4.42762	4.26388	4.89756	4.79301	4.27471	5.43311	5.1377	4.11787	4.29485	5.71251	4.94168	5.66791	4.94926	4.78144	4.70593	3.83318	6.0271	4.97248	5.20026	4.44544	4.61861	4.80824	5.35414	5.10577	4.73349	5.27297	5.85039	5.59153	6.43668	7.29156	4.52097	4.9937	5.37302	5.34059	4.22038	4.30961	5.07209	4.90868	5.18563	3.22793	3.84652
AL512428.1	3.74255	3.95433	4.54942	3.69935	3.94715	5.18136	3.69391	3.91921	3.69253	3.22793	3.9135	4.0931	4.27471	4.60277	4.40884	3.22793	3.71372	4.95759	3.77233	3.8968	3.9367	3.91627	4.16842	3.96656	4.80744	3.89843	5.15435	3.78525	4.05108	3.22793	4.24597	4.06199	4.36161	4.35846	4.14885	4.64444	3.71465	4.01328	3.73063	3.72736	4.33929	4.59934	3.73144	4.53844	4.78639	4.10316	4.17937	3.95211	4.28386
ALG1L13P	3.74255	4.4615	4.54942	3.89172	4.10441	5.05354	4.50915	4.07066	3.69253	4.15834	3.9135	4.19176	4.04567	5.01478	4.32537	4.53857	4.06167	5.19178	4.52521	3.8968	4.09179	4.06711	3.96147	3.83318	4.90591	4.16799	5.68406	4.65299	4.37725	4.30943	4.64059	4.18675	4.26706	4.15858	4.98969	4.93244	4.48193	4.48605	4.52097	4.08466	3.79382	4.51637	3.73144	4.30961	3.71863	4.10316	3.90668	4.11038	4.50785
ALPK2	4.24166	4.83833	6.46458	4.79073	4.91091	8.91739	5.32982	4.30616	4.50556	4.72907	4.4827	4.93673	5.11949	5.90885	5.1377	4.11787	4.56057	6.35175	4.52521	4.27206	5.75567	4.64443	5.78377	4.60494	7.15078	4.4562	5.68406	4.65299	4.92992	4.43048	4.92796	4.39212	5.06006	4.59636	6.01732	5.70799	4.77471	6.2914	5.30371	6.34281	6.06766	6.26488	6.04056	6.49866	5.70249	5.45946	6.02048	5.152	4.1953
ALPL	7.24698	7.19682	7.1857	6.36229	6.836	7.79632	6.22403	6.64507	7.18537	7.02235	7.45629	5.92334	6.10839	8.25669	6.56374	6.70554	7.42272	9.5123	7.29675	7.42622	6.6572	8.05047	6.13515	5.82041	6.93688	6.79004	9.84227	7.31971	6.84701	7.48868	6.84825	6.61969	6.71679	7.33511	8.21842	7.98384	6.85731	7.51813	7.74703	7.18142	6.30288	7.64114	7.35281	6.91913	7.38417	7.01637	7.33841	6.14016	6.10989
ANK1	5.20313	6.11315	5.60075	4.90386	5.24075	6.49994	4.77411	4.78761	5.16572	4.44387	5.00807	5.6685	4.864	6.05168	5.8817	4.83499	5.48074	6.74406	5.40307	5.24614	5.16611	5.25457	5.78377	4.48149	6.06654	4.86375	7.12434	5.54172	5.68664	5.64628	4.98996	5.10577	6.45559	5.10198	6.71124	6.57122	5.15599	5.64929	5.1628	5.33559	5.52461	6.02881	6.16387	6.95184	5.70249	5.71764	5.92109	5.04218	5.14999
ANKLE1	4.54998	4.69238	4.93628	3.22793	3.22793	5.18136	4.02825	3.91921	4.42762	4.26388	4.06377	3.97993	3.70423	4.26915	4.74655	4.00161	4.39169	5.44887	4.16016	4.36703	3.9367	4.06711	5.1383	4.17486	4.80744	4.74387	4.77333	4.65299	4.61861	4.30943	4.71954	4.56106	4.73349	4.52308	5.03782	5.24582	4.48193	4.68737	4.43041	4.42295	4.33929	4.59934	4.52295	4.39201	4.40296	4.44807	4.76127	3.74266	3.22793
ANXA10	3.74255	4.15938	3.70941	3.89172	3.7391	3.22793	4.25275	3.22793	3.8822	4.44387	3.22793	4.19176	4.27471	3.70161	4.01306	4.53857	3.71372	3.96894	3.22793	3.8968	4.33271	3.71694	4.07201	3.83318	4.44596	3.89843	9.38509	5.44703	4.68812	4.16981	4.24597	4.06199	4.0396	3.22793	7.0935	4.70819	3.91307	4.13119	3.73063	3.22793	4.02325	3.72874	4.33237	4.21905	3.71863	3.94612	3.90668	4.45787	4.0963
AOX1	6.58708	7.6514	5.72494	4.72971	5.3781	7.10753	6.50357	6.03647	6.64662	5.7938	5.83502	5.94432	6.34972	6.81686	6.71588	5.91943	6.08421	6.53524	5.95117	5.88965	6.94256	5.89852	5.73854	4.9525	5.90154	6.50648	6.79995	4.82715	6.0785	5.94113	6.48341	6.30011	7.06373	6.66703	6.61193	6.07297	5.33059	5.83387	6.35787	6.28014	6.45654	6.42868	7.15615	4.93469	6.10647	6.30846	6.46779	5.92327	5.14999
AP000695.4	3.22793	3.82309	3.22793	3.22793	3.22793	3.22793	3.88413	3.22793	3.22793	3.22793	3.22793	3.22793	3.22793	3.22793	3.22793	3.86212	3.71372	4.17787	3.22793	3.22793	3.22793	3.91627	3.22793	3.65746	3.22793	3.70415	4.29582	3.22793	3.22793	3.22793	4.36058	3.91204	3.70064	3.22793	3.69422	3.88156	3.22793	3.22793	3.93534	3.22793	3.22793	3.22793	3.73144	3.67811	3.22793	3.73836	3.22793	3.22793	3.667
AP001046.5	5.04184	5.25843	5.18329	4.4444	4.62598	5.87285	4.43101	4.49271	4.76989	4.52275	4.18877	4.56781	4.67904	5.32133	5.1377	4.88598	4.70591	5.80502	4.62197	4.74043	5.06245	4.90374	4.59591	3.96656	5.16055	5.02337	6.45244	4.97848	5.08352	4.53823	4.64059	4.48012	4.90801	4.95631	5.8248	5.52927	5.33059	5.83387	4.8214	4.7444	5.57151	5.42367	5.00665	5.6189	4.90901	4.62407	5.31351	4.35606	3.84652
APOH	5.15164	4.39465	4.98983	5.99531	5.28818	4.79136	5.79736	4.91031	5.68179	6.10631	5.68731	5.71853	4.4564	4.44996	6.45765	6.22102	4.47966	5.11852	5.30248	4.36703	4.52334	4.19258	5.17415	5.52728	4.80744	4.4562	4.39274	5.86508	5.85704	4.72535	6.31522	5.58601	5.39307	4.95631	3.88455	4.34188	4.18817	5.29529	4.88547	4.51301	5.07258	4.4261	3.93648	4.83484	5.30374	5.08439	5.5367	3.74266	4.79844
AQP8	5.34616	11.4434	8.87455	12.1506	11.4671	5.35172	14.8509	5.38737	14.7096	15.9573	5.20305	14.3757	15.8494	5.46834	12.9289	14.615	6.52006	9.69346	14.1694	5.32655	14.6609	5.41851	14.6356	15.7471	5.55396	15.2826	5.0055	5.82863	13.9179	5.56131	13.7983	14.8792	12.3518	5.55905	9.7725	12.0603	5.1083	15.0998	5.50901	5.10126	14.844	4.99807	14.2237	12.6419	7.81502	11.3508	11.0822	14.7774	12.0665
AQP9	4.63482	5.49484	5.81113	4.5966	5.54127	4.94814	4.02825	4.78761	5.53118	4.95589	4.06377	3.97993	3.89854	9.29239	4.62401	6.00648	4.06167	10.4363	4.71074	4.27206	4.60671	6.71214	5.45827	3.96656	4.99682	4.53578	10.9972	4.82715	3.903	4.0014	4.55545	3.71391	3.89351	4.15858	6.53646	4.24884	4.70854	5.33173	5.50901	4.42295	4.84975	4.74827	7.25786	6.91913	4.64901	5.2382	4.28711	7.36861	8.71405
AQPEP	4.45763	3.65025	4.05441	3.69935	4.44976	4.10438	3.69391	4.07066	3.8822	3.69914	4.06377	4.19176	3.22793	4.6716	3.68492	3.67816	4.29485	4.41737	3.99339	4.45333	4.2207	4.06711	3.96147	3.83318	3.22793	4.27454	4.29582	3.78525	3.22793	4.16981	4.24597	3.91204	4.16122	3.69926	3.88455	4.02514	4.48193	4.01328	3.93534	4.08466	4.02325	4.32666	3.73144	4.00154	4.57328	4.10316	4.05552	3.22793	3.667
ATP1A4	3.74255	3.82309	4.69373	3.22793	3.22793	4.60959	3.69391	3.71905	3.69253	3.69914	3.22793	3.66535	3.70423	3.89488	4.23359	3.86212	4.29485	4.08055	3.22793	3.8968	3.9367	4.06711	3.22793	4.07783	4.69975	4.04554	3.91241	4.18178	3.70743	4.53823	4.36058	3.71391	3.89351	4.15858	4.02876	4.24884	4.06324	3.87176	4.43041	3.72736	4.02325	4.08697	4.09152	3.86205	4.30527	3.73836	3.71007	3.22793	3.667
BACH2	6.69258	6.57661	8.26235	5.59118	6.09946	9.29041	6.43872	6.45784	6.29252	5.49264	6.06638	5.79027	5.61146	7.58914	7.06326	5.56185	6.4322	7.89081	6.07439	7.02014	6.55371	6.55276	6.97852	5.65725	8.83855	5.94515	6.89479	6.46808	6.6494	6.36618	5.90243	5.96366	7.14911	6.85613	6.24471	8.13222	6.5246	6.39392	6.92404	7.08787	7.32029	6.7241	5.84708	6.12736	7.30624	6.12148	6.41457	5.39091	4.94256
BANK1	5.73431	7.30445	9.60762	5.76746	7.29688	11.7175	7.64896	5.82415	5.56269	7.05571	5.94267	7.82434	6.49026	9.81737	9.04343	6.04804	5.96281	9.68611	6.43589	6.81079	7.08492	6.31441	9.17877	6.02415	11.1484	6.47304	8.17589	6.44456	8.1904	5.76445	7.35816	7.76077	9.27713	7.17244	8.26551	9.87662	6.80233	8.6569	8.26152	8.68272	8.70437	8.67031	7.65541	9.12293	8.6416	8.35138	7.6049	6.89788	6.0529
BASP1	7.99178	9.5593	9.51302	6.65295	7.91786	9.76975	8.32272	7.61391	8.55553	8.69289	8.09175	7.88396	8.39183	9.20039	8.97982	8.7129	8.2917	10.0878	8.84126	8.23051	8.35596	8.72021	8.92324	8.16072	9.69049	9.14369	10.5736	8.98977	8.84675	8.84937	8.80224	8.6226	9.37301	9.06657	9.68522	9.39445	8.76181	9.47959	9.07446	8.7336	9.18171	9.16482	8.37527	8.58014	8.51776	8.23124	8.69557	6.83795	6.78981
BATF	5.89315	6.72859	7.26719	4.5966	5.42083	7.95007	5.82344	6.13152	5.91672	5.7938	6.49161	6.25949	6.47344	8.18769	6.66243	5.98523	5.68216	8.04619	5.98302	6.5809	6.21102	7.29731	7.19801	5.77576	8.33586	7.00322	8.12121	6.93995	6.12325	6.50565	5.56285	6.3199	6.23695	6.46554	7.62199	7.60981	7.72861	7.35164	6.68537	6.34281	6.40716	7.19975	6.78359	7.23454	6.32235	5.64881	6.56857	5.70061	6.18241
BCAT1	7.67993	8.77813	7.97854	6.01845	7.41247	8.33523	7.75833	7.70028	8.21808	7.99076	7.1832	7.01294	7.03816	8.45002	8.25595	8.57694	7.24992	8.11801	7.60837	7.84897	8.61151	7.5107	7.61822	7.77019	8.22056	7.59559	8.3188	6.5364	8.24114	7.18001	7.86737	7.7891	7.69408	7.80198	7.8432	7.76088	6.62334	7.46475	7.58342	7.31119	8.06656	8.08527	7.94632	8.00857	7.31621	7.77229	9.13577	6.80701	6.86802
BCL2A1	7.152	8.37598	8.581	5.42415	7.02003	9.21795	6.68199	6.86608	6.44826	6.68075	7.38343	6.75744	6.47344	9.53767	7.28201	6.96283	7.21898	9.9085	7.16671	7.75608	6.75364	8.60406	7.77888	6.50081	8.87167	7.40651	10.3591	8.50183	6.61879	8.61563	6.7695	6.43312	7.37839	7.70046	8.47632	8.0705	8.3263	8.07055	8.05238	8.16598	7.80877	8.21287	7.66365	8.38345	7.4216	6.67272	6.83393	7.55634	8.37312
BEST4	9.14668	9.30639	9.45357	11.841	11.1078	7.66535	11.9782	8.83972	11.027	9.95094	9.3473	10.4878	10.8412	8.43734	10.4095	12.2552	9.99169	9.01209	10.9836	9.23333	12.3474	9.63806	11.0665	12.5654	7.45838	9.51068	7.25236	8.84621	9.25964	8.22111	10.057	10.6703	8.22676	8.39362	10.0189	11.0377	9.03195	11.316	8.21201	8.83027	9.97604	9.13878	9.95539	9.87118	8.63367	10.1886	8.9104	10.8615	10.1085
BFSP2	4.45763	4.39465	4.82136	3.89172	3.7391	5.65869	4.50915	4.07066	4.34294	3.89142	4.18877	4.28003	4.6099	5.11027	4.90861	4.60463	3.71372	4.91378	4.62197	4.36703	4.09179	4.30169	4.98357	4.41367	5.16055	4.4562	5.0055	4.44544	4.98331	4.16981	3.9551	4.29525	4.73349	4.15858	4.77504	4.82574	4.6382	5.17933	5.1628	4.08466	4.33929	5.205	4.43227	4.53844	4.78639	4.34699	5.2297	3.22793	3.98273
BGN	9.78746	10.3992	9.03673	6.75162	7.85248	10.0917	8.04394	9.14932	9.0557	8.0414	8.74922	8.12309	7.16847	9.09138	9.28625	8.0744	9.72723	10.8104	8.57616	9.14464	9.4965	9.24451	9.18082	7.89226	9.1888	8.72939	10.3436	10.5971	9.13113	10.2768	9.29367	9.03361	9.89689	9.48141	10.6026	10.1543	9.58071	9.90916	9.31474	8.78274	8.91111	9.15041	9.35023	8.7031	9.17724	8.95811	9.00244	6.69308	7.43483
BHLHE22	5.70019	7.28956	5.75428	4.35866	4.23506	6.78985	4.77411	5.98638	5.79123	5.35009	4.63905	5.58979	4.4564	6.42628	6.32574	4.78166	5.58524	6.06868	5.13507	6.01197	7.04748	5.29754	5.61835	4.71558	5.55396	5.16449	6.53924	4.97848	5.98443	6.80389	6.35919	5.8305	7.09635	5.84731	6.66953	6.17594	6.32339	6.56444	5.58294	5.83007	6.00207	6.59271	5.84708	4.93469	5.46299	5.96267	5.92109	4.98337	5.18761
BLK	4.92123	6.06067	8.581	5.65254	5.81777	10.0573	6.78957	4.72099	5.32447	5.97081	5.48561	6.71001	5.96998	8.23242	8.04405	5.64683	4.83442	7.38615	5.85095	5.66791	5.96164	5.06642	7.12282	4.9525	9.28617	6.47304	6.78587	5.63011	7.35224	4.88556	5.84097	5.88532	7.4304	6.08521	6.65535	8.50695	5.74702	7.13419	7.14027	7.1927	7.47081	7.53843	5.39273	7.42476	7.12505	6.67272	6.50219	4.55024	4.28386
BNC1	4.35583	4.15938	3.90576	3.69935	3.7391	4.32692	3.22793	4.07066	3.69253	3.22793	3.71496	3.66535	3.70423	4.36387	4.23359	3.22793	4.06167	4.26497	4.16016	3.8968	4.2207	4.06711	3.65446	3.65746	3.85035	3.70415	3.22793	4.18178	3.903	4.0014	3.9551	3.91204	4.0396	4.03729	3.69422	3.88156	3.22793	3.68506	3.73063	4.21257	4.02325	4.32666	4.33237	3.67811	4.06996	4.34699	4.17937	3.22793	3.22793
C12orf42	4.24166	4.32281	4.28571	3.69935	3.22793	5.83633	4.02825	3.91921	3.69253	4.26388	3.22793	4.28003	4.16814	4.60277	4.55714	3.22793	4.06167	4.77165	3.22793	3.8968	4.2207	3.71694	4.40576	3.22793	5.60944	3.89843	3.71418	4.44544	4.1743	3.77809	4.24597	4.18675	4.8527	4.44419	4.14885	4.76848	3.91307	4.01328	4.21883	4.42295	4.92871	4.51637	3.22793	4.6045	4.40296	3.73836	3.71007	4.24186	3.84652
C15orf54	3.22793	3.82309	3.70941	3.22793	3.22793	3.22793	3.88413	3.22793	3.22793	3.22793	3.22793	3.66535	3.70423	3.70161	3.87157	3.67816	3.22793	3.65887	4.16016	3.8968	3.22793	4.06711	3.22793	3.22793	3.22793	3.70415	4.06245	4.01134	3.22793	3.22793	3.9551	3.71391	3.22793	4.03729	3.88455	3.88156	3.71465	3.22793	3.22793	3.22793	3.22793	3.22793	3.22793	3.22793	3.71863	3.22793	3.71007	3.22793	3.84652
C19orf59	3.22793	4.06385	3.70941	3.22793	4.10441	3.22793	3.22793	3.22793	3.22793	4.03708	3.71496	3.66535	3.70423	5.66211	3.22793	4.30972	3.22793	6.46746	3.99339	3.22793	4.09179	4.39909	4.3333	3.83318	3.22793	4.04554	7.71868	4.55436	3.70743	3.77809	3.22793	3.71391	3.70064	4.15858	4.71453	3.69207	4.39382	3.87176	3.73063	3.22793	3.22793	3.72874	4.60629	3.67811	3.71863	3.22793	3.22793	4.11038	3.84652
C1QTNF1-AS1	4.35583	4.06385	4.3818	5.00712	4.23506	5.05354	6.59559	5.46461	5.98686	5.99433	4.63905	5.3538	4.91961	5.24106	4.40884	5.19284	4.39169	3.96894	4.71074	5.1151	5.00717	4.71503	6.15228	7.10587	4.69975	4.4562	4.56175	4.01134	5.26257	5.26774	5.30809	6.53792	5.15188	5.82109	4.02876	4.34188	4.29682	4.68737	4.52097	4.81189	5.47599	4.59934	4.82376	4.11778	4.64901	4.90868	5.13997	5.51565	4.79844
C21orf88	6.00818	7.86699	7.19615	9.63997	7.95985	6.49994	10.4142	6.42097	9.61488	10.6735	6.6089	10.9846	5.9455	6.40887	11.5567	10.0796	6.21714	9.82254	5.66561	6.26783	9.90168	6.05141	10.7781	9.42617	5.81096	5.84264	5.36899	5.79118	11.339	5.51671	11.6122	9.70627	10.4533	6.23037	6.28235	6.49423	5.91517	10.8994	6.45671	6.42224	4.84975	6.30765	6.63968	10.6576	6.73556	11.4476	11.3219	8.27122	8.36548
C3	9.20676	11.8975	12.1722	8.26269	10.5854	15.181	10.8014	8.73963	10.8399	10.2923	8.36158	10.0382	8.3238	13.4165	12.5417	9.97795	9.45476	14.1616	10.2845	9.55574	11.1843	9.23153	12.2229	9.27262	13.7717	8.90094	12.6258	8.7259	11.5527	9.15887	11.0575	10.947	12.8474	10.6972	13.305	13.5354	10.5733	12.5136	10.8837	11.7224	12.2938	12.6465	10.7093	12.0723	11.7754	11.4677	11.7565	9.16253	9.11777
C4orf50	3.22793	3.82309	4.05441	3.69935	3.22793	3.91092	3.22793	3.22793	3.69253	3.22793	3.71496	4.0931	3.70423	3.22793	3.22793	3.67816	3.71372	3.65887	3.77233	3.22793	3.22793	3.22793	3.22793	3.22793	3.22793	4.16799	4.39274	4.01134	3.22793	3.22793	3.22793	3.22793	3.70064	3.69926	3.88455	3.88156	4.18817	3.87176	3.22793	4.32375	3.79382	3.93271	4.33237	4.39201	3.22793	3.94612	3.71007	3.22793	3.667
C5AR1	6.79077	9.11764	6.83057	6.48253	7.85989	6.41712	6.92535	6.64507	7.68996	7.74122	5.8899	6.54391	6.76313	7.39258	7.92512	7.8566	6.65017	9.09888	7.93772	6.24821	7.89212	7.13879	7.01599	7.15774	6.31518	7.08251	9.51367	7.00535	8.02648	6.95678	7.83696	7.87089	7.41327	6.66703	8.30211	7.15327	6.57483	7.82676	7.1981	6.53358	7.22458	6.28643	7.62195	7.42476	6.891	7.13112	9.45309	7.68895	7.67656
C9orf139	3.22793	4.4615	4.28571	3.69935	3.22793	4.9843	3.22793	3.22793	3.69253	3.69914	3.22793	3.66535	3.22793	3.70161	4.62401	4.11787	3.91177	4.77165	3.99339	3.22793	4.52334	3.91627	4.40576	3.96656	4.29022	4.4562	5.24457	4.01134	4.1743	4.0014	4.24597	4.06199	4.26706	3.69926	4.98969	4.02514	4.77471	4.80355	4.33065	4.51301	4.92871	4.32666	3.73144	4.46789	3.91863	4.34699	4.69559	3.74266	3.667
CA7	9.40699	9.80472	9.58998	13.6407	12.6773	8.04674	12.1319	9.30248	10.8825	10.2026	9.33771	10.8594	10.6134	9.11013	11.1108	12.7903	10.27	11.0624	10.7468	9.79597	12.5591	10.5466	11.8596	12.7949	7.89478	9.53293	6.69833	8.86824	9.64192	8.01325	10.6252	10.5328	9.08824	8.73182	10.221	11.408	9.0758	12.4554	8.73239	9.29892	10.1695	9.80121	10.8609	10.7728	9.20159	10.7625	10.1228	11.55	10.8983
CAMK1G	4.71349	3.95433	4.05441	3.22793	3.7391	5.15061	4.14827	4.57436	3.22793	3.69914	4.18877	3.66535	3.22793	4.36387	4.01306	3.67816	4.29485	4.5491	3.22793	4.27206	3.9367	4.56891	4.40576	3.22793	4.1016	3.89843	4.89511	4.44544	4.61861	4.95813	3.9551	3.22793	4.52664	4.84839	3.88455	4.42648	4.39382	4.32568	4.33065	4.42295	4.1961	4.4261	3.22793	5.19267	4.40296	3.94612	3.71007	3.74266	4.1953
CAMP	3.22793	3.95433	4.82136	4.26433	4.84603	6.84496	4.25275	3.22793	4.02592	4.72907	3.71496	4.50329	4.7441	5.01478	4.4857	4.00161	3.71372	4.77165	3.22793	3.8968	4.09179	3.71694	4.40576	4.07783	5.94467	4.04554	4.95157	3.22793	4.37725	3.22793	4.24597	4.77254	3.70064	3.69926	4.34682	4.42648	3.91307	4.23388	4.21883	3.72736	4.46333	3.93271	3.93648	4.21905	4.19583	3.73836	4.47072	3.95211	4.43876
CCDC147-AS1	3.95196	3.82309	3.22793	3.69935	3.22793	4.18521	3.69391	3.22793	3.8822	4.35817	3.9135	3.84421	3.70423	4.6716	4.40884	4.00161	3.22793	4.66602	4.29847	4.36703	3.7316	4.30169	3.96147	3.22793	3.85035	3.89843	4.77333	4.44544	4.28151	4.30943	3.74481	3.22793	4.26706	3.8916	4.50994	4.02514	4.29682	4.48605	3.93534	3.9308	4.1961	3.93271	3.93648	4.21905	4.19583	4.34699	3.71007	3.95211	3.98273
CCL17	4.35583	3.82309	5.42729	4.03744	4.5416	5.63744	3.69391	3.71905	3.69253	4.15834	3.22793	3.84421	3.70423	6.69347	4.74655	4.30972	3.71372	6.08702	3.99339	4.27206	3.7316	4.90374	5.40029	3.65746	6.49801	4.04554	4.48078	3.22793	4.1743	5.02655	4.92796	3.71391	4.66882	3.69926	4.98969	6.19566	3.91307	4.48605	4.6042	4.5958	3.79382	4.59934	3.93648	4.11778	3.71863	3.94612	4.38331	3.74266	3.84652
CCL18	7.01016	9.17731	11.2939	6.93052	8.96562	9.13436	6.24323	6.82454	7.36828	8.12204	7.50861	8.18038	7.54905	8.49964	9.23723	7.99848	5.98796	9.77201	4.79296	7.13031	8.88241	8.52535	8.94273	7.76464	11.2036	8.97372	10.5908	8.30263	11.5707	8.42606	8.23683	7.45948	10.108	9.16624	11.1351	11.0904	9.95865	9.52116	8.12552	8.40213	6.13029	10.6046	9.16847	9.79106	8.08335	8.73943	11.9199	6.53173	6.01357
CCL22	7.24698	7.71954	7.81921	5.23266	6.4172	9.9553	6.38804	5.60673	6.49657	6.49783	5.71817	6.89091	5.07249	8.42883	6.63493	6.4989	6.83904	8.68296	5.88518	6.83707	5.96164	9.14275	9.19511	6.5921	9.3065	5.57919	9.38509	8.00923	7.26644	8.2541	7.68303	6.53792	8.25102	8.19416	9.29859	10.2455	6.54154	7.93153	7.60918	8.2598	7.52915	6.30765	6.46052	6.98382	7.06708	7.37808	7.19964	6.37099	6.8126
CCL3	5.51525	9.25957	6.29855	4.66517	6.836	5.42915	6.56558	5.26217	6.87011	7.13064	5.37195	7.07958	5.76073	6.84289	8.95246	5.89678	5.7431	8.3667	8.45365	6.41561	6.29949	6.60248	6.21879	6.06152	6.63413	6.67747	9.83719	6.62263	7.03212	8.1667	6.73674	5.58601	5.65797	6.12825	7.68577	6.64423	7.32457	8.07564	6.25154	6.46034	6.92699	6.5754	6.8285	7.08552	5.34541	5.81474	6.13544	7.5377	7.93079
CCL3L1	4.24166	5.74106	4.17811	3.69935	4.62598	4.01419	4.93855	3.22793	3.8822	3.89142	3.22793	4.50329	4.04567	3.70161	5.7309	4.21915	3.71372	4.34427	4.62197	3.70299	3.22793	4.19258	3.65446	3.65746	3.85035	3.70415	3.91241	3.22793	3.903	4.16981	3.74481	3.22793	4.0396	3.69926	4.02876	4.02514	4.6382	5.05162	3.93534	3.22793	4.46333	3.22793	3.22793	3.22793	3.91863	4.23364	3.90668	4.6351	4.89645
CCL4	6.72607	8.5449	7.34429	5.42415	7.20653	7.115	6.42203	6.66092	6.89424	7.17175	6.76123	7.27896	6.90727	7.8917	8.38029	6.65332	5.5165	8.82643	7.78688	7.40011	6.49898	7.8676	7.08809	6.54066	7.62337	7.43263	9.61006	7.39468	7.606	8.53205	6.75322	6.45114	6.90079	6.9773	7.71324	7.19256	8.56251	9.13956	7.51238	7.17006	7.4468	7.67381	7.45143	7.9015	6.69004	7.37808	7.09158	8.15999	8.69285
CCR12P	3.74255	3.22793	3.22793	4.03744	3.22793	4.83257	3.22793	3.22793	3.22793	3.22793	3.71496	3.84421	3.22793	3.22793	3.68492	3.22793	3.22793	4.34427	3.77233	3.70299	4.09179	3.22793	3.82898	3.22793	5.08139	3.22793	3.91241	3.22793	3.22793	3.22793	3.22793	3.91204	3.70064	3.22793	3.22793	3.88156	3.71465	3.22793	3.73063	3.72736	4.33929	3.22793	3.22793	3.67811	3.22793	3.94612	3.22793	3.22793	3.22793
CCR4	5.43343	7.43868	7.66271	4.03744	5.90849	8.66442	6.45521	4.85057	5.53118	5.1465	4.95409	6.19149	5.25075	7.14399	6.59265	5.3736	4.89368	7.55763	6.01415	5.60629	6.11657	5.72643	7.19801	5.3832	8.39023	5.16449	7.00813	5.58665	6.41971	5.90757	5.60092	5.51725	6.88841	5.76708	7.40322	7.24019	6.78825	7.1728	6.61886	6.96161	7.58521	7.30793	6.21029	6.61261	5.57093	6.62109	7.34783	4.78728	5.67606
CCR7	5.62924	7.31918	8.8484	4.4444	6.17388	10.7785	6.06009	5.07349	6.32865	6.57694	5.24741	6.82574	5.11949	8.81916	7.86176	5.23109	5.71297	9.67871	5.40307	4.6755	5.72354	7.16097	8.84255	5.82041	10.0354	5.70265	8.80492	6.98928	7.40671	5.90757	7.07446	7.70238	8.65886	7.13132	8.17961	9.79636	7.01057	8.07055	6.54908	7.99673	8.14316	7.1069	6.11585	7.65999	6.69004	7.11882	6.84732	5.39091	5.70135
CCR8	4.1102	5.32169	5.13767	4.72971	5.50233	4.91086	4.77411	3.22793	4.02592	3.89142	3.71496	4.28003	4.36989	4.16311	4.13093	4.00161	3.71372	5.68836	3.22793	3.8968	4.43264	3.91627	4.40576	3.83318	4.44596	3.89843	4.70721	4.01134	4.1743	4.43048	3.9551	4.29525	4.16122	4.15858	5.50582	5.24582	5.37077	4.68737	4.21883	4.87565	4.84975	5.92187	5.26131	5.98501	4.71981	4.10316	5.42985	4.24186	4.84847
CD19	4.35583	5.82821	8.63936	5.14727	5.33392	10.5777	6.33547	4.07066	4.98397	6.1694	4.4827	6.38631	5.20849	8.50775	7.70643	4.60463	5.05559	8.67108	5.54081	4.91559	5.51274	5.2101	8.03664	5.11307	9.79199	6.84314	7.09046	4.90523	7.57465	5.47056	6.66886	6.79859	8.21201	5.31236	7.50109	9.55505	5.62212	8.17379	7.37891	7.27983	7.56305	7.42781	5.39273	7.49283	7.29619	6.77067	6.17889	5.04218	4.69126
CD22	6.45316	6.58889	9.96928	5.76746	6.75837	11.6509	6.9487	5.5726	6.03171	6.54583	6.36367	7.17841	6.17274	9.37445	8.7417	6.02742	6.711	9.51894	6.16011	6.71476	6.5357	6.96049	9.08762	6.3592	10.9339	7.09349	8.09307	6.62263	8.54961	6.63257	7.4211	7.50293	9.11491	7.75549	8.13972	10.3103	6.74514	8.38519	8.8805	8.16026	8.28511	8.0608	6.25522	8.37547	8.72983	7.89248	6.7791	6.62363	6.25134
CD300E	4.54998	6.14707	5.31105	3.89172	5.03094	4.44973	3.88413	4.49271	5.07818	4.79008	4.18877	4.0931	4.53599	9.75747	4.13093	5.56185	4.29485	8.75507	4.79296	5.01942	5.96164	6.46579	5.45827	3.96656	4.29022	4.74387	10.1457	4.01134	4.54429	5.15294	5.7766	5.44473	5.46442	4.15858	6.18628	5.46395	4.77471	6.18079	4.94624	4.81189	5.26119	4.87979	7.32185	6.46868	4.49169	4.77526	4.69559	5.51565	6.333
CD37	8.69251	9.09435	10.5814	7.41477	7.76041	12.1371	8.73719	8.48521	8.03051	8.20828	8.71631	8.76821	8.53508	10.406	10.18	8.51295	8.03842	10.0528	8.69847	8.96091	8.89994	9.07457	9.55615	8.06017	11.5842	9.25006	10.5017	9.65922	9.83084	8.63078	8.92642	8.99162	10.2398	9.15606	9.42002	10.7948	9.31896	9.73059	9.77268	9.63363	9.76708	9.8268	8.44379	9.73299	9.66159	9.41921	8.96327	7.4606	7.36745
CD70	4.45763	4.58323	4.46911	4.52331	4.34855	4.74861	3.88413	4.40392	4.70955	4.44387	4.18877	4.8429	3.89854	5.19895	5.25728	3.86212	4.29485	4.99985	3.99339	4.16575	4.60671	4.06711	4.16842	4.60494	4.44596	4.53578	5.36899	4.82715	4.68812	4.0014	3.74481	4.29525	4.44755	4.52308	5.17189	4.57672	5.00704	5.09566	4.33065	4.81189	4.02325	4.99807	4.6836	4.98164	4.49169	3.73836	4.47072	4.24186	4.36448
CD72	5.83182	7.15633	8.33008	5.05563	6.12471	9.77092	5.47143	5.73521	5.76469	5.55853	5.65573	5.8804	6.29318	7.28318	6.2729	5.56185	5.36726	8.23969	5.66561	6.01197	6.57149	5.97708	7.38825	5.47153	9.39267	7.20897	8.12677	7.22697	7.11092	7.0198	6.24657	6.39638	7.08556	6.93006	7.20435	9.33886	8.14597	7.56235	7.58342	7.08787	6.78039	7.15408	5.47351	7.32036	6.96914	6.63851	7.41206	5.152	4.98696
CD79A	8.10988	10.1479	11.3392	8.19467	9.2024	12.3573	9.46925	6.86608	9.08203	8.65005	8.02158	9.47942	9.09877	10.3929	10.9242	9.83995	7.86319	10.5757	9.91036	8.18545	9.06134	8.20208	10.1175	8.36142	12.0988	11.0487	11.6361	8.32192	11.0358	9.29182	10.596	10.8429	11.1884	9.39539	11.9588	12.2152	9.48857	11.9831	10.3417	9.48627	10.5216	11.5123	9.09735	10.057	10.0113	10.2767	10.928	7.37913	7.0984
CD79B	6.23664	7.17266	9.6574	6.06359	6.80545	11.0181	7.06006	5.82415	6.36387	6.8929	6.34441	7.35768	6.95627	8.73536	8.97982	7.05601	6.41396	8.98835	7.41597	6.82399	7.47121	6.35381	8.61548	6.5921	10.7021	7.98458	8.52657	6.15587	8.50879	6.78585	7.7661	8.03949	8.84876	7.01173	8.51968	10.2709	7.32457	8.9394	8.09549	7.93111	8.40812	8.29905	6.99517	7.96669	7.98693	7.64112	7.96401	5.98076	5.59719
CD80	5.15164	6.07838	6.68936	4.90386	5.6159	7.02261	5.36669	4.91031	5.32447	5.55853	4.89756	5.47707	5.61146	7.82182	5.67667	5.07058	5.36726	7.76217	6.24086	5.63745	6.09192	6.77119	6.18593	4.81623	6.10489	5.78836	7.68133	7.02125	5.5598	7.47753	5.52367	5.55207	5.92928	5.65217	6.48917	6.30842	6.22146	7.13419	5.87303	6.4028	6.5275	6.94183	6.09121	7.49283	5.76376	5.64881	6.06761	6.00864	6.07216
CD83	7.69682	9.88095	9.16142	6.9063	8.15919	10.7138	7.79729	6.78175	7.88235	8.13245	7.08307	8.17606	7.23934	9.46046	9.16995	7.78004	7.19798	9.81716	7.56779	7.70018	7.39392	8.59192	9.41333	7.63068	10.3276	7.19885	9.41719	8.09399	8.77973	8.71372	8.38068	7.76791	8.7192	8.18418	8.90277	9.76264	8.24665	9.11261	8.4724	8.83744	8.5777	8.12711	7.36298	8.49438	7.87688	8.11257	8.4474	7.50927	8.07363
CEACAM4	4.85603	4.69238	5.22731	3.22793	3.7391	4.55898	4.50915	4.07066	4.42762	3.69914	4.4827	4.56781	4.27471	5.15539	4.4857	4.78166	4.06167	5.8272	4.41842	4.6755	4.09179	4.56891	3.22793	4.17486	4.90591	4.80537	7.84562	6.21298	4.28151	4.72535	4.36058	4.39212	4.6001	4.95631	5.71733	5.39522	5.05872	4.68737	4.43041	4.42295	4.76505	4.99807	4.6836	4.83484	4.30527	4.70224	5.04332	3.74266	4.36448
CETP	5.15164	4.79173	6.41139	4.03744	4.23506	7.98302	4.93855	5.17136	5.16572	5.4233	5.10938	4.98101	4.91961	6.00569	5.99582	5.1534	4.83442	5.26102	4.62197	5.01942	4.8884	5.75667	5.84893	5.44274	7.01841	6.23388	5.6202	5.82863	5.30365	5.3731	4.64059	5.10577	5.74519	5.55905	5.77212	5.86581	4.70854	5.53124	5.34744	4.67261	5.37302	5.34059	5.30661	5.59058	5.85077	4.5398	5.31351	4.35606	4.28386
CHI3L1	3.95196	7.49812	7.59343	7.18301	8.77515	7.58707	5.43744	4.49271	6.27409	5.99433	4.06377	4.19176	5.57952	7.76877	5.46749	6.48398	5.00399	12.6961	7.33357	4.80181	8.29893	5.89852	7.35217	5.41331	8.4204	6.45602	13.1319	5.67221	7.13266	5.02655	6.63366	7.07758	6.02436	5.4238	12.2145	9.32573	7.13792	8.9968	6.39824	5.73836	7.38494	8.56992	12.4398	11.226	6.32235	8.16122	8.36191	7.29274	8.12883
CHI3L2	7.26977	6.09587	9.11283	5.05563	6.07374	10.2326	6.66795	6.49378	4.88179	5.4233	6.15797	5.92334	4.91961	8.85772	6.71588	5.53227	6.25877	12.1542	6.01415	6.18765	5.81775	6.39213	6.99738	5.3832	9.87597	5.84264	8.15427	7.08311	5.95988	7.18001	6.12409	5.96366	7.16969	6.28824	7.27067	8.78177	8.33114	6.99018	6.99111	6.88011	6.24768	7.33885	5.62163	7.3533	6.50939	6.01765	5.84154	5.152	5.1112
CHN1	6.91196	8.4446	7.69246	5.65254	6.14951	8.67201	6.62498	6.90644	7.09476	6.92939	7.09454	6.5574	6.66316	7.45275	7.90812	6.86313	6.86599	7.37884	6.50257	7.21272	8.25052	7.12757	6.87012	6.04296	7.39889	6.23388	8.12121	7.29382	7.25658	7.23409	6.92287	6.90646	7.576	7.43974	8.23271	7.45715	7.52394	7.50308	7.60918	7.37191	7.68091	7.99774	7.25786	7.07567	7.36508	7.47765	7.80932	5.83225	5.99347
CHRDL2	4.1102	6.93466	4.93628	4.35866	4.23506	6.08916	3.69391	4.91031	5.89253	4.52275	4.56378	4.28003	3.70423	6.61998	5.75722	3.67816	4.63568	8.11801	4.16016	4.04357	5.35098	3.91627	5.80584	3.96656	5.857	4.80537	7.50438	3.22793	5.26257	4.43048	5.93217	5.28641	6.48895	5.79435	6.28235	7.00661	5.00704	6.2914	5.21153	4.32375	5.07258	4.94039	6.49821	4.6045	4.90901	5.78314	4.62577	4.6351	5.75057
CHRNA6	4.24166	3.65025	3.70941	3.22793	3.7391	3.91092	4.02825	3.71905	3.22793	3.89142	3.71496	3.66535	3.70423	4.04126	3.68492	3.86212	3.22793	3.65887	3.77233	3.70299	3.9367	3.71694	3.65446	3.65746	3.22793	3.70415	4.18726	4.32303	3.22793	3.77809	4.24597	3.22793	4.0396	4.52308	4.50994	4.76848	4.29682	4.48605	4.09015	4.08466	4.1961	4.21521	3.22793	4.00154	3.22793	3.73836	4.28711	3.74266	3.667
CHST4	3.74255	3.22793	4.28571	3.69935	3.7391	6.14944	3.69391	3.22793	3.22793	3.69914	3.22793	3.66535	3.89854	3.70161	4.01306	3.67816	3.22793	3.65887	3.22793	3.70299	3.22793	3.22793	4.80604	3.22793	4.69975	3.22793	3.22793	3.22793	3.903	3.22793	3.22793	3.71391	4.16122	3.22793	4.58258	4.24884	3.22793	4.01328	3.93534	3.9308	3.22793	3.93271	3.22793	4.46789	3.91863	4.34699	3.71007	3.22793	3.98273
CLDN16	3.22793	4.15938	3.70941	4.35866	4.10441	4.87236	3.88413	3.91921	3.8822	3.22793	3.9135	3.66535	3.89854	4.36387	3.68492	3.22793	3.71372	4.17787	3.22793	3.22793	4.09179	3.22793	3.22793	3.22793	4.1016	4.04554	3.91241	3.22793	3.903	3.22793	4.11399	3.22793	3.22793	3.69926	4.02876	3.22793	3.22793	4.01328	4.09015	4.42295	4.1961	4.08697	4.09152	4.46789	4.19583	3.73836	3.90668	4.35606	4.0963
CLDN8	8.27627	3.65025	8.66955	11.5465	7.91786	7.56	12.6833	8.77978	12.2845	13.3644	9.70686	11.8477	7.92503	5.98211	12.9711	11.8185	7.4496	9.86746	6.24086	9.09681	9.66795	6.07532	12.3381	11.7489	6.68511	5.99367	4.18726	4.32303	13.1177	5.56131	12.4435	10.0259	13.0564	7.74873	4.43176	5.56076	4.89658	11.9195	9.0148	9.66016	7.41	6.62672	7.61346	11.5812	8.13487	10.515	13.1375	7.52828	10.252
CLEC17A	4.1102	4.88314	6.46458	3.69935	3.94715	8.49786	4.50915	3.91921	4.50556	4.35817	4.39454	4.56781	4.16814	6.74964	5.21866	4.00161	4.47966	6.72103	4.52521	4.36703	4.33271	3.91627	5.93124	4.71558	8.36718	4.04554	5.74504	4.01134	5.22013	4.72535	5.04895	4.89427	6.19695	4.59636	5.33101	7.32213	5.1083	5.85831	5.653	5.20024	5.78419	5.10584	4.22038	4.93469	6.05898	4.97013	4.28711	3.95211	3.84652
CLEC4C	4.24166	4.96797	4.3818	3.69935	3.94715	4.10438	3.22793	3.71905	4.02592	3.89142	4.4827	3.84421	3.22793	4.44996	4.13093	3.67816	4.06167	4.82099	4.71074	4.04357	4.43264	4.56891	3.96147	3.83318	3.85035	4.36971	4.06245	3.78525	3.22793	3.77809	3.74481	4.18675	4.0396	4.59636	3.88455	4.34188	4.18817	4.01328	4.09015	3.72736	3.79382	3.22793	3.22793	3.86205	3.91863	3.73836	3.22793	3.22793	3.667
CLEC4D	4.35583	4.15938	4.17811	3.22793	3.22793	4.01419	3.88413	3.22793	3.22793	3.69914	4.18877	3.22793	3.22793	6.07412	3.22793	4.39212	4.18638	5.75955	3.22793	3.8968	3.7316	4.39909	3.65446	3.22793	3.85035	3.22793	6.37893	4.55436	3.22793	4.16981	3.22793	3.71391	3.70064	3.22793	4.43176	3.88156	4.18817	4.48605	4.09015	4.7444	3.22793	4.59934	4.88791	5.47089	3.91863	3.73836	3.71007	4.45787	4.94256
CLEC4E	4.85603	6.02454	5.783	4.4444	6.19784	6.24905	4.43101	4.40392	5.24756	5.1465	4.56378	4.62859	4.16814	7.13351	5.21866	5.85032	4.89368	8.21534	3.99339	4.53275	4.52334	5.63146	5.02411	4.17486	5.60944	4.4562	8.13231	5.29081	4.05108	4.80824	4.36058	4.18675	3.70064	4.52308	5.47267	4.24884	5.83368	6.70341	5.38974	5.45811	5.00277	6.62672	6.40201	7.66655	5.02012	5.71764	6.70745	5.55474	6.10989
CLEC5A	3.22793	5.64791	4.46911	4.15875	4.97242	4.70419	4.98866	4.07066	3.69253	4.90317	3.71496	4.68614	4.864	5.93371	4.4857	4.88598	3.71372	6.03125	4.29847	4.27206	5.26188	5.52925	4.98357	4.66165	4.1016	4.86375	7.42519	5.345	5.38209	4.0014	5.15908	4.06199	4.90801	3.8916	5.60058	5.49701	4.06324	5.78364	4.33065	4.7444	5.86073	4.32666	5.62163	5.9415	4.06996	5.18899	5.35346	6.56921	6.03337
CLEC6A	3.22793	4.39465	4.3818	3.69935	4.70423	5.21137	3.69391	3.91921	3.8822	3.69914	3.22793	3.66535	3.22793	4.79763	4.01306	4.21915	3.22793	5.47771	3.22793	3.22793	3.7316	4.19258	3.96147	3.22793	4.80744	4.04554	5.71489	3.22793	3.70743	3.22793	3.22793	3.22793	3.70064	3.69926	3.22793	3.88156	4.56297	4.80355	3.73063	4.08466	4.1961	5.10584	5.11482	6.1079	4.06996	4.23364	4.55112	4.11038	4.1953
CLU	10.8674	11.632	12.0272	10.4423	10.0086	13.7413	9.74932	10.6385	10.7007	10.6051	10.687	11.068	8.90452	11.4741	11.9055	10.3936	10.4599	12.3396	9.33318	10.8609	12.0447	10.5455	11.8909	10.0423	12.7121	9.85205	11.2967	10.4295	11.3661	10.7772	11.3399	10.4142	11.8357	11.236	10.1957	11.7912	10.2929	10.6309	11.4587	10.1751	9.7204	11.0633	9.70738	11.095	11.3262	10.8521	11.0314	10.1605	10.3654
CMTM2	3.74255	4.39465	4.46911	3.69935	3.7391	3.91092	4.14827	3.71905	3.69253	4.03708	3.9135	3.97993	3.70423	5.06345	3.87157	4.30972	3.91177	6.24204	3.22793	4.36703	3.22793	4.71503	4.25471	3.65746	3.85035	4.36971	7.55484	3.78525	4.1743	4.72535	3.9551	3.91204	3.89351	3.69926	4.58258	3.88156	3.71465	3.87176	4.68141	4.32375	3.22793	3.93271	4.33237	3.67811	3.22793	4.10316	3.22793	4.11038	4.98696
CNKSR2	4.54998	4.79173	5.13767	4.15875	3.94715	6.41712	4.83154	4.40392	4.02592	4.15834	4.06377	4.62859	4.97274	5.3969	4.80313	5.19284	3.71372	4.82099	4.52521	4.36703	5.11536	3.91627	4.59591	3.96656	6.14222	4.36971	4.63692	4.01134	4.61861	3.77809	4.24597	4.95071	5.15188	4.44419	5.25392	5.52927	4.39382	5.00593	5.00407	4.81189	5.00277	4.87979	4.43227	4.66672	4.96585	5.0286	4.76127	3.74266	3.84652
CNR2	4.54998	5.94934	7.05405	5.35092	4.91091	9.21449	5.97025	4.91031	4.82719	6.18981	5.10938	5.81337	4.80561	7.6491	6.64874	5.26822	4.83442	7.14034	5.49647	5.20395	6.09192	5.25457	6.85984	5.18617	8.1138	4.80537	6.03899	5.44703	6.32769	4.95813	5.63794	5.65141	6.59985	5.52651	6.37225	7.58792	5.55503	6.50479	6.11227	6.47901	6.57291	5.77529	4.43227	6.274	6.34221	6.26401	5.35346	5.47537	5.18761
COL10A1	3.74255	3.22793	3.90576	3.22793	3.22793	3.62469	3.88413	3.91921	3.69253	3.22793	4.06377	3.66535	3.70423	4.44996	4.23359	3.67816	4.06167	3.22793	3.77233	4.53275	4.09179	3.91627	3.65446	3.22793	3.22793	3.70415	4.29582	4.32303	3.70743	4.16981	4.11399	3.71391	3.22793	3.69926	4.58258	4.24884	4.18817	3.87176	3.22793	3.72736	3.79382	3.72874	5.47351	3.86205	3.71863	3.73836	3.22793	3.74266	3.22793
COL12A1	12.2463	12.4843	11.6164	6.66748	8.30199	11.0231	9.27164	11.9501	10.2035	9.01889	11.5806	8.66705	7.76992	11.1786	10.5356	9.66787	11.8651	10.4222	9.46306	11.5116	12.0646	11.3688	9.41333	8.90054	10.05	9.003	12.1347	11.5163	9.54638	12.2449	9.71065	10.0841	10.1395	11.8345	11.0225	10.7578	11.1687	9.69635	11.4947	11.2372	10.8901	11.0854	9.89727	7.3533	12.3163	9.69153	9.49383	8.54257	9.02633
COL1A1	12.9731	15.7596	12.8956	9.97267	11.2003	11.9583	12.6965	11.9572	12.9221	11.1755	12.1507	12.6257	11.1592	11.7882	12.9741	12.6291	12.4986	12.9938	12.2709	12.4063	14.172	12.0885	12.3194	11.6814	11.0554	12.6289	13.6326	13.1227	12.6235	12.9996	13.1934	13.3789	12.7361	12.598	14.5276	13.3559	12.6473	12.803	12.4802	12.8117	13.1152	12.3015	11.7931	10.9212	12.5509	12.6975	12.9386	10.1935	10.5526
COL22A1	4.1102	5.12164	5.42729	4.35866	4.77733	7.20878	4.71363	3.71905	4.64575	4.03708	4.06377	4.68614	3.89854	5.24106	5.3312	4.11787	3.91177	5.63872	3.77233	4.45333	4.60671	4.39909	4.80604	3.65746	5.55396	4.86375	7.2318	4.97848	4.75352	4.0014	4.46276	4.48012	4.8527	4.26415	5.25392	5.39522	5.55503	6.03958	4.43041	4.5958	4.76505	5.1564	5.00665	4.66672	4.78639	4.84388	5.31351	3.95211	3.84652
COL5A3	7.59237	8.39344	7.74309	6.85658	7.55644	7.03843	7.36736	6.98389	7.97531	5.89772	6.73205	7.15212	8.75072	7.86035	8.3216	8.03947	7.16588	8.64702	7.7144	7.2227	9.2833	7.51929	7.58754	6.4598	7.67441	8.77423	8.89236	8.2159	7.66673	7.95824	7.44148	7.49434	8.18204	8.33166	9.03087	8.14226	7.92063	8.20197	7.64283	7.61724	8.40812	7.55607	8.23313	7.0457	7.41233	7.84858	7.99425	9.29303	8.41811
COL6A6	4.71349	3.82309	4.62399	3.89172	4.10441	4.9843	4.02825	4.07066	4.14561	3.69914	4.56378	3.66535	3.22793	4.16311	4.13093	3.22793	4.56057	3.65887	4.16016	4.6065	3.9367	3.91627	4.07201	4.17486	4.58046	3.22793	4.06245	4.01134	3.903	4.88556	3.9551	4.18675	3.89351	4.52308	3.22793	4.02514	4.48193	4.01328	5.11212	4.08466	4.02325	4.59934	3.73144	4.11778	5.1699	4.10316	3.90668	3.74266	3.84652
COL7A1	7.03702	8.22025	6.98338	4.5966	5.54127	6.69297	7.52283	6.79616	7.1558	5.59029	6.34441	6.90148	5.40713	7.58147	7.62546	7.15288	7.05336	7.86495	7.00852	6.67153	7.96063	6.39213	6.51088	5.79826	5.66271	7.40651	10.0437	7.72975	7.47626	7.16617	7.66583	7.50293	7.75647	7.40571	8.38972	7.64557	7.28515	7.83879	7.08	7.0387	7.33346	6.7855	8.55859	6.34193	6.94356	7.33623	7.62825	5.6656	4.94256
COL8A1	6.34907	8.54803	6.51585	4.66517	5.50233	6.20723	6.93707	6.49378	7.82104	5.87247	5.71817	6.24279	5.99403	7.49422	8.01258	7.80403	6.55372	7.24056	6.75995	6.88824	9.89295	6.39213	6.73036	5.72959	5.08139	6.90685	7.3978	5.04754	7.39777	6.34153	7.40042	7.00674	7.03034	7.28915	8.34658	6.87977	5.88854	6.87762	6.11227	6.38308	7.307	6.05431	8.57178	4.83484	7.25528	7.69998	7.67383	5.25297	5.45441
CPA6	5.2526	8.07624	5.56782	8.41135	7.88917	4.32692	8.06004	5.38737	8.40504	8.5642	5.41094	8.45849	5.54679	4.79763	8.48714	7.82763	5.5165	7.02321	5.88518	5.16031	7.98715	5.11617	8.43456	8.5146	4.90591	5.40682	5.36899	6.09632	7.76024	5.83788	8.50182	7.65698	8.25582	5.49316	5.25392	6.91549	4.95308	7.94272	4.8214	5.20024	5.31831	5.67913	5.81708	7.87909	5.79338	7.67505	8.22079	5.83225	7.11678
CPXM1	6.5501	9.25766	6.74754	4.4444	5.42083	6.89802	6.66795	5.53757	6.55851	5.526	6.64071	6.623	5.78871	5.80466	5.8577	5.07058	6.89244	7.77334	6.52412	7.85538	8.00023	6.88242	6.25089	5.63224	7.22126	7.88105	7.97466	8.48482	6.97305	7.20731	7.44148	6.77029	6.38642	8.3541	9.66255	7.84936	6.85731	7.54776	6.8097	7.14705	7.04396	7.53843	6.09121	6.06814	7.51112	7.3573	7.61272	4.98337	5.1112
CR1	5.98031	6.60108	8.72808	5.73963	6.51525	10.7266	6.43872	6.03647	6.03171	6.53001	6.62489	6.46014	7.04949	8.85455	7.37589	6.25672	5.9372	9.64875	6.83059	7.48535	7.36382	7.04647	7.69505	5.7059	9.38886	7.18866	9.62388	8.04063	7.36146	7.0198	5.96127	5.74391	7.73598	6.89357	8.27475	8.63678	7.40951	7.89745	7.70784	7.84107	7.55184	8.51247	7.05925	7.74301	8.20082	7.17931	7.19964	5.92327	6.46899
CRABP2	4.1102	6.50055	4.54942	4.4444	4.44976	4.50581	4.25275	4.91031	4.98397	4.26388	4.18877	5.10492	4.16814	5.06345	5.36663	5.50203	3.91177	5.80502	3.99339	4.74043	7.20308	4.06711	5.91112	4.2617	5.60944	4.53578	5.05714	4.44544	5.17622	4.0014	5.26032	5.32783	5.77306	4.72945	5.43866	5.35945	4.48193	5.05162	4.33065	4.32375	5.00277	3.93271	4.43227	7.48543	5.07209	5.68366	5.46643	4.71378	4.50785
CRLF2	4.24166	4.06385	4.69373	3.22793	3.7391	4.2589	3.22793	4.40392	3.69253	3.22793	4.18877	3.22793	3.70423	4.04126	3.22793	3.67816	4.47966	4.41737	3.22793	3.8968	3.9367	4.39909	4.07201	4.17486	3.85035	3.70415	5.24457	4.01134	3.903	4.43048	3.9551	3.71391	4.16122	3.8916	4.77504	4.50436	4.29682	3.68506	4.09015	3.9308	3.22793	4.08697	3.22793	4.11778	4.19583	4.34699	4.17937	3.95211	3.22793
CRTAC1	4.35583	5.43962	4.88022	4.35866	3.22793	4.74861	4.14827	4.57436	4.42762	4.72907	4.70943	3.84421	4.36989	5.35966	5.70405	4.9818	4.9501	4.95759	4.94168	5.5082	6.51746	4.78144	4.59591	4.34078	4.69975	4.53578	4.83581	5.23424	4.92992	5.02655	5.30809	4.70645	5.27813	5.14695	4.43176	4.9824	4.56297	4.85749	4.88547	5.15172	4.76505	4.21521	3.93648	4.00154	5.12195	4.23364	5.04332	3.95211	3.22793
CSAG1	3.95196	3.65025	3.70941	3.89172	3.22793	4.10438	3.22793	3.22793	3.22793	3.22793	3.22793	3.22793	3.22793	3.89488	3.68492	3.22793	3.22793	3.22793	3.22793	3.22793	3.22793	3.71694	3.65446	3.22793	3.85035	3.22793	4.18726	3.22793	3.22793	3.22793	3.22793	3.22793	3.22793	3.22793	3.22793	3.69207	3.91307	3.68506	3.73063	3.22793	3.22793	3.22793	3.22793	3.22793	3.22793	3.22793	3.22793	3.22793	3.22793
CSF2	4.24166	4.32281	4.05441	4.26433	3.22793	3.7873	3.69391	3.71905	3.69253	4.03708	4.29748	3.84421	3.70423	4.6716	4.01306	3.22793	4.18638	5.53357	3.99339	4.16575	4.09179	4.56891	4.80604	3.22793	4.69975	3.89843	4.89511	4.44544	3.22793	5.21164	3.22793	3.22793	3.89351	3.69926	4.34682	4.14473	3.71465	4.23388	4.09015	4.32375	4.02325	4.32666	5.21434	4.53844	3.22793	3.73836	3.71007	4.24186	4.74612
CSF2RB	8.98794	10.3704	10.3886	7.85382	8.88083	11.6557	9.76739	8.87722	9.56348	8.84624	9.07761	9.23946	9.45928	11.5764	10.0685	9.77174	8.94728	11.6468	10.1121	9.3029	9.54187	9.96271	9.78924	8.72331	10.9102	10.5735	12.1184	9.92389	9.97259	9.92013	9.60651	9.96674	9.95411	9.85756	11.3225	10.7012	9.96488	11.1434	10.1666	9.78597	10.2702	10.8561	9.96707	10.472	9.76865	9.58424	10.2732	9.00893	9.38832
CSF3	3.74255	4.52416	3.90576	3.22793	3.7391	3.91092	3.22793	3.91921	4.14561	4.26388	3.22793	3.66535	3.70423	6.94248	3.68492	3.67816	3.71372	8.54655	3.22793	3.8968	3.7316	4.56891	4.70593	3.22793	3.22793	3.22793	7.45208	3.78525	3.70743	3.77809	3.9551	3.22793	4.36161	3.69926	4.43176	3.88156	3.71465	4.40917	4.88547	3.72736	3.22793	3.72874	8.34487	5.02683	3.71863	3.73836	3.90668	4.45787	4.98696
CSF3R	7.10203	7.51101	7.58552	5.42415	6.19784	7.31636	6.91352	7.11581	7.14581	6.82994	7.02425	6.40139	6.73527	8.69333	7.28201	7.74947	7.13304	11.0279	6.97778	7.28113	7.08492	7.5107	6.87012	6.32908	6.7819	8.00789	12.0319	8.70647	7.26644	7.98207	7.10037	7.11172	7.15944	7.65052	8.73232	7.24019	8.42004	7.66729	7.90086	7.0635	7.42237	7.79009	7.82667	7.49283	7.60354	7.65818	7.59703	6.69308	8.08763
CSGALNACT1	8.17154	8.91981	7.92945	6.01845	6.69305	8.88292	7.18316	7.59763	7.22387	6.06259	7.15059	6.82574	6.6027	8.29935	7.82598	6.99457	7.78102	7.9706	7.09697	7.96021	8.29893	7.70398	7.29248	7.06116	8.07637	7.29699	8.38989	7.68072	7.59041	8.07365	7.31461	7.23038	7.42186	8.07493	7.89806	7.74779	7.09291	7.49549	8.11957	7.95772	7.93484	8.20731	7.56146	6.48375	7.90354	7.81094	7.98825	6.49323	6.55287
CSMD2	4.54998	5.98745	5.60075	4.03744	4.70423	5.52577	4.98866	4.57436	4.50556	3.89142	4.56378	4.74084	4.27471	5.01478	4.68698	5.4069	4.83442	5.80502	5.49647	4.80181	6.57149	5.2101	5.06336	4.34078	4.58046	5.02337	4.89511	5.29081	5.17622	4.80824	4.92796	5.05623	4.90801	5.59082	6.35472	6.23426	4.83724	5.09566	5.05928	4.93613	5.47599	4.67632	4.6836	4.11778	4.96585	4.77526	5.6356	4.24186	3.84652
CTA-150C2.13	3.22793	4.15938	4.28571	4.79073	4.34855	3.22793	5.74367	3.22793	5.68179	5.94687	3.22793	5.06499	5.29165	3.22793	5.17883	5.56185	3.71372	3.83514	5.13507	3.70299	5.06245	4.19258	5.1014	5.68179	3.22793	4.53578	3.22793	3.22793	4.46425	3.77809	5.52367	5.36798	4.73349	3.8916	3.88455	4.02514	3.22793	4.48605	4.21883	3.22793	5.26119	3.22793	4.09152	3.22793	3.22793	4.77526	4.38331	5.152	5.36068
CTA-250D10.23	5.09795	4.74315	6.88334	4.5966	4.62598	8.97783	4.58175	5.26217	4.64575	4.35817	5.15709	5.14362	4.04567	7.04679	6.37667	4.46801	4.89368	6.80006	4.71074	4.6755	4.43264	4.78144	6.2977	4.54504	7.61032	5.331	6.34069	5.345	6.36522	5.02655	5.30809	5.05623	6.77183	5.62184	5.92442	7.967	5.20194	6.23719	6.3782	6.07328	6.21924	6.7855	4.52295	6.52802	6.28176	5.64881	5.6977	4.35606	3.667
CTB-114C7.4	3.74255	3.82309	4.17811	3.22793	4.10441	4.44973	3.88413	4.07066	3.8822	3.89142	4.29748	3.84421	3.89854	4.6716	3.68492	3.67816	4.06167	4.8683	3.77233	4.04357	4.2207	4.19258	3.82898	3.22793	4.29022	3.89843	5.71489	4.55436	4.05108	4.0014	3.9551	3.71391	4.0396	4.15858	4.02876	4.24884	4.77471	4.13119	4.21883	3.72736	3.79382	3.72874	3.73144	4.21905	3.71863	4.23364	3.90668	4.45787	4.28386
CTB-133G6.1	3.95196	4.63918	6.04126	4.35866	4.23506	7.00661	4.34612	4.57436	3.22793	4.52275	4.06377	4.8429	4.67904	5.95812	5.43472	4.21915	4.77198	5.73623	4.94168	4.6065	4.2207	4.71503	5.17415	4.54504	6.87251	4.16799	4.48078	4.55436	4.28151	4.16981	3.74481	4.39212	4.44755	4.44419	5.08414	5.43003	4.29682	5.00593	4.6042	5.41853	5.57151	4.74827	4.22038	5.11251	4.64901	4.84388	4.76127	4.6351	3.667
CTB-134H23.3	5.66518	7.99157	5.9437	7.5765	6.99322	4.2589	6.92535	5.73521	8.55553	8.96749	5.20305	7.88396	5.54679	4.04126	8.84648	7.52234	5.05559	6.08702	5.24909	5.5082	7.84939	4.48756	8.51164	8.30524	5.23502	5.92023	5.36899	4.55436	8.69495	4.63583	8.40677	7.11172	8.11489	4.90358	6.20603	6.27183	4.83724	8.4726	5.05928	5.24696	5.37302	4.8159	7.48905	8.15091	5.73347	7.52495	8.52395	7.47047	7.9204
CTB-43E15.3	4.45763	4.32281	3.90576	3.22793	3.7391	4.32692	3.69391	3.22793	3.8822	3.89142	3.71496	3.84421	4.27471	3.89488	4.32537	3.67816	3.22793	4.26497	3.77233	4.36703	3.9367	3.22793	3.22793	3.22793	3.85035	4.27454	5.20026	4.32303	4.05108	3.22793	3.9551	4.18675	4.66882	4.52308	5.745	5.24582	3.22793	4.68737	4.6042	4.08466	5.42551	3.72874	3.93648	3.67811	3.71863	4.10316	4.05552	3.74266	3.22793
CTB-43E15.4	3.95196	3.22793	4.3818	3.69935	3.22793	4.50581	3.69391	4.30616	3.22793	3.22793	4.39454	3.66535	3.22793	3.70161	3.22793	3.86212	3.22793	4.66602	3.22793	4.04357	4.2207	4.30169	3.65446	3.96656	4.29022	4.27454	5.68406	3.78525	4.05108	4.30943	3.9551	3.22793	4.44755	4.15858	4.98969	4.02514	4.48193	4.32568	4.21883	3.9308	4.02325	4.08697	4.09152	4.11778	3.71863	3.22793	4.05552	4.11038	3.22793
CTB-61M7.2	3.22793	3.65025	3.70941	3.22793	3.22793	3.7873	3.22793	3.22793	3.22793	3.22793	3.71496	3.22793	3.70423	4.85578	3.22793	3.67816	3.22793	5.11852	3.77233	3.22793	3.22793	3.91627	3.22793	3.22793	3.22793	3.22793	5.65251	3.22793	3.22793	3.22793	3.22793	3.71391	3.22793	3.22793	4.14885	3.88156	3.71465	3.22793	3.22793	3.22793	4.02325	3.22793	4.33237	4.11778	3.22793	3.22793	3.90668	3.95211	4.43876
CTC-378H22.1	4.45763	3.95433	4.69373	3.69935	3.7391	5.21137	3.88413	3.91921	4.14561	3.69914	3.9135	4.19176	3.22793	4.85578	4.01306	3.67816	3.22793	3.96894	3.77233	4.16575	3.7316	3.91627	4.59591	3.96656	4.80744	4.16799	4.18726	4.01134	4.37725	4.0014	3.74481	3.71391	4.16122	4.26415	4.43176	4.70819	4.48193	4.01328	4.8214	3.9308	4.1961	4.51637	3.22793	4.11778	4.40296	4.23364	3.71007	3.95211	3.22793
CTD-2020K17.1	5.20313	4.83833	6.19705	4.03744	4.23506	7.10001	4.98866	5.76551	4.82719	4.26388	5.59026	5.02372	4.4564	6.79035	6.06002	4.46801	5.58524	6.74406	5.24909	5.28697	4.68404	5.11617	5.33963	4.17486	6.10489	6.67747	7.14648	6.46808	6.4549	5.76445	6.35919	6.25967	7.12824	6.94202	6.8912	7.18284	6.74514	6.95734	6.53108	5.94349	6.61691	6.54012	4.43227	5.40672	6.40017	5.96267	5.92109	4.35606	4.1953
CTHRC1	5.59231	7.53012	5.83869	4.15875	5.03094	6.41712	5.56846	5.76551	5.24756	4.90317	5.52141	5.25303	5.4788	5.69185	5.92849	5.50203	5.7431	6.69762	5.58371	5.75535	6.8293	5.41851	5.86997	4.86343	6.28225	5.99367	8.3188	6.58017	5.93488	6.90762	6.04507	5.98881	6.09162	6.4821	7.27067	6.90368	6.45471	6.95734	6.06256	5.80018	5.61682	6.92831	7.23587	6.23876	5.85077	5.71764	6.22103	4.92155	5.18761
CTLA4	5.15164	7.55521	7.24725	4.26433	6.02082	7.81932	5.65891	4.78761	5.24756	4.35817	4.56378	6.02517	4.67904	7.51855	5.90529	4.60463	5.05559	8.16114	5.70476	6.12434	5.75567	6.53578	6.76386	4.9088	7.30474	5.29136	7.98695	6.18472	6.18778	5.83788	5.56285	5.51725	6.87592	6.23037	8.13465	7.93271	6.83009	7.4725	5.6867	6.44142	6.701	7.08271	6.14007	7.46298	5.67079	5.53846	7.36647	5.47537	6.10989
CXCL13	4.1102	4.32281	11.4395	6.89403	8.62246	14.1197	7.8963	5.17136	4.34294	9.19805	4.39454	5.06499	5.29165	11.395	9.32089	4.53857	4.56057	11.3406	5.24909	4.74043	5.58675	4.39909	10.3704	6.56662	12.2664	4.04554	7.11313	4.82715	8.31877	4.0014	4.36058	5.91193	8.61843	4.84839	6.68357	10.7995	5.15599	9.73702	8.83401	9.62536	10.0355	9.7371	6.95529	10.9191	8.99733	8.32494	4.99199	7.39993	6.41017
CXCL6	8.14104	5.80694	7.30626	4.4444	4.91091	7.44038	3.88413	7.40523	5.32447	5.49264	7.15059	5.2875	5.29165	10.4571	6.45765	5.23109	6.90549	7.95106	6.70457	7.11967	6.25596	9.60017	5.33963	4.60494	5.90154	7.00322	12.0832	9.40879	4.75352	9.41062	6.26983	4.89427	5.65797	7.42283	8.35095	6.21509	8.55426	6.66313	8.11957	7.05115	5.93321	9.2293	8.38526	6.88564	8.28936	5.37543	6.22103	5.04218	5.70135
CXCR1	4.1102	5.43962	5.46385	4.4444	4.77733	4.32692	3.69391	3.91921	4.24982	3.22793	3.9135	4.0931	3.22793	6.29963	4.13093	5.72675	3.71372	9.34112	4.29847	4.6065	4.60671	5.52925	5.1014	3.96656	4.44596	4.80537	10.8754	4.82715	3.70743	5.02655	4.55545	4.18675	4.36161	4.59636	6.47305	4.42648	4.6382	5.21917	5.95747	4.81189	4.46333	4.59934	6.47949	5.50184	4.06996	4.62407	4.17937	5.47537	7.73707
CXCR2	5.04184	6.4063	6.3561	5.23266	6.12471	5.92586	5.12769	4.96718	5.32447	4.84799	5.15709	5.10492	5.02364	7.09081	5.40112	6.42271	5.19863	9.68905	5.19336	5.43853	4.52334	6.48361	5.4296	4.60494	5.60944	5.47849	11.2025	6.64339	4.54429	5.64628	5.21071	5.10577	5.56471	6.17	6.92697	5.24582	5.77652	6.03958	6.418	6.19196	5.93321	5.64549	7.09636	5.70043	5.30374	5.61303	4.76127	6.34955	8.19928
CXCR4	8.13486	11.6068	10.7559	7.51398	9.19949	12.3071	9.36953	8.71724	9.00153	8.87442	8.15866	9.51066	7.99089	10.4738	11.0674	9.08949	7.9721	10.3467	9.18039	8.29791	8.99763	8.73869	9.8013	8.13086	10.7927	8.72236	10.5386	9.00575	10.0753	7.85873	8.91193	9.08013	10.629	9.08545	10.1463	10.8554	8.83849	10.356	9.31994	9.10452	9.70281	9.28048	8.62754	9.53435	9.23342	9.59975	10.3982	7.62859	7.9204
CXCR5	4.35583	6.14707	8.79806	4.9566	5.90849	10.8035	5.8988	4.49271	4.14561	5.94687	4.63905	6.27598	4.80561	8.87662	7.68661	4.21915	4.29485	8.78017	4.29847	5.5082	5.84776	5.52925	8.36401	5.18617	10.4749	4.74387	6.8277	5.04754	7.09993	4.30943	5.98977	6.4865	7.99359	5.10198	6.52088	9.54752	4.89658	7.3003	7.12842	7.21498	7.10674	6.99469	4.75585	7.24335	7.57062	6.67272	5.92109	5.73473	5.02978
CXXC11	3.22793	3.22793	4.05441	3.22793	3.22793	3.7873	3.69391	3.71905	3.22793	3.69914	3.71496	3.97993	3.22793	3.70161	3.68492	3.22793	4.06167	3.65887	3.22793	3.70299	3.7316	3.71694	4.07201	3.65746	3.22793	3.89843	3.22793	3.22793	3.70743	3.77809	3.74481	3.22793	3.22793	3.69926	3.69422	4.24884	3.71465	3.87176	3.22793	3.72736	3.22793	3.93271	3.22793	3.67811	3.22793	3.22793	3.22793	3.22793	3.22793
CYP26B1	9.55532	6.7506	7.35364	6.85658	8.14106	7.3547	7.17329	7.63	7.72387	8.42289	6.36367	6.50265	7.54905	6.67907	7.22809	7.25237	7.95971	7.02321	7.42736	7.19256	6.69008	6.53578	5.86997	6.5275	5.60944	7.41527	8.99013	8.77337	7.42442	8.98125	7.00754	6.82633	6.91307	6.14928	6.99593	6.34408	8.07854	7.54041	7.46612	6.89403	6.9614	7.11884	8.28742	7.24335	8.33411	6.43395	7.33841	5.73473	5.18761
CYP7B1	6.53123	6.95371	6.44707	4.52331	5.42083	7.31636	6.43872	6.10836	6.39824	6.04021	5.52141	5.83608	5.29165	7.7137	6.60688	5.80223	6.12994	8.4868	5.98302	6.46726	7.08492	7.08179	6.53702	5.25526	5.9865	4.67882	6.50516	5.86508	6.26943	5.3731	5.67396	5.36798	6.25653	5.38771	6.08311	5.6798	5.94129	6.10187	5.87303	6.60321	6.79956	6.65993	5.84708	6.30838	6.05898	6.83241	6.32113	5.51565	5.8212
DAZL	3.22793	3.65025	4.17811	3.89172	3.22793	3.7873	3.69391	3.71905	3.69253	4.15834	3.22793	4.28003	3.22793	4.04126	4.32537	3.22793	3.22793	5.73623	3.22793	3.22793	3.9367	3.22793	4.94161	3.83318	4.1016	3.70415	3.91241	3.78525	4.37725	3.22793	4.55545	3.91204	4.66882	3.22793	4.14885	4.50436	3.22793	4.40917	3.22793	3.72736	3.22793	3.22793	4.60629	4.11778	3.22793	4.97013	4.05552	3.22793	3.22793
DCC	4.35583	4.58323	4.69373	4.03744	4.5416	4.65791	4.77411	3.71905	4.34294	3.89142	3.71496	4.28003	4.6099	3.70161	4.55714	4.30972	3.71372	5.44887	3.99339	4.16575	4.43264	4.48756	4.07201	4.34078	3.85035	4.16799	5.51831	3.22793	4.05108	3.77809	4.11399	4.06199	4.0396	3.8916	4.93956	4.34188	4.29682	5.1382	3.93534	4.21257	4.67351	6.24299	4.88791	5.11251	4.19583	4.23364	6.02048	3.74266	3.98273
DKK1	4.24166	4.06385	3.90576	6.53109	5.87891	5.08674	4.98866	3.91921	4.14561	4.03708	3.71496	3.97993	4.16814	3.70161	4.74655	4.46801	4.47966	4.82099	4.62197	4.96862	3.22793	4.30169	4.53635	4.07783	4.58046	4.67882	4.39274	4.01134	4.81535	3.77809	4.92796	4.63619	4.66882	4.59636	5.47267	5.07655	4.29682	4.80355	4.6042	4.08466	3.22793	5.10584	4.60629	4.11778	4.84931	4.70224	5.31351	4.11038	3.84652
DNAAF1	3.74255	3.22793	3.90576	3.22793	3.22793	3.7873	3.69391	3.71905	3.22793	3.69914	3.71496	3.22793	3.70423	3.22793	3.68492	3.22793	3.22793	4.17787	3.99339	3.70299	3.7316	3.91627	4.07201	3.22793	3.22793	3.70415	4.63692	3.78525	3.22793	3.77809	3.9551	3.71391	3.70064	3.8916	4.2534	3.69207	3.91307	3.68506	3.22793	3.22793	3.79382	3.93271	4.09152	3.86205	3.71863	3.94612	3.90668	3.22793	3.98273
DNAH8	3.95196	4.15938	5.49942	4.52331	4.5416	6.589	4.25275	3.91921	4.02592	4.26388	4.29748	4.36038	4.04567	4.44996	4.4857	3.22793	3.71372	5.71251	4.16016	4.04357	4.2207	3.91627	5.33963	3.22793	5.76332	3.70415	4.77333	4.55436	4.87403	4.30943	4.11399	4.18675	5.06006	4.59636	5.08414	5.35945	4.18817	5.29529	4.68141	4.32375	4.57365	4.59934	3.93648	4.78152	4.57328	4.90868	4.55112	4.11038	3.98273
DOK3	7.45012	8.09344	8.63936	6.54691	6.9659	9.86771	7.62026	6.98389	7.62684	7.41359	7.38343	7.38047	7.61895	8.67905	8.21967	7.74947	7.26009	9.17865	7.48301	7.78995	7.75221	7.61059	8.15004	7.16621	9.1888	8.5306	9.72992	8.26325	8.09431	8.15277	7.98295	8.25269	8.02207	7.9029	8.86659	8.96807	8.54181	9.11261	8.2936	8.2219	8.53288	8.65814	7.61346	8.23267	7.63572	7.64968	8.42539	6.72657	6.69482
DPP10	7.22382	3.82309	6.21794	8.58076	8.21802	7.10001	9.2414	7.78175	8.8473	9.25394	7.60785	7.60344	8.72634	7.41003	8.76704	8.79889	7.60109	7.68736	8.99428	7.25221	5.58675	7.20432	8.5343	8.57918	5.43554	8.00789	5.68406	4.65299	9.13113	7.38505	8.90096	8.5624	8.74674	7.27035	3.69422	5.03038	7.13792	6.21864	5.87303	5.916	7.75117	6.69238	6.49821	6.37471	7.69037	6.62109	5.50203	4.11038	3.667
DPPA4	3.95196	3.95433	4.05441	3.22793	3.22793	4.44973	3.22793	3.71905	3.8822	3.69914	3.22793	3.66535	3.22793	4.16311	3.68492	3.22793	3.22793	4.41737	3.22793	3.70299	3.7316	3.91627	3.65446	3.22793	4.29022	3.22793	3.71418	3.22793	4.54429	3.22793	3.22793	3.71391	4.36161	4.15858	3.22793	4.64444	3.91307	4.01328	4.33065	3.9308	4.02325	3.22793	3.22793	3.22793	3.71863	3.22793	3.22793	3.22793	3.98273
EBF2	3.74255	4.58323	4.28571	3.22793	3.22793	3.62469	3.22793	3.22793	3.8822	3.89142	3.9135	3.84421	3.70423	4.16311	3.68492	3.67816	3.91177	4.26497	3.77233	3.70299	3.7316	4.06711	3.96147	3.65746	4.29022	3.22793	4.06245	4.01134	3.903	4.30943	3.22793	4.18675	3.22793	4.03729	3.22793	4.34188	4.06324	3.68506	4.21883	3.22793	3.79382	3.72874	4.22038	3.67811	4.19583	3.22793	3.22793	3.74266	4.36448
EBF3	3.95196	6.43388	4.3818	4.15875	4.84603	4.94814	3.69391	3.22793	4.02592	4.03708	3.71496	5.06499	4.04567	4.36387	5.64871	4.30972	4.39169	4.99985	4.16016	3.70299	4.8884	4.84419	5.61835	4.66165	4.58046	3.70415	4.56175	4.18178	4.81535	4.43048	5.39862	4.70645	5.27813	4.26415	5.12878	4.50436	4.48193	4.68737	4.21883	4.32375	4.67351	4.32666	5.30661	4.21905	4.19583	5.41812	6.20012	3.74266	4.28386
EGFL6	4.63482	5.54784	4.88022	4.03744	4.34855	5.08674	4.43101	4.40392	4.88179	4.44387	4.56378	3.97993	3.89854	4.52919	4.23359	4.11787	4.70591	5.63872	5.88518	4.6065	5.11536	4.30169	3.96147	4.17486	4.80744	5.16449	7.42519	4.97848	5.17622	4.88556	4.55545	4.18675	4.6001	4.79046	6.0396	4.76848	4.89658	4.80355	5.11212	5.04865	4.84975	5.29696	5.62163	4.21905	5.02012	4.62407	5.2297	4.55024	3.98273
EPHB1	4.45763	5.69529	5.22731	4.4444	5.03094	6.13461	4.50915	5.6725	5.32447	4.66456	4.89756	6.15621	4.27471	5.19895	4.23359	3.67816	4.70591	5.68836	3.99339	5.24614	5.06245	5.75667	4.59591	4.48149	5.71395	5.07222	7.74787	6.12641	4.37725	5.51671	5.67396	4.70645	4.26706	5.31236	7.44481	5.76265	5.33059	4.5575	4.8214	6.47901	5.00277	5.10584	5.75501	4.78152	5.76376	5.68366	4.47072	6.55059	6.0529
FAIM3	8.70923	8.7594	9.78863	6.71017	7.12252	11.9748	8.74716	8.31176	7.12561	8.33544	8.37101	8.30846	8.19261	9.93169	9.61931	7.73081	7.88957	9.35231	7.56779	8.3623	7.98057	8.59598	9.33991	7.31059	11.3673	9.14632	9.28923	9.39975	9.02806	8.26061	7.85982	8.46929	9.90455	9.11726	9.25028	10.613	8.75104	8.8738	9.3982	9.08957	9.37497	9.35273	7.53473	8.82519	9.19621	8.56522	7.92059	6.94123	6.41017
FAM129C	4.35583	4.58323	7.23717	4.26433	4.44976	8.95313	4.71363	3.91921	4.34294	4.79008	4.56378	5.44732	3.22793	7.77551	6.88856	4.11787	3.91177	7.07847	4.41842	4.45333	5.00717	4.78144	6.16921	4.48149	8.05729	4.27454	5.83166	4.18178	6.40178	4.63583	5.48329	5.71377	6.86331	4.72945	5.745	8.42303	4.6382	5.95192	6.51286	6.70163	6.55039	6.02881	4.09152	5.47089	6.61077	5.84563	4.99199	4.24186	4.69126
FAM132B	5.98031	4.83833	5.69495	4.35866	3.94715	4.44973	4.25275	5.26217	4.14561	4.35817	4.83819	4.28003	3.89854	4.79763	4.4857	4.30972	5.61833	5.35834	4.16016	5.78329	4.2207	4.64443	4.07201	3.65746	4.44596	4.91936	7.11313	6.26785	5.59265	6.41422	4.46276	3.91204	4.16122	5.55905	5.43866	4.76848	5.28912	4.40917	5.25845	3.72736	4.33929	5.38279	4.6836	4.46789	5.87858	4.84388	4.69559	3.74266	4.0963
FAM159A	4.54998	4.58323	5.46385	3.69935	4.23506	6.80846	4.34612	4.57436	4.34294	4.03708	4.56378	4.93673	4.36989	6.00569	5.43472	4.66685	4.39169	5.87051	4.16016	4.27206	3.7316	4.30169	5.02411	4.17486	6.55404	4.86375	4.95157	4.65299	5.03444	4.80824	4.64059	4.63619	5.27813	4.66492	5.08414	6.32637	4.95308	5.09566	5.25845	5.33559	5.07258	4.59934	4.43227	5.15323	5.53592	4.62407	4.47072	3.74266	3.667
FAM172BP	3.22793	4.88314	3.90576	3.22793	4.10441	4.79136	3.69391	3.71905	3.22793	3.89142	3.71496	3.66535	3.70423	4.26915	4.32537	3.67816	3.71372	4.77165	3.22793	3.22793	3.7316	4.06711	4.3333	3.65746	4.80744	4.53578	4.29582	3.22793	4.37725	4.16981	3.74481	4.29525	4.52664	3.22793	4.77504	4.14473	3.91307	4.5575	4.09015	4.21257	4.1961	4.99807	3.22793	4.21905	4.19583	3.73836	3.90668	3.22793	3.22793
FAM20A	6.39163	7.03645	6.19705	4.72971	5.75376	6.76148	5.43744	6.06085	5.9405	5.31188	5.4488	5.18115	4.91961	7.41003	6.30835	5.82649	6.08421	8.37405	5.91857	6.24821	6.72222	6.02707	6.26667	5.11307	6.5263	6.47304	8.41738	7.40681	6.83377	6.46067	6.65137	6.58755	6.58453	6.41465	7.60742	6.67241	6.15653	6.54976	6.18364	6.09784	6.48059	6.65993	6.32002	6.73071	6.12963	5.75078	6.67774	4.92155	5.14999
FAM65B	7.33604	8.71288	9.57212	5.82147	7.12252	11.3217	7.59098	7.98924	7.58316	7.13064	7.62374	7.93609	7.5883	10.2517	8.96347	7.551	7.30987	10.4239	7.66718	7.87445	7.75992	8.40553	8.7762	7.02436	11.0336	7.78306	10.269	8.49619	7.99725	7.75183	7.57657	8.1473	8.97347	7.93303	8.89979	9.67902	8.06699	8.37285	8.56729	9.06534	9.24211	8.89439	7.84128	8.86275	8.9048	8.53325	7.84295	7.10256	7.68887
FAM92B	3.74255	4.63918	5.09033	3.22793	4.23506	4.44973	4.02825	3.71905	4.42762	4.26388	3.9135	4.36038	4.864	4.52919	5.90529	4.60463	4.06167	4.77165	4.52521	4.04357	4.09179	4.30169	4.47317	4.2617	5.30537	4.97248	5.5871	3.78525	5.26257	4.0014	4.79327	4.18675	5.01147	5.05532	5.90019	5.16403	5.33059	6.53493	4.68141	4.21257	4.67351	5.1564	4.88791	4.6045	4.71981	4.34699	6.60063	4.45787	3.98273
FAP	5.43343	6.24413	6.01751	4.90386	5.03094	6.39254	5.03677	5.12339	4.82719	4.15834	5.4488	5.10492	4.4564	5.95812	5.64871	4.93485	5.85736	6.86446	5.0096	5.75535	6.21102	5.84353	5.97062	4.71558	5.9865	4.53578	7.32207	5.39701	5.71657	5.76445	5.74325	4.835	6.13471	5.89829	6.82951	5.98472	4.95308	5.17933	5.30371	5.10126	5.00277	5.5392	7.47036	6.34193	5.53592	5.57626	5.72772	4.78728	5.18761
FCAR	3.74255	4.63918	4.05441	3.69935	3.22793	3.22793	4.02825	3.71905	4.34294	3.69914	3.71496	3.66535	3.70423	5.69185	3.68492	4.78166	3.71372	6.59992	3.22793	3.22793	3.22793	4.06711	3.65446	3.22793	3.22793	4.27454	6.81389	3.78525	3.70743	4.30943	3.74481	3.71391	3.22793	3.69926	4.58258	4.14473	3.91307	4.13119	4.33065	4.08466	3.22793	4.08697	5.21434	4.46789	3.22793	3.22793	3.90668	4.85634	5.18761
FCER2	6.30517	5.43962	7.90426	4.84867	5.68659	9.65191	6.38804	5.12339	4.42762	4.66456	5.94267	5.56249	5.07249	7.64174	6.71588	5.3736	6.12994	8.00416	5.88518	7.89326	5.84776	7.93332	7.21419	5.60676	9.66238	5.78836	6.8277	6.66386	6.47217	7.37306	6.33738	6.9449	7.26834	6.75117	7.01819	9.25356	4.95308	6.60758	7.72364	6.85188	7.21037	6.17519	4.82376	5.4392	6.59437	5.9054	4.47072	5.34654	4.57257
FCGR1A	4.85603	6.95371	6.37477	5.35092	5.6159	5.11908	5.84902	5.53757	6.39824	6.32491	5.10938	5.79027	6.43918	7.13351	5.80838	6.79256	5.05559	8.32938	6.91423	5.01942	7.19169	6.53578	6.61265	5.96613	6.68511	6.99152	8.931	7.30682	6.57159	4.88556	5.60092	6.28003	6.23695	4.52308	7.29818	6.17594	7.37238	6.7554	5.6867	6.42224	7.15208	6.85869	6.68929	7.76151	6.0098	6.33017	7.73244	6.06275	6.03337
FCGR1B	3.95196	4.79173	4.69373	4.15875	3.22793	4.44973	4.50915	4.19663	5.2073	4.44387	4.18877	4.62859	4.80561	5.28182	4.74655	5.30431	4.18638	6.916	5.19336	4.36703	5.39333	4.84419	5.1383	4.17486	4.44596	4.86375	6.84137	4.90523	4.46425	4.0014	4.71954	4.70645	4.36161	4.26415	5.40375	4.42648	5.05872	4.68737	4.43041	4.9937	5.42551	5.25181	4.6836	5.6189	4.19583	4.97013	5.50203	4.45787	4.74612
FCGR3B	4.85603	6.50055	6.1324	5.10229	6.28974	5.08674	5.17077	5.21758	5.16572	4.79008	5.48561	5.2176	4.7441	6.88106	4.68698	6.35865	4.70591	10.663	5.0096	5.57439	5.16611	6.92199	5.45827	4.54504	5.23502	6.2928	11.5316	4.97848	4.54429	5.51671	5.48329	5.19931	5.59652	4.79046	6.50511	5.12106	6.24245	6.16148	6.29504	5.73836	5.2014	6.40922	8.22202	6.45345	4.64901	5.99043	5.2297	6.14016	8.66824
FCN1	5.30023	8.22025	5.69495	3.89172	5.9658	5.45398	4.50915	5.34697	5.59347	5.31188	4.06377	4.62859	4.27471	10.1086	5.43472	8.30191	4.47966	8.57871	5.07393	5.47382	7.22558	7.40333	5.69174	4.2617	5.30537	6.06341	9.94963	4.90523	4.75352	5.56131	6.48341	5.77339	5.74519	4.52308	7.32517	5.6798	6.28351	6.99018	5.58294	5.20024	5.42551	6.42868	7.26872	6.7053	4.84931	5.9054	4.38331	5.70061	6.48332
FCRL1	4.45763	4.52416	7.78511	4.4444	5.03094	9.815	5.74367	4.40392	3.8822	4.79008	4.39454	5.32108	4.53599	8.26149	7.05295	4.21915	4.83442	7.7108	4.52521	5.43853	5.2149	4.71503	6.61265	4.71558	8.43525	4.80537	6.8277	5.11292	6.7933	5.26774	5.39862	5.96366	7.69408	5.35058	6.20603	8.41064	4.48193	6.57896	6.68537	6.93496	6.9783	6.44787	3.73144	5.82628	6.85026	6.5675	5.18563	4.35606	4.28386
FCRL2	6.0355	6.68354	8.66206	5.23266	6.49618	10.936	7.09184	5.34697	6.13787	5.89772	6.11293	7.06085	7.34407	9.08868	7.94193	6.30861	5.80143	8.27546	7.58822	6.08048	6.72222	6.02707	7.58754	5.47153	8.74632	7.25854	8.47954	6.12641	8.47952	6.41422	7.36884	7.49434	8.47345	6.63784	8.27014	8.8291	6.1115	8.22046	7.59206	7.81947	8.30524	8.8235	6.81369	7.10501	8.14607	7.76443	7.0575	5.152	4.79844
FCRL3	5.62924	6.55171	9.21612	5.45929	6.4172	11.4661	6.45521	4.85057	4.64575	5.38721	5.37195	6.81458	6.23425	9.2735	8.13454	5.11268	5.10512	8.66809	5.19336	5.81067	5.51274	5.33913	8.67204	5.79826	10.0739	6.50648	7.2318	5.96896	7.57465	5.15294	6.50308	6.61969	8.18204	6.65251	7.26138	9.06351	5.96693	7.36836	7.71576	8.07171	7.94343	7.51156	4.94875	7.6534	8.27922	7.69998	6.22103	5.51565	5.5419
FCRL5	7.28103	8.78079	9.14272	6.21095	7.41247	10.6627	8.50618	6.24189	7.67617	6.75051	7.00003	8.23964	8.41816	8.89528	9.25301	8.35155	6.90549	9.90343	9.35119	7.55008	8.66582	7.39401	8.3891	6.98658	9.47039	9.90882	10.6246	7.56658	9.80243	7.43204	8.86002	8.91668	9.22669	8.29038	10.394	10.0741	8.16234	10.1329	8.50929	8.30192	9.64082	10.2907	8.69334	8.66763	8.53064	8.89124	9.61733	6.32777	6.34878
FCRLA	4.35583	6.70624	9.24145	5.62221	6.17388	11.1966	6.91352	4.72099	4.82719	6.43119	5.00807	6.91198	5.51323	8.89528	8.35124	5.89678	4.70591	7.88568	6.36588	5.1151	6.42254	5.52925	8.46184	5.79826	10.1812	6.53915	7.42519	4.97848	7.96137	4.80824	6.63366	7.21999	8.66248	5.65217	8.06714	9.43783	5.00704	8.18795	7.29666	7.12368	7.0757	8.44321	6.88625	7.92356	7.28607	7.73257	6.61639	4.45787	5.18761
FCRLB	4.35583	4.39465	5.38969	4.15875	4.10441	4.79136	4.50915	3.22793	4.14561	4.66456	4.63905	3.84421	4.67904	4.91117	4.32537	4.53857	4.06167	5.22687	4.29847	4.16575	4.33271	4.90374	4.25471	4.60494	5.30537	4.04554	5.55315	4.55436	4.61861	4.16981	4.55545	3.91204	4.96085	4.44419	5.40375	5.12106	4.29682	4.48605	4.43041	4.21257	4.57365	4.87979	4.6836	4.72559	4.64901	4.97013	4.69559	3.22793	3.98273
FFAR2	7.64554	7.84175	8.47389	6.56255	6.55264	7.20878	5.47143	7.85885	5.76469	5.82053	8.24329	7.63535	6.5233	9.5436	6.56374	6.57118	8.02659	9.68611	6.34175	8.10708	5.87713	8.89513	5.8907	5.18617	7.77134	6.42135	10.4416	8.67682	5.95988	8.61055	6.0177	5.68295	5.82714	7.9567	7.82444	7.24019	8.38328	7.23797	8.28299	8.3071	6.48059	8.27267	7.00822	6.46868	7.37466	6.24124	7.06895	7.16475	8.21636
FGR	7.08926	8.47116	8.92546	6.08562	6.9659	8.92588	7.21234	6.62903	6.90615	6.48146	7.51715	6.93275	7.23934	9.38108	7.50231	7.93473	7.56878	10.0378	7.34563	7.32807	7.32269	8.43756	7.71789	7.32577	8.43525	7.54861	10.7196	8.01714	7.34295	8.2077	7.63079	7.38711	7.56053	8.1538	8.98661	8.81349	8.17315	8.95604	8.14324	8.11962	7.86416	7.42781	7.59634	8.14623	7.51977	7.22592	8.48618	7.50927	7.52001
FIBIN	6.83743	7.97773	6.56532	3.89172	4.97242	7.06183	5.68776	5.60673	7.02009	4.66456	6.06638	5.71853	5.16478	8.02768	6.92299	7.50046	6.27914	6.01216	6.26677	7.07629	8.27224	7.05834	5.06336	5.18617	5.16055	6.93156	8.26937	6.66386	6.12325	6.98864	5.96127	6.39638	5.46442	7.43131	8.44802	7.0285	6.39993	6.06066	7.42801	6.93496	6.03525	6.94183	7.00822	4.66672	7.27588	5.33129	5.6356	5.34654	5.59719
FJX1	4.35583	4.74315	5.26987	4.4444	4.34855	5.37804	4.14827	4.40392	4.34294	4.15834	4.39454	4.0931	4.16814	7.12296	4.32537	4.30972	4.29485	5.97315	4.52521	4.96862	5.00717	5.66387	4.89813	4.66165	4.29022	4.86375	6.13205	5.345	4.98331	5.3731	4.79327	4.48012	4.73349	4.72945	5.60058	5.12106	5.05872	6.03958	5.05928	4.81189	4.67351	4.74827	5.00665	4.6045	4.90901	4.62407	4.93839	4.55024	4.94256
FMN2	4.1102	5.89011	4.98983	7.10015	4.97242	4.60959	6.14447	4.49271	7.63399	9.23233	4.63905	7.46109	4.27471	5.11027	9.08181	6.89714	4.89368	6.03125	5.40307	5.1151	5.39333	4.56891	5.76134	5.28846	4.29022	4.27454	4.56175	4.44544	7.606	4.43048	7.65715	5.10577	7.72908	5.10198	4.02876	4.70819	4.77471	5.36716	4.94624	4.51301	4.84975	4.94039	4.82376	8.05427	5.60505	7.89967	8.12022	4.78728	4.36448
FOXP3	5.09795	6.78297	6.71875	4.03744	4.91091	6.84496	5.08306	5.02149	5.91672	4.72907	4.4827	5.2176	4.864	6.77691	5.8817	5.02699	4.56057	7.31137	5.70476	5.78329	5.84776	5.29754	6.52401	4.71558	7.09555	5.57919	6.78587	5.11292	4.98331	5.26774	4.98996	4.95071	5.53211	5.99491	7.79904	6.92721	7.22389	6.94622	6.20664	5.88795	6.27555	7.14243	6.16387	6.67943	5.49996	5.2382	6.72207	4.98337	5.07116
FPR1	5.34616	7.71954	7.30626	5.2733	7.13483	6.59974	5.56846	5.64002	5.2073	5.45843	5.55628	5.56249	5.84299	9.59584	6.18014	7.66681	5.85736	10.632	6.75995	5.66791	6.36236	8.12547	7.08809	5.47153	6.63413	6.73487	11.7171	7.88495	6.05558	6.65266	5.93217	6.01351	6.615	6.84342	8.53513	6.99553	7.39106	8.0908	7.23171	6.53358	6.43206	6.62672	8.11198	7.85633	6.23995	6.07054	6.86058	7.37913	8.49361
FPR2	3.95196	5.80694	5.56782	4.15875	5.33392	5.21137	4.50915	3.22793	4.64575	4.15834	4.63905	3.84421	4.04567	8.12581	4.55714	6.27423	4.56057	9.43189	5.0096	4.45333	4.94926	6.82789	5.20901	4.2617	4.1016	4.80537	10.4372	5.58665	4.75352	5.15294	3.74481	4.29525	4.66882	4.79046	6.18628	4.57672	5.37077	5.21917	5.25845	5.10126	5.61682	5.57558	7.12058	6.37471	4.49169	4.77526	4.99199	6.39212	7.69499
FUT7	5.15164	5.54784	5.42729	3.22793	4.62598	5.74053	3.88413	4.49271	4.24982	4.79008	6.36367	5.6685	4.67904	5.06345	4.55714	4.30972	4.9501	6.19226	4.52521	5.47382	4.82424	5.06642	5.54072	4.76702	6.7819	4.16799	5.44577	3.22793	4.54429	4.0014	5.04895	4.56106	5.10682	4.52308	4.77504	5.43003	4.70854	5.53124	5.47044	5.20024	5.00277	5.57558	4.88791	5.64663	4.71981	4.84388	5.2297	4.35606	4.43876
G0S2	8.00539	7.03645	8.47816	8.09155	6.07374	7.71526	7.16336	6.83852	7.30688	8.05242	7.97901	8.19756	5.67317	9.28769	8.63903	7.19897	8.51551	9.86355	6.0446	7.16178	5.78707	7.50205	7.37393	6.70145	7.32086	5.02337	10.1968	6.18472	7.72499	7.95824	6.87857	6.3199	7.26834	7.75549	6.56713	6.44594	6.8972	7.24704	8.07102	7.47697	5.07258	7.19975	6.70545	6.67943	7.44905	6.28641	7.34783	6.18948	6.83502
GABRA5	3.74255	3.65025	3.70941	3.22793	3.22793	4.10438	3.22793	3.22793	3.69253	3.22793	3.9135	3.22793	3.70423	4.04126	3.22793	4.00161	3.22793	4.17787	3.77233	3.22793	3.7316	3.91627	3.82898	3.83318	3.85035	3.22793	3.22793	4.01134	3.903	3.22793	3.74481	3.71391	3.22793	3.8916	3.22793	3.69207	3.91307	3.68506	3.22793	3.72736	3.79382	3.93271	3.22793	3.67811	3.22793	3.22793	3.71007	3.22793	3.22793
GAS1	5.55434	6.56421	5.35097	4.15875	3.94715	6.42925	4.43101	5.17136	5.32447	5.00639	4.83819	4.62859	4.4564	5.50266	6.08077	4.78166	5.44399	5.97315	4.16016	5.47382	5.69062	4.64443	5.02411	4.60494	5.60944	4.67882	6.5223	5.96896	5.13073	5.87317	5.74325	5.8305	6.13471	5.68183	4.88724	5.6216	5.44759	5.00593	5.34744	5.29204	5.47599	5.80589	5.26131	4.6045	5.57093	5.28559	4.82335	4.45787	4.43876
GBP5	8.80565	8.98114	9.80231	7.55337	8.41692	9.8754	8.66539	8.81182	8.15988	7.96183	9.16421	9.13194	9.64903	12.3085	8.73208	9.19064	7.84982	11.2128	8.77163	8.85307	8.69022	10.7515	9.11149	8.0647	10.4605	10.3951	12.376	10.1275	8.21091	9.06538	7.61294	8.12526	9.74134	9.19136	9.82056	8.99599	11.0188	10.2295	9.43699	9.32212	9.63554	11.061	10.4474	11.9028	9.16629	8.49108	9.8613	8.35334	8.23325
GCSAM	6.51212	6.83535	8.25739	5.00712	5.50233	8.25324	6.35322	6.62903	5.70999	5.7938	6.9629	5.83608	5.9455	6.9304	7.16251	5.64683	6.37674	7.34925	6.13212	6.77042	5.51274	6.86898	7.16508	5.72959	7.97833	6.66275	7.52983	7.03696	6.57159	6.9242	6.4432	6.79859	7.43889	7.37964	6.97331	7.48901	7.61411	7.07424	7.50325	7.20388	7.26639	7.81957	5.58611	6.37471	7.15874	6.58559	6.35926	4.71378	4.69126
GDF7	4.24166	3.82309	5.60075	3.69935	3.7391	4.91086	4.34612	3.91921	4.24982	4.26388	4.18877	4.68614	4.27471	4.91117	4.40884	3.86212	4.47966	4.41737	4.71074	3.8968	4.43264	4.39909	4.89813	4.34078	4.44596	4.36971	4.48078	4.65299	4.46425	4.16981	3.9551	4.06199	4.6001	3.8916	4.02876	4.42648	4.06324	4.23388	4.21883	4.32375	4.57365	5.05314	4.43227	5.11251	4.96585	4.5398	4.05552	4.45787	3.84652
GFPT2	5.89315	6.69494	6.318	4.66517	5.24075	6.70296	5.43744	5.07349	5.62356	5.65163	5.91654	5.2176	4.67904	6.85572	6.93428	5.94171	5.28571	7.55763	5.40307	5.28697	6.44204	5.49336	6.56268	5.03542	6.21399	5.67283	7.18978	5.75267	6.36522	5.87317	6.59757	6.06163	6.75827	6.36186	6.87907	6.34408	5.48438	6.27357	6.08764	5.70637	5.52461	5.74399	7.02115	5.96343	6.32235	6.39335	6.28195	4.11038	4.69126
GJA4	6.30517	7.6514	5.56782	4.9566	5.28818	7.29679	5.56846	5.90766	6.00946	5.38721	5.55628	4.89075	4.80561	6.22177	6.51925	5.64683	6.10726	7.76777	5.35375	5.83751	6.188	5.84353	6.2977	4.9525	6.63413	5.64234	7.68133	6.51399	6.40178	6.76757	6.0177	5.98881	6.59985	6.21053	7.06171	6.74052	6.34292	6.53493	6.54908	5.83007	5.13864	5.67913	5.9052	5.19267	6.17481	5.33129	6.26193	4.11038	4.28386
GLT1D1	3.95196	4.74315	4.28571	3.89172	3.94715	4.2589	3.69391	3.91921	4.98397	5.10154	3.22793	4.89075	3.70423	5.66211	5.00547	4.30972	3.71372	7.12294	3.22793	4.04357	4.60671	4.56891	4.3333	3.22793	3.85035	3.89843	7.43421	3.78525	4.68812	4.43048	4.64059	3.91204	5.15188	4.03729	4.93956	4.02514	4.29682	4.48605	4.52097	3.72736	3.79382	3.93271	5.06192	4.83484	3.71863	3.94612	4.05552	4.11038	4.74612
GNG8	3.95196	3.82309	3.70941	3.89172	3.22793	4.83257	3.22793	3.22793	3.69253	3.22793	3.22793	3.84421	3.22793	3.22793	3.87157	3.67816	4.06167	3.83514	3.77233	3.8968	3.7316	3.22793	3.65446	3.22793	3.85035	3.22793	4.18726	3.22793	3.22793	4.0014	3.22793	3.91204	3.22793	3.22793	3.88455	3.69207	3.91307	3.22793	3.22793	3.22793	3.79382	3.72874	3.73144	3.22793	3.22793	3.73836	3.22793	3.74266	3.22793
GP1BA	3.95196	4.83833	6.61311	3.89172	4.70423	9.10288	5.32982	4.19663	4.34294	5.2725	4.18877	4.74084	3.89854	7.50238	6.21799	4.00161	3.22793	6.76673	4.41842	4.27206	4.2207	4.48756	6.26667	4.34078	7.73575	4.16799	5.68406	4.55436	5.17622	4.53823	4.79327	5.00462	5.56471	4.44419	4.8325	6.91549	5.40974	6.19985	5.54649	5.99688	6.55039	6.24299	4.75585	6.88564	5.1699	5.13779	4.28711	4.71378	3.98273
GPR176	6.86771	8.00981	7.09929	5.00712	5.57911	8.83865	6.69589	6.81042	6.41511	6.43119	6.15797	6.13823	5.9455	7.26411	7.56882	7.18071	6.87928	8.38136	6.81326	6.59641	7.94042	6.82789	7.03436	5.60676	7.73575	6.70646	8.80144	7.90215	7.12183	7.0503	7.32562	6.96996	7.79	7.23199	7.23315	7.12309	7.305	7.57679	7.12842	7.27983	7.3465	7.69783	6.73723	6.65308	7.29619	7.63251	7.71801	5.152	5.67606
GPR84	3.74255	5.49484	4.88022	3.22793	4.44976	5.05354	4.02825	3.91921	4.57798	4.79008	3.71496	3.97993	4.04567	6.40887	4.55714	5.53227	3.91177	7.06941	4.71074	4.36703	4.33271	5.11617	5.27598	4.17486	4.29022	4.67882	7.09046	5.17504	5.26257	5.42273	5.35414	4.89427	5.23742	3.8916	4.98969	4.50436	5.1083	6.2914	4.68141	5.24696	5.37302	4.59934	5.54963	6.18417	4.19583	5.61303	4.47072	5.3006	6.09115
GRAP	7.06338	7.3625	8.20164	5.65254	6.17388	9.70342	6.76343	6.85237	6.27409	6.39665	7.34556	6.74573	6.29318	8.41164	7.73244	6.46891	7.23968	7.55115	6.07439	7.43482	6.8293	7.45802	7.46458	5.8422	9.14433	7.19885	8.05272	7.72008	6.4549	7.5644	6.7695	7.01879	7.48879	7.63592	7.57034	8.56403	7.81406	7.25606	8.01436	7.84107	7.4468	7.85559	6.34097	6.83974	7.59538	6.68952	6.53577	5.83225	5.32788
GRAPL	3.95196	3.82309	3.70941	3.69935	3.7391	4.01419	4.02825	3.22793	3.22793	3.22793	3.22793	3.22793	3.22793	3.22793	3.22793	3.67816	3.91177	3.65887	3.77233	3.8968	3.9367	3.22793	3.22793	3.96656	4.1016	3.22793	4.29582	4.18178	3.70743	4.16981	3.74481	3.22793	3.22793	3.8916	4.2534	3.88156	3.71465	3.22793	3.73063	3.72736	4.02325	4.32666	3.93648	4.00154	3.71863	3.73836	3.22793	3.74266	3.22793
GREM1	8.4455	12.8872	9.55606	7.92756	9.8223	12.5864	7.2965	7.89922	10.9129	9.93616	7.5508	8.80788	7.89407	11.26	11.826	7.2869	8.23629	12.6172	8.3075	8.10708	12.1921	7.78456	10.8116	7.52296	10.3784	8.70108	11.1373	6.06556	11.3689	9.50675	11.1638	10.1123	12.2566	10.1582	10.8285	11.8543	9.59082	10.292	8.55852	9.4679	11.681	10.3474	8.92665	8.97515	10.607	11.6754	10.8706	8.29358	10.725
GSDMC	3.22793	4.69238	4.05441	3.89172	3.94715	4.18521	3.88413	3.22793	3.69253	3.22793	3.9135	4.56781	3.89854	4.6716	3.68492	3.22793	3.71372	5.47771	3.77233	3.22793	5.00717	3.71694	3.22793	3.22793	4.1016	3.70415	6.19797	4.32303	3.22793	4.0014	3.74481	4.29525	4.16122	3.69926	5.47267	4.8803	3.91307	4.80355	3.73063	4.08466	4.33929	4.21521	5.26131	4.39201	4.06996	3.22793	4.28711	4.11038	3.84652
GTSF1L	3.22793	3.22793	3.22793	3.22793	3.22793	4.01419	3.22793	3.22793	3.22793	3.22793	3.22793	3.22793	3.22793	3.22793	3.68492	3.22793	3.22793	3.65887	3.22793	3.22793	3.22793	4.06711	3.22793	3.22793	4.29022	3.22793	3.22793	3.22793	4.28151	3.22793	3.22793	3.71391	3.70064	3.8916	3.69422	4.24884	3.22793	3.68506	3.22793	3.22793	3.22793	4.32666	3.22793	3.22793	3.22793	3.22793	3.22793	3.22793	3.22793
GUCY1A3	8.90331	9.99738	8.34886	6.08562	7.22966	9.94698	7.2965	8.07396	8.38825	6.56147	7.94149	7.49628	6.73527	8.89528	8.00727	7.05601	8.09617	8.39587	7.60837	8.38461	9.0362	8.5168	7.757	7.12337	8.59586	7.31583	8.39451	8.51865	8.09431	8.81443	7.94782	8.20622	7.87368	8.53385	8.19428	8.21062	8.12384	7.81464	8.34554	8.84101	9.0646	8.43847	7.63878	7.0953	8.74831	9.18073	7.74673	6.14016	7.08912
HAMP	4.24166	4.06385	4.54942	3.22793	3.7391	4.01419	3.22793	3.91921	3.8822	3.22793	3.71496	3.66535	3.22793	5.35966	3.68492	3.22793	3.22793	4.66602	3.22793	3.70299	3.22793	4.19258	4.07201	3.96656	4.58046	4.16799	5.32884	4.01134	4.1743	3.22793	4.11399	3.91204	4.0396	4.03729	4.58258	4.14473	4.06324	4.32568	4.09015	4.5958	3.22793	4.21521	4.33237	3.86205	4.30527	3.22793	3.71007	3.95211	3.22793
HAPLN3	5.89315	6.76147	7.03088	5.89868	6.12471	8.30625	6.03817	5.53757	5.81727	5.31188	5.80673	6.25949	5.4788	9.69852	6.64874	6.46891	5.24291	9.68905	6.01415	6.05802	6.5357	7.19361	7.48471	5.65725	7.55691	6.69204	9.12399	6.64339	6.43742	6.06775	6.38067	6.46893	6.90079	5.94745	7.79262	7.72792	7.47226	7.66729	6.418	6.79367	6.72127	7.25486	7.14439	8.85703	5.90585	5.9054	7.13579	6.67603	7.28867
HAS1	3.22793	4.39465	3.22793	4.03744	3.94715	3.22793	3.22793	3.22793	3.22793	3.89142	3.22793	3.66535	3.22793	4.26915	3.68492	3.22793	3.22793	4.60915	3.77233	3.22793	4.09179	3.71694	3.82898	3.22793	3.22793	3.22793	4.06245	3.78525	4.46425	3.22793	3.22793	3.71391	3.89351	3.8916	5.08414	4.64444	3.22793	4.01328	3.73063	3.22793	3.22793	3.22793	4.75585	3.22793	3.22793	3.73836	3.71007	3.22793	3.667
HCAR2	6.47309	6.43388	6.94668	4.15875	5.46221	5.11908	4.71363	6.43953	5.59347	4.35817	6.67181	4.56781	4.7441	8.7145	5.00547	5.07058	7.29016	9.06751	5.49647	8.29791	4.68404	7.77742	4.98357	4.07783	5.71395	5.07222	10.3037	7.83206	4.28151	8.34877	4.64059	4.29525	4.73349	6.90584	6.44025	5.16403	7.21342	6.23719	7.01707	5.83007	4.57365	7.40851	5.87645	5.50184	6.1524	4.62407	4.55112	6.14016	7.85094
HCAR3	5.20313	5.92988	5.18329	4.26433	5.0868	4.18521	4.43101	5.38737	5.32447	5.2725	5.33175	5.06499	4.6099	8.22752	4.32537	5.11268	5.85736	9.85439	4.52521	5.20395	3.7316	6.46579	4.89813	4.07783	4.44596	4.60968	10.3743	6.29449	4.05108	6.39041	3.74481	4.18675	4.90801	4.90358	5.71733	4.57672	6.08843	5.43527	5.95747	5.10126	3.79382	6.22075	5.988	6.0272	4.64901	4.70224	4.17937	6.58758	8.75845
HLA-DOB	5.62924	5.98745	7.58552	4.72971	5.72059	8.03501	5.74367	5.21758	5.07818	5.23187	5.00807	5.50616	4.4564	6.90594	6.48878	5.23109	4.89368	6.87492	5.07393	5.43853	5.62227	5.25457	6.21879	4.41367	7.68689	6.42135	7.52983	6.83585	6.4549	6.15567	5.93217	5.51725	6.91307	6.56211	7.21402	7.95566	7.34389	7.16325	6.33724	6.47901	6.81848	7.05811	6.14007	6.98382	6.38111	6.09624	6.58469	4.45787	4.0963
HLA-DPA3	3.22793	3.65025	4.28571	3.22793	3.7391	4.79136	3.88413	3.22793	3.22793	3.22793	3.22793	3.66535	3.22793	3.89488	3.22793	3.86212	3.22793	4.91378	3.99339	3.8968	4.09179	3.71694	3.96147	3.22793	4.69975	3.89843	4.06245	3.22793	4.1743	3.22793	3.9551	3.91204	3.70064	3.69926	3.88455	3.69207	4.48193	4.68737	3.93534	4.21257	3.22793	3.22793	3.22793	3.22793	3.22793	4.23364	3.90668	3.95211	3.98273
HMGCS2	11.4416	14.6425	13.1378	15.0099	15.2296	12.7503	15.5085	12.9212	15.534	15.7702	12.797	15.0814	16.7275	9.08326	13.0127	14.806	12.227	10.5181	15.4559	11.1971	14.2881	10.7267	13.5165	15.4527	11.3836	15.8696	11.3416	13.1003	13.9605	11.5661	13.3312	15.1292	14.1431	12.0064	13.0573	13.9389	12.2598	14.6513	11.4913	11.0873	15.2082	8.87348	14.5814	11.4229	13.0055	14.2733	11.7347	15.3007	14.9358
HPCAL4	4.35583	4.32281	4.69373	3.22793	4.10441	6.02613	4.14827	3.71905	3.22793	3.22793	4.18877	4.19176	3.89854	5.01478	4.68698	3.67816	4.70591	5.29428	4.16016	3.8968	3.7316	3.91627	4.47317	3.65746	6.06654	3.89843	4.18726	3.22793	3.903	4.16981	3.74481	4.06199	4.16122	4.26415	4.2534	4.57672	4.70854	4.13119	4.68141	3.9308	4.46333	4.21521	3.22793	4.00154	4.64901	4.5398	4.47072	3.22793	4.0963
HS3ST6	3.95196	4.15938	3.70941	3.22793	3.7391	3.62469	5.21244	3.22793	5.96387	6.84276	3.71496	4.19176	3.70423	3.70161	7.09377	6.34216	3.22793	3.65887	3.99339	3.22793	3.22793	3.71694	4.16842	4.86343	3.85035	3.22793	3.22793	3.78525	4.98331	4.0014	4.79327	4.39212	4.36161	3.22793	3.22793	4.02514	3.22793	4.13119	3.73063	3.72736	3.22793	3.22793	3.73144	3.22793	3.71863	3.73836	3.71007	3.74266	3.84652
HSD11B1	5.80008	5.94934	5.9437	5.49351	6.02082	5.63744	4.71363	4.96718	5.79123	5.1465	5.05977	5.18115	5.16478	5.90885	6.93428	6.12758	5.24291	8.93472	5.54081	5.32655	5.39333	5.84353	6.52401	5.07486	5.30537	5.54646	8.15427	6.06556	7.55871	5.64628	6.65137	6.33941	7.03034	5.87304	6.48917	7.0176	5.65444	6.06066	5.6867	5.37772	5.86073	6.30765	6.96871	7.88473	5.46299	6.9484	7.09158	4.45787	4.43876
HSF5	3.22793	3.95433	4.62399	3.69935	3.94715	5.50227	4.34612	4.07066	3.8822	4.03708	3.22793	3.84421	3.22793	4.44996	3.87157	3.86212	3.71372	4.72008	3.22793	4.27206	3.9367	3.91627	4.59591	4.17486	5.23502	4.16799	3.71418	4.32303	4.61861	4.16981	4.24597	4.06199	4.44755	4.03729	4.02876	4.50436	4.06324	4.01328	3.93534	3.9308	4.1961	3.93271	4.22038	4.39201	3.71863	4.44807	4.17937	3.22793	3.98273
HTR3A	4.1102	3.65025	5.72494	3.22793	3.7391	5.87285	4.25275	3.22793	4.02592	4.03708	3.71496	3.97993	3.89854	4.44996	4.68698	4.11787	4.56057	5.26102	3.22793	4.16575	3.22793	4.19258	4.47317	3.65746	5.857	4.16799	4.63692	3.78525	4.68812	4.88556	4.11399	3.91204	4.6001	4.79046	3.88455	5.32268	4.48193	3.68506	5.05928	4.08466	3.79382	3.72874	3.73144	4.21905	4.84931	3.22793	4.05552	3.74266	3.84652
ICOS	6.0355	7.19682	7.74309	4.4444	6.14951	8.4691	6.48764	6.56302	6.11728	5.18991	5.55628	6.50265	5.84299	7.47778	6.80484	5.85032	5.77258	7.87535	6.0446	6.5809	5.65688	7.09338	7.01599	5.55431	8.56918	6.48986	7.65845	7.29382	6.36522	6.21134	5.48329	5.93804	7.42186	6.90584	7.69269	7.76088	6.97377	7.19173	6.66903	6.85188	7.22458	7.23307	6.67295	7.57884	6.3022	6.47342	7.29038	5.3006	5.67606
IDO2	4.45763	4.4615	5.09033	3.22793	3.94715	4.9843	4.02825	4.40392	4.24982	3.69914	3.71496	4.28003	4.16814	4.96409	4.40884	4.11787	4.63568	5.89166	4.52521	4.27206	3.7316	4.71503	4.89813	3.83318	4.1016	4.4562	5.68406	4.74343	4.28151	4.53823	4.86255	4.56106	5.65797	5.31236	4.77504	5.07655	5.28912	5.2578	4.6042	4.32375	4.46333	4.8159	4.22038	6.67943	5.02012	4.10316	4.62577	3.95211	3.667
IGFBP5	11.8676	13.2208	12.1072	9.71293	11.2659	12.2107	10.105	11.4836	12.1369	10.2595	11.65	10.1863	9.84446	12.1943	12.1628	10.5443	11.0185	12.1186	10.9739	11.922	13.0611	11.1516	10.6712	9.46085	11.1234	11.6724	14.3623	12.4047	12.024	12.6102	11.3405	11.5347	12.5131	12.4702	13.9418	12.815	12.6644	12.4646	12.2586	12.1283	12.8811	12.5766	13.4029	10.4178	12.0981	12.3281	13.5518	9.63241	10.8076
IGHD	5.51525	8.3583	7.31586	4.52331	4.44976	8.79064	4.83154	6.94569	4.70955	4.84799	4.39454	4.8429	4.4564	6.49384	6.14124	4.53857	4.18638	7.75655	4.29847	4.96862	4.75631	4.71503	7.77344	5.82041	9.66238	4.86375	6.74278	4.32303	6.24946	4.43048	6.0177	5.88532	7.07468	5.38771	6.2255	9.79318	5.65444	8.99948	6.8097	5.94349	6.35598	4.94039	5.11482	5.75218	6.5268	5.41812	7.38488	4.55024	4.50785
IGHD3-3	3.95196	5.19189	3.90576	4.03744	4.10441	4.65791	4.34612	3.71905	4.02592	3.22793	4.06377	4.68614	4.36989	4.60277	4.80313	4.39212	3.22793	4.17787	4.52521	3.70299	4.09179	3.71694	4.16842	3.96656	4.29022	4.60968	5.68406	4.32303	5.17622	4.43048	4.79327	4.56106	4.52664	4.35846	5.25392	5.24582	4.77471	5.53124	4.43041	4.67261	4.67351	4.94039	4.52295	3.86205	4.19583	4.10316	5.04332	3.74266	3.22793
IGHG1	11.9411	15.4153	14.3085	11.0758	12.2106	14.8602	11.9926	11.9789	12.4586	13.0619	11.6266	12.464	10.8732	12.5461	14.3719	10.6137	9.8713	14.0335	10.5136	11.2008	12.4548	12.0028	14.0456	12.1327	15.0364	13.715	13.833	10.1366	14.2212	11.7972	13.4987	12.2826	14.2062	12.9827	16.2323	16.1052	15.5514	18.2447	12.8619	14.2047	16.1176	15.0115	13.4684	14.2082	12.9105	15.1826	14.697	12.6017	10.6895
IGHG2	9.66432	12.3631	13.0984	10.3759	11.4731	12.6343	10.7797	8.69068	9.47483	9.19309	10.4848	11.8849	11.0859	10.7367	12.5158	9.52565	8.74209	11.679	9.59486	10.9858	13.002	10.6854	12.4517	11.7436	13.0594	12.4057	14.3108	9.41479	12.6633	12.1522	13.3398	13.2802	13.2407	10.1645	12.4646	12.3973	13.5001	16.6749	11.3007	11.1251	12.5265	14.6702	13.1611	14.4387	11.1491	11.7522	13.8777	9.95855	10.2142
IGHG3	7.66284	11.5616	10.2445	7.41477	7.90358	10.9062	8.16796	7.53061	8.02508	7.92033	7.60785	7.68498	7.63403	9.34082	9.21898	7.04595	6.72581	10.9366	7.55746	7.7284	10.1621	7.21496	9.59515	7.95207	13.0422	10.0232	9.75346	6.58017	10.1673	7.71435	9.62218	8.70286	10.5136	8.96824	13.0896	12.698	11.055	13.718	10.0098	8.65861	10.7344	10.6381	10.3539	10.9696	10.0683	10.5057	10.4072	8.65475	9.2355
IGHG4	7.45012	9.03774	11.7082	8.18468	9.07462	12.542	7.97768	5.76551	6.19789	6.60739	5.24741	5.56249	5.40713	9.09676	12.015	7.44043	7.92188	11.1005	7.90554	6.22831	5.9887	9.06874	10.4534	8.35405	11.9264	12.4882	14.1728	8.71622	11.8471	9.58138	8.95145	8.88099	11.4604	6.90584	9.65727	9.31025	7.86833	11.049	10.1478	9.49763	10.9446	12.7635	9.63181	11.7746	9.41326	8.7711	12.1198	7.43059	7.2476
IGHGP	5.2526	8.25507	7.19615	5.8477	6.3118	6.64194	5.17077	4.65014	4.64575	5.35009	6.43819	7.22957	5.9455	5.69185	7.02155	4.78166	4.70591	8.86082	5.49647	5.86383	6.51746	4.71503	5.4296	5.44274	9.05585	8.62025	8.66292	5.79118	9.3799	7.00431	8.30501	7.28122	9.27949	4.95631	6.58222	6.90368	9.06133	12.3238	7.90779	6.6201	8.27833	9.48492	7.5526	8.1321	5.53592	7.01637	7.19964	6.00864	5.02978
IGHV1-17	3.74255	5.00823	4.88022	4.03744	4.62598	4.50581	4.50915	3.71905	3.69253	4.35817	4.39454	4.28003	4.16814	4.60277	4.80313	4.66685	4.29485	4.26497	4.52521	4.45333	4.09179	3.91627	3.96147	4.07783	4.44596	5.92023	4.83581	3.78525	4.54429	4.80824	4.46276	4.77254	5.4987	4.35846	5.85039	5.03038	4.48193	5.40166	4.8214	4.42295	5.13864	5.5392	5.11482	4.6045	4.49169	4.34699	5.04332	3.95211	3.84652
IGHV1-24	8.56972	11.3949	10.3237	6.66748	8.1227	8.65423	9.13407	7.12722	7.3247	6.84276	8.32807	8.33199	8.39183	9.88269	10.7413	9.62145	6.9936	9.16601	9.77017	9.54786	7.26956	9.66535	9.01124	7.92248	10.4821	11.6536	9.92911	7.51154	10.6994	8.17362	8.97604	9.16891	9.37522	8.01421	10.506	9.31469	9.43123	10.1218	8.3353	9.58118	11.7165	9.58687	8.82024	7.55782	8.92444	9.76018	10.4448	7.31483	5.70135
IGHV4-34	9.85659	11.8616	11.5172	9.02576	9.63657	11.258	11.3895	8.04427	9.64699	8.9051	8.54359	10.0747	10.7195	9.24712	11.8324	11.2067	9.75435	10.6111	11.3929	9.97123	10.4412	7.82668	9.11149	8.49799	11.1905	13.2174	12.4006	10.1742	12.5682	9.96661	11.6481	11.6025	11.0917	10.4861	14.0888	12.9668	10.189	12.1849	9.94573	9.14266	11.4324	13.0748	11.5256	10.7429	9.85474	10.9787	12.831	8.4056	8.61772
IGLV1-40	11.2593	12.9556	13.0727	11.3486	11.9574	11.6712	12.5195	9.70249	12.272	11.237	10.701	11.981	12.864	10.847	13.2962	12.9646	10.0629	12.4089	12.8242	11.0175	10.9419	11.048	11.2462	10.8535	12.3743	13.9677	13.4773	11.292	13.3891	11.7792	12.7422	13.3949	12.5775	12.0568	13.8805	13.4402	13.3021	14.4947	12.2986	11.5714	13.7086	14.1407	12.379	12.538	10.1484	11.896	14.5664	9.66277	9.78002
IGLV1-47	10.0978	12.5322	12.5237	10.0815	10.7794	10.3649	11.2765	9.19592	10.6767	9.95388	9.8934	10.9609	11.6972	9.91199	12.5365	12.569	9.36374	11.055	11.7943	10.78	10.1253	9.7928	10.4431	9.94278	11.4636	12.6424	13.3612	10.5772	12.1417	10.9937	12.6874	13.0707	11.9952	11.5239	12.1922	11.8611	12.3538	13.1649	11.5186	10.0433	12.0278	13.1336	11.5329	12.253	10.8246	11.4366	13.7357	8.69309	8.18633
IGLV9-49	6.23664	7.3265	7.51231	4.4444	5.57911	7.01463	6.75018	5.46461	5.68179	5.59029	5.86274	5.38573	6.25417	5.83146	6.77999	6.08838	5.58524	8.91219	8.3795	6.51709	6.188	8.07978	8.11609	6.28266	8.36718	9.36949	8.70812	6.34632	9.71905	6.09768	7.62189	7.28122	6.17651	6.75117	9.4771	9.3345	6.36218	8.26567	8.01436	6.79367	8.14316	9.12999	7.27951	7.48543	4.90901	4.5398	8.01209	5.25297	4.79844
IL11	4.24166	4.92631	4.05441	4.15875	4.10441	4.01419	3.88413	3.91921	4.34294	3.89142	3.9135	4.19176	4.04567	3.89488	4.13093	4.30972	3.71372	3.96894	4.52521	3.8968	4.33271	3.91627	4.07201	4.34078	3.22793	4.04554	8.17589	3.78525	4.46425	3.22793	4.55545	4.18675	4.52664	4.44419	4.8325	4.42648	4.06324	5.67725	3.93534	3.72736	4.02325	3.93271	8.62333	4.39201	4.06996	4.44807	3.71007	4.45787	4.0963
IL12B	3.95196	3.82309	4.3818	3.89172	3.94715	4.74861	3.88413	3.71905	3.22793	3.22793	3.22793	4.28003	3.22793	5.77732	4.13093	3.22793	3.91177	4.48538	4.29847	3.70299	3.7316	4.56891	4.47317	3.65746	5.16055	4.04554	5.77453	4.18178	3.22793	4.0014	4.71954	3.71391	4.26706	4.66492	3.88455	4.76848	4.70854	5.1382	4.33065	4.21257	4.02325	4.8159	4.09152	4.98164	4.30527	4.5398	3.71007	4.11038	3.667
IL13RA2	4.24166	4.58323	4.82136	6.4989	6.43736	5.11908	4.88626	4.07066	4.57798	4.52275	3.71496	5.02372	4.6099	4.04126	4.55714	4.78166	4.39169	7.93126	5.24909	3.8968	4.8884	4.71503	6.1178	5.25526	5.08139	5.11921	9.72076	4.97848	6.24946	4.53823	5.30809	5.44473	5.59652	4.03729	7.36906	5.6216	4.06324	7.44125	4.21883	4.67261	5.57151	4.21521	7.5075	5.30413	4.30527	8.13101	4.99199	4.92155	5.59719
IL1A	4.24166	4.4615	4.28571	5.97178	6.90962	5.37804	4.58175	3.22793	3.8822	4.52275	3.9135	4.68614	4.04567	6.24165	5.21866	4.46801	3.91177	7.23247	4.79296	4.27206	3.7316	4.71503	5.17415	3.22793	5.08139	4.36971	8.4037	4.01134	5.65604	4.95813	4.24597	4.18675	5.27813	3.69926	5.77212	5.12106	4.29682	6.23719	4.33065	4.21257	4.1961	4.21521	6.18728	7.70529	4.57328	4.84388	5.78582	6.14016	7.12589
IL1B	6.82205	9.64923	7.77819	10.6092	11.3399	7.74439	7.56862	6.45784	7.78937	7.96183	6.11293	7.61629	5.81612	10.5659	8.64246	7.33719	6.52006	12.0748	8.21211	7.48535	8.05765	9.32006	9.19714	5.94623	7.44374	6.10802	13.0745	8.35351	9.03094	8.65567	7.28106	6.39638	8.72614	6.28824	9.29178	7.8058	7.31482	10.0908	7.6838	7.54882	7.15208	7.43736	10.1199	10.0445	6.49177	7.88526	8.95408	9.48244	11.2554
IL1RN	7.3468	9.1672	8.69911	11.4012	11.379	8.4545	6.84045	8.26621	7.28885	7.77488	9.35919	9.52942	7.75621	9.50566	7.86764	6.51365	8.15169	11.1137	8.01515	6.14577	9.71426	8.13667	9.44099	7.34824	7.81746	7.8032	12.1909	8.86386	8.30453	6.94058	8.25418	6.5712	7.60645	9.19881	11.5542	10.9604	8.63856	9.00215	8.10758	8.9343	8.43273	6.9685	9.03211	9.66922	7.46706	10.1104	10.4161	11.1387	11.4452
IL21	3.22793	4.24491	4.17811	3.69935	3.22793	5.11908	3.22793	3.22793	3.69253	3.22793	3.71496	3.22793	4.04567	4.26915	3.68492	3.22793	3.22793	4.99985	3.22793	4.04357	3.22793	3.71694	4.3333	3.96656	5.90154	3.22793	4.06245	3.78525	3.903	4.0014	3.22793	3.71391	4.0396	3.69926	4.02876	4.50436	4.06324	4.23388	3.73063	3.22793	4.02325	4.21521	3.22793	3.86205	4.06996	3.22793	4.17937	3.74266	4.63354
IL21-AS1	4.24166	4.06385	4.28571	3.22793	4.10441	4.94814	3.88413	4.19663	3.22793	3.22793	3.22793	3.97993	3.22793	5.46834	3.87157	3.67816	3.22793	4.8683	3.77233	4.27206	4.09179	4.30169	4.59591	4.34078	5.66271	4.16799	4.18726	4.32303	4.54429	4.16981	4.24597	4.29525	4.26706	3.69926	4.43176	5.65102	4.29682	3.87176	3.93534	4.21257	4.57365	3.93271	3.22793	3.67811	3.71863	4.34699	4.05552	4.24186	3.22793
IL21R	5.95187	7.23619	7.96033	4.9566	5.9658	9.14893	6.18482	5.90766	6.23651	6.04021	5.8899	6.29228	6.50688	7.41003	6.51925	5.98523	5.65062	8.69474	5.66561	5.86383	6.29949	6.48361	7.4578	5.8422	9.15782	6.52291	7.99305	7.02125	6.47217	6.03717	5.87204	6.35866	6.74458	6.26921	7.34289	8.01149	7.58197	7.8801	6.66903	7.51334	7.55184	7.70574	6.87203	8.00857	6.47392	6.53062	7.45624	5.76802	5.59719
IL23A	4.54998	4.96797	5.31105	3.89172	4.70423	7.19475	4.34612	4.49271	4.34294	4.35817	4.77563	4.43442	4.16814	5.3969	5.09518	4.00161	4.29485	7.64541	4.52521	4.27206	3.7316	4.56891	5.1383	3.96656	6.60793	4.67882	7.17908	4.44544	4.75352	4.88556	4.86255	4.18675	5.27813	5.19037	5.33101	5.28482	5.00704	5.46804	4.88547	5.10126	4.67351	4.8159	4.33237	5.19267	4.71981	4.90868	4.76127	4.24186	4.63354
IL24	3.95196	3.65025	3.90576	3.69935	3.22793	3.22793	3.69391	3.22793	3.22793	3.22793	3.71496	3.84421	3.22793	3.70161	4.01306	3.22793	3.22793	4.72008	3.22793	3.70299	3.7316	3.71694	3.22793	3.22793	3.22793	3.70415	6.97134	3.78525	3.70743	3.22793	3.22793	3.22793	3.22793	3.69926	3.69422	3.69207	3.22793	3.87176	3.22793	3.22793	3.22793	3.22793	6.8285	3.86205	3.22793	3.22793	3.71007	4.35606	3.84652
IL2RA	7.08926	7.80041	8.62788	6.08562	7.05933	9.16157	6.7368	6.62903	6.41511	6.66638	6.7756	6.37107	6.76313	9.47293	6.96764	7.64704	6.35775	9.60572	7.51539	8.05235	7.87092	8.52535	7.74594	6.72465	8.64778	7.86198	10.5918	9.35678	7.07768	8.47164	5.63794	6.43312	7.63626	7.27035	8.95538	8.53387	8.65408	8.48794	7.11647	7.61724	8.31189	9.53457	8.16515	9.59738	7.43081	6.54918	8.54043	5.59272	6.34878
IL4I1	5.76759	6.99108	7.66271	5.87343	6.28974	8.33842	6.12385	5.50159	6.39824	6.39665	5.24741	5.83608	6.13017	9.10479	6.88856	7.07592	6.25877	8.91471	6.81326	7.19256	6.25596	7.22551	7.48471	6.2017	7.6363	6.19317	8.86269	7.15685	6.10106	8.2344	6.24657	6.30011	6.40404	6.57758	7.13481	7.00661	7.81406	8.37285	6.83916	7.01346	7.05992	7.59923	7.40297	8.37946	6.43753	6.30846	6.46779	6.43344	6.49751
IL6	4.24166	6.3639	4.46911	3.22793	5.90849	4.74861	3.88413	4.07066	4.93397	4.15834	4.18877	4.79301	4.04567	7.09081	5.36663	4.00161	4.18638	7.26455	4.79296	4.27206	4.33271	4.78144	4.98357	3.96656	5.49608	4.04554	9.1044	4.44544	4.1743	4.16981	3.9551	3.91204	4.52664	3.8916	4.71453	5.28482	3.91307	5.62074	4.52097	3.72736	4.1961	4.32666	7.20225	6.08816	4.30527	4.44807	4.47072	4.45787	4.98696
IL8	5.59231	8.48752	6.15429	5.94784	8.32893	5.2407	5.8988	6.40216	8.46233	7.76821	4.4827	6.17396	4.36989	10.1245	8.64588	6.52826	4.89368	10.1787	7.7144	5.63745	5.2149	7.45802	6.73036	4.81623	5.60944	5.40682	12.4307	6.97303	6.7933	7.0198	6.14946	4.95071	5.97764	5.19037	8.80739	6.72716	6.24245	8.46874	6.33724	5.41853	6.35598	6.84435	10.0289	9.10857	5.02012	6.43395	7.23053	8.44108	10.0128
INHBA	5.95187	7.94017	6.15429	4.15875	6.53407	6.71289	5.17077	5.9344	5.32447	4.95589	4.89756	5.47707	4.53599	6.46046	5.8817	4.60463	4.83442	6.62498	4.52521	5.1151	7.20308	6.31441	5.97062	4.48149	5.55396	4.36971	10.8521	8.07137	5.49156	7.90934	5.74325	5.44473	5.59652	5.45894	6.79117	6.37886	6.0411	6.54976	5.47044	5.33559	5.96807	6.12809	8.57614	7.23454	5.46299	6.01765	6.55227	5.59272	6.28458
IRG1	3.22793	3.22793	3.90576	3.22793	3.7391	3.22793	3.22793	3.22793	3.22793	3.22793	3.22793	3.66535	3.22793	7.40133	3.68492	3.22793	3.71372	5.38922	3.22793	3.22793	3.22793	4.06711	4.3333	3.22793	3.22793	3.22793	8.01122	3.78525	3.22793	3.22793	3.22793	3.71391	3.70064	3.69926	3.22793	3.22793	3.71465	4.01328	3.22793	3.22793	3.22793	3.72874	5.21434	4.83484	3.22793	3.22793	3.22793	3.74266	4.98696
ITGAX	7.33604	8.79925	8.65453	5.87343	6.9239	10.2386	7.93174	6.98389	7.72387	7.19188	6.88563	7.10722	7.15806	9.03361	7.96404	7.70555	7.40452	10.326	7.81315	7.42622	8.37114	7.56151	8.12892	7.07921	8.82734	8.06458	10.831	8.63631	8.93564	8.0362	8.75022	8.60679	8.56914	9.06385	9.60517	9.00151	8.72189	9.24258	8.77466	8.41658	8.82079	8.96854	7.81932	9.39148	8.08335	8.25943	9.05783	7.66339	7.25591
ITGB2-AS1	5.89315	6.63701	7.04251	4.35866	4.62598	7.71034	5.40254	5.53757	5.16572	4.72907	5.59026	5.8804	4.80561	7.41003	6.63493	5.11268	6.06077	7.31902	6.01415	5.69769	5.81775	5.72643	6.02766	5.25526	6.82792	6.52291	7.06742	6.44456	6.43742	6.36618	6.87857	6.75593	7.62886	7.52938	7.86172	8.6261	7.57383	7.61927	7.1981	5.83007	6.50424	6.87289	4.75585	6.1079	6.45584	6.45382	6.1132	4.85634	4.50785
ITIH1	3.22793	3.95433	4.05441	3.89172	3.22793	5.18136	3.88413	3.22793	4.02592	3.69914	3.22793	3.22793	3.70423	3.22793	3.87157	3.67816	3.22793	4.34427	3.22793	3.70299	3.22793	3.71694	4.53635	3.96656	4.58046	3.22793	3.71418	4.32303	3.22793	3.77809	3.9551	3.71391	4.0396	4.03729	4.2534	4.14473	3.91307	4.68737	4.09015	3.9308	3.79382	4.51637	3.73144	4.53844	3.22793	4.34699	3.22793	3.22793	3.22793
JAK3	8.15332	8.2397	9.36875	6.3977	7.27482	10.8167	8.15303	7.95773	7.69681	7.099	7.74493	7.80203	7.7	10.1073	8.59724	7.73081	7.36741	10.4476	7.94565	8.66903	7.89212	9.17295	8.97384	7.06116	10.2791	8.69033	10.5271	9.83276	8.35146	8.57445	8.14679	8.31241	9.24128	8.64353	9.43038	10.0154	9.63055	9.05972	8.93234	8.94098	8.95848	9.47801	8.39023	9.16977	8.62969	8.17313	8.50729	7.11522	7.12589
KB-1507C5.4	4.54998	4.32281	4.98983	3.22793	3.7391	5.40385	3.88413	5.21758	4.24982	4.44387	4.39454	3.66535	3.70423	5.15539	4.01306	3.86212	4.63568	5.78248	4.29847	4.6755	4.43264	4.64443	4.16842	4.2617	4.90591	4.4562	4.89511	4.55436	4.68812	5.60447	4.36058	4.06199	4.26706	4.84839	4.50994	4.70819	4.6382	4.80355	4.21883	4.21257	4.67351	5.34059	4.22038	4.78152	4.71981	4.62407	4.47072	4.55024	5.29423
KCNE1	3.95196	4.32281	4.62399	4.4444	4.10441	3.22793	4.34612	3.71905	4.42762	4.15834	3.71496	4.0931	4.6099	4.73638	4.13093	4.66685	4.39169	4.91378	4.16016	3.70299	4.52334	3.91627	3.96147	4.41367	3.22793	4.27454	4.95157	3.78525	4.28151	3.77809	4.11399	3.71391	3.89351	4.15858	4.65055	4.24884	4.6382	4.40917	3.73063	4.21257	4.57365	3.93271	4.43227	4.00154	4.57328	4.44807	4.69559	4.55024	3.84652
KCNJ10	3.74255	4.32281	7.21681	4.4444	6.04753	8.13366	4.43101	3.91921	5.39706	5.76653	5.05977	5.25303	6.08626	5.46834	5.56118	4.83499	4.9501	7.06941	6.13212	5.16031	4.68404	5.72643	5.1014	5.22119	7.16873	5.81577	7.98082	6.42063	5.62472	4.63583	4.24597	4.63619	5.80037	4.52308	4.50994	4.57672	8.38792	7.89169	5.43071	4.08466	5.70309	8.42895	7.81192	8.68063	6.34221	5.87584	6.1132	4.35606	4.0963
KCNJ15	4.45763	5.19189	5.04111	3.89172	4.10441	4.91086	3.69391	3.71905	4.34294	4.15834	3.71496	3.66535	3.89854	6.11792	4.13093	4.53857	4.56057	8.31418	4.52521	4.36703	4.52334	5.37943	4.3333	3.83318	4.58046	4.16799	8.99622	4.44544	3.903	4.63583	4.46276	3.71391	4.73349	3.22793	5.29304	4.76848	4.77471	4.40917	4.09015	4.21257	4.67351	3.22793	5.58611	4.53844	4.40296	4.62407	4.28711	4.78728	6.03337
KEL	4.24166	3.65025	5.69495	4.26433	4.10441	7.64489	4.14827	3.71905	3.69253	4.26388	3.71496	4.19176	4.16814	5.35966	4.40884	3.86212	3.71372	4.26497	4.29847	3.8968	4.33271	3.22793	4.75709	4.41367	5.90154	4.53578	4.70721	4.18178	4.05108	3.22793	3.9551	4.29525	3.70064	4.15858	3.88455	4.70819	3.91307	4.62439	4.33065	4.7444	5.13864	4.21521	3.73144	4.39201	4.71981	4.5398	3.22793	4.45787	4.1953
KIAA1045	4.45763	4.15938	4.93628	3.89172	4.10441	6.61041	3.69391	4.40392	4.24982	4.35817	4.56378	4.28003	3.22793	5.53611	5.1377	4.21915	4.63568	5.22687	4.16016	4.6065	4.33271	4.78144	4.65231	4.07783	5.08139	4.67882	4.89511	4.44544	4.05108	4.43048	4.71954	4.56106	4.66882	5.00682	3.88455	4.76848	4.70854	4.90906	5.00407	4.87565	4.57365	4.99807	3.22793	3.22793	5.53592	4.84388	4.05552	4.24186	3.84652
KIAA1199	6.45316	6.98183	6.65935	9.54178	9.36989	8.39457	7.09184	6.2205	6.46455	6.63719	6.36367	6.72202	6.74927	8.93188	5.8577	6.48398	6.53699	9.89069	7.02365	6.91314	7.73666	6.60248	7.87343	6.15077	7.15078	6.94376	10.3614	6.29449	6.98506	6.23837	6.70321	6.58755	6.86331	6.6814	8.06181	7.34843	5.74702	7.68072	6.01101	7.14705	8.09769	6.99469	8.81656	8.68708	6.83642	7.21441	5.84154	7.84106	7.71317
KIF26B	6.72607	7.00027	6.06461	4.72971	4.62598	6.71289	5.94684	6.19878	5.68179	5.4233	6.32488	5.38573	4.6099	6.47725	5.05114	4.93485	6.45022	5.71251	5.7428	6.20813	4.75631	6.46579	4.65231	5.11307	6.49801	5.44314	7.1683	6.37153	5.52612	6.89085	5.30809	5.51725	5.27813	5.97138	6.33698	5.03038	6.32339	5.56174	5.1628	6.6201	6.35598	6.7241	5.96095	5.23092	7.07886	6.35155	5.39221	4.98337	4.63354
KLK10	5.47497	6.11315	4.75934	4.90386	5.14024	4.70419	4.71363	5.12339	5.73762	4.26388	4.95409	5.06499	4.6099	6.49384	5.43472	5.4069	5.40619	5.41938	4.41842	5.16031	5.39333	5.37943	5.30819	5.96613	4.69975	4.67882	6.69833	5.17504	5.22013	4.63583	4.92796	4.95071	4.6001	5.31236	7.55524	5.20558	5.05872	5.00593	5.25845	5.20024	4.33929	5.25181	5.988	4.21905	5.30374	5.37543	4.62577	6.03596	4.28386
KMO	5.34616	5.98745	7.13231	4.66517	5.68659	8.45156	6.40514	5.21758	5.2073	5.2725	5.99349	5.71853	5.86935	7.61192	6.60688	6.20283	5.58524	7.47787	6.43589	6.18765	5.84776	6.61867	6.04617	5.75287	8.04766	6.34934	7.40699	7.03696	6.87313	7.39694	6.19886	6.21802	6.42143	5.97138	6.87907	7.1632	6.60736	7.23797	6.49439	6.44142	6.76095	6.80044	5.39273	6.63971	6.28176	6.09624	6.67774	5.76802	6.03337
KRT23	4.63482	5.22559	4.3818	4.9566	4.77733	4.94814	5.03677	3.91921	4.24982	3.22793	4.56378	3.97993	5.36977	5.15539	4.01306	4.72573	4.77198	6.27427	4.94168	4.91559	3.9367	4.39909	3.22793	4.41367	4.69975	5.07222	7.00813	4.44544	3.70743	4.16981	3.74481	4.95071	4.0396	4.52308	4.71453	4.42648	4.39382	4.40917	5.1628	5.24696	4.84975	4.74827	5.00665	4.21905	4.78639	4.77526	3.90668	4.92155	5.14999
KRT5	3.74255	4.74315	4.05441	3.69935	3.7391	4.70419	3.88413	3.22793	4.02592	4.79008	3.22793	4.28003	3.89854	4.44996	4.23359	4.00161	3.71372	4.99985	3.77233	4.27206	3.9367	4.30169	5.1014	4.2617	4.44596	4.04554	4.63692	3.78525	5.03444	3.22793	4.79327	4.06199	5.23742	4.15858	4.02876	4.14473	3.71465	4.90906	4.09015	4.21257	4.57365	4.32666	4.33237	4.11778	3.71863	4.23364	4.99199	3.74266	3.98273
KYNU	6.41244	7.81085	7.51231	5.82147	7.44244	7.96252	6.62498	5.90766	6.49657	6.70907	6.22292	6.81458	6.42174	8.26149	6.85328	6.83999	6.25877	9.39265	7.12527	6.5809	6.70624	7.18281	7.30008	6.37401	7.79459	6.74886	9.29417	7.50027	6.88601	7.13807	6.87857	6.79859	6.97291	6.41465	9.91506	8.65791	7.19225	8.22505	6.68537	6.92144	7.25259	7.37907	8.18245	8.42654	6.67453	7.14332	7.58117	6.60572	6.76665
LAIR2	3.74255	4.63918	4.28571	3.69935	3.22793	4.55898	3.69391	4.07066	3.8822	3.69914	4.56378	3.84421	3.89854	3.70161	3.87157	3.67816	4.06167	4.8683	3.99339	4.04357	4.52334	3.71694	4.25471	3.83318	4.69975	3.89843	5.77453	4.90523	4.87403	3.22793	3.9551	3.71391	4.52664	4.15858	6.55188	4.50436	4.89658	4.74695	4.33065	4.51301	5.00277	4.51637	4.33237	4.30961	4.49169	4.77526	4.17937	3.74266	4.43876
LAMP3	7.51826	8.29651	8.76699	6.80507	7.64497	9.42972	6.88958	7.53061	7.62684	7.54439	6.8988	6.86951	6.57147	9.56317	7.69325	7.08577	7.62485	10.1776	7.3576	7.26192	6.51746	8.79628	9.04318	6.2983	9.31856	6.77644	9.95901	8.35974	7.43319	8.08103	7.88976	7.73187	7.94086	8.01984	8.66017	8.8322	8.60304	8.80812	7.6757	8.90045	8.60503	8.91158	8.36521	9.50725	7.92322	7.74859	8.30035	7.30383	7.65163
LAX1	7.40968	8.37598	8.74235	6.41508	7.41247	9.28217	8.27296	6.97127	7.13574	6.51401	7.03621	7.75635	8.22779	8.01635	8.47949	7.77398	6.65017	8.87125	8.28892	7.43482	8.03876	7.6186	7.49135	6.51422	9.12157	8.90094	9.63757	7.61959	8.38794	7.52162	7.52022	8.27287	8.40161	7.65052	9.54352	8.85981	8.36924	9.64941	7.91469	8.16026	9.26968	9.8819	8.40503	8.55212	8.04795	8.23124	9.28493	6.14016	6.43989
LCN15	6.53123	4.63918	6.44707	4.66517	4.34855	5.89075	7.89031	7.43304	5.70999	7.31621	7.24626	6.10155	8.29092	7.37492	7.31686	9.0992	7.26009	5.35834	7.11119	7.43482	6.99598	7.9776	6.73036	7.71945	5.37208	7.0603	7.33176	8.28962	7.96137	8.3365	6.99377	6.1751	6.21709	5.45894	5.25392	5.12106	6.60736	5.29529	6.63578	5.88795	4.02325	5.46331	5.11482	5.07042	5.85077	4.77526	5.5367	5.92327	4.69126
LCNL1	3.22793	3.82309	3.22793	3.22793	3.22793	3.7873	3.69391	3.91921	3.22793	3.22793	3.22793	3.84421	3.70423	4.44996	3.68492	3.67816	4.18638	4.08055	3.22793	4.04357	3.9367	3.22793	3.65446	3.22793	4.1016	3.70415	4.39274	3.78525	3.903	4.16981	3.22793	3.91204	4.0396	4.03729	4.77504	4.14473	4.18817	4.74695	3.73063	4.21257	4.1961	3.72874	3.73144	3.67811	4.06996	3.94612	3.71007	3.22793	4.0963
LEF1	6.67553	8.20054	7.74309	5.97178	6.88063	9.51938	7.01655	6.49378	6.60325	6.12766	6.59273	6.78057	6.27381	8.39862	7.53964	6.78045	6.69603	8.11801	6.99323	6.54935	7.53558	6.75666	7.39536	6.5537	9.28617	7.13657	7.82523	7.65048	7.36146	7.03513	7.08747	7.7891	7.52112	7.03423	8.32451	8.9821	7.06986	7.80853	7.11647	7.55755	8.28511	7.97173	6.79872	7.49283	6.9306	7.52495	7.37571	5.8936	6.16463
LGI2	5.34616	7.63385	6.87033	4.84867	5.68659	8.71673	5.68776	4.78761	6.99802	6.08462	5.05977	5.64277	5.16478	6.51024	7.03209	6.04804	5.05559	7.86495	5.7428	4.80181	6.78439	4.90374	7.51111	5.07486	7.35258	5.07222	6.2813	4.65299	6.41971	5.87317	6.50308	6.10813	7.53702	5.92309	6.8912	7.54311	4.6382	6.67669	5.87303	5.916	6.68044	5.97638	5.16556	6.48375	6.82244	7.39855	6.46779	5.3006	5.62399
LILRA2	4.45763	5.92988	5.26987	3.89172	4.34855	4.2589	4.50915	4.30616	5.07818	4.95589	5.00807	4.79301	4.91961	6.60481	5.591	6.22102	4.39169	6.78903	5.58371	4.80181	5.58675	5.37943	4.59591	4.71558	4.58046	5.51291	7.91159	4.90523	5.62472	5.02655	5.63794	5.61911	5.39307	4.90358	6.33698	5.7356	4.95308	5.64929	5.11212	4.7444	5.47599	4.99807	5.06192	5.15323	4.71981	5.37543	5.18563	4.55024	5.07116
LILRA3	4.71349	5.5216	5.38969	4.5966	5.50233	4.10438	4.50915	4.40392	4.88179	5.31188	4.39454	5.02372	5.25075	5.74943	4.32537	5.4069	4.29485	8.5498	4.71074	4.74043	5.72354	4.96044	5.20901	4.41367	4.1016	5.64234	9.56983	5.23424	4.81535	4.95813	5.67396	5.2436	4.52664	4.44419	6.38956	5.24582	4.06324	4.85749	4.43041	5.49654	5.42551	5.34059	6.11585	6.14656	4.40296	5.13779	5.72772	4.71378	4.43876
LILRA5	5.92282	6.04272	6.01751	5.10229	5.3781	5.40385	5.36669	5.76551	5.16572	6.12766	5.68731	4.8429	5.07249	7.92237	5.92849	6.34216	6.15226	8.3218	5.91857	6.43304	6.06683	6.88242	5.45827	4.66165	4.69975	5.92023	9.68919	7.96898	6.18778	7.54317	5.90243	5.77339	5.53211	5.82109	6.76503	5.84074	6.01682	6.06066	6.18364	6.25861	5.70309	6.38948	6.16387	5.6738	5.42496	5.78314	5.57049	5.59272	6.36438
LILRA6	5.43343	6.00612	5.31105	4.5966	5.1915	4.79136	5.21244	5.02149	5.96387	5.62131	4.29748	4.93673	4.80561	7.01286	6.21799	6.63995	5.15274	7.7108	5.7428	4.16575	6.29949	5.75667	5.64326	5.41331	4.90591	6.76272	8.25421	5.345	6.00856	5.87317	6.26983	6.4865	6.0012	5.10198	6.40666	5.39522	5.28912	5.73149	5.38974	5.64001	6.5275	4.99807	5.16556	5.6189	4.40296	5.37543	6.70745	5.62966	5.48422
LILRB3	3.95196	4.4615	4.93628	4.03744	4.10441	4.2589	4.64968	4.40392	4.98397	4.52275	4.39454	4.19176	5.07249	5.69185	5.21866	5.07058	4.06167	6.95592	4.62197	4.6065	5.35098	4.30169	4.53635	4.17486	5.23502	5.29136	6.90784	4.32303	4.75352	4.16981	4.11399	4.06199	4.79464	4.03729	5.21357	4.42648	5.05872	5.56174	4.94624	4.5958	4.92871	4.99807	5.06192	5.33924	4.30527	4.70224	5.50203	4.92155	4.84847
LILRB4	7.60137	8.28158	8.98067	7.12132	8.14713	9.37187	7.93757	7.03328	7.88834	8.60216	7.52563	7.70917	8.24751	8.63532	8.50984	8.83422	6.79763	9.18283	8.02267	7.16178	7.98057	7.97136	8.03664	7.96664	8.99202	9.14632	10.1981	8.84177	8.66555	8.46038	8.41194	8.49529	8.11489	8.00289	9.2596	8.71949	9.15424	9.63571	8.18376	7.904	8.9961	8.88745	8.11799	9.88106	8.13487	7.89967	9.04346	7.17687	6.97278
LIMD2	7.91452	8.5069	9.22122	6.48253	6.67624	10.1076	7.64184	7.78175	7.37684	7.38768	7.93514	7.81879	7.54107	9.41594	8.8759	7.73706	7.59308	9.41062	7.15303	8.25978	7.39392	8.41475	8.54709	7.38493	10.2811	8.8406	9.37111	8.6818	8.02069	8.47724	7.79802	8.16361	8.66248	8.76902	9.09741	10.0003	9.62466	9.44073	9.19819	8.59653	8.51571	8.58286	7.81192	8.30584	8.16272	7.7956	7.5325	6.82256	6.28458
LINC00839	4.24166	5.76337	4.82136	3.89172	4.10441	4.70419	3.88413	3.22793	4.76989	4.03708	4.39454	4.74084	4.4564	4.91117	4.32537	4.60463	3.71372	4.41737	4.71074	4.04357	5.84776	4.19258	4.07201	4.07783	3.85035	3.70415	5.99	5.71304	4.98331	4.30943	3.74481	4.48012	5.23742	4.15858	5.71733	4.70819	4.39382	4.95847	5.1628	4.21257	5.07258	4.51637	5.35038	3.86205	4.40296	4.5398	4.69559	4.55024	4.1953
LINC00861	5.98031	5.49484	7.0655	3.89172	5.03094	8.86978	5.65891	6.10836	4.93397	5.05489	6.04251	6.04466	4.97274	7.7346	6.45765	5.02699	5.65062	7.40065	5.13507	5.75535	5.72354	5.89852	6.20246	4.9525	8.00845	6.33074	7.11313	6.39629	6.58749	5.83788	5.90243	6.50385	6.90079	6.66703	6.37225	7.79947	6.87073	6.3436	6.70152	6.32223	7.21037	6.91466	5.21434	6.34193	6.43753	6.39335	6.06761	4.24186	4.57257
LINC00937	3.22793	4.06385	4.05441	3.89172	3.22793	4.32692	3.88413	3.91921	4.14561	3.22793	3.9135	3.84421	4.04567	4.44996	4.32537	4.00161	4.06167	4.8683	3.99339	3.22793	3.22793	3.91627	3.82898	3.65746	3.22793	4.74387	4.70721	3.78525	4.46425	4.30943	4.24597	3.22793	4.36161	3.8916	4.65055	3.88156	3.91307	4.40917	4.09015	4.08466	3.79382	4.74827	3.93648	4.46789	3.71863	4.23364	3.22793	3.22793	3.22793
LIPN	3.95196	4.32281	4.46911	3.22793	3.22793	3.62469	3.22793	3.22793	3.22793	3.69914	3.9135	3.22793	3.22793	5.24106	3.22793	4.00161	4.06167	4.48538	3.22793	3.22793	3.7316	3.91627	3.65446	3.65746	3.22793	3.22793	5.99	4.01134	3.70743	3.77809	3.74481	3.22793	3.22793	4.35846	4.43176	3.69207	3.91307	3.87176	4.33065	3.22793	4.1961	3.72874	4.09152	3.22793	4.30527	3.22793	3.71007	3.74266	3.667
LRRC55	4.45763	4.83833	5.04111	3.22793	3.7391	5.85471	4.43101	4.07066	4.64575	4.52275	4.39454	3.66535	4.04567	6.47725	5.05114	4.21915	4.63568	5.56065	4.79296	5.47382	4.52334	4.48756	4.16842	3.65746	4.44596	4.04554	5.65251	4.32303	4.28151	4.53823	4.46276	4.70645	4.36161	5.35058	4.34682	5.07655	4.48193	5.56174	4.94624	4.9937	5.96807	5.10584	4.43227	5.19267	5.46299	4.62407	4.17937	4.35606	4.36448
LRRK2	8.41525	8.77014	8.78778	6.23079	7.24108	9.8874	7.74511	8.07982	8.09406	7.46405	7.69316	7.35768	7.00364	9.40947	8.67631	7.95094	8.07909	9.63353	7.85588	7.96614	8.56829	8.56731	7.90361	6.88751	9.21914	7.30644	9.84733	8.39052	8.36525	8.08837	7.68303	7.42375	8.08281	8.22371	8.02942	8.03323	8.23122	7.89169	8.28299	8.7527	8.54422	9.35273	7.93955	8.70628	8.95021	8.44272	8.69925	6.43344	7.17055
LRRN2	5.86283	7.2127	7.19615	9.33407	9.19364	6.00992	10.4267	6.34418	10.6611	11.2675	5.91654	10.0358	7.78351	5.88354	10.352	10.3434	6.4322	7.44328	8.01515	6.362	9.22329	5.59825	8.76256	9.77655	6.58124	7.76264	5.65251	5.04754	8.68766	6.18378	9.33771	9.3171	9.03619	6.21053	6.33698	6.80551	5.68601	10.024	6.56685	6.12197	9.08802	6.19816	7.66365	8.01372	6.67453	8.93033	8.20019	8.50953	8.25408
LTA	5.59231	5.59881	6.19705	3.89172	4.23506	7.36726	4.88626	5.07349	4.70955	5.1465	4.77563	4.62859	4.36989	7.67817	5.29477	4.9818	4.39169	6.90584	4.79296	5.24614	4.68404	5.59825	6.1178	4.86343	7.58387	5.25046	6.57252	5.86508	5.59265	5.68683	5.30809	5.51725	6.19695	5.00682	6.08311	7.29533	5.86138	6.32641	5.61843	5.76962	6.03525	5.61099	5.21434	6.73071	5.12195	5.68366	4.88228	5.152	4.84847
LTB	7.6192	8.45462	9.40283	6.25035	6.60694	10.4549	7.18316	6.97127	6.89424	7.12017	7.10593	7.40291	6.45641	10.4675	8.98252	7.02562	7.04161	9.71531	7.41597	8.68709	6.94256	8.52108	9.23517	6.98658	10.5501	7.3799	9.84396	8.54625	8.06079	8.8877	7.79802	8.17974	8.95588	8.19913	8.70867	9.9498	9.50363	9.88331	8.87344	8.6341	8.18723	9.05772	8.00584	8.69351	7.87014	7.27107	7.26077	7.15253	6.49751
LTF	6.58708	6.76147	9.06822	6.30743	5.90849	11.5618	6.50357	6.66092	5.84282	6.92939	6.28498	6.19149	4.6099	7.7346	7.93635	5.91943	6.58661	9.1974	5.19336	6.56521	6.40277	5.45647	9.43928	5.8422	10.7036	5.51291	12.4449	7.31971	8.02648	6.31644	5.84097	5.88532	7.74284	6.8306	7.65777	8.67873	5.77652	8.02393	7.60065	8.17167	7.58521	7.68986	6.70545	9.04717	8.17917	6.35155	6.4851	7.06391	6.78981
MAK	4.24166	4.15938	3.90576	3.69935	3.22793	4.10438	3.22793	3.91921	4.02592	3.89142	3.22793	4.19176	3.70423	4.44996	3.22793	3.86212	4.18638	4.95759	3.77233	3.70299	3.9367	3.91627	3.96147	3.65746	4.1016	3.70415	5.15435	4.01134	3.903	3.22793	3.22793	3.22793	4.0396	3.8916	4.14885	3.22793	3.22793	3.68506	3.73063	3.72736	3.22793	4.08697	4.52295	4.30961	3.91863	3.22793	3.71007	3.22793	4.50785
MASP1	6.08858	8.28158	6.68936	6.01845	5.03094	8.65423	6.59559	6.42097	7.87633	8.00216	5.24741	7.46109	5.11949	6.80367	9.05376	7.1245	6.96897	9.05842	7.19368	4.96862	9.21211	5.84353	9.20119	6.84587	7.0575	7.18866	7.07898	6.98928	9.33859	7.51072	9.71692	9.15268	8.51008	6.98887	7.42832	6.55615	6.87073	7.61227	6.29504	6.53358	7.5061	7.49337	7.14439	7.4705	6.96914	9.14493	9.70758	5.20349	6.56638
MCHR1	4.35583	4.15938	4.05441	3.22793	3.94715	4.44973	3.22793	4.40392	3.69253	3.22793	4.18877	3.84421	3.89854	3.89488	3.22793	3.86212	4.29485	4.17787	3.99339	3.70299	4.2207	3.91627	3.96147	3.83318	3.85035	4.04554	5.44577	4.82715	4.1743	4.63583	4.71954	4.39212	4.0396	4.52308	4.14885	4.02514	4.70854	4.62439	4.09015	3.9308	4.33929	4.8159	4.09152	5.15323	4.71981	4.10316	3.71007	3.22793	3.22793
MEDAG	6.34907	5.46752	5.42729	4.52331	4.5416	5.67962	4.71363	6.13152	5.16572	4.52275	5.59026	4.19176	4.27471	5.83146	5.46749	4.00161	6.19584	6.12299	4.94168	5.83751	6.21102	6.27387	5.4296	4.9088	5.60944	4.67882	7.2318	6.06556	6.36522	6.57053	5.7766	4.89427	6.88841	5.84731	4.65055	5.24582	5.52017	5.09566	5.9845	5.88795	4.76505	5.94939	6.01453	4.39201	6.12963	5.75078	6.22103	3.95211	4.69126
MEFV	5.66518	6.3053	6.27883	4.5966	5.28818	5.72053	6.08167	6.01165	6.13787	5.7103	5.65573	5.32108	5.40713	7.55819	5.591	6.51365	5.65062	8.14404	6.36588	5.47382	5.47412	6.65052	5.91112	5.82041	5.55396	5.92023	9.10158	6.72353	5.77451	5.76445	5.39862	5.58601	5.56471	5.10198	6.20603	5.16403	6.81628	6.37734	6.18364	5.49654	6.61691	6.44787	6.44128	6.43805	6.1524	5.93433	5.99629	5.6656	6.01357
MEGF11	3.95196	3.82309	3.90576	3.22793	3.7391	5.15061	3.88413	3.22793	4.14561	3.22793	3.22793	4.0931	3.89854	4.26915	4.32537	3.86212	3.91177	5.11852	3.77233	4.27206	4.33271	3.71694	4.16842	3.83318	4.99682	3.22793	3.91241	4.18178	3.22793	3.22793	4.24597	3.91204	4.26706	3.22793	3.88455	4.14473	3.22793	4.13119	4.21883	4.08466	3.22793	3.72874	4.22038	3.67811	3.71863	4.10316	3.90668	3.95211	3.22793
MIR155HG	5.15164	5.25843	6.67443	4.79073	4.91091	7.92909	5.56846	4.96718	4.88179	4.44387	5.15709	5.3538	5.25075	7.69249	6.03895	4.9818	5.65062	7.31902	6.10355	5.915	5.55026	6.16707	6.51088	4.86343	7.36818	6.34934	7.07898	6.44456	6.38362	6.18378	6.38067	6.13082	6.81176	6.17	6.66953	7.26803	6.57483	6.79318	6.27346	6.51562	6.57291	6.60982	5.30661	5.87353	5.38579	6.04435	6.35926	5.04218	5.29423
MIR378I	4.24166	4.24491	5.75428	3.89172	4.10441	7.03843	4.25275	4.30616	4.02592	4.35817	4.06377	4.19176	4.16814	4.73638	5.21866	3.22793	4.18638	5.32671	3.22793	4.45333	3.7316	3.91627	4.89813	3.96656	5.90154	4.04554	4.70721	4.32303	4.92992	4.30943	4.64059	4.63619	5.46442	4.52308	4.71453	5.91461	4.06324	5.05162	5.00407	4.08466	5.31831	4.99807	3.22793	5.26805	5.02012	4.10316	4.47072	3.95211	3.84652
MMP1	7.9431	11.438	9.51925	8.80579	9.74047	8.25997	7.6057	9.21468	7.48371	6.8929	9.12296	7.33451	6.50688	11.3824	6.34292	9.20646	8.32105	12.5804	8.60146	8.40222	9.2093	10.4954	8.45846	6.57942	6.60793	7.69956	15.3	11.7454	9.41345	9.14839	9.18033	10.2214	9.25093	9.53145	12.7466	11.5456	9.19457	10.3798	8.94585	9.38955	8.72444	7.45627	11.901	9.88247	6.90432	10.5656	7.67383	8.81399	9.26452
MMP13	4.54998	4.52416	3.70941	3.22793	3.7391	4.10438	4.02825	4.19663	3.69253	3.89142	4.06377	3.22793	3.22793	6.81686	3.68492	3.22793	3.91177	5.47771	4.16016	5.1151	4.09179	6.12195	4.65231	3.22793	3.85035	3.22793	6.85492	7.7489	4.28151	6.46067	3.22793	3.22793	3.70064	3.8916	4.2534	4.14473	4.83724	4.13119	3.93534	4.87565	4.02325	4.51637	3.73144	4.00154	3.91863	3.73836	3.90668	3.74266	4.28386
MMP3	6.1397	8.3404	6.90902	7.28963	7.94598	5.89075	5.77078	6.9964	5.84282	6.32491	5.52141	6.46014	5.36977	10.3962	6.25483	7.54389	5.85736	12.0438	5.62528	6.28718	7.68086	8.58784	8.92814	5.58079	5.16055	5.16449	14.6781	7.22697	7.3242	6.83932	7.84462	7.14507	8.61096	7.80198	10.6557	8.99599	6.83009	8.71671	8.22316	7.55755	7.0913	6.9685	11.8006	10.1857	6.1524	9.55952	6.63198	7.29274	7.639
MMP8	3.22793	3.65025	3.70941	3.22793	3.22793	3.62469	3.69391	3.22793	3.22793	3.22793	3.22793	3.22793	3.22793	4.04126	3.22793	3.22793	3.22793	4.17787	3.77233	3.8968	3.22793	3.91627	3.82898	3.22793	3.85035	3.89843	4.77333	3.22793	3.22793	3.22793	3.74481	3.22793	3.22793	3.22793	4.02876	3.22793	3.22793	3.22793	3.22793	3.22793	3.22793	3.22793	3.73144	3.22793	3.91863	3.22793	3.22793	3.22793	3.22793
MMP9	8.24793	10.6651	10.5351	6.65295	8.707	11.0798	8.57871	10.1453	9.31305	9.05217	10.1653	8.14982	9.474	10.353	9.11919	8.54174	10.7187	11.708	7.63808	9.05292	7.15698	10.1147	9.48816	8.33921	10.3415	7.24876	9.74445	10.1777	7.63669	9.43956	7.31461	6.71195	8.15658	10.6021	9.03631	9.80585	10.6964	11.1233	10.0743	11.1549	9.72289	8.53039	10.1956	11.0507	9.50087	8.10638	8.8588	9.04889	8.92091
MNDA	8.05859	9.46834	8.16501	5.99531	7.60139	9.08594	7.82269	7.89922	8.14995	8.03586	8.05124	7.72704	8.17727	9.51574	7.77685	8.65479	7.92188	10.221	8.15169	7.46871	8.18906	8.89513	8.14163	7.68459	8.23761	8.3418	11.3753	9.20582	8.22106	8.08103	8.08347	7.89062	8.15658	8.24787	8.84816	8.0705	9.02003	8.802	8.34554	8.91748	9.30008	8.86997	8.42454	8.67414	8.27412	8.40284	8.10368	7.16475	8.30688
MS4A1	5.04184	6.92503	11.0477	6.36229	7.43252	12.8492	7.8963	5.90766	5.12272	7.63521	5.94267	8.45493	5.92058	10.8502	9.94209	5.19284	4.77198	10.6057	4.94168	6.39797	7.40381	6.84172	10.3117	6.74747	12.1139	5.57919	8.78044	6.34632	9.4846	5.80166	8.28826	8.70658	10.7915	7.59123	8.51968	11.5175	6.17851	9.60967	9.41044	9.90681	9.8987	9.017	5.68997	9.78806	9.84447	9.18367	7.97011	6.80701	6.28458
MYBPH	3.22793	3.82309	3.90576	3.22793	3.22793	3.62469	3.22793	3.22793	3.69253	3.69914	3.22793	3.22793	3.22793	3.70161	4.01306	3.22793	3.22793	4.08055	3.77233	3.70299	3.7316	4.06711	3.22793	3.22793	3.22793	3.89843	5.24457	4.32303	3.22793	3.22793	3.22793	3.22793	3.22793	3.69926	3.88455	4.02514	3.71465	3.68506	3.73063	3.9308	3.22793	3.72874	3.93648	3.86205	3.22793	3.22793	3.71007	3.22793	3.22793
NFE2	4.1102	5.25843	5.04111	4.15875	3.94715	4.32692	4.58175	3.22793	4.42762	4.44387	4.70943	4.28003	4.27471	5.50266	3.68492	4.78166	4.83442	6.80006	4.52521	4.45333	4.60671	5.01458	4.07201	3.22793	4.29022	4.74387	7.94976	4.01134	4.46425	4.0014	4.79327	4.48012	4.73349	4.95631	5.56974	5.03038	5.00704	4.90906	5.30371	4.81189	3.22793	4.51637	5.11482	4.6045	4.90901	4.34699	3.22793	4.85634	5.1112
NLRP12	3.95196	5.54784	5.31105	4.03744	4.34855	4.44973	4.77411	4.40392	4.02592	3.69914	5.05977	4.43442	4.864	5.56874	4.01306	4.88598	4.89368	5.11852	5.0096	4.6065	4.52334	5.33913	3.65446	4.17486	3.85035	4.80537	6.34069	5.345	4.05108	4.63583	3.74481	4.56106	4.16122	5.38771	5.92442	4.70819	4.95308	5.17933	4.88547	5.33559	4.92871	4.8159	4.88791	4.30961	5.02012	4.10316	3.90668	3.95211	4.74612
NNMT	7.66284	9.50252	8.79464	7.32652	7.97357	9.65701	8.27756	6.97127	8.31459	7.3613	7.84318	7.87864	7.42441	12.0702	8.73208	9.10885	7.53573	11.4841	8.48118	7.99546	9.03302	9.99688	9.05442	7.98106	8.6793	8.60123	10.7834	8.25658	8.51705	9.13075	8.70469	8.32213	9.09629	8.48995	10.4873	9.82776	8.21561	9.44269	8.3658	8.18298	8.29185	8.90473	8.88503	7.73679	7.61165	8.04288	8.93241	7.45067	8.41071
NOTUM	4.54998	5.41112	4.3818	3.89172	3.22793	4.01419	3.69391	4.49271	3.69253	3.89142	4.39454	4.19176	4.4564	4.36387	3.68492	4.11787	4.39169	4.17787	3.77233	4.86008	4.43264	3.91627	3.96147	4.07783	5.08139	3.22793	5.20026	4.32303	3.70743	3.77809	4.11399	3.71391	3.70064	4.79046	5.12878	4.76848	4.77471	4.13119	4.68141	4.42295	3.22793	4.59934	4.52295	3.86205	4.57328	3.94612	4.05552	4.11038	3.22793
NOX4	4.54998	4.83833	4.62399	3.69935	3.22793	4.44973	4.02825	4.40392	4.14561	3.69914	4.18877	4.62859	3.22793	3.89488	4.62401	3.22793	4.39169	4.48538	3.22793	4.27206	4.82424	4.19258	4.40576	4.34078	3.85035	3.70415	5.24457	6.09632	4.81535	5.94113	4.24597	3.91204	4.26706	4.44419	4.71453	4.02514	5.20194	4.5575	4.52097	4.51301	4.1961	4.59934	4.94875	4.11778	5.02012	4.84388	4.62577	4.45787	4.28386
NPFFR1	3.74255	5.41112	6.06461	5.8477	5.3781	7.39818	4.93855	3.22793	4.50556	4.44387	4.18877	6.04466	4.864	5.80466	5.8577	4.46801	4.18638	6.25825	4.41842	3.8968	5.43435	3.91627	5.33963	4.07783	6.55404	4.04554	5.80339	5.17504	5.03444	4.30943	4.64059	3.91204	4.96085	4.15858	5.08414	5.43003	5.77652	5.75782	4.21883	5.60556	5.61682	5.25181	5.00665	6.43805	4.30527	5.93433	5.31351	4.92155	4.94256
NPHS1	4.1102	4.06385	5.42729	4.03744	4.23506	5.97691	4.02825	4.30616	4.14561	3.89142	3.9135	4.28003	3.70423	4.73638	4.32537	4.39212	4.06167	5.35834	4.29847	4.27206	4.2207	3.71694	4.47317	3.65746	5.30537	3.89843	4.29582	4.01134	4.46425	4.0014	4.24597	3.71391	4.36161	3.8916	4.34682	4.57672	4.18817	4.85749	5.00407	4.5958	4.46333	4.51637	3.93648	4.21905	4.57328	4.10316	3.90668	3.22793	3.22793
NR4A3	5.95187	6.77226	6.08758	5.65254	9.3673	6.589	5.12769	6.10836	5.56269	5.45843	5.15709	5.3538	4.7441	7.28318	5.9513	5.33942	6.01266	7.44328	4.94168	6.12434	5.58675	7.51929	6.23493	5.15015	6.7819	5.25046	7.99305	6.12641	6.77955	6.90762	5.35414	5.19931	6.27584	6.56211	6.58222	5.70799	6.1115	7.36836	6.13647	6.96161	5.74425	5.83582	5.96095	6.0272	5.70249	5.45946	7.29038	6.14016	6.25134
NRCAM	5.59231	5.00823	6.71875	4.79073	5.42083	8.94271	6.47152	5.98638	6.15816	5.84675	6.06638	5.10492	5.16478	6.9781	7.62546	6.66656	6.52006	7.02321	7.83894	6.68608	6.27789	6.18909	5.4296	5.65725	7.54325	6.40369	7.18978	5.39701	5.22013	6.15567	6.33738	6.37765	5.6276	6.95387	5.77212	5.76265	6.47251	5.56174	5.84369	6.02282	6.09933	6.91466	6.51669	6.2208	6.86397	5.49955	7.13579	3.95211	4.89645
NT5DC4	3.74255	4.24491	5.26987	3.69935	3.7391	6.10447	3.88413	4.19663	4.02592	3.89142	4.29748	3.84421	5.25075	4.91117	4.32537	3.67816	3.22793	4.66602	4.71074	4.27206	3.9367	3.91627	4.16842	3.96656	5.30537	5.25046	4.56175	5.04754	4.05108	4.30943	3.22793	4.06199	3.70064	4.15858	4.14885	4.42648	5.1083	5.70464	5.1628	4.7444	4.92871	4.87979	4.82376	5.33924	4.06996	3.73836	3.71007	4.11038	4.0963
OIT3	4.1102	4.06385	4.17811	4.15875	3.22793	3.22793	3.88413	3.91921	4.42762	3.69914	3.71496	3.84421	4.16814	4.26915	3.68492	4.21915	4.47966	4.26497	4.94168	4.04357	3.7316	3.91627	3.82898	4.41367	3.85035	4.36971	4.29582	4.55436	4.37725	4.30943	3.74481	3.91204	4.0396	4.35846	4.93956	4.34188	4.56297	4.13119	4.21883	3.72736	4.02325	3.93271	4.43227	3.86205	4.06996	3.94612	4.38331	4.45787	4.0963
OLFML2B	7.21209	8.59104	7.3995	5.71122	6.47684	8.00324	7.13315	6.81042	6.92968	5.99433	6.74671	6.44568	5.8952	7.00137	7.40855	7.07592	7.18736	8.53349	6.54534	7.21272	8.15439	6.77119	7.16508	6.6295	7.36818	6.72074	8.91502	8.48482	7.67414	7.58532	7.46157	7.30106	7.45572	7.53726	8.49224	7.6666	7.69145	7.91459	7.58342	7.49527	6.89173	7.52953	6.92808	6.85136	7.61972	7.29312	8.82894	5.39091	5.59719
OLR1	5.15164	5.29045	5.99334	4.03744	4.91091	4.91086	4.43101	5.60673	5.24756	6.20993	5.10938	5.6685	5.36977	7.07993	5.25728	5.1534	5.19863	5.56065	4.71074	5.57439	5.72354	5.84353	4.85299	4.9088	4.80744	5.11921	7.12434	6.18472	5.74585	6.15567	5.15908	4.70645	4.73349	5.4238	5.66022	4.9824	5.58899	5.29529	5.9845	6.25861	5.70309	4.99807	5.47351	5.30413	5.93258	5.33129	5.6356	5.83225	6.30091
ORM1	3.22793	4.15938	3.22793	3.22793	4.10441	3.22793	3.22793	3.22793	3.22793	3.22793	3.22793	3.22793	3.22793	3.22793	3.22793	3.86212	3.22793	3.83514	3.22793	3.22793	3.22793	3.22793	3.22793	3.22793	3.22793	3.22793	4.63692	3.22793	3.22793	3.22793	3.22793	3.22793	3.22793	3.22793	3.22793	3.22793	3.22793	3.68506	3.22793	3.22793	3.22793	3.72874	3.22793	4.21905	3.22793	3.73836	3.22793	3.74266	3.22793
OSM	3.95196	7.25164	4.3818	3.89172	4.91091	4.32692	4.43101	3.22793	5.28659	4.44387	3.9135	4.43442	4.36989	6.7358	5.8817	4.30972	4.06167	7.2486	4.94168	5.06819	4.43264	5.66387	4.94161	3.65746	4.44596	4.53578	9.67408	4.18178	4.75352	5.09135	4.71954	4.48012	4.44755	4.26415	5.66022	5.24582	4.29682	5.00593	4.43041	3.9308	4.1961	4.4261	5.58611	5.70043	3.91863	3.94612	5.75708	5.59272	6.71917
OTOP2	7.82522	7.68018	8.80147	11.5363	10.0974	7.91635	12.3103	8.61601	10.9369	10.0282	8.24842	10.1788	10.9131	6.76334	9.2664	12.2209	8.98748	7.69913	10.8716	8.63221	12.4589	9.32252	10.734	12.5506	6.85039	9.68152	5.96485	7.57734	8.27074	7.74255	9.64864	10.5505	7.46406	7.62857	8.51968	10.5286	8.14597	11.3213	7.52146	8.65456	10.3928	7.94523	9.72124	8.67414	7.54542	9.79332	8.14198	10.0417	8.99452
P2RX5	4.92123	5.12164	7.59343	4.26433	4.70423	9.20057	5.77078	4.72099	4.50556	4.66456	5.29027	5.02372	4.4564	7.47778	6.84133	5.50203	4.39169	7.29593	5.4506	5.28697	5.47412	5.92521	6.4154	4.9525	7.87311	6.15125	7.33176	6.26785	6.30853	5.64628	6.04507	6.15313	6.86331	5.62184	6.319	8.33393	6.68555	6.63563	6.51286	6.25861	6.68044	6.65993	5.00665	6.35842	6.19686	5.99043	6.02048	4.78728	4.50785
P4HA3	5.30023	5.12164	5.53406	3.69935	3.94715	4.91086	4.50915	4.96718	4.24982	4.79008	4.70943	4.56781	4.6099	4.52919	4.80313	4.53857	4.06167	4.48538	4.52521	4.74043	5.06245	4.64443	4.59591	4.41367	5.37208	4.4562	6.45244	5.04754	5.17622	5.32149	4.86255	4.70645	4.66882	5.10198	4.77504	4.50436	4.6382	4.68737	4.8214	4.87565	4.33929	4.32666	6.78359	4.11778	5.07209	4.34699	4.93839	4.11038	3.98273
PACSIN1	4.98304	4.74315	5.63289	4.15875	4.5416	6.13461	3.69391	4.57436	4.82719	4.44387	4.56378	4.62859	4.53599	4.73638	5.25728	4.72573	4.77198	4.26497	4.29847	4.36703	4.8884	4.06711	4.80604	4.34078	5.60944	5.02337	5.05714	4.01134	4.75352	4.30943	4.98996	4.18675	4.96085	5.00682	4.88724	5.56076	4.83724	4.90906	5.50901	4.81189	4.67351	5.5018	4.22038	4.00154	4.78639	4.23364	5.13997	3.74266	4.28386
PADI2	12.3052	13.7953	11.8652	14.276	14.2027	11.8237	14.9119	11.6997	14.8284	15.0971	12.4758	14.6493	14.7969	10.3731	14.2518	14.7424	12.2274	11.6641	14.3518	11.4897	14.1316	11.9971	14.0295	14.8681	11.0373	14.1982	9.31136	9.15656	14.1907	10.6393	13.9758	14.2477	14.0214	12.1698	12.4099	13.5062	8.77251	13.8616	12.313	11.3511	13.8899	10.822	14.2495	13.0297	12.0002	14.2869	14.0771	15.2267	14.5357
PADI4	4.71349	5.67181	5.09033	4.26433	4.23506	4.83257	4.34612	4.65014	3.8822	3.69914	4.18877	4.62859	4.6099	6.00569	4.32537	4.53857	4.47966	4.95759	5.40307	4.16575	4.82424	5.2101	4.16842	3.83318	4.29022	4.4562	6.89479	4.97848	4.05108	4.0014	4.36058	3.71391	4.16122	4.52308	5.79871	5.07655	4.89658	5.33173	5.38974	4.32375	4.57365	4.51637	4.43227	3.86205	4.40296	4.23364	3.71007	4.45787	4.57257
PANX2	3.22793	4.15938	4.05441	3.69935	3.7391	4.01419	3.69391	3.22793	3.8822	4.03708	3.71496	3.66535	4.27471	3.70161	3.87157	3.22793	3.71372	4.60915	3.99339	3.70299	3.9367	3.91627	3.82898	3.22793	4.1016	4.4562	4.70721	4.32303	4.1743	3.22793	3.74481	3.91204	3.70064	4.44419	4.50994	4.02514	3.22793	4.32568	3.93534	3.9308	4.02325	4.87979	4.22038	4.11778	3.91863	3.22793	3.22793	3.74266	3.667
PARP15	6.85265	6.42016	8.19647	5.10229	5.42083	10.6841	7.19295	7.61391	6.13787	5.94687	7.29677	7.12535	6.04091	9.53767	8.06466	6.22102	7.31962	8.34068	6.36588	7.33728	7.28034	7.6186	7.66599	6.07984	9.33448	7.73495	8.09874	7.97712	7.79464	7.10941	7.35816	7.50293	8.59589	8.32259	8.03487	9.16289	8.10702	7.8801	8.13736	7.94448	8.19445	8.60839	6.18728	7.23454	8.52636	7.54345	7.06895	5.6656	4.94256
PAX5	4.35583	6.46093	9.47508	5.10229	5.81777	11.0141	6.53491	4.30616	4.82719	6.34319	5.24741	6.83681	5.40713	8.80608	7.88513	5.1534	4.89368	9.19325	5.49647	5.69769	6.46128	5.52925	8.60022	5.4997	10.7826	5.61114	7.07898	4.74343	7.40671	4.88556	6.22292	6.4865	8.25102	5.14695	6.76503	9.18731	5.33059	7.61227	7.85139	7.97736	7.93484	7.52058	5.11482	7.98254	8.19543	7.3468	6.32113	6.06275	5.36068
PCDH17	7.20027	8.65903	6.83057	5.71122	6.69305	7.48713	6.55033	7.43304	7.92376	6.04021	6.22292	6.82574	5.64267	7.84121	7.56158	7.30386	6.63454	8.55628	6.86464	7.70728	8.81006	6.74197	6.88032	6.51422	6.99846	5.99367	8.32365	6.49122	7.45057	6.94058	7.23506	7.01879	7.46406	6.4821	7.8432	6.72716	6.45471	7.37664	6.7489	6.97475	6.83715	7.48419	8.14176	6.76799	6.69004	7.64968	7.394	6.18948	6.78981
PCDHAC2	4.1102	4.32281	4.75934	4.79073	4.77733	6.34204	4.14827	3.71905	4.14561	4.66456	4.18877	4.0931	3.70423	4.36387	4.32537	4.30972	4.06167	4.91378	3.99339	4.36703	4.2207	3.71694	4.80604	3.83318	4.58046	4.16799	4.39274	4.01134	4.1743	4.0014	3.9551	4.06199	4.16122	4.26415	3.88455	4.14473	4.06324	3.22793	4.75357	4.32375	5.00277	4.51637	4.09152	4.46789	4.49169	4.62407	4.05552	4.11038	3.84652
PDCD1	5.43343	6.07838	6.71875	4.26433	4.5416	7.21575	4.25275	4.96718	4.64575	4.59601	6.24391	5.2176	5.61146	6.76334	5.67667	4.78166	5.48074	6.30578	4.29847	6.48407	5.58675	6.02707	6.15228	4.54504	7.68689	5.36946	6.34069	5.86508	5.22013	6.00589	5.21071	5.10577	5.59652	6.49847	6.71124	7.43278	5.8054	6.19985	6.33724	6.07328	5.31831	5.8651	5.35038	5.40672	5.53592	4.97013	5.2297	5.0983	5.07116
PDE4B	8.75019	9.33919	9.24646	8.50257	9.32781	10.1048	8.42153	8.79411	8.20375	8.20334	7.96661	8.59436	7.8431	10.5215	9.01462	8.00367	8.1242	10.4301	8.45365	8.44955	8.36104	9.38249	8.63957	7.46933	9.59788	8.80115	10.8216	9.55173	9.31038	8.78314	8.28264	8.1473	9.52386	8.38493	9.48905	8.79454	9.14054	10.1145	9.02439	9.00927	8.96271	9.57397	9.34256	9.41111	8.87819	8.80973	10.0002	8.19605	8.79585
PDPN	7.26977	9.62874	7.96643	5.89868	7.32934	8.22942	7.10228	7.38639	7.59787	6.34319	6.91185	6.53029	7.26867	9.84001	7.56882	8.1605	7.12193	10.6002	7.99999	7.5891	9.2833	8.43756	7.6835	6.28266	7.64911	7.9307	10.5716	8.07137	7.25658	7.95824	7.19956	7.82374	7.39594	8.27635	10.3135	9.00701	7.85495	8.82029	7.77004	7.81947	8.33166	8.24036	8.77917	7.89593	7.47598	7.27107	7.71801	7.02418	7.74887
PHOSPHO1	4.1102	4.58323	4.28571	3.89172	3.22793	3.7873	3.69391	4.40392	4.14561	3.69914	4.56378	4.0931	4.36989	4.73638	3.22793	4.11787	4.18638	5.58718	4.71074	3.70299	4.09179	4.19258	3.22793	3.65746	3.85035	4.74387	6.6832	4.55436	3.22793	3.77809	4.11399	3.71391	3.22793	4.03729	5.21357	4.34188	4.06324	4.68737	4.43041	4.21257	4.33929	3.72874	4.52295	4.00154	4.06996	4.44807	4.05552	3.74266	4.98696
PI15	5.76759	7.87697	5.83869	4.5966	5.50233	5.94309	4.50915	5.07349	8.79412	7.18185	5.4488	6.40139	5.40713	7.17498	7.77059	4.11787	6.63454	6.12299	6.13212	6.50067	5.93405	4.96044	7.20612	5.07486	5.66271	7.86836	7.51291	3.78525	7.76719	8.6207	7.758	8.6652	8.1921	8.34964	5.53816	6.23426	5.91517	5.00593	5.6867	6.44142	8.66337	7.47494	6.72143	5.70043	6.50939	8.06862	5.60344	4.92155	6.42511
PLA2G2D	5.62924	6.68354	9.53777	5.35092	6.60694	10.8901	6.10292	4.72099	5.84282	6.9532	4.63905	6.19149	5.64267	7.87924	7.62546	4.9818	4.77198	7.82793	4.94168	5.63745	5.55026	4.96044	7.6835	5.52728	10.9966	7.13657	7.63519	5.29081	7.62143	4.80824	5.7766	4.89427	7.76324	5.19037	6.61193	8.12718	6.70068	8.66029	7.78518	7.6665	7.92619	9.37521	8.23313	10.3724	8.02991	7.30402	7.95174	6.41293	5.5419
PLAU	9.53437	10.663	9.82762	7.45695	8.51868	9.38116	9.2414	8.97479	9.65051	8.97329	9.02781	8.97651	8.4944	10.1596	9.74259	9.6113	9.70885	11.8644	9.77684	9.82072	10.6083	9.89186	9.26256	8.70317	9.58463	9.91191	11.9559	10.8449	10.2339	10.6702	9.82722	9.89537	9.78681	9.82261	11.0293	10.0517	10.132	10.7651	9.8751	9.78226	9.86747	9.9764	9.77729	10.0633	9.60391	9.32902	10.0514	8.4659	8.93387
PLEK	9.4172	10.4848	10.5625	7.81548	9.01619	11.2643	9.30352	9.0151	9.374	9.44769	9.03969	8.90254	8.96231	11.737	10.0007	9.7778	9.00264	12.1712	10.0837	9.53794	9.36636	10.3151	9.77301	8.64402	10.8127	9.99582	12.2945	10.631	9.6588	10.201	9.44226	9.37422	9.84529	9.6118	10.2691	9.92097	10.5341	10.8514	10.0163	10.1976	10.4676	10.386	9.83306	10.6609	9.72827	9.85924	10.0282	9.24797	10.3938
PMCH	3.22793	3.65025	3.22793	3.22793	3.22793	4.2589	3.22793	3.22793	3.22793	3.22793	3.22793	3.66535	3.22793	4.16311	3.87157	3.22793	3.22793	3.22793	3.22793	3.22793	3.22793	3.22793	3.65446	3.22793	3.85035	3.22793	3.71418	3.22793	3.22793	3.77809	3.22793	3.22793	3.22793	3.22793	3.22793	4.02514	3.22793	3.22793	3.22793	4.51301	3.22793	3.22793	3.22793	3.22793	3.22793	3.22793	3.22793	3.22793	3.22793
PNOC	5.55434	6.58889	6.98338	4.9566	5.65171	7.55453	6.24323	4.40392	5.24756	4.79008	4.83819	5.94432	5.57952	5.85775	6.3599	6.02742	4.56057	6.86446	6.3172	5.75535	5.93405	5.59825	6.20246	5.18617	7.38362	6.93156	7.54655	6.18472	7.06642	5.09135	6.59757	6.46893	6.63	6.19041	7.78617	7.74119	6.06497	7.56959	6.08764	5.80018	6.55039	7.27632	5.68997	6.37471	6.17481	6.28641	6.91242	4.35606	3.84652
POU2F2	7.62803	8.28158	9.16407	6.53109	7.03325	10.4614	7.2965	7.21537	6.89424	7.03356	7.17241	7.36532	7.17881	9.52974	8.47565	7.52956	7.33893	9.20153	7.82179	7.89326	8.11286	7.77742	8.47194	6.81382	10.2688	8.07013	9.63951	8.30908	8.67664	8.39682	8.0441	8.03358	8.93209	8.35854	9.07381	9.7463	8.14597	8.99948	8.58468	8.43562	8.51571	8.9218	7.57026	8.21936	8.19003	8.04288	8.02971	6.79128	6.69482
POU3F1	3.74255	3.82309	3.90576	3.89172	3.22793	4.18521	3.69391	3.71905	3.69253	3.22793	3.71496	3.84421	3.22793	3.89488	4.13093	3.67816	3.91177	4.08055	3.22793	3.8968	3.7316	3.71694	3.65446	3.65746	3.85035	3.22793	3.71418	4.18178	3.903	3.77809	3.22793	3.91204	3.70064	3.8916	4.02876	4.64444	3.71465	4.01328	4.09015	3.22793	3.22793	3.72874	3.22793	3.86205	3.91863	3.73836	3.71007	3.74266	3.667
PRG4	3.22793	3.22793	4.05441	3.69935	3.22793	4.18521	3.22793	3.91921	3.22793	3.69914	3.71496	3.84421	3.22793	5.06345	4.13093	3.22793	4.06167	4.08055	3.22793	3.22793	3.7316	3.91627	3.65446	3.22793	4.80744	4.16799	3.91241	3.78525	3.903	4.16981	3.22793	3.91204	4.44755	3.69926	4.2534	4.8803	3.71465	3.87176	3.93534	4.08466	4.46333	4.21521	3.93648	3.86205	4.06996	3.22793	4.17937	3.22793	3.667
PROK2	4.24166	4.15938	4.46911	3.22793	3.94715	4.18521	3.69391	3.22793	4.14561	4.03708	3.71496	3.22793	3.22793	5.77732	3.87157	4.46801	4.18638	8.58505	3.99339	3.70299	4.2207	5.11617	3.82898	3.83318	4.29022	4.04554	8.39451	4.32303	4.05108	4.30943	3.9551	3.71391	3.70064	4.79046	5.33101	4.02514	5.00704	4.13119	4.8214	3.72736	3.79382	4.32666	4.94875	4.72559	4.30527	3.94612	3.22793	4.6351	6.14662
PRRX1	4.63482	8.23583	7.24725	5.8477	6.75837	9.30999	6.03817	5.07349	6.7823	7.24098	4.06377	7.30303	4.91961	7.82831	8.96072	5.61909	5.15274	10.22	5.66561	5.47382	7.91302	5.06642	8.3274	4.9525	7.97833	5.02337	8.05856	5.54172	8.52526	5.83788	8.18951	6.46893	9.12543	5.99491	7.67883	7.79311	5.24627	7.61227	6.06256	6.04828	6.995	6.81523	7.87715	8.11782	6.59437	8.73542	8.35727	6.03596	6.0529
PSMA8	3.74255	3.95433	4.54942	3.22793	3.22793	4.50581	3.88413	3.91921	3.69253	4.26388	3.71496	3.97993	4.6099	4.04126	4.13093	4.11787	3.71372	4.17787	3.99339	4.04357	3.22793	4.19258	3.96147	3.65746	4.80744	4.27454	4.06245	4.18178	4.46425	3.22793	4.46276	4.06199	3.89351	4.03729	4.34682	4.02514	3.91307	4.01328	3.93534	3.72736	3.22793	4.59934	3.22793	4.11778	3.22793	4.10316	4.05552	3.22793	3.22793
PTGDS	7.20027	9.95216	9.68166	5.6822	6.88063	11.4143	6.47152	7.58942	8.3012	7.95597	8.48399	7.7964	9.21594	10.2077	10.0634	6.23898	8.28675	9.77617	8.77163	8.58675	8.18334	7.51929	9.52417	6.76993	10.7985	9.10372	10.2295	8.00923	8.25107	8.99691	7.65715	8.76827	8.24136	9.41897	10.9595	10.4641	8.92414	10.5197	8.10155	9.58758	9.47606	10.5198	10.0494	10.005	9.55646	8.49583	8.86535	6.9554	6.73119
PTGS2	7.17634	11.5074	7.38133	5.19069	8.91321	7.30335	8.09171	6.89312	8.94812	7.44743	6.43819	8.4151	5.86935	8.56326	9.82934	6.40696	6.37674	9.01679	8.33794	7.32807	8.06389	7.87431	6.92042	5.3832	7.42894	6.42135	11.2788	7.65048	7.7741	7.72381	7.07446	6.52099	8.16682	6.60803	8.0403	6.64423	6.59119	8.48029	7.00415	7.46773	6.83715	7.68986	9.82392	7.43249	6.64301	8.0034	9.45092	6.82256	8.17763
PTHLH	3.95196	5.76337	4.62399	3.69935	4.5416	5.61584	4.14827	4.30616	4.88179	4.26388	4.4827	4.56781	4.16814	4.96409	5.09518	4.53857	4.29485	4.99985	4.41842	4.6065	5.87713	4.64443	5.06336	3.96656	4.44596	4.16799	5.68406	4.55436	5.4196	4.43048	5.35414	4.835	5.23742	4.52308	5.08414	5.24582	4.39382	5.1382	4.94624	4.21257	4.1961	4.8159	5.30661	4.39201	4.40296	4.62407	4.88228	3.22793	4.0963
PVALB	4.24166	4.4615	4.69373	3.89172	4.34855	5.59388	4.43101	3.91921	3.69253	3.22793	4.39454	3.97993	4.4564	3.70161	4.32537	3.86212	4.06167	3.65887	4.52521	4.53275	3.7316	3.71694	3.65446	3.83318	4.99682	4.4562	4.70721	3.78525	4.37725	4.30943	4.46276	4.18675	4.0396	3.69926	4.34682	5.03038	4.18817	4.62439	4.33065	4.21257	3.22793	4.08697	3.22793	4.00154	4.64901	3.73836	3.22793	3.95211	3.22793
RASGRP2	7.4199	7.58596	8.30625	5.52687	5.75376	9.93757	6.78957	7.23658	6.66079	6.32491	7.11723	6.84779	6.01767	8.92281	8.42079	6.32549	7.20852	8.74094	6.16011	7.44337	7.04748	7.44905	7.72354	6.23465	9.12615	7.36189	8.61625	7.81399	7.47626	7.76105	7.63963	7.7536	8.44851	7.91503	8.0403	9.55505	7.53237	8.08071	7.93518	7.89025	7.69116	7.45627	5.47351	6.37471	7.60354	6.97598	6.70745	5.73473	5.65028
RBM24	5.80008	7.41144	5.9437	8.90941	7.63636	4.65791	6.70966	5.60673	7.65524	9.18311	4.89756	8.47619	5.78871	4.04126	9.53701	6.22102	4.63568	7.69913	6.16011	5.47382	7.82754	4.56891	8.15004	6.40319	4.44596	5.67283	5.24457	5.75267	9.09299	5.47056	8.62693	5.8305	9.19455	5.27297	5.17189	5.56076	5.20194	7.23797	5.84369	4.9937	5.89745	5.34059	5.988	8.44189	5.70249	8.64858	9.15461	7.30383	7.46379
RFX8	3.74255	4.39465	4.05441	3.22793	3.22793	4.10438	3.22793	3.91921	3.69253	3.69914	3.71496	3.97993	3.70423	4.16311	4.13093	3.22793	3.91177	4.34427	3.99339	4.16575	3.9367	3.71694	3.65446	3.22793	3.85035	4.27454	4.63692	3.78525	3.22793	3.77809	3.9551	3.91204	4.0396	3.69926	4.02876	4.02514	3.71465	4.13119	3.73063	3.72736	4.02325	4.32666	3.22793	3.22793	3.22793	3.73836	3.22793	3.22793	3.22793
RGS16	6.06229	8.18858	6.65935	5.45929	5.78614	7.05407	6.20456	5.50159	6.38116	6.04021	5.86274	6.00539	5.86935	9.22025	7.47944	6.46891	5.58524	8.41381	6.41294	6.46726	7.28034	6.90892	6.49763	5.47153	6.73433	6.23388	7.31232	6.12641	6.53922	6.61219	5.90243	6.1751	6.8506	6.06318	7.06171	7.11288	6.0411	6.66313	6.39824	6.46034	6.3818	6.69238	6.34097	6.66631	6.3022	6.4138	6.60063	5.76802	6.87885
RHOH	8.2073	8.35117	9.56009	6.75162	7.15913	10.3043	7.85382	8.29674	7.45166	7.37894	8.36158	8.07741	8.04826	9.42667	8.58304	7.85085	7.5019	9.43013	7.83039	8.36679	7.52656	9.15105	8.61852	7.56191	10.216	8.53862	9.45965	9.04496	8.06643	8.49941	7.54867	8.10288	8.45269	8.35854	8.51968	9.16289	8.94636	8.71996	8.89451	9.03133	8.77823	9.02334	7.99283	8.19237	8.84766	7.97646	8.14198	6.89788	7.47094
RIMS4	4.85603	5.04721	4.98983	5.55941	5.72059	4.60959	6.47152	4.19663	8.052	8.75822	4.29748	7.08885	6.58717	4.60277	9.14116	6.79256	4.29485	4.95759	6.48069	4.04357	4.8884	3.91627	6.40121	6.96731	4.29022	6.10802	4.29582	4.01134	7.67414	4.16981	7.47152	5.77339	8.31684	4.03729	3.88455	5.07655	4.29682	5.50002	4.68141	4.08466	5.74425	3.22793	4.22038	5.19267	4.96585	5.96267	6.28195	4.45787	4.50785
RN7SKP127	3.74255	4.69238	4.75934	4.26433	4.10441	4.32692	5.5369	5.88039	6.19789	5.7103	4.63905	5.47707	4.80561	4.79763	6.21799	6.34216	4.56057	3.22793	3.77233	4.91559	5.78707	4.56891	5.1383	6.07984	3.85035	5.89485	3.91241	4.65299	5.26257	4.16981	3.22793	3.91204	6.47237	5.73926	4.14885	4.8803	4.48193	4.23388	5.25845	4.93613	4.67351	4.4261	4.82376	4.11778	5.34541	5.53846	5.35346	4.71378	3.98273
ROPN1L	4.24166	4.39465	3.70941	3.22793	4.44976	4.10438	3.22793	3.22793	4.14561	3.69914	3.22793	3.66535	3.22793	4.16311	4.01306	3.22793	3.22793	4.41737	3.99339	3.22793	3.7316	3.91627	3.65446	3.22793	4.44596	3.89843	4.39274	4.32303	3.70743	4.43048	4.24597	3.71391	3.70064	3.69926	4.14885	3.88156	3.71465	4.01328	3.93534	3.22793	3.79382	3.93271	3.73144	4.00154	4.06996	4.10316	3.22793	4.11038	4.1953
RP11-1070N10.3	3.22793	4.24491	4.82136	3.89172	3.94715	4.2589	4.50915	3.91921	4.02592	3.89142	3.71496	4.0931	4.04567	3.70161	4.85706	4.53857	4.18638	5.47771	4.71074	3.8968	4.33271	3.22793	4.47317	3.96656	4.80744	4.36971	4.89511	3.78525	4.61861	4.16981	3.9551	4.39212	4.26706	4.15858	5.33101	4.64444	4.39382	5.21917	4.43041	3.72736	4.76505	4.94039	4.60629	4.30961	3.91863	4.34699	4.99199	3.95211	3.22793
RP11-10O17.1	3.74255	3.22793	3.90576	3.69935	3.22793	3.7873	3.22793	3.71905	3.22793	3.22793	3.22793	3.66535	3.70423	3.70161	3.68492	3.22793	4.06167	3.65887	3.22793	3.70299	3.22793	3.71694	3.82898	3.65746	3.22793	3.70415	3.71418	3.22793	3.22793	3.77809	3.9551	3.22793	3.70064	3.69926	3.69422	3.69207	3.91307	3.22793	3.93534	3.22793	3.79382	3.72874	3.22793	3.22793	3.91863	3.73836	3.90668	3.22793	3.22793
RP11-117D22.2	3.22793	4.06385	4.46911	3.89172	3.22793	5.77966	3.69391	3.71905	3.22793	3.69914	3.71496	3.66535	3.89854	4.60277	4.68698	3.67816	3.71372	4.41737	3.77233	3.8968	4.2207	3.22793	4.25471	3.83318	4.99682	3.70415	3.71418	3.78525	4.28151	4.0014	4.11399	4.18675	4.79464	3.22793	4.02876	4.82574	4.06324	4.13119	3.22793	4.32375	3.79382	4.4261	3.22793	4.39201	3.91863	3.94612	3.71007	3.22793	3.22793
RP11-13K12.1	5.30023	6.29025	5.26987	5.8477	4.5416	4.44973	6.47152	5.21758	6.60325	6.80395	4.70943	7.69712	5.02364	5.06345	8.06466	6.55702	5.96281	6.12299	5.24909	5.5082	6.99598	4.64443	6.4154	6.2017	4.99682	4.86375	4.06245	4.01134	7.67414	3.77809	6.87857	4.56106	7.86112	4.15858	4.2534	4.02514	3.22793	5.05162	4.75357	5.37772	4.67351	5.8651	4.88791	6.94102	4.64901	6.47342	7.30978	4.45787	4.69126
RP11-153M7.3	3.95196	4.32281	3.70941	3.22793	3.22793	4.2589	3.69391	3.71905	3.22793	3.22793	3.22793	3.97993	4.04567	4.04126	3.87157	3.86212	3.91177	4.34427	3.77233	4.16575	4.09179	3.71694	3.82898	3.96656	4.1016	3.89843	5.88649	3.22793	3.70743	3.22793	3.74481	4.18675	3.22793	3.8916	4.50994	4.02514	3.22793	3.87176	3.73063	3.72736	4.02325	3.22793	4.09152	4.30961	3.91863	3.22793	3.90668	3.22793	4.28386
RP11-164H13.1	3.22793	3.65025	5.783	3.22793	3.22793	5.79882	3.22793	3.71905	3.8822	3.22793	3.71496	3.66535	3.22793	4.04126	3.87157	3.67816	3.22793	5.29428	3.22793	3.22793	4.09179	3.22793	3.96147	3.65746	6.70993	3.22793	4.29582	3.22793	4.28151	3.22793	3.22793	4.06199	4.16122	3.22793	3.88455	6.54092	3.22793	4.23388	5.00407	4.42295	5.00277	3.22793	3.22793	3.86205	4.57328	3.94612	3.22793	4.11038	3.22793
RP11-18B16.2	3.22793	3.65025	3.70941	3.22793	3.22793	3.7873	3.22793	3.22793	3.22793	3.22793	3.22793	3.22793	3.70423	3.22793	3.22793	3.22793	3.22793	3.83514	3.22793	3.22793	3.7316	3.22793	3.22793	3.22793	3.22793	3.22793	4.18726	3.22793	3.22793	3.22793	3.22793	3.22793	3.70064	3.69926	3.69422	3.69207	3.22793	3.68506	3.22793	3.22793	3.79382	3.22793	3.73144	3.67811	3.22793	3.22793	3.22793	3.22793	3.22793
RP11-209E8.1	6.30517	5.04721	5.09033	5.2733	4.77733	4.39028	6.7368	7.92552	6.60325	7.30702	7.08307	6.57077	6.93198	5.15539	5.17883	5.98523	5.15274	3.96894	3.99339	6.20813	6.49898	6.23212	7.16508	7.90241	5.37208	6.86897	5.55315	6.62263	7.68152	6.03717	5.90243	6.46893	6.58453	6.28824	4.34682	5.43003	5.1083	5.09566	5.58294	5.41853	4.76505	5.38279	6.06612	5.23092	4.19583	4.62407	4.38331	8.13543	7.01262
RP11-212I21.2	4.54998	3.95433	3.90576	3.22793	3.94715	5.05354	4.43101	3.22793	3.22793	3.22793	4.56378	3.84421	3.22793	4.44996	4.4857	4.00161	3.22793	3.96894	3.22793	3.70299	3.7316	4.30169	3.22793	3.65746	4.44596	4.36971	3.71418	3.22793	3.22793	3.77809	3.74481	3.91204	4.16122	4.44419	4.34682	4.42648	3.71465	3.68506	4.94624	4.51301	4.84975	3.72874	3.22793	4.30961	4.06996	4.10316	3.22793	3.22793	3.667
RP11-21C4.1	4.24166	4.52416	3.90576	3.89172	3.22793	4.01419	3.88413	4.30616	4.34294	4.26388	3.71496	3.22793	3.22793	4.04126	4.01306	3.22793	4.39169	4.34427	3.77233	4.04357	4.33271	3.91627	3.96147	3.65746	4.1016	3.22793	4.06245	3.22793	3.903	4.0014	4.36058	3.91204	4.6001	4.15858	4.14885	4.42648	4.18817	4.5575	3.73063	3.72736	4.1961	4.87979	4.09152	3.67811	4.06996	3.73836	4.05552	3.74266	3.22793
RP11-229P13.20	3.74255	3.65025	4.05441	3.69935	3.22793	4.18521	3.22793	3.22793	3.69253	4.44387	3.71496	3.22793	3.22793	3.22793	4.01306	3.67816	3.22793	4.48538	3.77233	3.22793	3.7316	3.22793	4.07201	3.83318	3.85035	4.16799	4.18726	3.22793	4.05108	3.22793	4.46276	4.06199	4.0396	3.69926	4.2534	4.02514	3.71465	4.13119	3.73063	3.9308	3.79382	4.32666	3.93648	3.67811	3.22793	4.10316	3.22793	3.22793	3.667
RP11-265P11.2	3.22793	3.95433	3.70941	3.22793	3.22793	4.91086	3.88413	3.22793	3.22793	3.22793	3.22793	3.97993	3.22793	3.70161	4.13093	3.67816	3.22793	4.17787	3.22793	3.70299	3.22793	3.22793	3.82898	3.83318	4.99682	3.22793	3.91241	3.22793	3.22793	4.0014	3.74481	3.91204	4.52664	3.22793	3.69422	4.64444	3.22793	4.13119	3.22793	3.9308	4.1961	3.72874	3.73144	3.22793	3.22793	3.22793	3.71007	3.74266	3.667
RP11-274B18.2	3.74255	4.58323	3.90576	3.69935	3.22793	4.01419	3.88413	3.71905	3.69253	3.89142	4.06377	4.0931	3.22793	4.44996	4.23359	4.21915	4.18638	5.19178	4.29847	4.16575	4.33271	4.39909	3.82898	3.65746	3.22793	3.89843	5.77453	4.65299	4.05108	4.30943	3.9551	3.71391	3.70064	4.84839	4.77504	4.34188	4.77471	4.40917	4.21883	3.72736	4.1961	3.72874	3.22793	3.86205	3.91863	3.22793	3.22793	3.22793	3.22793
RP11-275I4.2	3.22793	3.82309	4.28571	3.22793	3.22793	3.91092	3.69391	3.22793	3.69253	3.22793	3.9135	3.66535	3.89854	3.70161	3.22793	3.22793	3.22793	3.83514	3.22793	3.22793	3.9367	3.22793	3.65446	3.83318	3.22793	3.70415	4.39274	3.22793	3.70743	3.22793	3.9551	3.71391	3.89351	3.22793	4.65055	4.70819	3.71465	4.13119	3.93534	3.22793	4.33929	4.32666	3.22793	3.86205	3.22793	4.10316	3.71007	3.22793	3.22793
RP11-290F20.3	4.1102	5.86979	4.98983	5.55941	6.09946	4.60959	4.88626	4.72099	5.79123	5.45843	4.70943	5.02372	5.92058	6.31843	5.7309	6.10812	4.56057	7.94614	5.88518	4.6065	6.14079	5.29754	5.5138	5.15015	4.69975	5.89485	8.61625	5.75267	5.80258	5.09135	5.80916	5.85819	5.01147	5.05532	6.76503	6.02955	5.05872	6.21864	5.11212	4.9937	5.78419	4.94039	5.7864	5.75218	4.78639	5.75078	6.61639	6.62363	6.52546
RP11-326C3.12	3.74255	4.24491	4.05441	3.89172	3.22793	4.2589	3.22793	3.22793	4.02592	3.22793	3.9135	3.84421	3.89854	4.16311	3.87157	3.22793	3.91177	4.95759	3.99339	3.8968	4.09179	4.06711	3.96147	3.65746	3.22793	3.22793	4.29582	3.78525	3.70743	4.43048	4.11399	3.91204	4.16122	3.22793	4.43176	4.02514	4.29682	4.48605	3.73063	3.9308	3.79382	3.22793	3.22793	3.67811	3.71863	3.73836	3.90668	3.22793	3.22793
RP11-330A16.1	3.22793	4.32281	4.69373	3.22793	3.22793	5.32484	3.88413	3.22793	3.22793	3.22793	3.22793	4.0931	3.89854	4.26915	4.23359	3.22793	3.71372	3.83514	3.22793	3.22793	3.7316	3.71694	4.07201	3.96656	4.29022	4.04554	4.06245	3.22793	3.903	3.22793	3.22793	3.71391	4.16122	3.69926	3.69422	4.57672	3.22793	3.68506	3.22793	3.22793	4.02325	3.22793	3.22793	3.22793	4.06996	3.94612	4.05552	3.22793	3.22793
RP11-345M22.1	4.24166	3.65025	4.82136	3.22793	3.22793	4.39028	4.14827	4.07066	3.22793	4.03708	4.4827	3.84421	3.70423	3.70161	3.87157	3.67816	4.06167	4.08055	3.22793	4.27206	3.9367	4.56891	3.65446	3.22793	4.80744	3.89843	4.18726	3.78525	3.903	4.0014	4.24597	4.06199	4.66882	4.03729	4.2534	4.24884	4.89658	3.87176	4.6042	4.08466	3.22793	4.59934	3.22793	3.22793	4.19583	3.73836	3.71007	3.95211	3.84652
RP11-355F16.1	3.95196	4.4615	4.17811	3.22793	4.23506	4.74861	4.64968	3.91921	3.8822	3.69914	4.39454	3.84421	3.70423	5.28182	4.90861	4.00161	4.06167	4.17787	4.52521	4.16575	4.33271	3.71694	4.25471	3.65746	4.1016	4.74387	4.39274	4.32303	4.28151	4.43048	4.11399	4.18675	4.66882	4.03729	4.02876	4.02514	3.91307	3.68506	4.33065	4.5958	4.46333	4.59934	3.93648	4.39201	4.06996	4.44807	4.47072	3.22793	3.667
RP11-396O20.2	4.45763	5.74106	5.66428	7.38012	7.02003	3.62469	9.83125	5.07349	9.02616	9.21529	3.9135	8.62959	9.54738	4.36387	8.49853	9.25723	4.18638	5.41938	8.57616	4.27206	8.79515	4.64443	8.79777	10.4243	3.85035	9.77271	5.05714	5.79118	8.91393	4.43048	8.61356	9.22951	8.6516	4.35846	4.58258	5.86581	4.83724	8.51065	4.94624	3.72736	9.23862	4.59934	9.00969	7.71797	5.1699	7.81854	7.76789	9.95855	8.59504
RP11-426C22.4	3.22793	3.82309	3.90576	3.22793	3.7391	4.18521	3.88413	3.71905	3.22793	3.22793	3.9135	3.66535	3.22793	3.22793	4.23359	3.67816	3.22793	3.96894	3.22793	3.22793	3.22793	3.22793	3.65446	3.22793	3.22793	3.89843	4.06245	4.01134	3.70743	3.77809	4.11399	3.71391	4.0396	3.22793	3.69422	3.22793	3.22793	3.22793	3.22793	3.22793	4.33929	3.22793	4.33237	3.86205	3.91863	3.73836	3.22793	3.22793	3.22793
RP11-456O19.4	3.22793	3.22793	4.05441	3.89172	3.22793	5.35172	3.22793	3.22793	3.22793	3.22793	3.71496	3.66535	3.70423	4.16311	3.22793	3.22793	3.22793	4.08055	3.22793	3.22793	3.22793	3.22793	3.96147	3.22793	4.29022	3.22793	4.06245	3.22793	3.22793	3.22793	3.74481	3.22793	3.89351	3.69926	3.22793	3.69207	3.71465	3.22793	3.73063	3.72736	4.33929	3.22793	3.73144	4.30961	3.71863	4.23364	3.71007	3.74266	3.22793
RP11-466A19.1	3.74255	3.22793	4.05441	3.69935	3.7391	3.22793	3.22793	3.22793	3.8822	3.89142	3.22793	3.66535	3.22793	3.22793	3.87157	3.86212	3.71372	3.96894	3.22793	3.22793	3.22793	3.22793	3.65446	3.22793	3.85035	3.22793	3.22793	3.22793	3.70743	3.22793	3.22793	3.22793	3.22793	3.22793	3.22793	4.14473	3.71465	3.87176	3.22793	3.22793	3.22793	3.22793	3.22793	3.22793	3.22793	3.73836	3.22793	3.22793	3.22793
RP11-476D10.1	3.22793	3.22793	3.22793	3.22793	3.7391	3.22793	3.22793	3.22793	3.22793	3.69914	3.22793	3.22793	3.22793	3.22793	3.22793	3.86212	3.22793	4.5491	3.22793	3.70299	3.22793	3.71694	3.65446	3.22793	3.85035	3.22793	4.29582	3.22793	3.22793	3.22793	3.22793	3.22793	3.22793	3.22793	3.88455	3.22793	3.71465	3.87176	3.73063	3.22793	3.22793	3.72874	4.22038	3.86205	3.22793	3.22793	3.71007	3.22793	3.22793
RP11-47G11.2	3.22793	3.22793	3.22793	3.22793	3.22793	3.22793	3.88413	3.91921	3.69253	4.03708	3.22793	3.84421	3.89854	3.22793	3.22793	3.22793	3.91177	3.22793	3.77233	3.22793	3.22793	3.71694	3.65446	3.22793	3.22793	3.70415	3.22793	3.22793	3.22793	3.77809	3.74481	3.22793	3.22793	3.69926	4.14885	3.69207	3.22793	3.22793	3.22793	3.72736	4.02325	3.22793	3.22793	3.22793	3.71863	3.73836	3.71007	3.22793	3.22793
RP11-47I22.2	3.74255	4.24491	4.17811	3.89172	4.10441	3.22793	3.69391	3.22793	3.69253	3.69914	4.06377	3.97993	3.89854	4.6716	4.01306	3.86212	4.18638	5.0407	3.77233	3.8968	4.09179	3.91627	3.65446	3.65746	4.1016	4.27454	5.77453	3.78525	4.05108	3.77809	4.24597	3.22793	4.0396	4.03729	5.17189	4.24884	4.39382	4.23388	4.21883	4.08466	4.02325	3.72874	4.22038	4.46789	3.91863	3.73836	3.22793	3.95211	3.667
RP11-493L12.4	3.22793	3.82309	4.17811	3.22793	3.22793	3.62469	3.69391	3.71905	3.69253	3.69914	3.22793	3.22793	3.22793	4.26915	3.22793	3.67816	3.22793	4.41737	3.77233	3.70299	3.7316	3.22793	3.96147	4.07783	5.23502	4.04554	3.91241	3.22793	4.05108	3.22793	4.24597	4.06199	4.0396	3.69926	3.22793	4.02514	3.71465	4.01328	3.73063	4.21257	3.22793	3.93271	3.73144	3.86205	3.91863	4.44807	3.22793	3.22793	3.667
RP11-493L12.5	3.74255	3.82309	3.90576	3.22793	4.23506	4.44973	3.22793	3.22793	3.8822	3.89142	3.22793	3.84421	3.22793	3.22793	3.22793	3.22793	3.22793	4.17787	3.22793	3.22793	3.22793	3.71694	3.96147	3.22793	4.29022	3.22793	4.18726	3.78525	4.1743	3.22793	4.64059	3.71391	4.6001	3.22793	3.88455	4.02514	3.22793	4.01328	3.73063	4.21257	4.1961	4.32666	4.09152	4.00154	3.71863	3.22793	3.71007	3.22793	3.22793
RP11-536O18.1	4.1102	4.58323	4.54942	3.69935	3.7391	4.01419	3.69391	3.22793	4.02592	3.22793	3.22793	3.22793	3.89854	4.60277	4.23359	4.21915	3.71372	4.8683	3.22793	4.04357	4.2207	3.91627	3.22793	3.83318	4.90591	3.70415	5.48254	3.22793	4.37725	3.77809	4.55545	4.18675	5.06006	4.03729	4.77504	4.24884	4.18817	3.87176	4.09015	3.22793	3.22793	3.72874	4.6836	3.67811	4.06996	3.94612	4.05552	3.22793	3.22793
RP11-553L6.2	3.74255	4.06385	4.28571	3.22793	3.7391	5.15061	4.02825	4.19663	3.8822	3.69914	3.71496	4.28003	4.04567	5.06345	3.87157	3.22793	3.71372	4.60915	3.22793	3.8968	3.22793	3.91627	4.16842	3.22793	4.44596	3.89843	4.18726	4.18178	3.70743	3.22793	3.9551	4.18675	4.66882	4.52308	4.50994	4.64444	4.06324	4.01328	4.09015	4.81189	4.02325	3.72874	3.73144	4.00154	3.91863	4.10316	3.71007	3.74266	3.667
RP11-598F7.5	4.54998	4.15938	3.70941	3.22793	3.22793	3.22793	3.22793	3.91921	3.8822	3.22793	3.71496	3.66535	3.22793	3.70161	4.01306	3.86212	3.91177	4.26497	3.77233	5.01942	4.2207	4.06711	3.65446	3.65746	4.44596	3.70415	5.40794	4.32303	3.903	4.72535	3.9551	4.06199	4.0396	3.69926	4.02876	3.88156	4.56297	4.48605	4.21883	4.21257	4.1961	5.05314	4.94875	3.67811	4.06996	3.22793	3.22793	3.95211	3.667
RP11-598F7.6	3.95196	4.06385	3.70941	3.69935	3.22793	4.01419	3.22793	3.22793	3.8822	3.69914	4.70943	3.66535	3.70423	3.89488	3.68492	3.22793	3.71372	4.08055	3.22793	4.96862	4.09179	4.19258	3.22793	3.22793	3.85035	3.70415	4.63692	4.18178	4.05108	4.30943	3.74481	3.91204	4.0396	3.22793	3.88455	3.69207	4.70854	4.48605	3.73063	3.72736	4.02325	4.74827	3.93648	3.22793	4.06996	4.10316	3.71007	3.22793	3.667
RP11-689B22.2	4.1102	4.58323	4.75934	4.15875	4.34855	4.65791	4.98866	3.91921	4.57798	4.03708	4.06377	4.79301	4.16814	4.60277	5.36663	4.39212	4.06167	5.32671	5.07393	4.6065	4.33271	4.30169	4.70593	3.65746	4.58046	5.57919	5.55315	3.78525	5.03444	4.43048	4.86255	4.29525	5.42923	4.26415	4.71453	5.20558	4.77471	5.85831	4.75357	4.32375	5.52461	4.67632	3.93648	4.00154	4.19583	4.44807	4.99199	4.11038	3.98273
RP11-693J15.5	3.95196	4.15938	5.8657	4.03744	3.94715	7.82841	4.93855	4.19663	3.69253	3.69914	4.06377	4.89075	4.53599	5.83146	5.05114	4.11787	3.91177	5.35834	4.41842	3.8968	4.2207	4.06711	5.17415	4.07783	6.9577	4.53578	4.95157	3.78525	5.68664	4.30943	4.86255	4.70645	5.71674	3.69926	4.34682	6.15595	4.18817	5.21917	4.94624	5.41853	5.74425	5.42367	3.73144	4.93469	5.42496	5.0286	4.82335	4.78728	3.667
RP11-701P16.5	3.22793	3.22793	3.70941	3.69935	3.22793	4.18521	3.22793	3.22793	3.8822	3.22793	3.22793	3.22793	3.70423	4.85578	3.68492	3.22793	3.22793	5.80502	3.22793	3.22793	3.7316	3.91627	4.07201	3.22793	3.85035	3.22793	6.86833	3.78525	3.70743	4.0014	3.22793	3.22793	4.0396	3.22793	5.85039	5.39522	3.22793	3.68506	3.22793	3.22793	3.22793	4.08697	3.73144	4.00154	3.22793	3.22793	3.90668	4.85634	5.65028
RP11-731F5.2	3.74255	3.65025	5.09033	3.69935	3.22793	6.02613	3.22793	3.22793	3.22793	3.22793	3.9135	4.43442	3.22793	4.85578	5.05114	3.86212	3.22793	4.60915	3.22793	3.8968	3.7316	3.71694	4.80604	3.65746	6.10489	4.04554	3.71418	3.22793	4.28151	3.22793	3.74481	4.06199	4.6001	3.22793	4.34682	4.64444	3.22793	4.01328	4.21883	4.08466	4.57365	4.74827	3.73144	4.66672	4.49169	4.34699	3.71007	3.22793	3.22793
RP11-861A13.4	4.85603	4.83833	6.94668	4.35866	4.34855	8.54272	5.08306	4.72099	4.14561	4.59601	4.06377	5.47707	4.53599	7.43581	6.23653	4.66685	5.10512	7.32664	4.41842	4.91559	5.16611	5.29754	6.08245	4.54504	8.06687	4.4562	6.7133	5.54172	5.93488	4.63583	5.26032	5.61911	6.87592	5.27297	5.60058	7.44095	5.37077	6.18079	6.06256	6.1457	6.16057	5.5392	4.88791	5.4392	5.9588	5.64881	4.17937	4.45787	4.69126
RP11-87C12.5	4.24166	4.39465	4.05441	3.22793	3.22793	4.18521	4.02825	3.22793	3.8822	4.03708	3.22793	3.84421	4.27471	3.89488	4.4857	4.11787	3.91177	3.83514	3.22793	4.04357	3.9367	3.91627	3.96147	4.07783	4.1016	3.89843	3.91241	4.01134	4.05108	4.0014	3.74481	3.91204	4.0396	3.69926	3.88455	4.76848	3.71465	4.13119	3.93534	4.08466	4.57365	4.32666	3.93648	3.86205	3.22793	3.73836	3.22793	3.74266	4.0963
RP11-960L18.1	3.95196	4.69238	5.35097	3.22793	4.23506	5.59388	4.14827	3.71905	4.42762	3.22793	4.39454	4.0931	4.27471	4.36387	4.95802	4.30972	4.29485	4.82099	4.62197	4.04357	3.9367	3.71694	4.59591	3.96656	4.69975	5.02337	5.99	4.44544	4.92992	4.0014	4.46276	4.29525	5.10682	4.03729	4.88724	5.20558	4.56297	4.90906	4.6042	4.08466	5.2014	4.99807	4.6836	4.39201	4.06996	4.44807	4.69559	3.74266	3.667
RP3-497J21.1	3.22793	3.22793	3.22793	3.22793	3.22793	3.22793	3.22793	3.22793	3.22793	3.22793	3.22793	3.66535	3.89854	3.70161	3.68492	3.67816	3.22793	3.22793	3.22793	3.70299	3.7316	3.22793	3.65446	3.22793	3.22793	3.22793	3.71418	3.22793	3.22793	3.22793	3.22793	3.22793	3.70064	3.22793	3.69422	3.22793	3.22793	3.22793	3.73063	3.9308	3.79382	3.22793	3.73144	3.22793	3.71863	3.22793	3.22793	3.22793	3.22793
RP4-555D20.2	3.95196	4.52416	5.66428	3.22793	3.94715	7.29679	4.02825	4.30616	4.24982	4.26388	4.63905	4.28003	4.04567	5.69185	5.591	4.53857	4.29485	5.63872	4.71074	4.27206	4.09179	3.71694	4.59591	3.83318	5.49608	5.02337	4.56175	3.78525	5.08352	5.09135	5.48329	5.61911	5.01147	5.10198	5.50582	5.46395	4.6382	5.05162	4.8214	5.33559	5.52461	5.05314	3.93648	4.39201	4.78639	5.13779	4.38331	3.74266	3.84652
RP5-1028K7.2	3.95196	4.52416	5.783	5.42415	5.81777	6.73252	4.83154	4.07066	4.24982	4.72907	3.22793	4.50329	4.04567	6.00569	5.36663	4.30972	3.71372	5.97315	3.77233	3.70299	5.06245	4.06711	5.61835	4.07783	7.07665	4.04554	5.0055	4.18178	5.08352	4.63583	5.35414	5.65141	5.31759	4.15858	5.68907	7.22133	4.6382	5.40166	4.68141	4.93613	4.92871	4.94039	4.6836	5.96343	4.90901	4.62407	5.84154	4.11038	4.50785
RP5-1071N3.1	4.45763	4.15938	4.88022	4.03744	4.10441	5.70023	4.34612	4.07066	3.69253	4.44387	4.56378	4.36038	3.89854	4.85578	4.62401	3.22793	4.18638	4.48538	4.52521	4.27206	3.9367	3.91627	4.59591	3.65746	4.80744	4.36971	4.83581	4.32303	4.28151	4.0014	3.74481	4.48012	4.26706	4.72945	4.50994	4.82574	4.6382	5.09566	3.93534	4.32375	4.67351	5.205	3.73144	4.6045	4.64901	4.44807	4.55112	3.74266	4.0963
S100A12	3.22793	4.63918	4.28571	3.22793	4.10441	4.01419	3.22793	3.22793	4.02592	3.69914	3.9135	3.66535	3.22793	7.01286	4.01306	5.02699	3.22793	7.10531	3.77233	3.22793	3.22793	4.90374	4.16842	3.65746	3.22793	3.22793	7.85906	4.01134	4.05108	4.30943	3.9551	3.22793	4.36161	3.69926	5.03782	3.69207	4.06324	4.13119	3.93534	4.21257	3.22793	3.22793	4.52295	4.21905	3.71863	3.73836	3.90668	4.45787	4.50785
S100A3	4.24166	4.74315	4.54942	3.89172	4.34855	4.87236	4.93855	3.91921	4.42762	4.44387	3.71496	4.19176	3.70423	5.15539	4.80313	5.1534	4.39169	6.45351	4.86968	3.70299	5.47412	4.39909	5.40029	3.65746	4.90591	4.53578	7.044	4.90523	5.13073	4.0014	5.52367	5.19931	6.02436	4.66492	5.50582	5.07655	4.6382	4.85749	4.6042	4.42295	3.79382	4.51637	4.82376	4.83484	4.40296	4.90868	5.5367	3.22793	4.36448
S100A8	5.51525	7.76323	8.00248	5.00712	6.62459	6.41712	5.21244	6.40216	6.00946	6.14868	7.08307	5.94432	6.42174	10.4498	6.18014	7.99848	6.37674	11.6871	6.45847	6.05802	6.1646	8.33439	6.68444	5.41331	5.90154	6.01731	12.0543	7.48892	4.75352	6.50565	5.60092	5.44473	6.15577	7.42283	8.40662	6.47831	7.17077	7.35164	7.54834	7.25854	7.28005	5.77529	8.42454	6.57094	5.85077	5.99043	5.31351	7.68895	8.89728
S100A9	6.41244	9.19732	8.48666	7.25177	8.00064	7.60837	6.88958	6.59641	7.43537	7.52867	7.20453	7.27084	8.01986	11.3089	7.64613	9.57695	7.48468	12.8498	7.98467	7.06523	7.97395	9.05406	8.18321	6.2983	8.87167	8.00789	13.3283	8.42661	7.29561	7.66609	7.63079	7.43277	7.69408	7.86588	9.78224	8.23426	8.47786	9.4169	8.37582	8.57093	8.64769	8.43847	9.52071	8.22381	6.98175	7.7082	7.34783	9.09415	9.89978
S1PR3	7.28103	8.38299	7.80566	5.10229	6.55264	9.45193	6.98303	7.0088	6.91796	6.96496	6.06638	6.02517	6.38619	8.6427	8.06466	7.04595	6.85258	8.4868	7.05343	7.54215	9.3613	7.21496	7.65419	6.44586	7.52945	6.90685	8.50538	7.57734	7.73919	7.44354	7.28106	7.11172	7.98783	7.40571	7.59271	8.006	7.90124	7.36003	7.25369	7.23693	7.85508	7.62452	7.00822	7.06575	8.27922	7.64112	7.95789	5.152	6.48332
S1PR4	5.2526	5.82821	6.318	4.79073	4.5416	6.83592	5.40254	4.65014	5.46582	5.55853	5.29027	5.61654	5.76073	6.29963	6.2729	5.64683	5.32712	6.75544	4.86968	5.88965	5.26188	5.72643	6.23493	5.63224	7.18645	5.869	6.78587	5.63011	4.98331	5.26774	5.04895	5.88532	5.8534	5.62184	6.50511	6.84312	5.96693	6.27357	5.95747	5.76962	5.57151	5.83582	6.09121	5.72655	5.42496	5.2382	5.5367	4.6351	4.43876
SBSN	3.22793	3.22793	3.22793	3.22793	3.22793	3.22793	3.22793	3.22793	3.69253	3.22793	3.71496	3.22793	3.89854	3.22793	3.68492	3.67816	3.22793	3.83514	3.22793	3.22793	3.9367	3.22793	3.65446	3.22793	3.22793	3.22793	4.56175	3.22793	3.22793	3.22793	3.74481	4.63619	3.89351	3.22793	3.22793	3.69207	3.22793	3.87176	3.22793	3.9308	3.79382	3.93271	4.43227	3.86205	3.22793	3.73836	3.90668	3.22793	3.22793
SELE	4.78698	5.69529	5.18329	4.90386	5.0868	5.85471	4.71363	6.2205	5.16572	4.95589	3.9135	4.62859	5.02364	9.85597	4.80313	5.11268	4.70591	9.34486	5.24909	4.96862	6.25596	6.63468	6.49763	5.22119	5.23502	5.16449	8.82898	4.01134	4.54429	4.88556	4.64059	5.19931	5.56471	4.03729	6.10437	4.82574	4.56297	5.92911	6.68537	5.29204	5.37302	5.25181	9.33743	6.18417	4.40296	5.0286	4.62577	6.49323	7.48513
SELL	7.152	8.7594	9.64036	6.68185	7.56554	11.6677	7.65605	7.31842	7.40222	7.92633	7.04807	8.24378	7.04949	10.2384	9.57157	7.37778	7.23968	10.904	7.3214	7.14088	7.87802	8.17519	9.21728	7.08815	11.4618	7.69956	10.9926	8.06374	8.44098	6.95678	7.85982	8.6766	9.40792	8.25266	8.85125	10.6556	8.36924	8.86795	8.3658	8.83027	9.34613	8.83796	8.29274	9.48149	8.56024	8.69472	7.84295	7.28157	8.41441
SELP	7.82522	8.23583	7.63999	6.84388	7.07219	8.97783	6.65377	7.33817	7.29789	6.08462	7.31648	6.95322	6.36807	8.83857	7.20035	7.4016	7.28021	9.04237	6.81326	7.55797	8.42058	8.0145	7.58754	6.68971	8.1946	6.04055	10.0942	7.87627	7.41559	7.32407	7.48139	7.17766	7.4806	8.39362	9.48905	8.15223	7.13792	7.41736	8.13145	7.18142	6.995	8.22943	9.01934	7.53648	8.59334	7.42872	7.02259	7.23598	6.87885
SERPINA5	4.45763	4.39465	6.54902	4.35866	4.62598	7.58707	4.98866	4.72099	5.76469	4.79008	4.83819	4.28003	4.53599	5.50266	5.99582	5.47108	4.89368	5.0407	4.52521	4.53275	7.04748	4.56891	5.5671	4.48149	6.3788	5.61114	6.06284	4.18178	5.22013	4.53823	5.15908	4.70645	4.90801	4.52308	5.36789	5.46395	5.40974	5.90591	4.88547	5.37772	5.57151	5.205	4.82376	5.02683	5.30374	4.70224	4.38331	4.24186	3.84652
SERPINB7	3.74255	4.15938	4.17811	4.15875	3.7391	3.91092	3.69391	3.71905	3.8822	3.22793	3.71496	6.93275	3.70423	3.70161	4.01306	3.22793	3.22793	8.26363	3.77233	3.22793	5.2149	3.71694	4.70593	4.07783	4.99682	3.22793	4.77333	3.22793	4.1743	3.22793	3.9551	3.71391	3.89351	3.69926	9.96009	5.20558	3.91307	6.36057	3.22793	3.9308	3.22793	4.08697	6.21029	7.13377	4.57328	6.60345	4.99199	6.86823	3.667
SERPINE1	6.08858	9.88342	7.69246	6.21095	8.69877	7.08486	6.20456	6.49378	6.85789	5.97081	6.28498	8.03023	7.31626	7.61192	8.18716	6.62646	6.19584	8.98116	7.05343	5.24614	6.5357	9.18917	8.05019	7.015	5.49608	7.68516	10.5787	7.7957	7.04365	6.61219	6.17438	6.30011	9.89996	7.0782	8.6707	7.63848	7.19225	8.22505	6.96466	6.30134	7.57417	6.60982	8.79424	7.70529	5.9588	6.39335	9.28737	6.55059	7.71317
SFRP2	6.18901	6.07838	5.18329	4.4444	4.70423	4.9843	3.22793	5.34697	6.6887	4.15834	4.18877	4.36038	3.22793	6.35531	4.85706	3.86212	6.03692	4.99985	5.54081	5.5082	5.90588	4.06711	4.89813	4.07783	5.9865	4.53578	7.10184	5.49522	5.4196	7.85012	4.79327	5.91193	4.44755	6.9773	5.63073	5.49701	6.71566	5.00593	4.8214	4.32375	5.93321	4.67632	5.7864	3.86205	6.64301	6.09624	5.09259	3.95211	4.36448
SHC3	4.85603	5.35219	4.46911	3.69935	3.7391	4.39028	4.43101	4.57436	4.24982	3.89142	4.29748	3.66535	4.27471	4.52919	4.40884	4.11787	4.18638	4.48538	3.99339	4.53275	4.82424	4.30169	3.96147	3.65746	3.85035	3.70415	5.0055	4.65299	3.903	4.16981	4.36058	4.29525	3.89351	4.44419	4.71453	4.24884	4.39382	3.68506	3.93534	4.51301	4.46333	4.4261	5.11482	4.00154	4.06996	3.73836	4.05552	3.74266	3.98273
SIGLEC14	5.92282	6.83535	6.77576	4.84867	5.6159	3.62469	3.22793	5.50159	5.62356	5.68129	5.20305	5.38573	5.81612	7.20531	6.60688	6.82828	5.40619	7.58326	6.62719	5.75535	6.51746	6.31441	6.83907	6.04296	6.89429	5.61114	8.04099	7.00535	6.53922	6.52761	5.98977	6.61969	6.65952	5.68183	5.77212	6.36158	6.91025	6.79318	6.3163	5.73836	6.24768	6.02881	5.54963	5.70043	6.87755	6.54918	7.12486	5.55474	5.59719
SIGLEC5	5.73431	6.3639	6.23853	4.52331	5.33392	8.34793	5.5993	4.85057	4.98397	5.45843	5.05977	4.98101	4.80561	6.39124	6.03895	6.14678	5.40619	7.06029	6.16011	5.81067	5.90588	6.05141	5.91112	5.47153	6.75831	5.81577	7.95603	6.8714	6.24946	5.97389	5.67396	6.13082	5.31759	5.73926	5.92442	6.36158	6.22146	6.3436	5.54649	4.93613	5.52461	5.64549	5.81708	5.91922	5.49996	5.96267	5.99629	4.92155	5.39268
SIRPB1	5.20313	6.43388	6.51585	4.5966	4.62598	7.46395	4.71363	5.64002	5.03198	4.59601	5.68731	5.14362	5.29165	6.70772	5.05114	6.00648	5.40619	7.20793	5.66561	5.63745	5.72354	7.05834	5.9899	5.55431	6.31518	6.33074	9.27928	8.02502	6.34658	5.51671	4.55545	4.63619	5.90445	6.26921	6.56713	5.93838	5.86138	6.03958	6.63578	5.80018	5.57151	5.74399	5.75501	6.08816	5.98453	5.13779	5.09259	5.3006	5.67606
SIX4	4.85603	5.04721	4.98983	4.03744	3.94715	4.50581	4.14827	4.49271	4.14561	4.03708	4.63905	3.97993	4.27471	4.91117	4.74655	4.46801	4.70591	5.11852	4.52521	4.36703	5.16611	4.56891	4.47317	4.2617	4.1016	3.22793	5.40794	4.44544	4.98331	4.63583	4.71954	4.06199	4.96085	4.59636	4.34682	4.64444	4.39382	4.62439	4.6042	5.10126	4.76505	5.46331	4.94875	4.46789	4.57328	4.77526	5.5367	3.74266	3.84652
SLC11A1	4.24166	5.78533	4.93628	5.10229	4.97242	4.91086	4.34612	4.65014	5.56269	4.59601	4.77563	5.64277	5.40713	6.95445	5.36663	5.61909	4.70591	7.84391	5.13507	4.45333	5.62227	5.5642	5.48633	5.28846	4.69975	5.40682	9.07596	5.04754	5.52612	4.72535	5.04895	5.48149	5.10682	4.59636	6.1253	5.24582	5.15599	5.29529	4.68141	4.87565	4.84975	4.67632	6.04056	5.40672	4.30527	4.70224	5.99629	5.34654	5.8212
SLC1A2	4.45763	4.58323	6.318	4.15875	4.23506	7.92485	4.02825	5.17136	4.57798	4.90317	4.89756	4.8429	4.04567	6.05168	4.85706	4.39212	4.18638	5.68836	4.41842	4.80181	5.06245	4.96044	4.80604	4.17486	5.76332	4.16799	5.36899	5.54172	4.1743	5.09135	4.79327	4.70645	4.66882	4.52308	4.58258	4.76848	5.15599	5.05162	5.11212	5.15172	5.13864	5.29696	4.82376	5.07042	5.70249	5.28559	4.05552	3.95211	3.84652
SLC1A3	4.98304	6.97252	6.89624	4.84867	6.26732	7.83745	6.47152	4.78761	5.68179	6.1694	4.70943	5.74287	6.21405	7.32978	7.29954	7.26974	5.77258	7.95597	6.56625	5.78329	7.00903	5.5642	6.76386	5.88476	6.63413	6.21367	6.79995	5.23424	6.61879	5.68683	5.98977	5.85819	6.13471	5.4238	6.64102	6.49423	6.08843	7.31762	6.93771	6.16902	7.12201	6.81523	6.65641	8.15091	5.85077	7.00303	9.46608	6.28317	6.18241
SLC26A2	14.2441	14.5656	13.82	13.4278	14.2184	13.1966	17.1187	14.2328	17.3061	17.9049	14.1056	16.4532	16.9542	12.2418	16.4726	16.9737	14.2421	12.9033	17.1918	13.8731	16.673	13.734	16.3912	17.5828	13.3472	16.1435	11.7722	12.7429	16.0291	13.5524	15.9912	16.7229	15.7038	12.7056	10.5617	11.6786	13.0136	14.6424	13.1544	13.8667	17.398	13.2507	17.3744	16.1968	13.8843	16.5884	15.8684	17.1803	15.8628
SLC26A9	3.22793	3.82309	3.90576	3.22793	3.22793	4.44973	3.22793	3.22793	3.69253	3.89142	3.22793	3.97993	3.70423	3.70161	3.68492	3.22793	3.71372	3.83514	3.77233	3.70299	4.09179	3.22793	3.65446	3.65746	4.58046	3.70415	5.83166	4.18178	3.70743	4.0014	3.22793	3.71391	3.70064	3.22793	4.2534	3.22793	3.22793	3.68506	3.73063	3.22793	3.22793	3.22793	3.22793	4.21905	4.06996	3.22793	3.71007	3.74266	3.84652
SLC2A3	8.68408	11.015	9.59195	6.69608	9.14902	10.3051	8.13288	8.75069	8.73227	8.08497	8.43537	8.57149	8.098	10.6276	9.34423	8.32694	8.26174	10.3448	8.5504	9.20354	8.97796	9.6997	8.97384	7.6787	10.1768	8.8695	11.9343	9.81246	9.1709	9.56834	8.4324	8.71397	9.76846	9.03082	9.49301	9.28105	9.15968	9.25383	9.04337	9.15993	9.03679	9.11226	8.87443	9.3039	9.22553	8.66973	9.67812	7.74688	8.59177
SLC5A5	3.95196	3.95433	4.28571	3.69935	3.22793	4.9843	3.22793	3.22793	3.22793	3.89142	3.22793	3.66535	3.70423	4.85578	3.87157	4.21915	4.18638	3.96894	3.77233	3.22793	4.09179	4.19258	4.16842	3.22793	3.85035	3.89843	4.29582	4.32303	3.903	3.22793	4.36058	3.22793	4.26706	4.15858	3.88455	4.14473	3.71465	3.68506	4.43041	4.21257	3.79382	4.21521	3.73144	3.67811	4.06996	3.94612	4.05552	3.74266	3.667
SNAI1	5.70019	6.70624	5.63289	5.2733	5.9658	5.11908	5.29188	5.21758	5.32447	5.526	4.77563	5.2875	4.16814	6.94248	6.44182	5.19284	5.00399	6.67382	5.58371	5.63745	5.87713	6.12195	5.27598	4.60494	5.23502	4.91936	8.18658	6.34632	5.83008	5.87317	5.70905	5.40692	6.82483	5.59082	6.53646	5.86581	5.20194	6.21864	5.653	4.81189	5.13864	5.25181	5.81708	5.33924	4.71981	5.0286	6.22103	5.34654	5.65028
SNX22	5.09795	5.32169	7.00732	4.35866	5.24075	7.115	4.58175	5.07349	4.70955	5.05489	4.63905	5.3538	4.16814	6.18116	6.76739	4.46801	4.9501	6.29011	4.52521	5.24614	5.06245	5.49336	6.21879	4.9088	7.73575	5.11921	6.2813	5.39701	6.03227	5.64628	6.09824	5.74391	7.2	5.65217	5.33101	7.48111	6.49009	6.32641	6.18364	6.04828	5.70309	6.22075	4.22038	5.59058	6.08293	5.93433	5.75708	4.35606	4.1953
SNX29P2	5.47497	4.32281	6.44707	3.89172	3.7391	7.24328	5.08306	5.46461	4.57798	4.66456	5.10938	5.32108	4.7441	5.53611	5.49946	4.30972	5.65062	5.97315	4.62197	5.96434	4.75631	4.56891	5.37031	4.54504	7.30474	4.60968	4.95157	4.90523	5.26257	5.56131	4.86255	4.18675	5.74519	4.95631	4.77504	6.4128	5.44759	5.21917	5.78306	5.20024	5.2014	4.8159	4.22038	4.78152	5.46299	5.08439	4.99199	4.24186	3.84652
SP140	7.16422	7.71398	9.20843	5.94784	6.72608	10.6011	7.74511	7.46031	6.80795	6.62237	7.69316	7.67887	7.61135	8.88287	8.47949	7.3937	6.90549	9.05614	7.60837	7.89948	7.21438	7.82668	8.41724	6.4598	9.93721	8.21737	9.16778	8.17405	8.1904	7.86729	7.59487	8.06286	8.6661	7.91503	8.50798	9.08186	8.49949	8.71018	8.25066	8.57952	8.51571	9.25646	7.62195	8.75932	8.47843	8.16718	7.94556	6.45365	5.75057
SPATC1	3.22793	4.24491	4.05441	3.89172	4.44976	4.55898	4.14827	3.71905	3.69253	3.69914	3.71496	3.97993	4.04567	4.04126	4.68698	3.86212	3.71372	4.34427	3.22793	4.16575	3.7316	3.22793	3.65446	3.83318	4.29022	4.04554	4.63692	4.32303	4.05108	3.22793	3.74481	3.71391	3.70064	3.8916	4.02876	4.24884	4.29682	4.01328	4.21883	4.08466	3.22793	4.59934	3.73144	3.86205	3.22793	3.22793	3.71007	3.22793	3.22793
SPHK1	5.95187	6.13021	6.87033	5.79474	5.99358	6.49994	5.50457	5.76551	5.96387	5.59029	6.50897	5.81337	6.29318	6.9781	6.06002	6.35865	6.10726	7.47102	6.29221	6.03519	6.36236	6.74197	5.82755	5.8422	6.3788	6.61766	8.47082	8.75457	6.00856	7.69524	6.12409	6.01351	5.90445	5.97138	7.67184	7.24019	8.24153	6.53493	6.06256	6.56882	6.03525	5.46331	6.38196	5.85011	5.53592	5.41812	6.37794	6.39212	5.42391
SPP1	7.46992	7.38368	8.03764	5.71122	6.9659	7.18058	6.80246	7.34794	7.40222	6.01746	7.22555	6.13823	6.21405	8.68263	8.24245	7.99328	7.69387	8.31418	7.33357	7.82957	10.2508	7.69642	7.17338	6.11576	7.18645	7.60327	11.577	7.80487	7.73919	7.75183	7.83696	7.96077	7.34264	7.87832	8.56178	7.71451	7.09291	7.36836	7.57473	8.15453	7.88216	7.22205	7.54369	6.99432	7.63572	7.7956	8.73904	8.02614	7.94111
STAP1	5.66518	6.4063	8.08883	4.72971	5.81777	9.30512	6.97168	5.30527	6.19789	6.04021	5.71817	6.63576	5.67317	7.62691	7.06326	6.10812	6.23811	7.98508	6.89789	6.16687	6.44204	5.52925	7.0252	5.15015	8.59586	6.69204	7.51291	6.39629	7.27623	6.41422	6.93733	6.86696	7.76324	6.41465	7.19462	8.07574	6.38118	7.62623	6.77962	7.01346	7.45886	8.0233	6.32002	6.63971	6.59437	7.22592	6.45028	5.3006	5.39268
STAR	3.74255	3.82309	4.28571	3.69935	3.94715	5.45398	3.69391	3.22793	3.22793	4.03708	3.22793	3.97993	3.70423	3.89488	4.01306	3.22793	3.22793	4.17787	3.22793	3.22793	3.22793	3.71694	4.25471	3.83318	4.29022	3.89843	4.06245	3.78525	3.903	4.0014	3.9551	3.91204	4.16122	3.8916	4.02876	4.14473	3.71465	3.87176	4.09015	3.9308	3.79382	4.32666	3.22793	4.30961	3.91863	3.22793	3.22793	3.22793	3.22793
STC1	6.37051	7.01848	6.27883	4.79073	6.49618	6.07367	5.50457	6.49378	6.7693	4.79008	5.91654	5.90204	5.67317	8.90452	6.44182	5.43938	5.9372	7.21615	6.86464	6.86288	7.07255	6.78558	5.61835	5.25526	4.90591	5.81577	8.78396	7.22697	6.55549	6.48334	6.86349	6.33941	6.21709	6.28824	6.85451	6.32637	5.65444	8.14019	6.70152	5.80018	5.61682	4.99807	8.38526	5.53208	6.64301	6.70613	7.0575	5.34654	5.99347
STC2	5.30023	6.24413	6.04126	7.34461	6.04753	4.9843	4.58175	5.12339	5.59347	5.35009	5.4488	5.3538	4.27471	8.15192	6.25483	5.26822	4.9501	6.36674	4.86968	4.96862	6.25596	6.50122	5.5671	5.22119	5.37208	4.86375	7.044	5.11292	5.62472	6.2909	5.70905	4.56106	6.19695	5.4238	5.77212	5.39522	5.05872	5.97436	5.54649	4.81189	4.46333	5.97638	5.988	5.53208	5.02012	5.57626	5.42985	4.98337	6.10989
STRA6	3.95196	4.32281	4.88022	3.69935	4.34855	6.16412	3.69391	3.71905	4.02592	4.26388	3.71496	3.97993	3.89854	4.85578	4.40884	3.67816	3.71372	5.11852	4.16016	3.70299	4.60671	4.19258	4.80604	3.65746	4.58046	4.04554	4.29582	4.01134	4.37725	3.77809	4.64059	4.29525	4.36161	3.8916	6.14593	5.20558	3.91307	5.05162	3.73063	4.67261	4.33929	4.08697	6.06612	5.6738	4.71981	4.23364	5.04332	3.74266	4.1953
STX11	6.60522	7.3696	7.00732	5.6822	6.4172	6.89802	5.99326	6.17672	6.44826	6.41403	6.28498	6.00539	6.27381	7.89788	6.62097	6.59909	6.23811	8.13973	6.36588	6.56521	6.57149	7.39401	6.45711	6.13337	6.60793	6.58677	8.32365	6.90609	6.10106	6.78585	5.7766	6.08508	6.29488	6.4821	6.9387	6.76687	7.37238	7.61927	6.82451	6.88011	6.701	6.92831	6.62275	7.18961	6.32235	6.01765	7.14663	5.59272	5.75057
TAGAP	9.05158	10.2191	9.42511	6.63828	8.20062	10.0192	8.4503	8.81534	8.46634	7.93826	8.75643	8.15422	8.19769	9.26874	8.88461	8.21069	7.97826	10.1447	8.55559	8.7809	7.87092	9.34439	8.47529	7.78671	9.79199	8.77423	10.7085	9.66677	8.6126	8.99691	7.64841	8.07441	8.87396	9.01402	8.98942	8.99045	9.34547	9.18024	9.18969	9.16279	8.86214	9.27252	8.50463	8.7501	9.06082	8.5516	9.18111	7.48027	8.36931
TCL1A	3.22793	4.24491	9.12377	4.84867	4.84603	8.57277	4.64968	3.71905	3.8822	4.26388	4.29748	4.56781	3.89854	5.50266	5.53068	4.00161	3.71372	8.53349	3.77233	4.16575	3.7316	4.06711	6.84949	4.17486	9.42649	3.70415	5.5871	4.01134	5.26257	3.77809	5.26032	4.89427	6.83777	4.15858	5.56974	9.63887	4.18817	6.10187	7.04258	6.4028	6.24768	3.22793	3.73144	5.07042	6.0098	4.97013	3.71007	4.55024	4.50785
TCL6	3.22793	4.32281	6.04126	4.35866	4.5416	5.40385	4.71363	3.22793	4.42762	4.59601	4.18877	4.62859	4.16814	4.16311	4.74655	4.78166	4.47966	5.35834	4.41842	4.04357	4.43264	4.64443	4.94161	4.76702	5.16055	3.70415	4.18726	4.01134	4.68812	3.22793	4.46276	4.39212	4.6001	3.22793	4.02876	4.9824	3.71465	4.01328	4.52097	4.51301	4.46333	3.93271	3.73144	4.46789	5.38579	4.70224	4.28711	3.74266	4.1953
TDO2	6.62313	7.86198	8.08883	4.4444	5.93744	9.69723	6.38804	5.88039	6.39824	5.23187	6.64071	6.17396	6.43918	10.3338	6.82927	6.08838	6.94392	8.85559	7.28427	7.86176	6.6572	8.61611	7.01599	6.4598	8.79893	7.21902	9.4923	7.7489	6.30853	8.30536	6.48341	6.79859	6.70269	7.89679	8.74566	8.15223	7.63775	7.40121	7.90086	7.6584	8.22295	8.7258	7.31138	7.55782	7.77225	6.28641	6.24163	5.55474	5.79806
TENM4	5.15164	6.76147	6.67443	4.52331	4.44976	8.21216	5.8988	5.17136	5.46582	5.55853	5.68731	5.92334	5.4788	5.98211	6.80484	5.53227	5.36726	8.05536	5.30248	6.14577	6.40277	5.81519	6.68444	5.8422	7.27193	5.78836	6.15437	6.26785	5.98443	5.80166	5.74325	5.91193	6.17651	5.14695	6.45675	6.37886	6.32339	6.39392	5.1628	6.19196	6.03525	6.19816	6.04056	6.71806	5.70249	6.09624	6.22103	4.35606	5.18761
TEX41	3.95196	3.95433	3.70941	3.22793	3.7391	3.62469	3.88413	4.07066	3.69253	3.69914	3.71496	3.22793	3.70423	3.22793	4.13093	3.86212	3.91177	4.08055	4.16016	3.70299	3.7316	3.91627	3.65446	3.83318	3.22793	4.16799	3.91241	3.22793	3.70743	4.43048	4.11399	4.18675	3.70064	3.69926	3.22793	3.22793	3.22793	3.87176	3.93534	3.9308	3.22793	4.08697	3.73144	3.67811	4.06996	3.94612	4.17937	3.22793	3.22793
THBS2	6.65828	8.77813	6.48188	5.00712	5.3781	6.76148	5.17077	6.30415	6.6887	5.68129	5.83502	5.64277	4.864	6.72183	6.32574	5.11268	6.27914	6.70938	5.19336	6.46726	8.60725	6.14469	6.15228	4.86343	6.43966	5.96962	8.17589	8.92399	6.92396	7.34878	6.59757	6.66657	7.36063	7.15203	8.42747	7.05007	6.75965	7.0945	5.9845	6.42224	7.22458	5.61099	7.74359	4.78152	7.28607	7.23735	5.50203	4.85634	5.32788
TLR10	6.47309	7.00027	9.1265	4.90386	6.49618	11.0845	7.08133	5.53757	5.56269	6.63719	6.01822	6.95322	5.78871	9.17771	8.27817	5.674	6.27914	8.85033	5.81585	6.50067	6.64046	6.96049	8.39972	5.7059	10.2893	6.23388	7.9308	7.67071	7.76719	7.20731	6.95165	7.21999	8.62216	6.95387	7.28907	8.86285	7.25485	7.82071	7.62611	8.10184	8.19445	8.44321	5.00665	8.23267	8.05391	7.7082	6.69267	5.73473	5.32788
TLR2	8.47024	8.621	8.7388	6.06359	7.60139	8.9448	8.01119	8.70592	7.96401	7.58293	8.70517	7.27084	7.51686	9.81737	8.28257	8.17895	8.48127	9.68019	7.68625	8.67989	8.20608	9.33471	7.71789	7.34824	8.2033	7.82306	9.73902	9.14578	8.11077	8.73724	7.56733	7.64927	7.36954	8.72495	8.00742	7.3571	8.90158	8.56589	8.47706	8.54924	8.86666	9.17339	8.19387	8.41102	8.92118	8.48632	8.6355	7.07691	8.00152
TMEM132A	6.45316	8.20846	6.80342	7.54558	7.1101	6.97407	6.47152	6.06085	7.19509	6.94135	6.43819	7.41031	6.5233	6.66453	6.90013	6.61285	6.48557	8.58189	6.75995	6.62694	7.72882	6.18909	7.43729	6.11576	6.87251	6.48986	9.00831	6.7808	6.82041	6.65266	7.15083	7.00674	6.88841	6.8306	8.09348	7.49686	6.98614	8.11571	6.60174	6.4028	6.9614	6.54012	8.01231	7.5002	6.05898	6.47342	6.73654	6.16504	6.8571
TMEM163	4.24166	4.79173	6.64411	3.22793	4.62598	7.79168	4.34612	4.19663	4.42762	5.18991	4.06377	4.50329	4.04567	5.50266	5.21866	4.83499	3.22793	5.93301	3.99339	4.27206	4.68404	3.71694	5.61835	4.81623	6.91574	4.27454	6.74278	4.82715	5.26257	4.53823	4.92796	4.06199	4.66882	3.69926	5.90019	6.02955	4.95308	5.62074	4.6042	5.20024	5.26119	5.05314	4.88791	5.89656	4.90901	4.44807	5.27229	4.45787	4.1953
TMEM178B	5.47497	6.07838	6.46458	4.79073	5.28818	8.49786	5.25277	5.46461	5.46582	5.23187	5.48561	5.2875	4.67904	7.13351	6.23653	5.26822	5.82968	6.12299	4.41842	5.78329	7.73666	5.41851	6.28227	4.9088	6.8051	4.4562	6.34069	4.74343	5.49156	5.26774	5.60092	5.05623	5.77306	5.76708	5.47267	6.36158	5.05872	5.62074	5.43071	5.916	6.03525	6.65993	4.94875	5.91922	6.45584	5.87584	5.18563	5.04218	5.75057
TMEM200C	5.80008	5.91014	6.17583	4.26433	4.77733	7.06955	4.98866	4.91031	5.07818	3.69914	5.05977	4.50329	4.53599	5.74943	5.53068	4.11787	4.83442	5.66377	5.19336	4.6065	5.62227	4.48756	5.27598	4.60494	6.65985	5.64234	6.57252	5.90059	5.5598	5.97389	5.26032	5.61911	5.10682	4.79046	6.33698	5.76265	5.91517	6.12202	5.34744	4.93613	5.07258	5.94939	5.11482	5.9415	5.63832	5.13779	6.30168	4.55024	4.28386
TMEM63C	8.33132	7.01848	7.15391	8.48641	8.72333	7.34204	9.53209	8.35591	10.0861	9.69418	8.6128	7.85716	8.42684	7.8917	8.18716	9.82539	8.68306	7.36412	8.71711	8.42393	8.31471	9.00911	9.25284	10.163	6.85039	7.44123	5.93922	6.72353	7.45919	7.86729	8.46256	8.98553	8.53004	7.82145	6.53646	7.24019	6.57483	8.16904	7.99497	7.73736	8.37675	7.91141	9.21959	7.44781	7.84284	7.73257	7.38488	8.58397	7.94625
TNC	12.8288	12.9484	12.7794	7.86011	9.01287	11.6289	9.76412	11.7284	9.35252	8.25192	12.0168	9.41667	7.72134	12.6957	10.1976	9.96606	11.9445	11.7698	9.51723	12.1995	12.7827	12.2307	10.4977	8.71183	11.2014	9.52488	13.1338	12.349	9.69561	12.6806	10.9579	10.954	12.3346	12.3509	11.5173	11.3301	11.9513	9.82716	12.4802	11.8704	10.164	11.3578	10.4137	9.04466	12.8541	10.5009	10.1752	8.81399	9.40517
TNFAIP6	5.51525	7.16452	5.63289	4.5966	5.87891	5.01941	5.32982	5.70422	6.15816	5.92252	4.77563	4.8429	5.02364	8.63162	6.01755	6.74349	5.05559	9.39986	5.24909	5.66791	7.19169	5.69551	5.40029	5.25526	4.1016	6.06341	8.76269	5.11292	5.74585	5.76445	5.80916	6.01351	6.29488	6.21053	6.65535	5.86581	5.8054	6.23719	5.9299	5.33559	6.06766	5.67913	6.99517	6.87431	5.53592	6.12148	5.86858	5.92327	6.84611
TNFRSF10C	7.32521	7.72507	8.75296	4.84867	5.54127	6.81767	5.32982	6.13152	5.4989	5.23187	8.48833	6.35566	5.51323	6.80367	5.36663	5.85032	6.76933	8.37038	5.77982	6.01197	5.96164	7.37519	5.5138	5.32082	7.48723	5.47849	9.42172	6.46808	5.93488	7.9502	5.60092	5.40692	5.06006	6.17	6.96187	5.6216	8.92414	6.47399	7.04258	7.08787	5.57151	6.05431	6.29875	5.53208	6.95641	5.57626	5.89509	5.62966	6.8896
TNFRSF13C	4.63482	4.88314	6.44707	4.15875	3.94715	8.35738	4.98866	4.40392	4.76989	4.79008	4.77563	4.8429	4.04567	6.55832	5.99582	4.11787	5.00399	6.54841	4.62197	4.53275	4.09179	4.06711	5.78377	4.41367	7.6363	4.97248	5.65251	5.11292	5.59265	4.72535	4.46276	4.89427	5.90445	5.05532	4.93956	6.61547	4.48193	5.75782	5.61843	5.916	5.74425	6.15184	4.52295	5.59058	5.46299	5.49955	4.88228	4.11038	3.22793
TNFRSF8	5.09795	5.15725	5.63289	4.03744	4.10441	6.40488	4.34612	4.30616	4.50556	4.03708	4.39454	4.56781	4.4564	4.85578	4.95802	4.88598	4.39169	6.12299	4.29847	4.6065	4.33271	4.48756	5.24293	4.07783	5.81096	4.53578	6.21927	4.32303	4.61861	4.72535	4.55545	5.00462	4.66882	5.14695	5.99467	5.70799	5.20194	5.21917	4.94624	5.15172	5.07258	4.32666	4.88791	5.6189	4.06996	4.44807	5.39221	4.45787	4.28386
TNFRSF9	5.15164	5.46752	6.89624	5.00712	5.75376	7.84195	5.08306	4.65014	5.07818	5.4233	4.29748	5.32108	5.92058	6.76334	5.53068	4.83499	5.15274	7.92125	4.94168	4.96862	5.00717	5.52925	5.71534	4.76702	6.65985	5.25046	6.72812	6.64339	5.38209	5.60447	4.71954	4.18675	4.96085	5.27297	5.77212	5.03038	5.71686	6.47399	5.25845	6.1457	6.09933	6.4855	5.81708	7.74301	5.60505	5.68366	5.5367	5.98076	6.49751
TREM1	5.30023	5.25843	5.72494	4.84867	5.3781	4.10438	4.25275	5.21758	4.93397	4.59601	3.9135	4.19176	3.89854	7.03557	4.68698	4.83499	5.00399	8.87125	4.16016	4.53275	4.75631	6.42944	4.75709	3.65746	4.69975	4.60968	9.86904	6.68403	4.75352	5.51671	4.64059	4.63619	4.79464	4.95631	6.10437	4.70819	5.05872	5.92911	5.54649	4.32375	4.02325	5.1564	6.51669	4.6045	4.78639	4.5398	4.93839	5.95232	7.26417
TREML1	3.22793	3.65025	4.88022	3.69935	3.7391	6.10447	3.22793	3.22793	4.14561	4.15834	4.06377	3.66535	3.89854	4.52919	4.80313	3.22793	3.22793	4.41737	3.22793	3.22793	3.9367	3.22793	4.75709	3.83318	5.23502	3.89843	3.71418	4.32303	4.61861	4.0014	4.98996	4.48012	5.15188	3.8916	4.71453	5.07655	3.91307	4.85749	4.6042	4.42295	4.46333	3.93271	3.22793	4.21905	4.06996	3.22793	4.05552	3.74266	3.667
TREML2	4.24166	5.38199	6.41139	4.15875	4.84603	7.60307	5.56846	3.22793	4.82719	4.52275	4.29748	4.93673	4.91961	6.55832	5.53068	5.1534	4.56057	7.77334	5.54081	4.6755	5.11536	5.37943	5.80584	4.54504	7.88398	4.97248	8.26937	5.23424	5.90942	5.26774	5.35414	5.51725	5.95368	5.65217	6.47305	7.48901	4.77471	6.12202	5.78306	5.49654	5.52461	5.67913	5.06192	5.40672	4.90901	4.70224	5.42985	4.71378	5.51338
TRPM6	12.7419	9.77174	12.102	11.3817	11.2859	11.8954	13.3799	13.7502	13.3499	13.9197	13.0233	13.0223	10.4886	10.9854	12.6074	12.6154	12.6115	10.8325	9.56688	12.746	13.3661	12.3054	12.9273	13.5865	12.0136	10.1372	10.4327	11.5121	12.7761	12.5168	12.3987	12.2623	11.8564	11.7722	7.65777	9.20894	11.8375	11.9163	11.8911	12.6703	11.4884	11.4282	11.6084	12.3543	12.9708	11.9436	12.2434	13.7047	12.4846
TTC24	3.74255	3.95433	4.82136	3.89172	3.22793	6.88931	4.25275	4.57436	3.69253	3.89142	4.39454	4.36038	4.6099	5.3969	5.21866	4.21915	3.22793	4.99985	3.77233	4.53275	3.22793	4.56891	4.70593	4.2617	5.60944	4.80537	4.89511	4.90523	4.75352	3.77809	4.36058	4.39212	4.36161	4.79046	4.14885	6.09419	4.70854	4.32568	4.6042	4.32375	4.92871	4.4261	3.73144	4.21905	4.64901	4.5398	4.28711	3.74266	3.22793
TWIST1	4.54998	5.76337	4.05441	4.15875	4.34855	4.2589	4.02825	3.22793	4.34294	4.35817	3.71496	4.43442	3.89854	3.89488	5.00547	3.86212	4.39169	5.19178	3.22793	3.8968	5.43435	3.91627	4.75709	3.22793	4.44596	3.70415	5.74504	4.65299	5.26257	4.53823	5.15908	4.835	5.27813	4.90358	5.87551	5.43003	3.71465	5.09566	4.33065	4.32375	4.57365	3.93271	4.88791	4.88583	4.30527	4.5398	5.2297	3.95211	3.22793
TWIST2	4.1102	4.69238	4.28571	3.89172	3.7391	3.62469	4.14827	3.22793	4.02592	4.03708	4.06377	4.36038	3.70423	4.36387	4.90861	4.53857	4.56057	5.22687	3.77233	3.70299	4.2207	4.06711	4.47317	4.07783	3.85035	4.04554	4.06245	4.01134	4.54429	4.30943	4.64059	4.18675	4.8527	4.35846	4.02876	4.34188	3.91307	4.13119	3.73063	3.9308	4.02325	3.72874	4.33237	4.21905	3.71863	3.73836	4.28711	3.74266	3.22793
U62631.5	3.22793	3.22793	4.54942	3.22793	3.22793	5.11908	3.69391	3.71905	3.22793	3.22793	3.71496	3.66535	3.70423	4.36387	3.87157	3.22793	4.29485	4.95759	3.77233	3.70299	4.2207	4.06711	4.25471	3.22793	4.58046	3.70415	4.29582	3.22793	3.903	3.22793	3.22793	4.29525	4.16122	3.8916	3.69422	4.42648	3.22793	4.13119	4.21883	4.32375	4.46333	4.08697	3.93648	4.00154	4.19583	4.23364	3.71007	3.22793	3.22793
UCN2	3.22793	4.32281	3.22793	3.22793	3.22793	3.7873	4.14827	3.71905	3.22793	3.89142	3.22793	3.22793	3.22793	3.70161	3.68492	3.22793	3.22793	3.96894	3.77233	3.22793	3.9367	3.22793	3.22793	3.22793	3.22793	3.70415	5.48254	4.32303	3.903	3.77809	3.74481	4.18675	4.0396	3.69926	4.02876	4.02514	3.22793	3.68506	3.73063	3.22793	3.22793	3.22793	3.93648	3.86205	4.06996	3.73836	3.90668	3.22793	3.22793
UGT2B10	4.35583	4.06385	4.28571	5.99531	4.97242	4.83257	6.10292	4.19663	6.43178	6.28762	4.63905	4.79301	4.53599	4.04126	5.21866	6.29152	3.91177	4.17787	4.79296	3.8968	4.82424	4.06711	4.89813	6.23465	4.80744	4.27454	3.22793	4.01134	4.98331	3.77809	5.84097	5.36798	5.6276	4.44419	3.69422	4.24884	3.22793	4.68737	4.21883	4.08466	5.31831	3.72874	5.62163	4.83484	5.12195	5.41812	4.38331	4.24186	3.667
VNN2	7.12723	7.49164	8.57703	5.87343	6.70966	8.77193	7.59836	6.81042	7.08433	6.81701	6.80392	6.34008	6.83046	8.00494	7.20966	7.26974	6.86599	9.85701	7.47205	6.85004	5.93405	6.84172	7.10556	5.96613	8.35161	8.20734	9.94335	7.05251	7.55871	7.0198	7.04807	7.47702	7.72908	7.24167	8.00187	7.50468	7.50692	7.6469	7.65112	6.97475	7.69116	7.8049	7.19086	7.68605	7.46706	7.16741	7.98223	6.11483	7.36745
VPREB3	4.71349	5.00823	8.39928	5.2733	5.50233	10.5354	6.06009	4.49271	4.98397	6.24932	4.63905	5.38573	4.6099	8.18769	7.53225	4.78166	4.39169	6.87492	4.52521	4.80181	4.60671	5.16401	7.40244	4.86343	9.47398	5.2082	6.17634	4.82715	6.58749	4.72535	5.15908	6.01351	7.13871	5.94745	5.68907	8.91056	5.86138	6.87762	6.95125	7.20388	7.3465	7.8049	5.81708	7.3036	7.36508	6.30846	5.84154	5.43382	4.89645
WDFY4	8.89968	9.40607	9.84755	6.89403	7.95293	11.1113	8.46246	8.15397	7.78295	8.1428	8.24842	7.97648	7.52497	9.38108	9.18648	8.41907	8.43728	9.98123	8.45365	8.77416	8.44469	9.2263	9.3636	7.9618	10.6553	8.42638	9.62976	9.08313	8.84675	8.9891	8.24263	8.29771	8.86456	8.80853	9.04172	9.61747	9.68441	9.27608	9.12879	9.47021	9.34613	9.78638	7.89125	9.28913	9.36857	8.79054	9.12215	7.12776	6.8896
WISP1	5.76759	6.25968	6.37477	4.79073	4.91091	7.53797	4.77411	5.50159	4.82719	4.35817	5.29027	5.18115	5.11949	6.91823	5.29477	4.9818	5.65062	6.67382	4.71074	5.78329	5.90588	6.63468	5.66772	4.34078	6.34735	5.96962	9.00228	7.54482	4.98331	6.46067	4.86255	5.19931	5.15188	6.19041	6.96187	6.29025	6.92318	6.2555	6.29504	6.02282	6.3818	6.26488	6.53493	6.63971	6.32235	5.08439	5.92109	5.0983	5.07116
WNT16	3.22793	3.22793	4.46911	3.22793	3.7391	4.50581	4.02825	3.91921	3.22793	4.03708	3.22793	4.36038	3.22793	4.44996	4.13093	3.86212	3.71372	4.34427	3.22793	3.22793	3.7316	3.22793	4.16842	3.22793	4.58046	3.22793	4.18726	3.22793	3.903	3.77809	4.11399	3.22793	4.0396	3.8916	3.69422	4.64444	3.22793	3.68506	3.22793	3.9308	4.02325	3.22793	3.22793	4.11778	3.71863	3.22793	3.71007	3.22793	3.667
WNT2	3.22793	3.22793	4.17811	3.22793	3.22793	3.7873	3.22793	3.91921	4.02592	3.22793	3.71496	3.22793	3.70423	4.04126	4.13093	3.22793	3.91177	5.8272	3.22793	3.8968	3.22793	3.71694	4.75709	3.22793	3.22793	3.70415	5.32884	4.32303	3.70743	5.3731	4.11399	3.91204	3.89351	3.8916	4.65055	3.69207	4.06324	4.40917	3.22793	3.22793	3.79382	4.4261	4.6836	4.30961	4.06996	3.22793	4.05552	3.22793	3.84652
WNT5A	8.99818	10.1663	9.5998	7.0678	7.93199	8.65423	8.96783	8.80477	8.93662	7.40501	8.60082	8.32027	8.17212	9.26397	8.57588	8.79889	8.7529	8.42093	10.4853	9.84665	10.2738	9.78037	8.48196	8.24678	8.87167	9.51272	11.213	10.392	8.68032	10.0702	8.62693	8.98247	8.73648	9.36921	9.81898	8.8322	9.59885	9.04425	9.05589	9.08053	10.3563	10.397	10.2013	8.08395	9.32245	8.9921	8.43423	7.15253	8.70197
XIRP1	4.45763	3.65025	3.90576	3.22793	3.94715	3.62469	3.69391	4.49271	3.69253	4.03708	3.9135	3.84421	3.89854	4.6716	3.87157	3.86212	3.22793	4.41737	3.77233	3.8968	3.7316	4.30169	3.82898	3.83318	3.22793	3.70415	4.70721	3.22793	3.70743	4.0014	3.9551	3.91204	3.70064	4.66492	3.69422	4.02514	3.91307	4.01328	3.22793	3.72736	4.02325	3.93271	3.22793	4.53844	4.71981	3.73836	4.38331	3.22793	3.22793
ZBED2	3.95196	4.96797	6.46458	3.69935	4.70423	5.54887	4.50915	3.22793	4.02592	4.03708	3.71496	4.74084	4.16814	4.73638	4.4857	3.22793	4.18638	6.67382	3.22793	3.22793	4.09179	4.06711	5.69174	3.96656	5.9865	3.70415	4.77333	4.18178	4.98331	4.43048	4.36058	4.835	5.27813	4.26415	5.36789	6.36158	4.56297	5.2578	5.05928	4.7444	4.33929	4.21521	4.6836	6.06814	4.49169	4.23364	5.39221	3.74266	4.50785
ZBTB32	3.95196	4.52416	5.13767	4.35866	3.7391	6.61041	4.34612	3.71905	4.34294	4.03708	3.9135	4.56781	3.89854	5.60059	5.75722	4.21915	4.06167	5.63872	4.29847	4.04357	4.43264	4.19258	5.64326	3.22793	6.06654	4.36971	4.89511	4.18178	5.08352	4.63583	4.46276	4.18675	4.90801	4.35846	5.33101	5.86581	4.6382	5.09566	4.6042	4.7444	4.57365	4.87979	4.60629	4.83484	4.49169	4.70224	4.93839	4.24186	3.667
hsa-mir-4537	4.45763	4.58323	4.82136	3.22793	3.7391	4.74861	4.50915	3.91921	4.42762	3.69914	4.63905	4.74084	4.4564	5.01478	4.85706	4.30972	4.06167	5.41938	4.41842	5.16031	4.43264	3.91627	4.25471	4.2617	4.90591	4.91936	5.0055	4.01134	4.61861	3.22793	4.92796	4.95071	3.89351	4.79046	5.68907	5.24582	5.40974	6.32641	4.21883	4.81189	4.57365	5.61099	4.43227	4.00154	4.40296	4.77526	5.50203	3.22793	3.22793
hsa-mir-4538	4.24166	4.15938	4.3818	3.69935	3.22793	5.54887	4.25275	3.91921	4.14561	3.69914	4.29748	4.36038	4.4564	5.06345	4.40884	3.67816	3.71372	4.72008	3.77233	4.36703	4.60671	3.71694	4.3333	4.07783	5.37208	4.36971	5.20026	3.78525	4.37725	4.53823	4.98996	4.835	4.26706	4.66492	4.77504	5.20558	6.24245	7.0945	4.43041	4.32375	4.67351	5.38279	3.22793	4.30961	4.71981	4.10316	4.88228	3.22793	3.22793
hsa-mir-4539	4.24166	4.15938	3.70941	3.22793	3.7391	5.26936	4.34612	3.91921	3.69253	3.22793	4.18877	3.84421	4.04567	4.52919	3.22793	3.67816	3.71372	4.26497	3.99339	3.8968	3.7316	3.22793	4.16842	3.83318	4.80744	4.36971	4.39274	4.01134	3.70743	3.22793	3.74481	4.18675	3.89351	4.26415	4.71453	4.24884	5.24627	5.70464	4.33065	4.42295	4.33929	4.67632	3.73144	3.22793	4.19583	3.94612	4.05552	3.22793	3.22793
hsa-mir-5195	3.22793	3.65025	4.46911	3.22793	3.7391	5.26936	3.69391	3.22793	3.8822	3.69914	3.22793	3.66535	3.89854	4.04126	4.13093	3.67816	3.22793	4.34427	3.22793	3.22793	3.22793	3.22793	3.82898	3.65746	4.80744	3.22793	3.91241	3.22793	3.22793	3.77809	4.24597	4.06199	4.0396	3.22793	4.02876	4.82574	3.22793	4.40917	4.33065	3.9308	3.79382	4.08697	3.22793	3.86205	3.22793	3.73836	3.90668	3.95211	3.22793
IGF2BP3	3.22793	5.22559	5.35097	3.69935	4.10441	5.45398	4.02825	3.91921	4.64575	3.89142	4.06377	5.50616	4.7441	5.11027	5.00547	4.00161	4.47966	5.41938	3.99339	4.45333	5.11536	4.30169	4.47317	4.41367	4.80744	5.25046	5.28739	4.90523	4.46425	4.63583	4.71954	4.89427	5.19537	4.26415	5.85039	5.32268	4.95308	4.80355	4.75357	4.32375	5.26119	4.99807	4.88791	5.07042	4.19583	4.23364	4.99199	4.45787	4.0963
[truncated: 89 more columns]

## Sheet: Immune_Score
	B-cells	CD4+ T-cells	CD4+ Tcm	CD4+ Tem	CD8+ T-cells	CD8+ Tcm	CD8+ Tem	Eosinophils	Macrophages	Mast cells	Memory B-cells	Monocytes	NK cells	NKT	Neutrophils	Tgd cells	Th1 cells	Th2 cells	Tregs	aDC	iDC	pDC
CSM5FZ1M	0.134292	0.42958	0.837498	0.472555	0.478653	0.627123	0.4921	0.171146	0.188452	0.318835	0.406973	0.72358	0.587443	0.312579	0.163215	0.582412	0.416015	0.47822	0.353984	0.445255	0.567905	0.634956
CSM5FZ1O	0.254075	0.474519	0.854296	0.477068	0.483806	0.70866	0.556967	0.31333	0.276823	0.421751	0.380744	0.700464	0.635406	0.364032	0.0309211	0.620172	0.432967	0.56806	0.49742	0.467825	0.606727	0.711358
CSM5FZ1Q	0.484242	0.527672	0.87178	0.49517	0.592529	0.67791	0.584507	0.266311	0.286328	0.381376	0.476672	0.716805	0.617434	0.337151	0.216363	0.639159	0.455164	0.480877	0.410389	0.498423	0.606231	0.65377
CSM5FZ1R	0.131538	0.451536	0.735269	0.382696	0.430578	0.651117	0.38781	0.104561	0.140915	0.104703	0.34505	0.669225	0.461762	0.241524	0.0137613	0.529795	0.333016	0.378233	0.19749	0.379731	0.551223	0.621595
CSM5FZ1S	0.208779	0.55362	0.760126	0.438738	0.449648	0.667899	0.448422	0.267977	0.197987	0.227264	0.39193	0.668208	0.510524	0.278111	0.0793328	0.58568	0.372675	0.466678	0.321885	0.421218	0.574122	0.618068
CSM5FZ1T	0.661163	0.606017	0.872204	0.538026	0.611798	0.649576	0.57546	0.229235	0.294751	0.350375	0.543368	0.740251	0.594945	0.328909	0.135944	0.580809	0.48608	0.488955	0.442887	0.506306	0.583784	0.642321
CSM5FZ1W	0.261416	0.456795	0.784304	0.45141	0.462793	0.648177	0.450462	0.20278	0.200085	0.274725	0.432811	0.666333	0.539593	0.287633	0.0116712	0.574645	0.390371	0.428872	0.389986	0.429751	0.569536	0.652522
CSM5FZ22	0.0700796	0.37885	0.834984	0.478224	0.458421	0.625567	0.516985	0.180756	0.177039	0.27965	0.385139	0.698532	0.578579	0.289753	0.135893	0.582096	0.410641	0.457963	0.293109	0.40865	0.55742	0.619815
CSM5FZ23	0.145728	0.398418	0.784646	0.428151	0.428284	0.664809	0.443984	0.229887	0.195218	0.314313	0.372432	0.666189	0.583982	0.280422	0.0480681	0.58831	0.393772	0.438368	0.351065	0.42883	0.588838	0.650634
CSM5FZ24	0.206274	0.401744	0.768965	0.413392	0.440138	0.669377	0.434475	0.181959	0.212141	0.20796	0.352035	0.682773	0.533451	0.247604	0.0139519	0.567314	0.379409	0.394041	0.328067	0.427642	0.604342	0.643734
CSM5FZ27	0.159455	0.410859	0.831581	0.45347	0.510855	0.654272	0.504931	0.153174	0.203027	0.307997	0.386584	0.709179	0.55368	0.289922	0.159783	0.593582	0.403767	0.406126	0.308297	0.427192	0.580433	0.627752
CSM5FZ28	0.241628	0.467743	0.789368	0.415661	0.497747	0.671105	0.484532	0.193024	0.217261	0.255465	0.379666	0.685636	0.532832	0.262748	0.0319161	0.569231	0.383468	0.419507	0.354686	0.415063	0.576197	0.647148
CSM5FZ29	0.198097	0.456087	0.776502	0.402185	0.52478	0.636065	0.446971	0.148065	0.187546	0.248364	0.365155	0.655843	0.491109	0.258392	0.0288739	0.59137	0.384742	0.362826	0.337726	0.412045	0.572693	0.613666
CSM5FZ2D	0.402053	0.523768	0.871897	0.498062	0.564562	0.659749	0.616747	0.245333	0.321992	0.417867	0.427603	0.755406	0.642241	0.36724	0.369166	0.603726	0.480443	0.538187	0.490881	0.528021	0.5973	0.666944
CSM5FZ2E	0.402314	0.458068	0.833107	0.448858	0.477118	0.666664	0.504282	0.231948	0.262131	0.323798	0.400667	0.695241	0.622254	0.294237	-0.0553596	0.578516	0.429145	0.441082	0.422584	0.43504	0.595623	0.676203
CSM5FZ2F	0.18977	0.386683	0.803495	0.420971	0.459206	0.669432	0.447259	0.159919	0.25508	0.319991	0.375612	0.681963	0.57262	0.302829	0.0898346	0.623126	0.39554	0.41164	0.41677	0.441687	0.588949	0.6822
CSM5FZ2L	0.0742282	0.383038	0.835412	0.461681	0.436856	0.629716	0.450011	0.172688	0.185681	0.286105	0.383117	0.700843	0.57983	0.288791	0.193513	0.56296	0.381938	0.424471	0.298875	0.42672	0.588007	0.623894
CSM5FZ2M	0.435934	0.604219	0.858911	0.50336	0.548906	0.743491	0.614527	0.23505	0.371645	0.371256	0.437897	0.712505	0.659627	0.352695	0.401855	0.629608	0.46727	0.486587	0.56554	0.555167	0.676761	0.734239
CSM5FZ2N	0.206737	0.456155	0.796302	0.431198	0.437632	0.654236	0.449434	0.210412	0.235387	0.29347	0.402283	0.662727	0.570217	0.286717	0.0706754	0.593504	0.380897	0.423177	0.405326	0.440518	0.599959	0.637053
CSM5FZ2O	0.190393	0.420606	0.842001	0.473081	0.53114	0.642447	0.513153	0.179576	0.20234	0.32873	0.398555	0.704311	0.58375	0.31344	0.184773	0.586749	0.418238	0.455616	0.331904	0.452184	0.580527	0.653014
CSM5FZ2Q	0.205217	0.424001	0.81698	0.461101	0.427331	0.694732	0.469969	0.155893	0.218743	0.304121	0.393753	0.673767	0.590417	0.333592	0.0793442	0.60237	0.420458	0.472651	0.43998	0.426531	0.601088	0.663608
CSM5FZ2R	0.189965	0.502532	0.857174	0.521053	0.575151	0.665293	0.593463	0.224632	0.255112	0.385621	0.404217	0.747211	0.608854	0.337492	0.295947	0.619769	0.446627	0.504013	0.410893	0.508548	0.592087	0.641472
CSM5FZ2S	0.383264	0.540137	0.801622	0.494306	0.522419	0.666557	0.47695	0.100051	0.231108	0.229411	0.466309	0.696429	0.586582	0.283215	0.0655313	0.579299	0.427862	0.417447	0.401468	0.46007	0.579488	0.654029
CSM5FZ2T	0.179032	0.420972	0.770224	0.429682	0.501834	0.636958	0.415659	0.107858	0.182668	0.180055	0.394824	0.667748	0.526388	0.254189	0.000703671	0.581903	0.389588	0.379783	0.324974	0.404637	0.55539	0.64024
CSM5FZ34	0.593498	0.617672	0.857006	0.466893	0.641597	0.620521	0.549097	0.180382	0.260604	0.319724	0.517556	0.73403	0.573659	0.299651	0.13327	0.596873	0.462625	0.457713	0.392033	0.497179	0.578115	0.625841
CSM5FZ37	0.257416	0.462708	0.845705	0.412292	0.57298	0.657033	0.51185	0.162517	0.228143	0.287361	0.400355	0.671259	0.586173	0.304904	0.0407505	0.64288	0.40079	0.377121	0.40173	0.451276	0.60199	0.648634
CSM5FZ3A	0.331895	0.542221	0.937899	0.545703	0.593004	0.779341	0.652338	0.276241	0.39873	0.53763	0.395969	0.776866	0.6815	0.416565	0.592066	0.698892	0.501586	0.573654	0.581879	0.594803	0.699078	0.755871
CSM5FZ3B	0.154612	0.421889	0.905264	0.520256	0.585577	0.678424	0.620086	0.231919	0.272636	0.334086	0.37367	0.766014	0.637789	0.352642	0.212919	0.6291	0.452542	0.518426	0.44965	0.538857	0.623884	0.657035
CSM5FZ3C	0.338476	0.43037	0.841299	0.498777	0.432391	0.642335	0.497438	0.17655	0.259675	0.280369	0.379013	0.693252	0.583589	0.30259	-0.00127889	0.604196	0.386275	0.443931	0.420446	0.434015	0.589098	0.669558
CSMDRVXF	0.146944	0.431832	0.887425	0.483527	0.533503	0.665986	0.572012	0.174199	0.254109	0.37914	0.386285	0.714042	0.618533	0.346505	0.221851	0.632386	0.436772	0.486272	0.436661	0.489942	0.618118	0.658813
CSMDRVXG	0.255425	0.434515	0.845391	0.462937	0.417586	0.658778	0.443205	0.0910407	0.223489	0.280299	0.382926	0.666245	0.559133	0.295939	-0.0121202	0.586751	0.371106	0.406237	0.396917	0.426707	0.61279	0.666486
CSMDRVXH	0.274333	0.455665	0.834234	0.447374	0.463977	0.660376	0.450498	0.109586	0.212297	0.27495	0.396157	0.65438	0.560709	0.309667	0.00223576	0.61651	0.393847	0.420565	0.380843	0.410748	0.591183	0.665276
CSMDRVXJ	0.40109	0.516423	0.856949	0.520659	0.52508	0.665074	0.528049	0.182177	0.242177	0.337907	0.41427	0.677396	0.586322	0.316533	-0.062101	0.576547	0.409882	0.437036	0.388167	0.447187	0.596039	0.672603
CSMDRVXK	0.202059	0.408071	0.889452	0.505565	0.526141	0.657466	0.517896	0.221511	0.250825	0.339811	0.373078	0.732473	0.590318	0.348692	0.11064	0.616011	0.429112	0.434386	0.359841	0.468812	0.609733	0.637578
CSMDRVXL	0.309296	0.499689	0.88785	0.477876	0.502181	0.719161	0.552566	0.237529	0.316454	0.347511	0.380951	0.716214	0.608305	0.366973	0.16155	0.665853	0.435237	0.481937	0.489583	0.518014	0.658717	0.701834
CSMDRVXN	0.525073	0.541716	0.87807	0.467926	0.57016	0.673119	0.533551	0.216724	0.243044	0.290443	0.40903	0.699616	0.573226	0.348561	-0.00559729	0.623357	0.428668	0.43617	0.45486	0.48608	0.595413	0.658055
CSMDRVXP	0.214687	0.446045	0.899205	0.507015	0.630778	0.689497	0.629283	0.174262	0.281114	0.375612	0.330804	0.728433	0.624303	0.333902	0.137749	0.640131	0.462643	0.460618	0.436582	0.529842	0.593794	0.658666
CSMDRVXR	0.378085	0.464097	0.859386	0.473897	0.510916	0.695813	0.55511	0.205483	0.302525	0.297888	0.372291	0.71089	0.607275	0.313358	0.108065	0.604259	0.418285	0.441123	0.476707	0.502987	0.598529	0.694181
CSMDRVXX	0.323452	0.432627	0.886792	0.460129	0.540789	0.652328	0.546491	0.190772	0.24428	0.353186	0.409855	0.718518	0.595828	0.338502	0.178366	0.603105	0.426647	0.443325	0.380358	0.459949	0.599119	0.644437
CSMDRVXY	0.346259	0.51796	0.856438	0.472347	0.526202	0.659548	0.537855	0.225581	0.246422	0.337804	0.448304	0.722922	0.606634	0.32477	0.190915	0.602315	0.441431	0.481326	0.412639	0.469027	0.590779	0.627476
CSMDRVY1	0.404375	0.529015	0.825121	0.449554	0.520692	0.668637	0.510376	0.202433	0.271009	0.282291	0.44092	0.674411	0.618515	0.327715	0.0891489	0.611376	0.441562	0.46477	0.467419	0.472351	0.595568	0.648561
CSMDRVY2	0.362706	0.522996	0.869402	0.520104	0.546061	0.678127	0.592142	0.173907	0.28311	0.407001	0.429823	0.726872	0.633515	0.344006	0.163955	0.632464	0.465985	0.506791	0.451414	0.495597	0.606748	0.661841
CSMDRVY3	0.183155	0.47783	0.784578	0.464732	0.500886	0.68069	0.47361	0.150873	0.229791	0.277605	0.3719	0.680645	0.574404	0.272634	0.165277	0.591858	0.425754	0.444811	0.357832	0.445824	0.59623	0.639345
CSMDRVY4	0.34476	0.596299	0.790065	0.51689	0.54086	0.655006	0.557806	0.13928	0.290014	0.24815	0.43594	0.698224	0.591597	0.28648	0.1223	0.566164	0.436386	0.431003	0.391572	0.489806	0.606743	0.64172
CSMDRVY5	0.330824	0.444425	0.845971	0.504235	0.517198	0.646292	0.52146	0.193563	0.239082	0.333575	0.445127	0.703187	0.617529	0.324835	0.131031	0.600218	0.43588	0.477468	0.357383	0.421178	0.581956	0.640251
CSMDRVY6	0.295261	0.557371	0.802671	0.479202	0.470718	0.693399	0.474867	0.170849	0.223691	0.285234	0.446594	0.662247	0.585837	0.296071	0.0309975	0.589644	0.40965	0.445774	0.38815	0.419851	0.591328	0.649169
CSMDRVY7	0.29053	0.490306	0.819898	0.457659	0.451749	0.717321	0.545722	0.229796	0.283774	0.2572	0.38886	0.685068	0.620173	0.317243	0.0314311	0.616479	0.41165	0.480948	0.459211	0.472451	0.61755	0.657632
CSMDTZ4X	0.0780741	0.454463	0.737641	0.414447	0.418888	0.661361	0.399176	0.163827	0.187611	0.206998	0.349712	0.666327	0.456216	0.248334	0.196147	0.566638	0.357359	0.374019	0.326375	0.420847	0.560949	0.62125
CSMDTZ4Y	0.0264925	0.549085	0.731588	0.445945	0.402597	0.672551	0.376938	0.145376	0.16482	0.201734	0.387023	0.649964	0.504787	0.264908	0.231509	0.566391	0.353173	0.402113	0.325599	0.429041	0.572854	0.611101
ESM5GEY7	0.33023	0.491164	0.773952	0.460225	0.50683	0.645853	0.476567	0.177672	0.242504	0.248467	0.410262	0.700605	0.544207	0.291862	0.159584	0.572696	0.404625	0.398126	0.343802	0.463068	0.58846	0.645102
ESM5GEY9	0.247601	0.454906	0.810412	0.473606	0.502896	0.666922	0.486751	0.174561	0.261897	0.279787	0.409409	0.693405	0.597583	0.29612	0.0309274	0.632964	0.413665	0.440338	0.413177	0.457811	0.595557	0.669771
ESM5GEYA	0.444964	0.519127	0.828789	0.46492	0.555525	0.652934	0.554844	0.275139	0.304125	0.323052	0.428544	0.700929	0.604927	0.313529	0.0139651	0.594039	0.432851	0.464218	0.431919	0.455403	0.599791	0.679926
ESM5GEYI	0.46401	0.512167	0.879327	0.46107	0.622294	0.66385	0.563823	0.171033	0.34043	0.408591	0.400973	0.718529	0.616073	0.340368	0.203077	0.624851	0.441917	0.375867	0.440976	0.471998	0.633654	0.739004
HSM5FZAM	0.376741	0.525591	0.808424	0.49955	0.524025	0.663518	0.525223	0.201519	0.252318	0.330016	0.422668	0.674138	0.595347	0.30166	0.178398	0.623082	0.418523	0.434194	0.447682	0.475805	0.598064	0.652476
HSM5FZAN	0.0119644	0.392008	0.717655	0.409331	0.447497	0.589317	0.361864	0.0962488	0.123232	0.105843	0.351821	0.654392	0.494404	0.209779	0.0591775	0.520582	0.324749	0.323896	0.200076	0.380994	0.560816	0.631686
HSM5FZAR	0.166807	0.589287	0.821177	0.494491	0.54721	0.672305	0.541634	0.146985	0.276236	0.197318	0.3673	0.708866	0.616383	0.294847	0.414426	0.619936	0.430073	0.456261	0.427188	0.53496	0.645154	0.702194
HSM5FZAS	0.257745	0.503079	0.819117	0.47603	0.494301	0.670261	0.503063	0.208015	0.281797	0.3233	0.374487	0.692175	0.611819	0.32374	0.266752	0.615257	0.417573	0.446996	0.464817	0.474354	0.659739	0.706759
HSM5FZBB	0.324201	0.543978	0.818256	0.518127	0.516796	0.641403	0.509238	0.183242	0.26323	0.245058	0.432307	0.69145	0.608977	0.304743	0.204153	0.617158	0.413494	0.460117	0.436174	0.469362	0.657573	0.666591
HSM5FZBC	0.117858	0.397237	0.781985	0.459975	0.521545	0.591989	0.428144	0.123103	0.107515	0.164195	0.412778	0.714384	0.507911	0.236621	0.108086	0.523746	0.362672	0.386452	0.208687	0.385649	0.52226	0.579367
HSM5FZBG	0.353384	0.509959	0.794094	0.457345	0.507149	0.659004	0.500237	0.20605	0.252341	0.25553	0.407107	0.705675	0.600459	0.269256	-0.0164529	0.570599	0.40896	0.449353	0.389167	0.475004	0.593229	0.629925
HSM6S4FR	0.494804	0.554653	0.809637	0.446054	0.511958	0.681239	0.52701	0.290188	0.244399	0.287359	0.478698	0.679499	0.587152	0.334969	0.134504	0.620037	0.419066	0.480218	0.461602	0.447584	0.581694	0.661216
HSM6S4FU	0.356037	0.41602	0.733734	0.476927	0.434034	0.616653	0.391063	0.100001	0.222793	0.121143	0.389617	0.679537	0.516546	0.221261	0.0769004	0.518156	0.363853	0.407967	0.30323	0.420853	0.568416	0.626588
HSM6S4GK	0.29519	0.467257	0.748628	0.41707	0.428733	0.611341	0.421147	0.201949	0.190584	0.187072	0.445365	0.658603	0.500432	0.229339	0.139976	0.569561	0.370021	0.392206	0.293291	0.424501	0.567021	0.64821
HSM6S4GL	0.183559	0.450522	0.737627	0.402439	0.452173	0.605023	0.427539	0.100534	0.15373	0.120056	0.420849	0.648954	0.490109	0.233424	0.0495324	0.531562	0.355869	0.374228	0.231308	0.407055	0.523518	0.639858
HSM7H3WH	0.225158	0.453338	0.75559	0.459096	0.506477	0.623659	0.460967	0.136897	0.211878	0.153276	0.381133	0.688008	0.52463	0.251828	-0.0246386	0.543352	0.366698	0.382363	0.273537	0.429641	0.562778	0.635515
HSM7H3WK	0.363116	0.467384	0.779494	0.465691	0.485022	0.634298	0.425528	0.178095	0.231792	0.235493	0.428811	0.674468	0.562957	0.296469	0.0244501	0.578691	0.397097	0.429069	0.352158	0.430821	0.562016	0.636987
HSM7H3WL	0.614435	0.474065	0.785779	0.487046	0.493551	0.623847	0.459061	0.137012	0.253967	0.173633	0.467195	0.69871	0.514418	0.276126	0.0239557	0.529206	0.411391	0.370419	0.354024	0.46439	0.555126	0.639566
HSM7H3WO	0.377967	0.568472	0.803062	0.50524	0.543534	0.693882	0.556022	0.156559	0.267392	0.275306	0.406792	0.690395	0.613443	0.302265	0.128364	0.612919	0.427088	0.483825	0.470179	0.497001	0.613211	0.667444
HSM7H3WP	0.0720116	0.405634	0.732201	0.456992	0.46827	0.630277	0.408293	0.167128	0.19568	0.167781	0.348996	0.661143	0.534437	0.255252	0.0362528	0.533534	0.349867	0.415187	0.289472	0.388044	0.554452	0.622687
HSM7H3WY	0.198975	0.490756	0.783173	0.480662	0.476325	0.674651	0.533472	0.172743	0.314251	0.279533	0.356357	0.705329	0.582495	0.294943	0.356472	0.61681	0.412092	0.460123	0.462806	0.499814	0.645892	0.686907
HSM9JBU	0.299648	0.426411	0.743267	0.469154	0.437407	0.611521	0.405474	0.199976	0.18734	0.153189	0.399354	0.668803	0.503588	0.230684	-0.0185729	0.491679	0.343809	0.374414	0.272066	0.423732	0.554387	0.633026
HSM9JTBZ	0.197573	0.493497	0.861505	0.461193	0.604395	0.620798	0.558218	0.124128	0.166259	0.293035	0.390931	0.709637	0.592834	0.307804	0.130896	0.604463	0.429475	0.440726	0.328256	0.444307	0.571723	0.618832
HSM9UBMN	0.285795	0.528123	0.864859	0.482718	0.566943	0.678645	0.560047	0.175003	0.273598	0.361838	0.418928	0.748065	0.625444	0.31526	0.24892	0.633295	0.438504	0.482909	0.438897	0.498688	0.606014	0.651706
HSM9UBMO	0.490927	0.609269	0.850101	0.471003	0.587512	0.674627	0.590923	0.2705	0.27881	0.326922	0.457121	0.71023	0.628462	0.329192	0.186175	0.628859	0.466663	0.476055	0.467047	0.500664	0.614458	0.682648
HSM9UBMP	0.345944	0.383758	0.804939	0.443114	0.41842	0.661945	0.476558	0.174956	0.248299	0.219684	0.389156	0.691352	0.587685	0.276124	-0.00662333	0.577527	0.393988	0.432435	0.383957	0.432811	0.58962	0.655068
HSM9UBMQ	0.417758	0.541143	0.831221	0.536476	0.511145	0.684261	0.559048	0.167731	0.311476	0.270921	0.409693	0.710825	0.653053	0.313348	0.158662	0.624961	0.455072	0.483152	0.469256	0.508525	0.644178	0.691129
HSM9UBMR	0.329904	0.56324	0.888242	0.540609	0.646061	0.680055	0.592205	0.178143	0.298673	0.366346	0.419083	0.736741	0.638895	0.326601	0.311254	0.63547	0.461854	0.489224	0.43354	0.546229	0.615995	0.66814
MSM5LWKW	0.0822545	0.442902	0.813637	0.51394	0.383418	0.650084	0.402032	0.0757164	0.21277	0.295503	0.385488	0.656986	0.551361	0.289839	0.0411133	0.610281	0.370698	0.399158	0.372525	0.397203	0.611701	0.668219
MSM5LWKX	0.351538	0.408841	0.808876	0.510119	0.438129	0.636513	0.464872	0.143633	0.221993	0.278941	0.406739	0.671827	0.567375	0.29667	-0.0250246	0.588894	0.398843	0.43381	0.387507	0.428158	0.574729	0.663731
MSM5LWL2	0.524731	0.659057	0.866202	0.496338	0.656689	0.671043	0.620387	0.24544	0.337677	0.390511	0.460778	0.712096	0.664438	0.374634	0.158337	0.669627	0.493004	0.485623	0.5788	0.520289	0.636618	0.720392
MSM5LWL5	0.328878	0.596658	0.888158	0.480063	0.663343	0.67099	0.598546	0.166732	0.315665	0.426868	0.417752	0.724985	0.61439	0.334414	0.300652	0.640976	0.471244	0.429564	0.480284	0.53903	0.625072	0.671821
MSM719MD	0.257645	0.589876	0.797049	0.516044	0.511873	0.717493	0.570194	0.188216	0.277667	0.282737	0.411946	0.699762	0.610408	0.322025	0.370454	0.655044	0.434623	0.508903	0.520516	0.530288	0.650112	0.682982
MSM719MS	0.326925	0.496049	0.794536	0.448325	0.476668	0.661782	0.463644	0.163716	0.257967	0.282549	0.411942	0.681898	0.584037	0.280288	0.0556767	0.599613	0.415076	0.459732	0.42902	0.456101	0.597935	0.658431
PSM6XBZC	0.348439	0.43421	0.765942	0.488475	0.444555	0.631799	0.399497	0.117153	0.221301	0.237083	0.402459	0.690526	0.545543	0.255074	-0.0171497	0.537645	0.383059	0.40483	0.309346	0.420408	0.583909	0.647112
PSM6XBZP	0.196243	0.406707	0.839345	0.467107	0.516474	0.648472	0.493499	0.18928	0.218026	0.352632	0.417238	0.706338	0.60562	0.300224	0.170688	0.591928	0.424082	0.427836	0.359376	0.443626	0.584445	0.639514
PSM6XBZR	0.537168	0.552861	0.856721	0.543758	0.564538	0.65387	0.523712	0.223239	0.258906	0.367165	0.484118	0.723582	0.613597	0.327859	0.124584	0.606167	0.452745	0.493545	0.423875	0.4523	0.585463	0.625436
PSM6XBZY	0.283669	0.51654	0.798125	0.460033	0.510229	0.657724	0.491562	0.160002	0.234587	0.284123	0.40166	0.678943	0.565769	0.273299	0.257445	0.609035	0.404715	0.433358	0.383204	0.459388	0.608909	0.619734
PSM6XBZZ	0.166593	0.402687	0.754917	0.457341	0.419177	0.633874	0.398131	0.105034	0.204582	0.133591	0.384071	0.653308	0.52391	0.240015	0.106402	0.546502	0.348355	0.404788	0.294253	0.40521	0.571821	0.613956
PSM6XC15	0.302992	0.465191	0.794752	0.46212	0.468848	0.655798	0.440367	0.0991202	0.216434	0.225385	0.383158	0.674276	0.581177	0.259462	0.13677	0.589089	0.394652	0.406807	0.375244	0.441909	0.584161	0.643279
PSM7J4EV	0.44079	0.550051	0.883244	0.54365	0.589706	0.680396	0.577908	0.238845	0.314382	0.429257	0.445034	0.744778	0.650278	0.349461	0.20293	0.657713	0.45597	0.50755	0.497825	0.524108	0.621641	0.670927
PSM7J4F3	0.396958	0.520942	0.796736	0.5158	0.447693	0.655088	0.451655	0.207986	0.274	0.318437	0.457417	0.67685	0.584828	0.284402	0.161154	0.588758	0.397689	0.443869	0.387336	0.452076	0.604116	0.664401
CSM5FZ1N	0.308911	0.544463	0.989578	0.563341	0.496599	0.819732	0.609591	0.303488	0.334699	0.50076	0.452469	0.813722	0.713889	0.44476	0.109711	0.729857	0.520517	0.653905	0.592976	0.521153	0.71684	0.795705
CSM5FZ1U	0.640636	0.756289	1.02485	0.641963	0.679691	0.89867	0.755943	0.367631	0.464423	0.539366	0.545245	0.866847	0.791716	0.46925	0.700679	0.756737	0.620918	0.667585	0.728444	0.663501	0.801555	0.876203
CSM5FZ1V	0.365117	0.639797	0.986388	0.570111	0.5989	0.826521	0.676232	0.283166	0.310461	0.35851	0.477968	0.807623	0.738267	0.39796	0.304815	0.695503	0.532097	0.602331	0.57516	0.583905	0.729436	0.803575
CSM5FZ2G	0.904151	0.766292	1.08926	0.601167	0.82214	0.769083	0.788552	0.322834	0.39441	0.508576	0.636608	0.865377	0.780624	0.464291	0.147916	0.735992	0.622284	0.583686	0.615481	0.653773	0.699215	0.786126
CSM5FZ2H	0.881887	0.811762	1.05758	0.623229	0.72586	0.844919	0.78473	0.397231	0.419037	0.521047	0.622149	0.833766	0.774218	0.4902	0.364471	0.756774	0.618793	0.626352	0.690923	0.661254	0.75538	0.861762
CSM5FZ2I	0.438745	0.595794	1.02181	0.53534	0.626394	0.819223	0.722122	0.246362	0.374941	0.379623	0.43484	0.851049	0.771037	0.444039	0.320958	0.767034	0.563784	0.559462	0.617626	0.618039	0.739927	0.852437
CSM5FZ2P	0.684759	0.722178	1.06285	0.649262	0.718193	0.955546	0.811728	0.433428	0.57491	0.676221	0.56453	0.885459	0.838204	0.550993	0.867644	0.79851	0.689702	0.763838	0.833302	0.716133	0.827759	0.953304
CSM5FZ35	0.539493	0.773383	1.04808	0.591754	0.826156	0.83778	0.809345	0.303258	0.449059	0.46363	0.553268	0.861644	0.833846	0.481581	0.512325	0.808343	0.61927	0.648123	0.714869	0.692166	0.8011	0.879385
CSM5FZ36	0.636915	0.648523	1.06013	0.509981	0.827419	0.798322	0.781109	0.288984	0.40545	0.391188	0.528671	0.876353	0.787333	0.453628	0.37026	0.724634	0.583111	0.469963	0.60903	0.644172	0.76879	0.855799
CSMDRVXM	0.887529	0.769337	1.09541	0.677329	0.747203	0.883188	0.7838	0.387751	0.486457	0.589768	0.596072	0.86186	0.792749	0.548443	0.446798	0.786648	0.638909	0.664031	0.777023	0.699802	0.799229	0.895262
CSMDRVXO	0.320531	0.72212	1.07948	0.660483	0.676889	0.969482	0.800609	0.445968	0.56918	0.723047	0.45709	0.884852	0.813247	0.514142	0.875762	0.797572	0.638056	0.747726	0.844805	0.796182	0.851248	0.950181
CSMDRVXZ	0.651631	0.70718	0.976439	0.567954	0.621321	0.803849	0.653581	0.2855	0.31629	0.280949	0.596946	0.84113	0.688948	0.390818	0.277399	0.71368	0.553821	0.545197	0.578426	0.628854	0.728881	0.7889
ESM5GEY8	0.740015	0.86676	1.08578	0.679738	0.845087	0.944575	0.858695	0.37547	0.558548	0.66284	0.603531	0.868931	0.865855	0.541707	0.692009	0.833018	0.684454	0.751826	0.812602	0.771765	0.835099	0.901192
ESM5GEYB	0.958052	0.805255	1.09276	0.640628	0.868905	0.761896	0.820255	0.321472	0.465387	0.481021	0.675206	0.899451	0.79549	0.459413	0.221275	0.749752	0.63161	0.603336	0.646874	0.640463	0.712323	0.832994
ESM5GEYK	0.590045	0.792193	1.04648	0.612955	0.751412	0.784898	0.743631	0.284352	0.411618	0.492028	0.551913	0.831002	0.758567	0.435615	0.286639	0.768556	0.549433	0.586819	0.630072	0.579453	0.73959	0.794054
ESM5GEYL	0.603317	0.74204	0.980786	0.592543	0.62117	0.793558	0.681839	0.437956	0.416303	0.503396	0.558065	0.823948	0.746061	0.438307	0.310679	0.739815	0.542206	0.58492	0.630995	0.58975	0.759458	0.851197
ESM6ZK8Z	0.374417	0.762271	0.991662	0.601317	0.66606	0.819036	0.713253	0.336809	0.395925	0.530273	0.537558	0.833225	0.749498	0.447415	0.187268	0.760024	0.536128	0.619035	0.620757	0.597747	0.778513	0.819548
HSM5FZAE	0.830877	0.788797	1.05793	0.748752	0.821644	0.974095	0.920019	0.379912	0.640312	0.598336	0.565171	0.879181	0.893967	0.562067	0.600484	0.827746	0.716041	0.709256	0.832821	0.757821	0.830843	0.937123
HSM5FZAH	0.685487	0.835172	1.05614	0.715739	0.805837	0.908965	0.863479	0.291567	0.576141	0.483572	0.546186	0.888933	0.882335	0.500782	0.550788	0.826534	0.672078	0.692415	0.788565	0.758189	0.84395	0.886294
HSM5FZAQ	1.00802	0.752805	1.0671	0.64531	0.822528	0.735295	0.758207	0.307228	0.414864	0.460348	0.674775	0.908953	0.777404	0.448167	0.173206	0.691468	0.609669	0.549342	0.599799	0.63913	0.694846	0.801294
HSM5FZAT	0.731126	0.760584	1.06971	0.621835	0.727339	0.860671	0.791231	0.376671	0.517786	0.62983	0.578605	0.847182	0.82615	0.498534	0.710282	0.803485	0.619975	0.691638	0.720956	0.675134	0.835225	0.860077
HSM5FZAU	0.778316	0.741002	1.01551	0.581353	0.695348	0.786055	0.691096	0.304378	0.41421	0.423158	0.58812	0.817875	0.762802	0.433144	0.335637	0.73811	0.561614	0.588438	0.65778	0.607596	0.772913	0.832329
HSM5FZAY	0.677309	0.689168	1.0257	0.621674	0.729261	0.774104	0.693425	0.283564	0.334244	0.454556	0.566115	0.850528	0.744819	0.406651	0.229036	0.730148	0.555815	0.575233	0.517678	0.591911	0.682034	0.770503
HSM5FZB1	0.740641	0.728962	1.00774	0.611266	0.754582	0.836407	0.718786	0.283603	0.399317	0.428725	0.568845	0.841563	0.747746	0.4329	0.310111	0.746898	0.567105	0.543938	0.640264	0.645602	0.755972	0.815116
HSM5FZBF	0.752845	0.805272	1.05855	0.620198	0.743864	0.877972	0.785671	0.310258	0.531914	0.535574	0.570368	0.884271	0.818228	0.451721	0.651174	0.78557	0.636625	0.700448	0.719904	0.737707	0.830159	0.858253
HSM6S4FQ	0.939385	0.756676	1.02742	0.569002	0.834667	0.702993	0.722528	0.240178	0.303471	0.238835	0.653695	0.901433	0.653387	0.392754	0.0954057	0.647046	0.549575	0.496631	0.479843	0.594157	0.668935	0.748746
HSM6S4FS	0.716575	0.793404	0.969015	0.614559	0.667956	0.767978	0.669058	0.310493	0.367112	0.282283	0.594541	0.806681	0.72038	0.376539	0.375121	0.690376	0.547855	0.582153	0.564585	0.59279	0.761325	0.799085
HSM6S4FT	0.74753	0.705726	1.01923	0.615852	0.658897	0.810922	0.690984	0.268321	0.406704	0.461154	0.549646	0.874044	0.711508	0.388428	0.366859	0.726892	0.540607	0.587668	0.587896	0.639974	0.754227	0.807402
HSM6S4GJ	0.938769	0.850823	1.05218	0.695341	0.817534	0.874028	0.92263	0.473706	0.644138	0.667208	0.637676	0.892009	0.866044	0.577176	0.891934	0.769413	0.725082	0.732838	0.85835	0.790711	0.813041	0.962707
HSM7H3WJ	0.791976	0.648733	1.04827	0.650888	0.709745	0.834678	0.747791	0.291206	0.445067	0.482199	0.55093	0.887742	0.794418	0.446325	0.325749	0.756947	0.60125	0.652463	0.637089	0.673597	0.749696	0.80654
HSM7H3WM	0.777175	0.79076	1.02889	0.644824	0.688439	0.808422	0.701337	0.271976	0.427089	0.435726	0.568663	0.866758	0.724383	0.400093	0.458791	0.720728	0.567816	0.590964	0.575895	0.66605	0.761213	0.813112
HSM7H3WN	0.713944	0.75461	1.06354	0.644412	0.75839	0.813971	0.773482	0.239422	0.423247	0.491555	0.526132	0.873371	0.782609	0.426224	0.275247	0.755415	0.586632	0.640186	0.674376	0.627713	0.741503	0.82121
HSM7H3WW	0.697485	0.60675	1.02138	0.592445	0.737485	0.739988	0.657088	0.217211	0.30908	0.419061	0.583013	0.862843	0.698619	0.386384	0.253023	0.707951	0.550432	0.541761	0.482594	0.568728	0.663988	0.742239
HSM7H3WX	0.612392	0.693585	0.981117	0.605392	0.59901	0.754118	0.639782	0.232043	0.363822	0.342135	0.544212	0.827767	0.726705	0.383645	0.28142	0.739388	0.53987	0.551676	0.573756	0.572831	0.755121	0.788832
HSM9JBV	0.534705	0.662093	1.04565	0.642842	0.640226	0.82942	0.704865	0.29133	0.414013	0.527557	0.521969	0.860269	0.761298	0.431041	0.423069	0.764886	0.574767	0.610968	0.612111	0.651914	0.773618	0.841682
HSM9JBW	0.657791	0.686291	1.03144	0.637847	0.666772	0.864933	0.726203	0.270272	0.404501	0.483891	0.512644	0.837105	0.774902	0.414823	0.372918	0.739651	0.596438	0.59548	0.626342	0.63986	0.767423	0.856727
HSM9JTBY	0.538662	0.620612	1.03641	0.596696	0.685119	0.828865	0.730751	0.229055	0.374909	0.398553	0.457519	0.827014	0.779537	0.421797	0.219412	0.756758	0.571023	0.608632	0.621506	0.587102	0.736656	0.846197
MSM5LWL1	0.692737	0.797165	1.03789	0.634629	0.666786	0.930874	0.781085	0.39644	0.527717	0.596582	0.561912	0.847482	0.810531	0.483556	0.67083	0.808836	0.632302	0.681059	0.769604	0.69192	0.832851	0.907545
MSM719MT	0.455565	0.705339	1.02195	0.587185	0.596606	0.855443	0.705767	0.274891	0.43542	0.559642	0.478016	0.853226	0.76813	0.431284	0.503822	0.780619	0.553775	0.681884	0.676565	0.675871	0.814772	0.853177
MSM719MZ	0.781248	0.781869	1.05664	0.651508	0.708064	0.86366	0.805247	0.348396	0.483408	0.51771	0.616053	0.85257	0.838916	0.488149	0.56918	0.796754	0.62309	0.693618	0.733056	0.662235	0.808754	0.884385
MSM719N1	0.743146	0.705	1.0558	0.60681	0.764049	0.806545	0.751736	0.291635	0.39739	0.456143	0.590627	0.868544	0.769057	0.422754	0.393959	0.739494	0.585532	0.609849	0.608902	0.631268	0.707489	0.772534
PSM6XBZD	0.593082	0.701835	1.02901	0.659895	0.62427	0.879902	0.738502	0.324836	0.469121	0.511049	0.522837	0.840991	0.810299	0.454416	0.432349	0.777886	0.571954	0.699089	0.704219	0.681634	0.830104	0.863668
PSM6XBZO	0.705122	0.714906	1.0277	0.624145	0.637117	0.846602	0.723846	0.389091	0.43653	0.561794	0.612986	0.840606	0.786536	0.456454	0.398351	0.77772	0.589401	0.636797	0.685048	0.646438	0.838987	0.842928
PSM6XBZQ	0.654125	0.757311	0.987263	0.633043	0.692985	0.781225	0.681907	0.29062	0.384146	0.380579	0.55823	0.82447	0.742701	0.409946	0.319414	0.711231	0.554658	0.5703	0.581424	0.590991	0.790406	0.822957
PSM6XC11	0.839135	0.68858	1.06967	0.639961	0.792043	0.719595	0.724946	0.271428	0.329987	0.416789	0.609794	0.87709	0.722238	0.408522	0.122228	0.703537	0.570906	0.548754	0.521638	0.60634	0.668105	0.757506
PSM7J4EU	0.700088	0.681493	1.02164	0.612286	0.678643	0.78246	0.690616	0.236029	0.411875	0.412387	0.528706	0.850395	0.737445	0.394437	0.312494	0.745557	0.543928	0.529061	0.597959	0.613434	0.767442	0.81489
PSM7J4F4	0.959545	0.78708	1.08645	0.731846	0.831539	0.871989	0.863533	0.367676	0.569178	0.593607	0.573026	0.878423	0.873792	0.544896	0.516817	0.771811	0.691803	0.731718	0.815098	0.743563	0.824796	0.908885

## Sheet: Clinical_Feature
External ID	ConsensusCluster	CRP (mg/L)	ESR (mm/hr)
CSM5FZ1O	1	0.04	5
CSM5FZ1M	1	0.04	5
CSM5FZ1Q	1	3.22	23
CSM5FZ1R	1	3.22	23
CSM5FZ1S	1	3.22	23
CSM5FZ1W	1	0.14	3
CSM5FZ1T	1	0.14	3
CSM5FZ22	1	0.07	16
CSM5FZ24	1	0.07	16
CSM5FZ23	1	0.07	16
CSM5FZ27	1	0.13	6
CSM5FZ28	1	0.13	6
CSM5FZ29	1	0.13	6
CSM5FZ2D	1	0.04	5
CSM5FZ2E	1	0.04	5
CSM5FZ2F	1	0.04	5
CSM5FZ2O	1	0.68	9
CSM5FZ2Q	1	0.68	9
CSM5FZ2R	1	0.18	2
CSM5FZ2S	1	0.18	2
CSM5FZ2T	1	0.18	2
CSM5FZ34	1	0.02	4
CSM5FZ37	1	0.02	4
CSM5FZ3A	1	0.12	5
CSM5FZ3B	1	0.12	5
CSM5FZ3C	1	0.12	5
CSMDRVXF	1	0.39	23
CSMDRVXG	1	0.39	23
CSMDRVXH	1	0.39	23
CSMDRVXJ	1	0.15	4
CSMDRVXN	1	0.2	3
CSMDRVXK	1	0.2	3
CSMDRVXL	1	0.2	3
CSMDRVXP	1	0.06	5
CSMDRVXR	1	0.06	5
CSMDRVXX	1	0.03	2
CSMDTZ4Y	1	0.03	2
CSMDTZ4X	1	0.03	2
CSMDRVXY	1	0.17	7
CSMDRVY1	1	0.17	7
CSMDRVY4	1	0.73	25
CSMDRVY2	1	0.73	25
CSMDRVY3	1	0.73	25
CSMDRVY7	1	0.02	5
CSMDRVY5	1	0.02	5
CSMDRVY6	1	0.02	5
ESM5GEYI	1	0.5	61
ESM5GEYA	1	0.5	9
ESM5GEY9	1	9.3	49
ESM5GEY7	1	9.3	49
HSM5FZAM	1	1.39	10
HSM5FZAN	1	1.39	10
HSM5FZAR	1	5.16	14
HSM5FZBG	1	2.55	31
HSM5FZBC	1	0.2	10
HSM5FZBB	1	0.2	10
HSM5FZAS	1	5.49	67
HSM6S4FR	1	0.29	19
HSM6S4FU	1	3.21	43
HSM6S4GL	1	6.33	58
HSM6S4GK	1	6.33	58
HSM7H3WL	1	2.34	36
HSM7H3WK	1	2.34	36
HSM7H3WO	1	3.35	42
HSM7H3WP	1	3.35	42
HSM7H3WY	1	0.29	7
HSM9JBU	1	1.8	10
HSM9JTBZ	1	14	50
HSM9UBMO	1	0.29	11
HSM9UBMN	1	0.29	11
HSM9UBMP	1	0.29	11
HSM9UBMR	1	0.29	10
HSM9UBMQ	1	0.29	10
MSM5LWL5	1	116.2	74
MSM5LWL2	1	116.2	74
MSM719MD	1	67.3	48
MSM719MS	1	31.9	38
PSM6XBZC	1	1.8	33
PSM6XBZP	1	0.14	14
PSM6XBZR	1	0.03	17
PSM6XC15	1	2.7	40
PSM6XBZZ	1	2.7	40
PSM6XBZY	1	2.7	40
PSM7J4EV	1	14.7	25
CSM5FZ1O	1	0.04	5
CSM5FZ1M	1	0.04	5
CSM5FZ1R	1	3.22	23
CSM5FZ1S	1	3.22	23
CSM5FZ1Q	1	3.22	23
CSM5FZ1T	1	0.14	3
CSM5FZ1W	1	0.14	3
CSM5FZ22	1	0.07	16
CSM5FZ23	1	0.07	16
CSM5FZ24	1	0.07	16
CSM5FZ28	1	0.13	6
CSM5FZ29	1	0.13	6
CSM5FZ27	1	0.13	6
CSM5FZ2E	1	0.04	5
CSM5FZ2F	1	0.04	5
CSM5FZ2D	1	0.04	5
CSM5FZ2O	1	0.68	9
CSM5FZ2Q	1	0.68	9
CSM5FZ2S	1	0.18	2
CSM5FZ2T	1	0.18	2
CSM5FZ2R	1	0.18	2
CSM5FZ37	1	0.02	4
CSM5FZ34	1	0.02	4
CSM5FZ3A	1	0.12	5
CSM5FZ3C	1	0.12	5
CSM5FZ3B	1	0.12	5
ESM5GEYI	1	0.5	61
ESM5GEYA	1	0.5	9
ESM5GEY7	1	9.3	49
ESM5GEY9	1	9.3	49
HSM5FZAM	1	1.39	10
HSM5FZAN	1	1.39	10
HSM5FZAR	1	5.16	14
HSM5FZBG	1	2.55	31
HSM5FZBC	1	0.2	10
HSM5FZBB	1	0.2	10
HSM5FZAS	1	5.49	67
HSM6S4FR	1	0.29	19
HSM6S4FU	1	3.21	43
HSM6S4GL	1	6.33	58
HSM6S4GK	1	6.33	58
HSM7H3WL	1	2.34	36
HSM7H3WK	1	2.34	36
HSM7H3WO	1	3.35	42
HSM7H3WP	1	3.35	42
HSM7H3WY	1	0.29	7
HSM9JBU	1	1.8	10
HSM9JTBZ	1	14	50
HSM9UBMN	1	0.29	11
HSM9UBMO	1	0.29	11
HSM9UBMP	1	0.29	11
HSM9UBMR	1	0.29	10
HSM9UBMQ	1	0.29	10
MSM5LWL2	1	116.2	74
MSM5LWL5	1	116.2	74
MSM719MD	1	67.3	48
MSM719MS	1	31.9	38
PSM6XBZC	1	1.8	33
PSM6XBZP	1	0.14	14
PSM6XBZR	1	0.03	17
PSM6XBZZ	1	2.7	40
PSM6XC15	1	2.7	40
PSM7J4EV	1	14.7	25
PSM6XC11	2	1.5	27
CSM5FZ1N	2	0.04	5
CSM5FZ1U	2	0.14	3
CSM5FZ1V	2	0.14	3
CSM5FZ2I	2	0.07	21
CSM5FZ2G	2	0.07	21
CSM5FZ2H	2	0.07	21
CSM5FZ2P	2	0.68	9
CSM5FZ36	2	0.02	4
CSM5FZ35	2	0.02	4
CSMDRVXM	2	0.2	3
CSMDRVXO	2	0.06	5
CSMDRVXZ	2	0.17	7
ESM5GEYK	2	0.5	61
ESM5GEYL	2	0.5	61
ESM6ZK8Z	2	0.5	9
ESM5GEYB	2	0.5	9
ESM5GEY8	2	9.3	49
HSM5FZAH	2	4.5	42
HSM5FZAE	2	4.5	42
HSM5FZAQ	2	5.16	14
HSM5FZBF	2	2.55	31
HSM5FZB1	2	5.4	62
HSM5FZAY	2	5.4	62
HSM5FZAU	2	5.49	67
HSM5FZAT	2	5.49	67
HSM6S4FQ	2	0.29	19
HSM6S4FS	2	0.29	19
HSM6S4FT	2	3.21	43
HSM6S4GJ	2	6.33	58
HSM7H3WM	2	2.34	36
HSM7H3WN	2	3.35	42
HSM7H3WX	2	0.29	7
HSM7H3WW	2	0.29	7
HSM9JBW	2	1.8	10
HSM9JBV	2	1.8	10
HSM9JTBY	2	14	50
MSM5LWL1	2	116.2	74
MSM719MT	2	31.9	38
MSM719N1	2	2	34
MSM719MZ	2	2	34
PSM6XBZD	2	1.8	33
PSM6XBZO	2	0.14	14
PSM6XBZQ	2	0.03	17
PSM7J4EU	2	14.7	25
CSM5FZ1N	2	0.04	5
CSM5FZ1V	2	0.14	3
CSM5FZ1U	2	0.14	3
CSM5FZ2H	2	0.07	21
CSM5FZ2I	2	0.07	21
CSM5FZ2G	2	0.07	21
CSM5FZ2P	2	0.68	9
CSM5FZ35	2	0.02	4
CSM5FZ36	2	0.02	4
ESM5GEYL	2	0.5	61
ESM5GEYK	2	0.5	61
ESM5GEYB	2	0.5	9
ESM6ZK8Z	2	0.5	9
ESM5GEY8	2	9.3	49
HSM5FZAE	2	4.5	42
HSM5FZAH	2	4.5	42
HSM5FZAQ	2	5.16	14
HSM5FZBF	2	2.55	31
HSM5FZAY	2	5.4	62
HSM5FZB1	2	5.4	62
HSM5FZAT	2	5.49	67
HSM5FZAU	2	5.49	67
HSM6S4FQ	2	0.29	19
HSM6S4FS	2	0.29	19
HSM6S4FT	2	3.21	43
HSM6S4GJ	2	6.33	58
HSM7H3WM	2	2.34	36
HSM7H3WN	2	3.35	42
HSM7H3WX	2	0.29	7
HSM7H3WW	2	0.29	7
HSM9JBW	2	1.8	10
HSM9JBV	2	1.8	10
HSM9JTBY	2	14	50
MSM5LWL1	2	116.2	74
MSM719MT	2	31.9	38
MSM719N1	2	2	34
MSM719MZ	2	2	34
PSM6XBZD	2	1.8	33
PSM6XBZO	2	0.14	14
PSM6XBZQ	2	0.03	17
PSM7J4EU	2	14.7	25

## Sheet: IBD cytokines m6A midifications
m6A ID	Position	Strand	Gene	Gene Region	PubMed ID	GSE	Technique	Cell line/Tissue
human_m6A_97208	chr2:234198552	+	ATG16L1	exonic	31257032	GSE122961	MAZTER-seq	ESC
human_m6A_97209	chr2:234203098	+	ATG16L1	3’UTR	31279658	GSE122948	miCLIP	HEK293T
human_m6A_97210	chr2:234203165	+	ATG16L1	3’UTR	26404942	GSE71154	m6A-CLIP-seq	CD8T
human_m6A_97211	chr2:234203194	+	ATG16L1	3’UTR	28637692	GSE86336	m6A-CLIP-seq	HeLa
human_m6A_97212	chr2:234203254	+	ATG16L1	3’UTR	31328227	GSE128699	miCLIP	HCT116
human_m6A_97213	chr2:234203442	+	ATG16L1	3’UTR	26121403	GSE63753	miCLIP	HEK293
human_m6A_97214	chr2:234203478	+	ATG16L1	3’UTR	26121403	GSE63753	miCLIP	HEK293
human_m6A_97215	chr2:234203485	+	ATG16L1	3’UTR	26404942	GSE71154	m6A-CLIP-seq	A549
human_m6A_18339	chr10:8115706	+	GATA3	exonic	31281898	GSE125240	m6A-REF-seq	kidney
human_m6A_18340	chr10:8116222	+	GATA3	3’UTR	26404942	GSE71154	m6A-CLIP-seq	A549
human_m6A_18341	chr10:8116258	+	GATA3	3’UTR	31279658	GSE122948	miCLIP	HEK293T
human_m6A_22227	chr10:8203933	-	GATA3	ncRNA_exonic	26593424	GSE73405	miCLIP	HepG2
human_m6A_22225	chr10:8079395	-	GATA3-AS1	intergenic	26593424	GSE73405	miCLIP	HEK293T
human_m6A_22226	chr10:8093608	-	GATA3-AS1	ncRNA_intronic	26593424	GSE73405	miCLIP	HEK293T
human_m6A_33815	chr11:117855453	-	IL10RA	intergenic	26404942	GSE71154	m6A-CLIP-seq	A549
human_m6A_33814	chr11:117847247	-	IL10RA	intergenic	26404943	GSE71155	m7A-CLIP-seq	A550
human_m6A_29604	chr11:117870649	+	IL10RA	3’UTR	26404944	GSE71156	m8A-CLIP-seq	A551
human_m6A_29603	chr11:117870631	+	IL10RA	3’UTR	26404945	GSE71157	m9A-CLIP-seq	A552
human_m6A_29601	chr11:117869830	+	IL10RA	exonic	26404942	GSE71154	m6A-CLIP-seq	A549
human_m6A_29600	chr11:117869653	+	IL10RA	exonic	26404942	GSE71154	m6A-CLIP-seq	A549
human_m6A_108925	chr21:34640756	+	IL10RB	exonic	31279658	GSE122948	miCLIP	HEK293T
human_m6A_108926	chr21:34668745	+	IL10RB	3’UTR	28920958	GSE98623	miCLIP	MOLM13
human_m6A_108927	chr21:34668757	+	IL10RB	3’UTR	28920958	GSE98623	miCLIP	MOLM13
human_m6A_108928	chr21:34668784	+	IL10RB	3’UTR	26404942	GSE71154	m6A-CLIP-seq	CD8T
human_m6A_108929	chr21:34668792	+	IL10RB	3’UTR	28920958	GSE98623	miCLIP	MOLM13
human_m6A_108931	chr21:34668859	+	IL10RB	3’UTR	28637692	GSE86336	m6A-CLIP-seq	HeLa
human_m6A_108930	chr21:34668799	+	IL10RB	3’UTR	26404942	GSE71154	m6A-CLIP-seq	CD8T
human_m6A_108934	chr21:34669426	+	IL10RB	3’UTR	28637692	GSE86336	m6A-CLIP-seq	HeLa
human_m6A_108933	chr21:34669366	+	IL10RB	3’UTR	28637692	GSE86336	m6A-CLIP-seq	HeLa
human_m6A_108932	chr21:34669343	+	IL10RB	3’UTR	26404942	GSE71154	m6A-CLIP-seq	CD8T
human_m6A_108921	chr21:34637687	+	IL10RB;IFNAR2;IL10RB-AS1	ncRNA_exonic	28920958	GSE98623	miCLIP	MOLM13
human_m6A_108921	chr21:34637687	+	IL10RB;IFNAR2;IL10RB-AS1	ncRNA_exonic	28920958	GSE98623	miCLIP	MOLM13
human_m6A_108922	chr21:34638174	+	IL10RB-AS1	ncRNA_exonic	26593424	GSE73405	miCLIP	HepG2
human_m6A_108923	chr21:34638181	+	IL10RB-AS1	ncRNA_exonic	26593424	GSE73405	miCLIP	HepG2
human_m6A_108924	chr21:34638204	+	IL10RB-AS1	ncRNA_exonic	26593424	GSE73405	miCLIP	HepG2
human_m6A_43724	chr13:21296741	+	IL17D	3’UTR	31281898	GSE125240	m6A-REF-seq	brain
human_m6A_43725	chr13:21297061	+	IL17D	3’UTR	31281898	GSE125240	m6A-REF-seq	brain
human_m6A_45351	chr13:21276745	-	IL17D	upstream	28920958	GSE98623	miCLIP	MOLM13
human_m6A_45352	chr13:21276890	-	IL17D	upstream	26121403	GSE63753	miCLIP	HEK293
human_m6A_45353	chr13:21277529	-	IL17D	5’UTR	31279658	GSE122948	miCLIP	HEK293T
human_m6A_45354	chr13:21277571	-	IL17D	5’UTR	31279658	GSE122948	miCLIP	HEK293T
human_m6A_100829	chr2:113587838	-	IL1B	3’UTR	26404942	GSE71154	m6A-CLIP-seq	A549
human_m6A_100830	chr2:113587900	-	IL1B	3’UTR	26404942	GSE71154	m6A-CLIP-seq	A549
human_m6A_149243	chr6:137411062	-	IL22RA2	intergenic	26593424	GSE73405	miCLIP	HEK293T
human_m6A_36595	chr12:56732634	+	IL23A	upstream	26404942	GSE71154	m6A-CLIP-seq	A549
human_m6A_36596	chr12:56732708	+	IL23A	5’UTR	26404942	GSE71154	m6A-CLIP-seq	A549
human_m6A_36597	chr12:56734034	+	IL23A	3’UTR	26404942	GSE71154	m6A-CLIP-seq	A549
human_m6A_3933	chr1:67656126	+	IL23R	intronic	30867593	GSE121942	miCLIP	HepG2
human_m6A_3933	chr1:67656126	+	IL23R	intronic	30867593	GSE121942	miCLIP	HepG2
human_m6A_150865	chr7:22850927	+	IL6	intergenic	30867593	GSE121942	miCLIP	HepG2
human_m6A_155178	chr7:22813332	-	IL6	ncRNA_exonic	25491922	GSE54921	PA-m6A-seq	HeLa
human_m6A_155179	chr7:22813327	-	IL6	ncRNA_exonic	25491922	GSE54921	PA-m6A-seq	HeLa
human_m6A_6075	chr1:154437804	+	IL6R	exonic	28920958	GSE98623	miCLIP	MOLM13
human_m6A_6076	chr1:154437822	+	IL6R	exonic	28637692	GSE86336	m6A-CLIP-seq	HeLa
human_m6A_6077	chr1:154437837	+	IL6R	exonic	26404942	GSE71154	m6A-CLIP-seq	A549
human_m6A_6078	chr1:154437883	+	IL6R	3’UTR	28637692	GSE86336	m6A-CLIP-seq	HeLa
human_m6A_6079	chr1:154438052	+	IL6R	3’UTR	26404942	GSE71154	m6A-CLIP-seq	A549
human_m6A_6080	chr1:154438093	+	IL6R	3’UTR	28920958	GSE98623	miCLIP	MOLM13
human_m6A_6081	chr1:154438125	+	IL6R	3’UTR	28920958	GSE98623	miCLIP	MOLM13
human_m6A_6082	chr1:154438134	+	IL6R	3’UTR	28637692	GSE86336	m6A-CLIP-seq	HeLa
human_m6A_6083	chr1:154438322	+	IL6R	3’UTR	28920958	GSE98623	miCLIP	MOLM13
human_m6A_6084	chr1:154438331	+	IL6R	3’UTR	28637692	GSE86336	m6A-CLIP-seq	HeLa
human_m6A_6085	chr1:154440838	+	IL6R	3’UTR	31281898	GSE125240	m6A-REF-seq	liver
human_m6A_6086	chr1:154441604	+	IL6R	3’UTR	28637692	GSE86336	m6A-CLIP-seq	HeLa
human_m6A_6087	chr1:154441648	+	IL6R	3’UTR	31281898	GSE125240	m6A-REF-seq	liver
human_m6A_6088	chr1:154441674	+	IL6R	3’UTR	31281898	GSE125240	m6A-REF-seq	kidney
human_m6A_6089	chr1:154450924	+	IL6R	intronic	26593424	GSE73405	miCLIP	HEK293T
human_m6A_6090	chr1:154450939	+	IL6R	intronic	26593424	GSE73405	miCLIP	HEK293T
human_m6A_61280	chr16:50745316	+	NOD2	exonic	28637692	GSE86336	m6A-CLIP-seq	HeLa
human_m6A_142087	chr6:31543364	+	TNF	5’UTR	26404942	GSE71154	m6A-CLIP-seq	A549
human_m6A_142088	chr6:31543417	+	TNF	5’UTR	26404942	GSE71154	m6A-CLIP-seq	A549
human_m6A_142089	chr6:31545324	+	TNF	3’UTR	26404942	GSE71154	m6A-CLIP-seq	A549
human_m6A_142090	chr6:31545448	+	TNF	3’UTR	26404942	GSE71154	m6A-CLIP-seq	A549
human_m6A_142091	chr6:31545637	+	TNF	3’UTR	28637692	GSE86336	m6A-CLIP-seq	HeLa
human_m6A_142092	chr6:31545647	+	TNF	3’UTR	26404942	GSE71154	m6A-CLIP-seq	A549
human_m6A_142094	chr6:31545674	+	TNF	3’UTR	26404942	GSE71154	m6A-CLIP-seq	A549
human_m6A_68691	chr17:26672612	+	TNFAIP1	3’UTR	26404942	GSE71154	m6A-CLIP-seq	CD8T
human_m6A_68703	chr17:26673648	+	TNFAIP1	3’UTR	26404942	GSE71154	m6A-CLIP-seq	CD8T
human_m6A_49655	chr14:103601861	+	TNFAIP2	3’UTR	26404942	GSE71154	m6A-CLIP-seq	CD8T
human_m6A_49658	chr14:103601985	+	TNFAIP2	3’UTR	26404942	GSE71154	m6A-CLIP-seq	CD8T
human_m6A_81963	chr19:4652818	+	TNFAIP8L1	3’UTR	28637692	GSE86336	m6A-CLIP-seq	HeLa
human_m6A_81964	chr19:4652838	+	TNFAIP8L1	3’UTR	26404942	GSE71154	m6A-CLIP-seq	CD8T
human_m6A_81965	chr19:4652891	+	TNFAIP8L1	3’UTR	28637692	GSE86336	m6A-CLIP-seq	HeLa
human_m6A_5848	chr1:151131866	+	TNFAIP8L2	3’UTR	28637692	GSE86336	m6A-CLIP-seq	HeLa
human_m6A_5849	chr1:151131951	+	TNFAIP8L2	3’UTR	28637692	GSE86336	m6A-CLIP-seq	HeLa
human_m6A_5850	chr1:151132097	+	TNFAIP8L2	3’UTR	26404942	GSE71154	m6A-CLIP-seq	A549
human_m6A_166598	chr9:117608388	+	TNFSF15;TNFSF8	ncRNA_exonic	31279658	GSE122948	miCLIP	HEK293T
human_m6A_166598	chr9:117608388	+	TNFSF15;TNFSF8	ncRNA_exonic	31279658	GSE122948	miCLIP	HEK293T
human_m6A_170332	chr9:117656330	-	TNFSF8	intergenic	26404942	GSE71154	m6A-CLIP-seq	A549
human_m6A_170333	chr9:117657689	-	TNFSF8	intergenic	26404942	GSE71154	m6A-CLIP-seq	A549
human_m6A_170334	chr9:117663962	-	TNFSF8	intergenic	26404942	GSE71154	m6A-CLIP-seq	A549
human_m6A_170335	chr9:117664167	-	TNFSF8	downstream	26404942	GSE71154	m6A-CLIP-seq	A549
human_m6A_170336	chr9:117664199	-	TNFSF8	downstream	26404942	GSE71154	m6A-CLIP-seq	A549
human_m6A_170337	chr9:117664528	-	TNFSF8	downstream	26404942	GSE71154	m6A-CLIP-seq	A549
human_m6A_170338	chr9:117664827	-	TNFSF8	downstream	26404942	GSE71154	m6A-CLIP-seq	A549
human_m6A_170339	chr9:117664891	-	TNFSF8	downstream	26404942	GSE71154	m6A-CLIP-seq	A549
human_m6A_170340	chr9:117665071	-	TNFSF8	downstream	26404942	GSE71154	m6A-CLIP-seq	A549
human_m6A_170341	chr9:117665498	-	TNFSF8	3’UTR	26404942	GSE71154	m6A-CLIP-seq	A549
human_m6A_170342	chr9:117666215	-	TNFSF8	exonic	26404942	GSE71154	m6A-CLIP-seq	A549
