# Supplementary material for: A Broad m6A Modification Landscape in Inflammatory Bowel Disease
Source: Front Cell Dev Biol. 2022 Jan 19;9:782636. doi: 10.3389/fcell.2021.782636 (PMC8809481; doi:10.3389/fcell.2021.782636)
Supplement: Supplementary file 2 [file Table3.xlsx]

## Sheet: GSE75214UC
ID	adj.P.Val	P.Value	t	B	logFC	Gene.symbol
8170326	2.43e-05	1.41e-06	5.10457	4.89768	0.295126	FMR1
8118174	3.12e-05	1.92e-06	-5.03189	4.60228	-0.33367	PRRC2A
8051882	4.39e-05	2.95e-06	4.93071	4.19544	0.602245	LRPPRC
8178011	4.82e-05	3.29e-06	-4.9041	4.0893	-0.321809	PRRC2A
8131111	9.71e-05	7.64e-06	-4.70003	3.28761	-0.294588	EIF3B
8146637	0.000123	1.01e-05	4.62996	3.01748	0.318597	YTHDF3
8067593	0.000446	4.83e-05	-4.23276	1.53884	-0.201476	YTHDF1
7980454	0.000529	5.96e-05	4.17752	1.3406	0.286828	ALKBH1
8097066	0.000726	8.68e-05	4.07715	0.985216	0.328893	METTL14
7899519	0.00164	0.000232	-3.80803	0.063982	-0.161823	YTHDF2
8092552	0.00322	0.000523	3.57514	-0.694315	0.46821	IGF2BP2
7903878	0.00366	0.000612	-3.52868	-0.84112	-0.223293	RBM15
7899737	0.00526	0.000947	-3.39828	-1.24497	-0.244763	EIF3I
8005399	0.0265	0.00674	-2.76194	-3.03389	-0.153308	ALKBH5
8138566	0.0281	0.00726	-2.73598	-3.10015	-0.398727	IGF2BP3
8152465	0.059	0.0183	2.39597	-3.9172	0.156875	EIF3H
8094393	0.0591	0.0183	2.39482	-3.9198	0.173072	ZCCHC4
7936614	0.0634	0.02	-2.36148	-3.99467	-0.131109	EIF3A
8135458	0.104	0.0379	2.10132	-4.54614	0.196706	CBLL1
8008151	0.112	0.0416	2.06157	-4.62519	0.107561	IGF2BP1
7971422	0.132	0.0514	-1.96977	-4.80243	-0.133699	ZC3H13
8138670	0.136	0.0538	-1.94991	-4.8398	-0.196991	HNRNPA2B1
7995655	0.196	0.0876	-1.72359	-5.2404	-0.153283	FTO
8126952	0.332	0.18	-1.34817	-5.80111	-0.108765	WTAP
8123129	0.486	0.313	-1.01297	-6.18937	-0.0848857	WTAP
8033899	0.53	0.355	-0.92799	-6.27064	-0.0577074	EIF3G
8075798	0.738	0.595	0.533737	-6.55556	0.0492265	EIF3D
8033479	0.804	0.683	-0.408999	-6.61389	-0.023155	ELAVL1
8107375	0.852	0.753	0.315038	-6.64766	0.0232424	YTHDC2
8080093	0.949	0.911	-0.112377	-6.69069	-0.00662827	RBM15B
8100714	0.965	0.937	0.0789013	-6.69388	0.00500105	YTHDC1
8151842	0.989	0.979	-0.0267673	-6.69662	-0.00163993	KIAA1429

## Sheet: GSE75214CD
ID	adj.P.Val	P.Value	t	B	logFC	Gene.symbol
8005399	1.07e-07	1.83e-10	7.31734	13.5973	0.278136	ALKBH5
8138670	0.00374	0.000246	-3.84117	0.211752	-0.236901	HNRNPA2B1
7899737	0.0042	0.000289	-3.79374	0.061343	-0.243546	EIF3I
8092552	0.0234	0.00303	3.0588	-2.09515	0.342552	IGF2BP2
7936614	0.0254	0.00338	-3.02185	-2.19427	-0.167582	EIF3A
8008151	0.0352	0.00537	2.86282	-2.60995	0.131063	IGF2BP1
7980454	0.0388	0.00621	2.81151	-2.74021	0.207961	ALKBH1
8126952	0.149	0.0424	-2.06253	-4.4125	-0.158553	WTAP
8080093	0.158	0.0463	2.02484	-4.48471	0.0957163	RBM15B
8146637	0.21	0.0708	1.83128	-4.83654	0.120122	YTHDF3
7903878	0.28	0.111	1.61125	-5.19693	0.102624	RBM15
8131111	0.3	0.124	-1.55631	-5.28023	-0.0931173	EIF3B
8170326	0.358	0.165	1.40239	-5.49904	0.0910519	FMR1
7971422	0.38	0.182	1.34712	-5.57232	0.0893066	ZC3H13
8178011	0.394	0.192	1.31565	-5.61281	0.0725777	PRRC2A
8118174	0.438	0.229	1.21234	-5.73924	0.0676306	PRRC2A
8135458	0.455	0.244	1.17425	-5.78334	0.0756324	CBLL1
8123129	0.468	0.255	-1.14602	-5.81515	-0.0776174	WTAP
7995655	0.509	0.294	-1.05576	-5.91183	-0.0740341	FTO
8094393	0.608	0.395	0.856008	-6.09831	0.0551168	ZCCHC4
8138566	0.672	0.467	-0.730627	-6.19581	-0.0794748	IGF2BP3
8067593	0.695	0.495	-0.684858	-6.22762	-0.0250349	YTHDF1
8107375	0.755	0.575	-0.562804	-6.30248	-0.0284684	YTHDC2
7899519	0.785	0.619	-0.499856	-6.33542	-0.0218848	YTHDF2
8033479	0.835	0.693	0.395763	-6.38136	0.0189052	ELAVL1
8051882	0.838	0.698	-0.389324	-6.38386	-0.0369554	LRPPRC
8152465	0.845	0.71	-0.372861	-6.39004	-0.0180606	EIF3H
8075798	0.903	0.814	0.236034	-6.43116	0.0161873	EIF3D
8100714	0.919	0.841	-0.200824	-6.43876	-0.0103094	YTHDC1
8097066	0.93	0.862	0.174003	-6.44372	0.0110343	METTL14
8151842	0.96	0.918	-0.103383	-6.4534	-0.005355	KIAA1429
8033899	0.983	0.964	-0.045184	-6.45767	-0.0022923	EIF3G

## Sheet: GSE75214inflame
ID	adj.P.Val	P.Value	t	B	logFC	Gene.symbol
8092552	8.54e-08	5.25e-09	6.42848	10.1308	0.631407	IGF2BP2
8051882	1.28e-07	8.21e-09	6.3306	9.69493	0.698912	LRPPRC
8146637	9.28e-07	7.89e-08	5.82491	7.48799	0.359912	YTHDF3
8118174	2.3e-06	2.16e-07	-5.594	6.50836	-0.309331	PRRC2A
8178011	4.04e-06	4.12e-07	-5.44378	5.88162	-0.299271	PRRC2A
8097066	2.23e-05	2.75e-06	4.99003	4.04434	0.373177	METTL14
8131111	9.87e-05	1.48e-05	-4.57027	2.42833	-0.270767	EIF3B
8170326	0.0001	1.5e-05	4.56562	2.4109	0.266872	FMR1
7980454	0.000165	2.62e-05	4.4223	1.87992	0.315578	ALKBH1
8067593	0.000334	5.79e-05	-4.21211	1.12141	-0.175114	YTHDF1
8138670	0.00149	0.000318	-3.73818	-0.493739	-0.270446	HNRNPA2B1
7899519	0.00202	0.000447	-3.63852	-0.815501	-0.155878	YTHDF2
7899737	0.00236	0.000536	-3.58531	-0.984617	-0.266513	EIF3I
7903878	0.00325	0.000775	-3.47471	-1.33002	-0.207745	RBM15
8138566	0.00849	0.00233	-3.12925	-2.35411	-0.463224	IGF2BP3
8152465	0.0104	0.00295	3.05226	-2.57061	0.186633	EIF3H
8135458	0.0127	0.00373	2.97416	-2.7857	0.247878	CBLL1
7936614	0.02	0.0063	-2.79429	-3.26337	-0.149324	EIF3A
8094393	0.034	0.0118	2.56728	-3.82998	0.186342	ZCCHC4
8005399	0.0499	0.0188	-2.39148	-4.24006	-0.124792	ALKBH5
8008151	0.0805	0.0334	2.15948	-4.74158	0.119168	IGF2BP1
8126952	0.0971	0.0421	-2.06033	-4.94181	-0.1592	WTAP
7971422	0.13	0.0606	-1.89884	-5.24947	-0.132957	ZC3H13
8123129	0.192	0.1	-1.65993	-5.66173	-0.132116	WTAP
7995655	0.192	0.1	-1.65957	-5.6623	-0.153528	FTO
8075798	0.196	0.103	1.64705	-5.68248	0.132972	EIF3D
8080093	0.341	0.212	1.2571	-6.23754	0.0555013	RBM15B
8033899	0.556	0.415	-0.819159	-6.688	-0.0503966	EIF3G
8100714	0.957	0.931	0.08735	-7.01941	0.00529383	YTHDC1
8033479	0.978	0.963	0.046051	-7.02217	0.00255526	ELAVL1
8107375	0.994	0.99	0.012218	-7.02316	0.0006948	YTHDC2
8151842	0.999	0.999	0.001563	-7.02323	9.856e-05	KIAA1429

## Sheet: GSE75214uninflame
ID	adj.P.Val	P.Value	t	B	logFC	Gene.symbol
8170326	0.0142	0.000371	3.76646	0.00086	0.216525	FMR1
8131111	0.0279	0.0012	-3.396	-1.06194	-0.225834	EIF3B
8067593	0.0329	0.00159	-3.30355	-1.3158	-0.149317	YTHDF1
7899737	0.0983	0.0114	-2.60641	-3.0642	-0.172813	EIF3I
7903878	0.124	0.0174	-2.44459	-3.42403	-0.133684	RBM15
8118174	0.131	0.0192	-2.4053	-3.50857	-0.15885	PRRC2A
7980454	0.132	0.0195	2.39801	-3.52412	0.126202	ALKBH1
8008151	0.152	0.0249	2.29875	-3.73211	0.0884299	IGF2BP1
8178011	0.164	0.0289	-2.23747	-3.85686	-0.146276	PRRC2A
7899519	0.182	0.0347	-2.15979	-4.01088	-0.0861901	YTHDF2
7936614	0.233	0.0548	-1.95756	-4.38979	-0.102255	EIF3A
8146637	0.253	0.0637	1.88809	-4.51242	0.118459	YTHDF3
8080093	0.315	0.0953	-1.69375	-4.83442	-0.0926076	RBM15B
7995655	0.356	0.12	-1.57695	-5.01267	-0.0939911	FTO
8075798	0.409	0.157	-1.43289	-5.21631	-0.115104	EIF3D
8033479	0.427	0.171	-1.38532	-5.27956	-0.0571564	ELAVL1
8097066	0.457	0.196	1.30703	-5.3793	0.0849414	METTL14
8094393	0.51	0.241	1.18294	-5.52612	0.0733999	ZCCHC4
8138670	0.74	0.507	-0.666789	-5.98454	-0.0584304	HNRNPA2B1
8135458	0.764	0.543	0.611882	-6.01854	0.0466199	CBLL1
7971422	0.766	0.547	-0.606093	-6.02196	-0.0365715	ZC3H13
8107375	0.8	0.6	0.527383	-6.06522	0.0363539	YTHDC2
8123129	0.841	0.669	0.430086	-6.11047	0.0219662	WTAP
8151842	0.843	0.673	-0.424306	-6.11287	-0.0210798	KIAA1429
8051882	0.846	0.679	0.41586	-6.11632	0.0477375	LRPPRC
8092552	0.847	0.68	-0.413773	-6.11716	-0.025887	IGF2BP2
8033899	0.856	0.695	-0.394292	-6.12482	-0.0208761	EIF3G
8100714	0.881	0.744	-0.327703	-6.14821	-0.0175934	YTHDC1
8138566	0.899	0.781	0.279277	-6.16251	0.0177423	IGF2BP3
8152465	0.934	0.847	0.193898	-6.18219	0.0117227	EIF3H
8126952	0.948	0.878	0.153798	-6.18899	0.00849634	WTAP
8005399	0.967	0.92	0.10107	-6.19554	0.00511124	ALKBH5

## Sheet: GSE9686pediatric IBD
ID	adj.P.Val	P.Value	t	B	logFC	GB_ACC	Gene
NM_152858_at	0.00158	5.08e-05	-4.6439	1.92532	-0.414071	NM_152858	WTAP
NM_152857_at	0.00158	5.09e-05	-4.64302	1.92292	-0.414038	NM_152857	WTAP
NM_003753_at	0.007478	0.00124	-3.52737	-1.03036	-0.366872	NM_003753	EIF3D
NM_006546_at	0.011688	0.00258	3.25648	-1.70026	0.225097	NM_006546	IGF2BP1
NM_016258_at	0.018024	0.00496	-3.00794	-2.29109	-0.219881	NM_016258	YTHDF2
NM_022768_at	0.022767	0.00703	-2.87147	-2.60445	-0.21332	NM_022768	RBM15
NM_017758_at	0.026799	0.00888	-2.77858	-2.81286	-0.221626	NM_017758	ALKBH5
NM_133259_at	0.033149	0.012	2.65747	-3.07822	0.416067	NM_133259	LRPPRC
NM_015070_at	0.045622	0.0186	2.47272	-3.46828	0.217111	NM_015070	ZC3H13
NM_006020_at	0.056534	0.025	2.3458	-3.72514	0.172534	NM_006020	ALKBH1
NM_006548_at	0.069354	0.0328	2.22619	-3.95841	0.248975	NM_006548	IGF2BP2
NM_001007225_at	0.074869	0.0364	2.18014	-4.04585	0.242358	NM_001007225	IGF2BP2
NM_001031732_at	0.081035	0.0403	-2.13335	-4.1333	-0.133274	NM_001031732	YTHDC1
NM_003750_at	0.085748	0.0434	-2.09939	-4.19588	-0.143668	NM_003750	EIF3A
NM_133370_at	0.111918	0.0615	-1.93497	-4.48787	-0.120183	NM_133370	YTHDC1
NM_003755_at	0.148411	0.0881	-1.75641	-4.78343	-0.131607	NM_003755	EIF3G
NM_001037808_at	0.175045	0.109	1.64722	-4.95252	0.21281	NM_001037808	EIF3C
NM_003752_at	0.175398	0.109	1.64561	-4.95495	0.212501	NM_003752	EIF3C
NM_001419_at	0.211638	0.139	-1.51628	-5.14313	-0.0965736	NM_001419	ELAVL1
NM_020961_at	0.213561	0.14	-1.51001	-5.15192	-0.152276	NM_020961	METTL14
NM_003751_at	0.241384	0.164	1.42402	-5.2692	0.145151	NM_003751	EIF3B
NM_001037283_at	0.24399	0.166	1.41591	-5.27996	0.142166	NM_001037283	EIF3B
NM_017798_at	0.275774	0.194	-1.32447	-5.39738	-0.0939849	NM_017798	YTHDF1
NM_003757_at	0.328927	0.242	-1.191	-5.55608	-0.113719	NM_003757	EIF3I
NM_019852_at	0.404757	0.313	1.02349	-5.73327	0.153701	NM_019852	METTL3
NM_004906_at	0.430281	0.339	0.97087	-5.78375	0.141954	NM_004906	WTAP
NM_004638_at	0.468759	0.377	0.895671	-5.85152	0.119057	NM_004638	PRRC2A
NM_080686_at	0.477841	0.386	0.878749	-5.86606	0.117222	NM_080686	PRRC2A
NM_006547_at	0.575585	0.487	-0.702306	-6.00174	-0.265445	NM_006547	IGF2BP3
NM_004500_at	0.643908	0.564	-0.582852	-6.0769	-0.0605175	NM_004500	HNRNPC
NM_152758_at	0.644763	0.565	-0.581209	-6.07784	-0.0589951	NM_152758	YTHDF3
NM_031314_at	0.649868	0.571	-0.572572	-6.08273	-0.0594708	NM_031314	HNRNPC
NM_022828_at	0.706027	0.633	-0.481764	-6.1298	-0.0381386	NM_022828	YTHDC2
NM_013286_at	0.801983	0.748	-0.324168	-6.19246	-0.0194428	NM_013286	RBM15B
NM_003756_at	0.829579	0.781	0.279649	-6.20575	0.0210676	NM_003756	EIF3H
NM_002137_at	0.933681	0.913	-0.110192	-6.23847	-0.0092061	NM_002137	HNRNPA2B1
NM_031243_at	0.934052	0.913	-0.109572	-6.23853	-0.0091445	NM_031243	HNRNPA2B1
NM_002024_at	0.938816	0.919	-0.102035	-6.23932	-0.0191806	NM_002024	FMR1

## Sheet: GSE119600blood
	logFC	AveExpr	t	P.Value	adj.P.Val	B
EIF3A	-156.091	718.536	-5.25089	3.41e-07	1.5e-05	1.54629
YTHDF3	56.1075	384.706	4.71868	4.1e-06	8.47e-05	0.378406
KIAA1429	43.5069	289.087	4.61006	6.64e-06	8.47e-05	0.151182
WTAP	53.7984	299.992	4.57643	7.7e-06	8.47e-05	0.0816307
YTHDF1	80.4045	636.708	4.1018	5.67e-05	0.000498992	-0.858042
YTHDC1	-16.9499	103.186	-3.67709	0.00029299	0.00199803	-1.62881
HNRNPA2B1	83.2776	398.932	3.65503	0.000317868	0.00199803	-1.66695
METTL3	25.6708	243.979	3.45726	0.000648662	0.00356764	-2.00018
KIAA1429	17.4546	118.791	3.18235	0.00166003	0.00811572	-2.43691
YTHDC2	7.1973	94.8839	3.07009	0.00239409	0.010534	-2.60616
YTHDC1	156.602	1659.48	2.89443	0.00415954	0.0166382	-2.86018
WTAP	-4.6892	86.1411	-2.77161	0.00602916	0.0221069	-3.02982

## Sheet: GSE33943PBL
ID	adj.P.Val	P.Value	t	B	logFC	Gene.symbol
222430_s_at	3.72e-06	3.66e-08	6.31676	8.58974	0.819	YTHDF2
236274_at	4.98e-06	5.4e-08	6.21627	8.21692	0.445	EIF3B
242550_at	5.94e-06	7e-08	6.14908	7.96828	0.851	EIF3B
234302_s_at	2.27e-05	4.24e-07	5.67902	6.24571	0.38	ALKBH5
228556_at	5.4e-05	1.31e-06	5.37837	5.16366	0.443	YTHDC1
242111_at	0.000112	3.37e-06	5.12444	4.26484	0.504	METTL3
200596_s_at	0.000173	5.86e-06	4.97377	3.73915	0.525	EIF3A
208688_x_at	0.000283	1.11e-05	4.79643	3.12845	0.433	EIF3B
227621_at	0.000329	1.37e-05	-4.73928	2.93364	-0.7	WTAP
209702_at	0.000434	1.95e-05	4.64009	2.59802	0.566	FTO
211501_s_at	0.000485	2.25e-05	4.59945	2.46141	0.36	EIF3B
229630_s_at	0.000852	4.73e-05	-4.38774	1.75913	-0.666	WTAP
203462_x_at	0.00114	6.88e-05	4.27942	1.40616	0.372	EIF3B
221741_s_at	0.00129	8.18e-05	4.2286	1.24214	0.334	YTHDF1
201726_at	0.00241	0.000183	3.98912	0.48351	0.414	ELAVL1
212081_x_at	0.00269	0.000212	3.94577	0.34884	0.285	PRRC2A
226987_at	0.00405	0.000364	3.7799	-0.158516	0.238	RBM15B
201727_s_at	0.00465	0.000439	3.72189	-0.33286	0.253	ELAVL1
223110_at	0.00503	0.000488	3.68932	-0.430026	0.249	KIAA1429
1557360_at	0.00817	0.000939	3.48127	-1.0379	0.526	LRPPRC
209851_at	0.00855	0.000998	-3.46155	-1.09433	-0.278	ZC3H13
203820_s_at	0.00877	0.00103	-3.45044	-1.12603	-0.467	IGF2BP3
214759_at	0.00924	0.00111	-3.42704	-1.19258	-0.233	WTAP
209265_s_at	0.0153	0.00221	3.19855	-1.82623	0.42	METTL3
1564053_a_at	0.0182	0.00281	-3.11696	-2.04513	-0.495	YTHDF3
208132_x_at	0.0234	0.00395	2.99872	-2.35512	0.221	PRRC2A
1555760_a_at	0.0292	0.00538	-2.88907	-2.63472	-0.233	RBM15
220018_at	0.0368	0.0075	2.76778	-2.93486	0.332	CBLL1
228455_at	0.0405	0.00855	2.71925	-3.05219	0.48	RBM15
1568941_a_at	0.0425	0.00915	2.69422	-3.11207	0.226	HNRNPC
200005_at	0.0432	0.00937	2.68516	-3.13365	0.278	EIF3D
220473_s_at	0.0923	0.0276	-2.25849	-4.08293	-0.125	ZCCHC4
205836_s_at	0.0954	0.0289	-2.23814	-4.12481	-0.303	YTHDC2
240459_at	0.1	0.0311	-2.20754	-4.18722	-0.164	YTHDC1
208887_at	0.104	0.0328	2.18579	-4.23111	0.211	EIF3G
1560274_at	0.121	0.0404	-2.09541	-4.40959	-0.178	WTAP
203819_s_at	0.157	0.0588	-1.92651	-4.72561	-0.239	IGF2BP3
227746_at	0.161	0.0606	1.91279	-4.75025	0.201	ELAVL1
217812_at	0.161	0.0609	1.91023	-4.75483	0.2	YTHDF2
221749_at	0.175	0.0686	-1.85429	-4.8536	-0.38	YTHDF3
215245_x_at	0.179	0.0713	-1.83636	-4.88471	-0.438	FMR1
213653_at	0.196	0.0813	1.77301	-4.99244	0.14	METTL3
232971_at	0.197	0.0818	-1.77012	-4.99727	-0.0731	RBM15
216493_s_at	0.206	0.0875	-1.73713	-5.05196	-0.0928	IGF2BP3
200751_s_at	0.212	0.0916	-1.71479	-5.08845	-0.251	HNRNPC
227601_at	0.219	0.096	1.69122	-5.1265	0.214	METTL14
220472_at	0.224	0.0994	-1.67391	-5.15414	-0.105	ZCCHC4
212455_at	0.236	0.107	1.63415	-5.21665	0.213	YTHDC1
205621_at	0.241	0.111	1.61891	-5.24024	0.113	ALKBH1
235500_at	0.293	0.147	1.46805	-5.46281	0.133	HNRNPC
212626_x_at	0.316	0.165	-1.4051	-5.54972	-0.119	HNRNPC
230194_at	0.326	0.173	1.38045	-5.58278	0.0974	LRPPRC
1555761_x_at	0.333	0.178	-1.36149	-5.60783	-0.0958	RBM15
236700_at	0.337	0.181	1.35311	-5.6188	0.184	EIF3C
203689_s_at	0.35	0.192	-1.31992	-5.66163	-0.288	FMR1
210285_x_at	0.391	0.225	-1.22476	-5.77883	-0.133	WTAP
218847_at	0.391	0.226	1.22315	-5.78074	0.251	IGF2BP2
214737_x_at	0.415	0.247	-1.16876	-5.84391	-0.111	HNRNPC
201592_at	0.423	0.254	1.15172	-5.86314	0.134	EIF3H
238818_at	0.44	0.269	-1.11559	-5.90301	-0.0823	KIAA1429
225932_s_at	0.445	0.273	1.10565	-5.91377	0.176	HNRNPA2B1
236721_at	0.45	0.278	-1.09512	-5.92507	-0.0782	ALKBH1
202689_at	0.466	0.294	1.0595	-5.96251	0.0679	RBM15B
208756_at	0.506	0.333	0.976196	-6.04539	0.0894	EIF3I
200597_at	0.507	0.334	0.974136	-6.04736	0.109	EIF3A
241689_at	0.512	0.339	0.963052	-6.05787	0.106	METTL14
229291_at	0.539	0.367	-0.909074	-6.10739	-0.0732	RBM15
223963_s_at	0.539	0.367	0.908844	-6.1076	0.107	IGF2BP2
211615_s_at	0.541	0.369	0.9054	-6.11067	0.158	LRPPRC
200014_s_at	0.577	0.407	-0.834657	-6.17112	-0.115	HNRNPC
243927_x_at	0.585	0.416	-0.819675	-6.1833	-0.0641	KIAA1429
223689_at	0.609	0.442	-0.773715	-6.21934	-0.0543	IGF2BP1
227536_at	0.615	0.449	-0.761489	-6.22858	-0.0866	ZC3H13
214201_x_at	0.616	0.45	0.760974	-6.22897	0.0658	PRRC2A
244660_at	0.619	0.454	0.754299	-6.23395	0.0362	ELAVL1
241626_at	0.623	0.458	0.747285	-6.23914	0.0574	WTAP
1568680_s_at	0.627	0.462	0.740015	-6.24447	0.07	YTHDC2
203137_at	0.63	0.466	-0.734507	-6.24847	-0.105	WTAP
205292_s_at	0.637	0.474	0.720385	-6.2586	0.0964	HNRNPA2B1
211971_s_at	0.655	0.495	0.686711	-6.28198	0.126	LRPPRC
241574_s_at	0.675	0.519	0.648405	-6.30722	0.0433	IGF2BP1
1569033_at	0.725	0.582	-0.553183	-6.36379	-0.036	IGF2BP3
1555762_s_at	0.729	0.588	-0.545412	-6.36801	-0.101	RBM15
236060_at	0.768	0.638	-0.473283	-6.4044	-0.0268	METTL14
227377_at	0.775	0.647	-0.460807	-6.41018	-0.0445	IGF2BP1
235552_at	0.8	0.682	-0.411691	-6.43143	-0.0583	METTL14
205835_s_at	0.81	0.696	-0.392728	-6.439	-0.0269	YTHDC2
230570_at	0.823	0.716	0.36508	-6.44939	0.052	EIF3H
239905_at	0.832	0.728	-0.349056	-6.45507	-0.0155	YTHDC1
237457_at	0.854	0.76	0.307156	-6.46873	0.0265	EIF3B
227187_at	0.871	0.786	-0.27321	-6.47851	-0.0495	CBLL1
1553101_a_at	0.892	0.818	-0.231195	-6.48904	-0.0159	ALKBH5
225107_at	0.904	0.837	0.206644	-6.49439	0.0406	HNRNPA2B1
244131_at	0.904	0.838	-0.205923	-6.49453	-0.0204	HNRNPA2B1
214814_at	0.908	0.844	-0.198265	-6.49607	-0.0214	YTHDC1
228034_x_at	0.91	0.848	0.192271	-6.49723	0.0186	ALKBH5
200595_s_at	0.923	0.868	-0.167001	-6.50175	-0.0274	EIF3A
219917_at	0.931	0.88	0.151506	-6.5042	0.0179	ZCCHC4
212402_at	0.934	0.884	-0.145999	-6.50502	-0.0173	ZC3H13
219286_s_at	0.945	0.904	-0.121133	-6.50832	-0.0213	RBM15
227110_at	0.957	0.923	-0.0969696	-6.51094	-0.0135	HNRNPC
1570344_at	0.974	0.953	0.0586522	-6.51391	0.00479	LRPPRC
213077_at	0.999	0.999	-0.00153824	-6.51562	-0.000362	YTHDC2

## Sheet: GSE3365PBMCs
	logFC	AveExpr	t	P.Value	adj.P.Val	B
LRPPRC	-27.6116	96.5193	-6.70453	6.1e-10	2.84e-08	2.79827
EIF3A	-55.413	107.087	-6.61034	9.79e-10	2.84e-08	2.62946
YTHDF1	-93.0891	497.339	-5.88826	3.33e-08	6.43e-07	1.3516
YTHDC1	-192.524	972.41	-5.01398	1.77e-06	2.2e-05	-0.131194
METTL3	-31.725	67.6512	-4.99737	1.9e-06	2.2e-05	-0.158397
LRPPRC	-55.053	275.282	-4.92168	2.63e-06	2.54e-05	-0.281834
EIF3B	-85.317	439.087	-4.50758	1.48e-05	0.000118635	-0.940175
RBM15B	35.0836	209.55	4.48281	1.64e-05	0.000118635	-0.978564
EIF3B	-84.1118	368.948	-4.24944	4.13e-05	0.000241001	-1.33434
METTL16	-6.85526	17.0158	-4.24815	4.16e-05	0.000241001	-1.33628
SRSF2	-266.786	2254.22	-3.9906	0.00011118	0.000586224	-1.71544
METTL3	-44.8371	110.61	-3.86426	0.00017744	0.000857629	-1.89588
WTAP	-76.1688	358.754	-3.79081	0.000231756	0.00103399	-1.99903
EIF3B	-15.7381	105.276	-3.51978	0.000601852	0.00249339	-2.36779
YTHDC2	-27.7731	124.721	-3.48265	0.000683265	0.00256951	-2.41681
HNRNPC	-72.8096	225.26	-3.44441	0.000777863	0.00256951	-2.4669
RBM15	-54.6861	267.99	-3.43702	0.00079753	0.00256951	-2.47654
IGF2BP3	5.60429	21.4292	3.42972	0.000817368	0.00256951	-2.48603
EIF3A	-68.8956	509.466	-3.42099	0.000841735	0.00256951	-2.49737
ZC3H13	12.0253	56.1106	3.3961	0.000915021	0.00265356	-2.52961
SRSF2	-145.291	947.257	-3.31618	0.00119271	0.00329415	-2.63191
EIF3H	-231.414	1847.17	-3.12475	0.00220926	0.00582442	-2.86945
IGF2BP2	56.3503	95.2776	3.03328	0.00293859	0.00741035	-2.97912
HNRNPC	47.1724	559.407	2.36102	0.0197597	0.0477525	-3.70287
