# Supplementary material for: A Broad m6A Modification Landscape in Inflammatory Bowel Disease
Source: Front Cell Dev Biol. 2022 Jan 19;9:782636. doi: 10.3389/fcell.2021.782636 (PMC8809481; doi:10.3389/fcell.2021.782636)
Supplement: Supplementary file 4 [file Table4.xlsx]

## Sheet: GSE73661vedolizumab
Responder	GSM1900229	GSM1900300	GSM1900198	GSM1900238	GSM1900237	GSM1900267	GSM1900266	GSM1900194	GSM1900273	GSM1900164	GSM1900279	GSM1900282	GSM1900281	GSM1900270	GSM1900170	GSM1900201	GSM1900306	GSM1900197	GSM1900262	GSM1900261	GSM1900163	GSM1900304
ALKBH5	8.95907	9.20645	8.93894	9.0696	8.89944	9.06795	9.17838	9.0562	9.18597	8.95402	8.89884	9.09019	9.05719	8.89498	9.01187	9.00335	9.15712	8.96838	8.90129	9.17647	8.96708	8.52209
IGF2BP2	8.57797	7.9677	8.47101	7.94025	8.24101	8.53776	8.43355	8.52118	8.55218	7.72868	8.21932	8.16071	8.35049	8.4129	8.32449	8.60266	8.63987	8.18053	8.63843	8.63076	8.26415	7.69677
IGF2BP3	4.52629	4.45662	5.64295	4.70492	4.91796	4.64246	4.63223	4.6522	4.77858	5.99956	4.50114	4.57347	4.43126	4.48925	4.6051	4.30903	4.52679	4.28294	4.49685	4.76979	4.62869	4.81597
LRPPRC	9.2507	9.32765	9.45955	9.55792	8.91941	9.48708	9.72275	9.30418	8.93173	9.11135	9.25668	9.78189	9.204	9.50744	9.87787	9.68967	9.61041	9.66438	9.71576	9.85602	8.81666	8.36839
METTL14	8.04589	7.94159	7.86062	8.19897	7.69295	7.75061	7.92023	7.96286	7.70254	7.9912	7.91708	8.19298	7.80327	7.99019	8.22923	8.0947	8.03326	8.02132	7.98192	8.19646	7.58034	7.78781
YTHDF3	9.0132	8.96799	9.11524	8.99922	8.74038	8.55285	8.80071	9.25443	9.06582	8.82545	8.57023	9.16267	9.0418	9.19541	9.36694	9.36282	9.13718	9.15079	9.07866	9.08969	8.74512	8.30798
ZCCHC4	6.37112	6.60904	6.18748	6.25364	6.01053	6.01938	6.41032	5.92671	6.0634	6.26018	6.31789	6.37844	6.12185	6.40986	6.35901	6.35811	6.68444	6.47425	6.40617	6.52135	5.98003	6.73241
Unresponder	GSM1900289	GSM1900228	GSM1900292	GSM1900275	GSM1900231	GSM1900234	GSM1900191	GSM1900174	GSM1900264	GSM1900166	GSM1900161	GSM1900189	GSM1900286	GSM1900311	GSM1900308	GSM1900272	GSM1900278	GSM1900269	GSM1900167	GSM1900242	GSM1900298	GSM1900169	GSM1900284	GSM1900245	GSM1900249	GSM1900171	GSM1900200	GSM1900252	GSM1900168	GSM1900173	GSM1900258	GSM1900162	GSM1900296	GSM1900295	GSM1900303	GSM1900165	GSM1900196
ALKBH5	9.21421	9.10644	9.29999	9.05478	9.06142	8.99068	8.96907	9.03418	9.09358	9.08212	8.99659	9.01993	9.19351	9.27044	9.09818	9.02743	9.1891	8.8845	9.18106	9.12223	9.13837	9.28027	8.97757	9.11221	8.92109	9.08703	8.93549	9.14899	9.08142	9.28261	9.10415	9.1302	9.11785	9.26393	9.10513	9.08853	9.20145
IGF2BP2	7.66871	8.1685	7.86287	7.48154	8.06583	7.31777	7.8076	7.82561	8.00672	7.42364	8.15396	7.99659	7.72066	8.00329	8.07855	7.83027	7.05142	8.25288	8.12344	7.88596	7.94788	7.77322	7.39219	8.2727	7.58289	7.53968	8.14313	7.04887	8.12006	8.3785	6.85787	7.28977	7.57197	7.91832	7.51582	7.84809	7.78413
IGF2BP3	5.71317	5.28786	4.65091	5.59466	5.52992	5.488	5.50288	4.77402	4.62278	5.37216	4.65454	4.71914	5.00847	5.10117	4.71046	5.10813	5.30456	5.49675	4.75094	5.881	4.91396	6.55209	6.54535	4.9301	5.59432	4.96291	4.74652	5.63041	4.66555	4.90509	5.34085	5.45497	4.82723	5.18502	5.26669	6.67564	5.3206
LRPPRC	9.3658	9.05779	8.82224	9.1631	9.05749	8.93247	8.67958	8.79242	9.42259	8.83173	8.94363	9.00587	8.47615	8.91125	9.06329	8.96833	8.53344	8.9475	9.44035	9.03023	9.33174	8.98677	9.46967	8.62962	8.7544	8.13106	8.83088	8.74506	9.46594	9.03771	7.95851	8.19471	8.73457	9.17131	9.02271	8.91419	8.8207
METTL14	7.93324	7.82496	7.83384	7.97306	7.96717	7.58445	7.56801	7.5569	8.21207	7.85415	7.68448	7.73584	7.26968	7.78541	7.86978	7.99717	7.76015	7.28434	7.89117	7.78345	7.96067	7.62888	7.89238	7.42248	7.462	7.36148	7.63648	7.58881	8.33627	7.96491	7.24758	7.69419	7.06869	7.65541	7.2523	7.83443	7.73226
YTHDF3	8.95404	8.89929	8.96885	8.7523	8.95043	8.38391	8.78252	8.80447	9.2433	8.82908	9.188	8.91574	8.37018	9.02041	8.68914	8.95194	8.5936	8.41778	9.10629	8.50888	9.03789	8.82108	8.6399	8.2059	8.43475	8.9119	8.87683	8.45321	9.16901	9.05265	8.16577	8.46033	8.06888	8.62102	8.28502	8.8297	8.75169
ZCCHC4	6.51823	6.215	5.8066	6.45092	6.27011	6.26513	6.10647	5.89176	6.4097	6.06347	6.03088	5.91598	5.92641	6.34616	6.19737	6.30177	6.38178	5.93926	6.07923	6.07843	6.44939	6.14499	6.37989	5.85161	6.05205	5.75128	5.93794	6.18139	6.69789	6.13488	6.01125	6.268	5.8857	6.2624	6.12525	5.91068	6.17306

## Sheet: GSE73661infliximab
GSM1900178	A	Colonic mucosal biopsy from UC non-responder (NR) 10 week (W) 4-6 after infliximab (IFX) therapy
GSM1900209	A	Colonic mucosal biopsy from UC non-responder (NR) 11 week (W) 4-6 after infliximab (IFX) therapy
GSM1900179	A	Colonic mucosal biopsy from UC non-responder (NR) 19 week (W) 4-6 after infliximab (IFX) therapy
GSM1900203	A	Colonic mucosal biopsy from UC non-responder (NR) 23 week (W) 4-6 after infliximab (IFX) therapy
GSM1900218	A	Colonic mucosal biopsy from UC non-responder (NR) 27 week (W) 4-6 after infliximab (IFX) therapy
GSM1900199	A	Colonic mucosal biopsy from UC non-responder (NR) 31 week (W) 4-6 after infliximab (IFX) therapy
GSM1900188	A	Colonic mucosal biopsy from UC non-responder (NR) 36 week (W) 4-6 after infliximab (IFX) therapy
GSM1900149	A	Colonic mucosal biopsy from UC non-responder (NR) 43 week (W) 4-6 after infliximab (IFX) therapy
GSM1900157	A	Colonic mucosal biopsy from UC non-responder (NR) 45 week (W) 4-6 after infliximab (IFX) therapy
GSM1900219	A	Colonic mucosal biopsy from UC non-responder (NR) 48 week (W) 4-6 after infliximab (IFX) therapy
GSM1900156	A	Colonic mucosal biopsy from UC non-responder (NR) 5 week (W) 4-6 after infliximab (IFX) therapy
GSM1900183	A	Colonic mucosal biopsy from UC non-responder (NR) 53 week (W) 4-6 after infliximab (IFX) therapy
GSM1900187	A	Colonic mucosal biopsy from UC non-responder (NR) 67 week (W) 4-6 after infliximab (IFX) therapy
GSM1900220	A	Colonic mucosal biopsy from UC non-responder (NR) 8 week (W) 4-6 after infliximab (IFX) therapy
GSM1900207	A	Colonic mucosal biopsy from UC non-responder (NR) 9 week (W) 4-6 after infliximab (IFX) therapy
GSM1900177	A	Colonic mucosal biopsy from UC responder (R) 33 week (W) 4-6 after infliximab (IFX) therapy
GSM1900205	A	Colonic mucosal biopsy from UC responder (R) 38 week (W) 4-6 after infliximab (IFX) therapy
GSM1900212	A	Colonic mucosal biopsy from UC responder (R) 46 week (W) 4-6 after infliximab (IFX) therapy
GSM1900160	A	Colonic mucosal biopsy from UC responder (R) 57 week (W) 4-6 after infliximab (IFX) therapy
GSM1900190	A	Colonic mucosal biopsy from UC responder (R) 60 week (W) 4-6 after infliximab (IFX) therapy
GSM1900182	A	Colonic mucosal biopsy from UC responder (R) 65 week (W) 4-6 after infliximab (IFX) therapy
GSM1900193	A	Colonic mucosal biopsy from UC responder (R) 66 week (W) 4-6 after infliximab (IFX) therapy
GSM1900216	A	Colonic mucosal biopsy from UC responder (R) 72 week (W) 4-6 after infliximab (IFX) therapy
!Sample_geo_accession	GSM1900178	GSM1900209	GSM1900179	GSM1900203	GSM1900218	GSM1900199	GSM1900188	GSM1900149	GSM1900157	GSM1900219	GSM1900156	GSM1900183	GSM1900187	GSM1900220	GSM1900207	GSM1900177	GSM1900205	GSM1900212	GSM1900160	GSM1900190	GSM1900182	GSM1900193	GSM1900216
Unresponder	GSM1900178	GSM1900209	GSM1900179	GSM1900203	GSM1900218	GSM1900199	GSM1900188	GSM1900149	GSM1900157	GSM1900219	GSM1900156	GSM1900183	GSM1900187	GSM1900220	GSM1900207
ALKBH5	9.15978	9.11736	9.13211	9.31025	9.16535	9.24363	8.92173	9.17739	8.9532	9.00371	8.94728	9.05116	9.13213	9.10384	9.07723
IGF2BP2	7.99942	7.98394	7.82792	8.26909	7.68397	7.79414	8.0127	8.58115	8.37877	7.76042	8.39686	8.34771	8.06896	7.90992	8.07494
IGF2BP3	5.20336	5.11356	5.62241	4.89351	5.59801	5.29188	5.60617	4.88484	4.84775	5.07473	5.96131	4.61617	5.88451	4.94642	5.67519
LRPPRC	9.61721	9.2992	9.2575	9.63287	9.19166	8.94299	8.87521	9.50843	9.46486	9.24428	9.79872	9.69968	9.00173	9.07762	9.18056
RBM15B	8.13622	8.09426	7.99662	8.46223	8.03816	8.13346	8.01011	8.28192	8.21978	8.03025	8.27911	8.15794	8.03449	8.02941	8.19294
WTAP	10.7646	10.4836	10.7052	10.7163	11.0331	10.6987	10.8551	10.5496	10.4937	10.8919	10.6342	10.5697	10.6365	10.6396	10.5085
YTHDF3	8.93644	8.76192	8.85767	9.23815	8.94765	8.66744	8.97947	8.9213	8.91468	8.76374	8.91028	9.14013	9.02827	8.80081	8.69113
Responder	GSM1900177	GSM1900205	GSM1900212	GSM1900160	GSM1900190	GSM1900182	GSM1900193	GSM1900216
ALKBH5	9.1027	9.11178	9.21565	9.10984	9.03377	9.21055	9.24782	9.03519
IGF2BP2	8.47467	8.38566	8.69164	8.75601	8.40091	8.65586	8.4167	8.53636
IGF2BP3	4.74485	5.06464	4.66771	4.93021	5.42932	4.49558	4.55428	4.75306
LRPPRC	9.52351	9.51892	9.8518	9.1857	9.57988	9.95491	9.60324	9.68886
RBM15B	8.34164	8.28356	8.43904	8.19819	8.25307	8.56557	8.33851	8.35104
WTAP	10.3502	10.4882	10.7333	10.3631	10.3987	10.3747	10.3091	10.6029
YTHDF3	9.04742	8.95199	9.29919	9.13672	8.99251	9.13647	8.90484	9.05518

## Sheet: GSE92415Golimumab
Unresponder	mayo score: 8	mayo score: 8	mayo score: 11	mayo score: 9	mayo score: 6	mayo score: 8	mayo score: 8	mayo score: 7	mayo score: 10	mayo score: 11	mayo score: 10	mayo score: 9	mayo score: 8	mayo score: 9	mayo score: 12	mayo score: 11	mayo score: 8	mayo score: 8	mayo score: 10	mayo score: 8	mayo score: 7	mayo score: 12	mayo score: 8	mayo score: 10	mayo score: 10	mayo score: 7	mayo score: 8	mayo score: 4	mayo score: 7	mayo score: 10	mayo score: 9	mayo score: 7	mayo score: 8	mayo score: 7	mayo score: 8	mayo score: 10	mayo score: 7	mayo score: 6	mayo score: 9	mayo score: 7	mayo score: 9	mayo score: 4	mayo score: 6	mayo score: 8	mayo score: 8	mayo score: 9	mayo score: 8	mayo score: 10
Unresponder	GSM2429349	GSM2429350	GSM2429355	GSM2429356	GSM2429358	GSM2429359	GSM2429360	GSM2429361	GSM2429363	GSM2429364	GSM2429366	GSM2429368	GSM2429369	GSM2429370	GSM2429371	GSM2429373	GSM2429374	GSM2429377	GSM2429378	GSM2429379	GSM2429383	GSM2429384	GSM2429385	GSM2429386	GSM2429387	GSM2429388	GSM2429389	GSM2429405	GSM2429407	GSM2429410	GSM2429411	GSM2429412	GSM2429420	GSM2429423	GSM2429424	GSM2429425	GSM2429427	GSM2429428	GSM2429429	GSM2429430	GSM2429432	GSM2429434	GSM2429435	GSM2429437	GSM2429439	GSM2429440	GSM2429441	GSM2429442
HNRNPC	6.9054	6.5848	6.3294	6.1959	6.2118	6.7847	6.0102	6.2566	6.247	6.27	5.9416	5.9798	6.9466	6.7318	6.4863	6.6665	7.0259	5.4958	6.2968	6.2788	6.8877	3.8376	6.5019	5.8751	6.4095	5.9721	6.9639	7.1048	6.1148	6.9046	4.13	5.7441	6.4657	6.5241	5.9384	5.5514	5.622	5.5689	5.2804	5.8594	5.7254	6.3881	6.2532	6.7678	5.8907	5.877	7.1369	5.3373
IGF2BP1	4.8005	4.7025	5.043	5.2511	5.3042	4.9394	5.1131	4.8979	4.8736	4.9068	5.3606	5.1302	5.161	5.0532	4.9894	5.0086	5.1652	4.9946	5.4086	5.3145	4.9284	5.4976	5.0556	4.8924	5.0651	4.8515	5.0131	5.0457	4.7779	4.8036	5.3097	5.0867	4.9641	5.159	5.2878	6.0494	5.0531	5.3602	5.1456	4.9595	5.028	5.194	5.0187	4.8805	5.3009	5.1269	4.9475	5.2178
IGF2BP2	10.5316	10.4967	10.4882	10.1276	10.0557	10.5233	9.6897	9.901	9.3333	10.2814	9.8804	9.6577	10.8426	10.4963	10.2731	10.8086	10.5637	10.5878	10.3616	10.6451	9.876	9.1749	10.0754	9.7963	9.9428	10.3879	10.3467	11.0522	10.3649	9.7288	9.0346	10.5718	10.3782	10.1139	11.0715	10.3745	10.5073	10.6076	10.6999	10.6017	10.5841	10.8591	9.8773	10.3588	10.0596	10.0948	10.4054	10.2837
IGF2BP3	5.9739	5.1131	5.5242	7.1613	6.2544	6.2773	8.3863	6.5581	6.8473	6.179	6.6464	6.714	4.5877	5.0312	4.9381	6.752	5.3539	5.7342	5.8327	6.2595	8.0796	6.1533	5.6049	6.806	8.9441	5.9784	8.6447	5.3295	7.023	5.6156	6.148	4.8694	6.4744	5.3486	5.8854	6.16	6.2301	6.1295	7.3744	5.927	8.0619	5.6778	6.2131	5.8333	6.6837	6.2742	5.3663	8.6868
LRPPRC	9.8692	10.2599	9.5862	9.7371	9.5254	9.8249	9.9666	9.6972	9.0828	9.6141	9.6539	9.7047	10.0574	10.1006	10.0445	10.1148	10.5553	10.0898	10.0367	10.1084	9.3643	8.7667	10.0391	9.1363	9.4201	10.0273	9.6334	10.6512	9.1645	10.082	9.1565	10.2168	9.663	10.0642	10.7303	9.5826	10.1072	10.0039	10.0774	10.2425	9.8952	10.5916	9.3869	9.6969	9.6122	8.9458	9.8182	9.5819
WTAP	10.1853	10.4949	10.2336	10.3295	10.2647	10.2394	10.3302	10.4561	10.8122	10.5967	10.5746	10.6513	10.2226	10.5092	9.6282	10.2841	10.5453	10.4273	10.2743	10.5352	10.606	10.6057	10.2767	10.6787	10.4792	9.7874	10.4953	10.2529	11.2851	10.3318	10.7763	10.8865	10.2258	10.2703	10.2586	10.5529	10.3092	10.3715	10.6356	10.174	10.5424	10.3283	10.4926	10.3561	10.1454	10.2971	10.3502	10.6578
Responder	mayo score: 9	mayo score: 7	mayo score: 7	mayo score: 11	mayo score: 11	mayo score: 9	mayo score: 10	mayo score: 10	mayo score: 8	mayo score: 10	mayo score: 8	mayo score: 10	mayo score: 7	mayo score: 8	mayo score: 10	mayo score: 9	mayo score: 7	mayo score: 8	mayo score: 6	mayo score: 7	mayo score: 6	mayo score: 7	mayo score: 9	mayo score: 9	mayo score: 7	mayo score: 6	mayo score: 6	mayo score: 10	mayo score: 7	mayo score: 9	mayo score: 8	mayo score: 9	mayo score: 6	mayo score: 6	mayo score: 3	mayo score: 5	mayo score: 3	mayo score: 4	mayo score: 3	mayo score: 7	mayo score: 5	mayo score: 4	mayo score: 7	mayo score: 3	mayo score: 6	mayo score: 5	mayo score: 4	mayo score: 3	mayo score: 4
Responder	GSM2429346	GSM2429347	GSM2429348	GSM2429351	GSM2429352	GSM2429353	GSM2429354	GSM2429357	GSM2429362	GSM2429365	GSM2429367	GSM2429372	GSM2429375	GSM2429376	GSM2429380	GSM2429381	GSM2429382	GSM2429390	GSM2429391	GSM2429392	GSM2429393	GSM2429394	GSM2429395	GSM2429396	GSM2429397	GSM2429398	GSM2429399	GSM2429400	GSM2429401	GSM2429402	GSM2429403	GSM2429404	GSM2429406	GSM2429408	GSM2429409	GSM2429413	GSM2429414	GSM2429415	GSM2429416	GSM2429417	GSM2429418	GSM2429419	GSM2429421	GSM2429422	GSM2429426	GSM2429431	GSM2429433	GSM2429436	GSM2429438
HNRNPC	5.9116	5.7719	6.2781	5.9326	6.5466	7.0519	6.8042	6.855	6.4635	6.4048	5.8483	6.0157	6.675	7.0295	5.5108	5.9864	5.5595	6.9028	6.8606	6.3308	5.7936	7.4594	7.0282	6.6545	6.1871	6.4628	6.2026	7.1452	6.0046	5.606	5.404	6.9225	7.208	6.376	6.0539	6.8364	7.1627	6.8711	7.046	6.8734	6.1483	6.8119	7.3457	6.918	5.689	5.7955	6.249	6.1143	7.5691
IGF2BP1	5.1773	5.3274	4.8113	4.843	4.7441	5.1659	4.4043	5.0385	5.118	4.7867	5.0072	5.1168	5.2299	5.0633	5.0447	5.282	5.0813	5.0957	4.8544	4.8058	5.307	4.8728	4.8798	4.9774	5.0447	5.0569	5.081	4.9784	5.1384	4.8785	5.1575	4.9371	4.7544	4.8262	5.1845	4.8469	4.8343	4.8581	4.8653	5.1323	5.0887	5.0163	5.1386	5.0687	5.0887	4.8375	4.9675	4.7928	4.7072
IGF2BP2	10.6347	10.2076	10.9642	9.7243	10.4388	10.8831	10.2831	10.8384	10.307	9.6303	10.1554	10.2909	10.5297	10.234	10.6169	11.0259	10.8846	10.9408	10.191	10.2156	10.2977	11.0468	10.3836	10.1275	10.1746	10.0712	10.0413	10.95	10.8612	11.0533	9.1547	10.5055	10.9418	10.4091	10.8109	11.0082	10.9854	11.1678	10.7447	10.216	10.0379	10.9411	10.5087	10.9353	10.7973	10.591	10.7832	10.3036	11.227
IGF2BP3	4.9285	5.2861	5.9981	8.7818	6.4233	5.7669	7.4011	5.4555	5.7287	5.8824	5.8866	6.123	5.0197	6.8854	6.0569	5.4805	5.4482	6.4193	5.4642	5.7466	5.3823	4.822	5.2792	5.796	5.9485	6.1292	4.8482	4.6409	5.2631	5.7149	5.9931	5.5202	5.7386	6.6859	5.1256	5.082	5.1013	4.7413	4.6712	6.1621	6.0147	4.9958	5.7857	5.0819	5.7876	5.5646	5.543	7.6813	5.0251
LRPPRC	10.1293	9.8523	10.159	9.3594	9.8616	9.8344	9.4835	10.1309	9.7521	9.3642	9.7231	9.5621	10.3002	9.7243	10.24	10.0829	10.2913	9.8171	10.1689	9.7739	9.6265	10.5498	10.0616	9.6003	9.9055	9.528	10.2184	10.4708	10.3691	9.9107	9.3434	9.6573	10.239	9.6624	10.1194	10.5635	9.7829	10.5289	10.1939	9.9053	9.6749	10.2783	10.0065	10.4908	10.0027	10.2356	10.3366	9.7093	10.4969
WTAP	9.7476	9.8	10.3664	10.5626	10.3421	10.2642	10.4414	10.1573	10.1146	10.5539	10.9854	10.5958	10.4407	10.6069	10.3112	9.7225	10.072	10.2555	10.3086	10.437	9.6381	10.1043	10.1526	10.2108	9.9469	10.6963	10.4257	10.2067	10.1993	10.251	10.5602	10.312	10.1211	10.557	10.4606	10.0468	10.2288	10.0284	10.1143	10.1914	10.7295	10.4614	10.4178	10.3712	10.2167	10.2143	10.1199	10.4642	10.3247
[truncated: 12 more columns]

## Sheet: GSE112366Ustekinumab
Responder	GSM3068481	GSM3068482	GSM3068483	GSM3068484	GSM3068485	GSM3068486	GSM3068488	GSM3068489	GSM3068490	GSM3068491	GSM3068492	GSM3068493	GSM3068494	GSM3068495	GSM3068496	GSM3068497	GSM3068498	GSM3068499	GSM3068500	GSM3068501	GSM3068502	GSM3068503	GSM3068504	GSM3068505	GSM3068506	GSM3068507	GSM3068509	GSM3068510	GSM3068511	GSM3068512	GSM3068514	GSM3068516	GSM3068518	GSM3068522	GSM3068526	GSM3068528	GSM3068529	GSM3068530	GSM3068533	GSM3068534	GSM3068538	GSM3068540	GSM3068543	GSM3068544	GSM3068545	GSM3068546	GSM3068547	GSM3068548	GSM3068612
HNRNPC	5.9992	6.447	5.4767	5.6468	5.1855	4.7829	5.6613	5.8368	5.964	6.1345	5.7255	5.7952	5.8467	5.5308	6.0896	4.2724	5.9338	4.7057	5.9801	5.7309	5.4428	5.4946	5.5566	5.8917	4.924	6.0355	5.144	5.5968	5.4522	4.9447	5.0563	5.8566	5.4267	4.837	5.8152	5.6916	5.6098	5.8717	5.6061	5.4815	6.1222	4.8521	6.2908	5.8861	5.6048	5.4112	6.2006	5.2343	5.3257
WTAP	2.9414	2.9241	2.7753	2.7514	2.7387	2.8393	3.1526	2.9873	2.8949	2.8752	2.7708	2.6393	3.3265	2.7405	3.0974	3.3266	3.0424	3.4219	2.8975	2.6828	2.6228	3.7146	2.4795	2.8313	2.8433	2.9861	2.4852	3.3558	3.4573	2.619	3.449	3.0145	2.6936	2.9783	3.3182	3.0258	3.0706	2.5944	3.0727	2.7749	3.0362	2.8149	3.1733	2.7149	3.2432	2.9181	3.0644	3.5178	2.9931
ZCCHC4	4.2289	3.9902	4.1291	3.7446	3.8131	3.9967	3.4506	3.4374	3.8693	3.7115	3.9128	3.8536	3.6481	3.834	3.7339	3.6824	3.8211	4.6186	3.7398	4.1937	4.0915	4.1352	3.9105	3.6137	3.5402	3.5383	3.341	4.2982	3.7833	4.1083	3.8986	3.5214	3.1859	3.8924	3.4697	3.6206	3.4041	3.2054	3.9591	3.9236	4.0619	3.3405	3.8897	3.755	3.2531	3.5277	4.1968	3.9455	4.2824
Unresponder	GSM3068464	GSM3068465	GSM3068466	GSM3068467	GSM3068468	GSM3068469	GSM3068470	GSM3068471	GSM3068472	GSM3068473	GSM3068474	GSM3068475	GSM3068476	GSM3068477	GSM3068478	GSM3068479	GSM3068480	GSM3068487	GSM3068508	GSM3068513	GSM3068515	GSM3068517	GSM3068519	GSM3068520	GSM3068521	GSM3068523	GSM3068524	GSM3068525	GSM3068527	GSM3068531	GSM3068532	GSM3068535	GSM3068536	GSM3068537	GSM3068539	GSM3068541	GSM3068542	GSM3068549	GSM3068596	GSM3068597	GSM3068598	GSM3068599	GSM3068600	GSM3068601	GSM3068602	GSM3068603	GSM3068604	GSM3068605	GSM3068606
HNRNPC	6.0024	5.5781	5.7594	5.6437	5.1322	5.9823	6.6283	5.4342	6.2187	6.1334	5.4112	5.712	5.8511	5.8916	5.4205	5.549	5.7121	6.0926	5.7659	5.9343	6.3259	5.2576	5.683	5.6424	6.848	5.688	5.4796	5.9455	5.7182	5.5282	6.1918	6.2022	4.8989	6.4566	5.7124	6.0197	5.6852	5.8473	6.4338	6.4857	5.2376	6.0072	5.9111	3.9759	6.3451	5.4322	5.2889	6.1388	5.9745
WTAP	2.8546	3.0582	2.9058	3.2951	3.7566	4.1532	3.8112	2.9684	2.7231	2.8876	2.8992	3.2796	2.7118	2.7585	2.455	3.0498	2.968	3.3755	2.6543	3.0909	2.7795	2.8489	3.1913	3.9795	3.9609	3.0811	3.0169	3.4474	3.8551	3.2992	3.238	2.9767	2.8013	3.3076	2.6623	2.7783	3.5742	3.7805	2.8765	2.8531	3.6092	3.0956	3.7774	2.8771	2.8132	2.7694	2.805	2.6436	3.1246
ZCCHC4	4.3342	3.7816	3.9122	3.5304	3.5779	3.3584	4.1896	3.742	3.5355	3.5137	4.1713	3.7035	3.4994	3.5341	3.44	3.2226	3.9474	3.7994	3.8578	3.3655	3.7504	3.6283	3.6475	3.5195	3.5628	3.2721	4.2015	3.5649	3.4124	3.5966	3.6695	3.6367	4.0939	4.1215	3.4735	4.4846	3.1661	4.0457	3.7868	3.5313	4.0847	4.2673	4.0827	3.5223	3.6202	3.5368	3.3281	3.429	3.7089
[truncated: 84 more columns]
