# Supplementary material for: A Broad m6A Modification Landscape in Inflammatory Bowel Disease
Source: Front Cell Dev Biol. 2022 Jan 19;9:782636. doi: 10.3389/fcell.2021.782636 (PMC8809481; doi:10.3389/fcell.2021.782636)
Supplement: Supplementary file 5 [file Table1.xlsx]

## Sheet: IBD m6A SNPs
Modification Type	Chromosome Position	Source	Chr	Position	Species	Gene	Gene Type	Region	Strand	SNP ID	Variant(s)	SNP Position	Database	RBP	Splice	miRNA Targets	circRNA	GWAS	Transcriptome Regulation	Disease	Detail
m6A	chr19:17210075(+)	m6A-Label-seq (High)	chr19	17210075	Human	MYO9B	Protein coding	intron	+	Human_SNP_ID_660110009	rs2279001	chr19:17210075..17210075	dbSNP153	1	0	0	1	Inflammatory Bowel Diseases	RBP 2 circRNA 6	Inflammatory Bowel Diseases	Detail
m6A	chr11:61796828(+)	miCLIP&DART-seq (High)	chr11	61796828	Human	FADS2,FEN1	Protein coding,Protein coding	intron,3'UTR	+	Human_SNP_ID_469025476	rs4246215	chr11:61796827..61796827	dbSNP153	1	0	0	0	-	RBP 9		Detail
m6A	chr11:61796828(+)	miCLIP&DART-seq (High)	chr11	61796828	Human	FADS2,FEN1	Protein coding,Protein coding	intron,3'UTR	+	Human_SNP_ID_469025477	rs4246215	chr11:61796827..61796827	dbSNP153	1	0	0	0	-	RBP 9		Detail
m6A	chr5:35877812(+)	miCLIP (High)	chr5	35877812	Human	IL7R	Protein coding	3'UTR	+	Human_SNP_ID_227857041	rs10491434	chr5:35877812..35877812	dbSNP153,PGA	0	0	1	0	Inflammatory Bowel Diseases	miRNA 1	Inflammatory Bowel Diseases	Detail
m6A	chr19:52035027(+)	MeRIP-seq (Medium)	chr19	52035027	Human	-	Other	Unknown	+	Human_SNP_ID_669074076	rs6509616	chr19:52035025..52035025	dbSNP153	0	0	0	0	Inflammatory Bowel Diseases		Inflammatory Bowel Diseases	Detail
m6A	chr6:31660620(-)	MeRIP-seq (Medium)	chr6	31660620	Human	C6orf47	Protein coding	5'UTR	-	Human_SNP_ID_272006556	rs148844907	chr6:31660620..31660620	dbSNP153	1	0	0	0	Inflammatory Bowel Disease	RBP 4	Inflammatory Bowel Disease	Detail
m6A	chr2:9497200(+)	MeRIP-seq (Medium)	chr2	9497200	Human	-	Other	Unknown	+	Human_SNP_ID_60270680	rs56237316	chr2:9497202..9497202	dbSNP153,HGVD	0	0	0	0	-		Inflammatory skin and bowel disease, neonatal 1	Detail
m6A	chr20:6778468(+)	m6A-Label-seq&miCLIP (High)	chr20	6778468	Human	BMP2	Protein coding	CDS	+	Human_SNP_ID_672747009	rs235768	chr20:6778468..6778468	dbSNP153	1	0	0	1	Inflammatory Bowel Diseases	RBP 1 circRNA 1	Inflammatory Bowel Diseases	Detail
m6A	chr20:6778468(+)	m6A-Label-seq&miCLIP (High)	chr20	6778468	Human	BMP2	Protein coding	CDS	+	Human_SNP_ID_672747010	rs235768	chr20:6778468..6778468	dbSNP153,HGVD	1	0	0	1	Inflammatory Bowel Diseases	RBP 1 circRNA 1	Inflammatory Bowel Diseases	Detail
m6A	chr10:99526450(-)	m6A-Label-seq (High)	chr10	99526450	Human	LINC01475	lincRNA	exon	-	Human_SNP_ID_444065264	rs7917446	chr10:99526450..99526450	dbSNP153	0	1	0	0	Inflammatory Bowel Diseases; Inflammatory Bowel Disease	Splice 2	Inflammatory Bowel Diseases; Inflammatory Bowel Disease	Detail
m6A	chr8:48266349(+)	m6A-Label-seq (High)	chr8	48266349	Human	-	Other	Unknown	+	Human_SNP_ID_362202512	rs79343834	chr8:48266349..48266349	dbSNP153	0	0	0	0	Inflammatory Bowel Diseases; Inflammatory bowel disease		Inflammatory Bowel Diseases; Inflammatory bowel disease	Detail
m6A	chr11:117998953(+)	MeRIP-seq (Medium)	chr11	117998953	Human	IL10RA	Protein coding	exon	+	Human_SNP_ID_483461797	rs2229113	chr11:117998955..117998955	dbSNP153,PGA,HGVD	0	0	0	1	-	circRNA 2	Inflammatory bowel disease;not specified	Detail
m6A	chr22:28786083(-)	MeRIP-seq (Medium)	chr22	28786083	Human	-	Other	Unknown	-	Human_SNP_ID_701220150	rs17514713	chr22:28786082..28786082	dbSNP153,HGVD	0	0	0	0	Inflammatory Bowel Diseases		Inflammatory Bowel Diseases	Detail
m6A	chr1:160873655(+)	m6A-Label-seq (High)	chr1	160873655	Human	-	Other	Unknown	+	Human_SNP_ID_36097862	rs6685693	chr1:160873655..160873655	dbSNP153	0	0	0	0	Inflammatory Bowel Diseases		Inflammatory Bowel Diseases	Detail
m6A	chr9:136375695(-)	MeRIP-seq (Medium)	chr9	136375695	Human	SNAPC4	Protein coding	3'UTR	-	Human_SNP_ID_418120951	rs3088081	chr9:136375697..136375697	dbSNP153	1	0	0	1	Inflammatory Bowel Disease; Inflammatory Bowel Diseases; Inflammatory bowel disease; Inflammatory Bowel Disease	RBP 3 circRNA 6	Inflammatory Bowel Disease; Inflammatory Bowel Diseases; Inflammatory bowel disease; Inflammatory Bowel Disease	Detail
m6A	chr6:166995085(-)	miCLIP (High)	chr6	166995085	Human	Z94721.1	lincRNA	intron	-	Human_SNP_ID_305576741	rs35401781	chr6:166995084..166995084	dbSNP153	1	0	0	0	Inflammatory Bowel Disease; Inflammatory Bowel Diseases; Inflammatory bowel disease	RBP 3	Inflammatory Bowel Disease; Inflammatory Bowel Diseases; Inflammatory bowel disease	Detail
m6A	chr6:167072343(+)	m6A-Label-seq (High)	chr6	167072343	Human	Z94721.2,FGFR1OP	lincRNA,Protein coding	intron,intron	+	Human_SNP_ID_305596440	rs7762156	chr6:167072343..167072343	dbSNP153	0	0	0	0	Inflammatory Bowel Disease		Inflammatory Bowel Disease	Detail
m6A	chr16:50711405(+)	MeRIP-seq (Medium)	chr16	50711405	Human	NOD2	Protein coding	CDS	+	Human_SNP_ID_602441293	rs1361409611	chr16:50711405..50711405	dbSNP153	0	0	0	1	-	circRNA 1	Blau syndrome;Inflammatory bowel disease 1	Detail
m6A	chr16:50711405(+)	MeRIP-seq (Medium)	chr16	50711405	Human	NOD2	Protein coding	CDS	+	Human_SNP_ID_602441294	rs1361409611	chr16:50711405..50711405	dbSNP153	0	0	0	1	-	circRNA 1	Blau syndrome;Inflammatory bowel disease 1	Detail
m6A	chr21:33296372(+)	MeRIP-seq (Medium)	chr21	33296372	Human	IL10RB,AP000295.1	Protein coding,Protein coding	3'UTR,3'UTR	+	Human_SNP_ID_693570785	rs886057003	chr21:33296374..33296374	dbSNP153	1	0	0	1	-	RBP 2 circRNA 8	Inflammatory bowel disease	Detail
m6A	chr21:33296440(+)	miCLIP (High)	chr21	33296440	Human	IL10RB,AP000295.1	Protein coding,Protein coding	3'UTR,3'UTR	+	Human_SNP_ID_693570814	rs3171425	chr21:33296442..33296442	dbSNP153,PGA	1	0	0	1	-	RBP 1 circRNA 8	Inflammatory bowel disease	Detail
m6A	chr7:30452935(-)	MeRIP-seq (Medium)	chr7	30452935	Human	NOD1	Protein coding	CDS	-	Human_SNP_ID_315401799	rs2235099	chr7:30452934..30452934	dbSNP153,HGVD	0	0	0	1	Inflammatory Bowel Diseases	circRNA 6	Inflammatory Bowel Diseases	Detail
m6A	chr17:76010321(+)	MeRIP-seq (Medium)	chr17	76010321	Human	-	Other	Unknown	+	Human_SNP_ID_633018264	rs148533039	chr17:76010322..76010322	dbSNP153	0	0	0	0	Inflammatory Bowel Disease		Inflammatory Bowel Disease	Detail
m6A	chr17:76010321(+)	MeRIP-seq (Medium)	chr17	76010321	Human	-	Other	Unknown	+	Human_SNP_ID_633018265	rs148533039	chr17:76010322..76010322	dbSNP153	0	0	0	0	Inflammatory Bowel Disease		Inflammatory Bowel Disease	Detail
m6A	chr10:79280452(-)	m6A-Label-seq (High)	chr10	79280452	Human	-	Other	Unknown	-	Human_SNP_ID_439110423	rs1749855	chr10:79280452..79280452	dbSNP153	0	0	0	0	-			Detail
m6A	chr13:99255088(-)	miCLIP (High)	chr13	99255088	Human	GPR18	Protein coding	CDS	-	Human_SNP_ID_542532148	rs3742130	chr13:99255087..99255087	dbSNP153,HGVD	0	0	0	0	Inflammatory Bowel Diseases; Inflammatory bowel disease		Inflammatory Bowel Diseases; Inflammatory bowel disease	Detail
m6A	chr6:167072343(+)	m6A-Label-seq (High)	chr6	167072343	Human	Z94721.2,FGFR1OP	lincRNA,Protein coding	intron,intron	+	Human_SNP_ID_865336437	rs7762156	chr6:167072343..167072343	ICGC	0	0	0	0	Inflammatory Bowel Disease		Inflammatory Bowel Disease	Detail
m6A	chr7:30452935(-)	MeRIP-seq (Medium)	chr7	30452935	Human	NOD1	Protein coding	CDS	-	Human_SNP_ID_868886140	rs2235099	chr7:30452934..30452934	ICGC,COSMIC	0	0	0	1	Inflammatory Bowel Diseases	circRNA 6	Inflammatory Bowel Diseases	Detail
m6A	chr13:99255088(-)	miCLIP (High)	chr13	99255088	Human	GPR18	Protein coding	CDS	-	Human_SNP_ID_818255035	rs3742130	chr13:99255087..99255087	ICGC,COSMIC	0	0	0	0	Inflammatory Bowel Diseases; Inflammatory bowel disease		Inflammatory Bowel Diseases; Inflammatory bowel disease	Detail
m6A	chr8:48266349(+)	m6A-Label-seq (High)	chr8	48266349	Human	-	Other	Unknown	+	Human_SNP_ID_875286978	rs79343834	chr8:48266349..48266349	ICGC	0	0	0	0	Inflammatory Bowel Diseases; Inflammatory bowel disease		Inflammatory Bowel Diseases; Inflammatory bowel disease	Detail
m6A	chr21:33296440(+)	miCLIP (High)	chr21	33296440	Human	IL10RB,AP000295.1	Protein coding,Protein coding	3'UTR,3'UTR	+	Human_SNP_ID_843296751	rs3171425	chr21:33296442..33296442	ICGC,COSMIC	1	0	0	1	-	RBP 1 circRNA 8	Inflammatory bowel disease	Detail
m6A	chr20:6778468(+)	m6A-Label-seq&miCLIP (High)	chr20	6778468	Human	BMP2	Protein coding	CDS	+	Human_SNP_ID_842060671	rs235768	chr20:6778468..6778468	ICGC,COSMIC	1	0	0	1	Inflammatory Bowel Diseases	RBP 1 circRNA 1	Inflammatory Bowel Diseases	Detail
m6A	chr11:117998953(+)	MeRIP-seq (Medium)	chr11	117998953	Human	IL10RA	Protein coding	exon	+	Human_SNP_ID_810450317	rs2229113	chr11:117998955..117998955	ICGC,COSMIC	0	0	0	1	-	circRNA 2	Inflammatory bowel disease;not specified	Detail
m6A	chr11:61796828(+)	miCLIP&DART-seq (High)	chr11	61796828	Human	FADS2,FEN1	Protein coding,Protein coding	intron,3'UTR	+	Human_SNP_ID_810810938	rs4246215	chr11:61796827..61796827	ICGC	1	0	0	0	-	RBP 9		Detail
m6A	chr11:117989587(+)	Prediction (Low)	chr11	117989587	Human	IL10RA	Protein coding	exon	+	Human_SNP_ID_483459576	rs192749274	chr11:117989589..117989589	dbSNP153	0	1	0	0	-	Splice 6	Inflammatory bowel disease	Detail
m6A	chr11:117989587(+)	Prediction (Low)	chr11	117989587	Human	IL10RA	Protein coding	exon	+	Human_SNP_ID_483459577	rs192749274	chr11:117989589..117989589	dbSNP153	0	1	0	0	-	Splice 6	Inflammatory bowel disease	Detail
m6A	chr11:117998833(+)	Prediction (Low)	chr11	117998833	Human	IL10RA	Protein coding	exon	+	Human_SNP_ID_483461750	rs148808529	chr11:117998835..117998835	dbSNP153	0	0	0	1	-	circRNA 2	Inflammatory bowel disease;not provided	Detail
m6A	chr16:50711311(+)	Prediction (Low)	chr16	50711311	Human	NOD2	Protein coding	CDS	+	Human_SNP_ID_602441252	rs769988393	chr16:50711313..50711313	dbSNP153	0	0	0	1	-	circRNA 1	Blau syndrome;Inflammatory bowel disease 1	Detail
m6A	chr16:50711567(+)	Prediction (Low)	chr16	50711567	Human	NOD2	Protein coding	CDS	+	Human_SNP_ID_602441373	rs772534917	chr16:50711539..50711539	dbSNP153	0	0	0	1	-	circRNA 1	Blau syndrome;Inflammatory bowel disease 1	Detail
m6A	chr16:50711567(+)	Prediction (Low)	chr16	50711567	Human	NOD2	Protein coding	CDS	+	Human_SNP_ID_602441376	rs747581406	chr16:50711546..50711546	dbSNP153	0	0	0	1	Inflammatory Bowel Diseases	circRNA 1	Inflammatory Bowel Diseases	Detail
m6A	chr16:50711567(+)	Prediction (Low)	chr16	50711567	Human	NOD2	Protein coding	CDS	+	Human_SNP_ID_602441384	rs104895471	chr16:50711559..50711559	dbSNP153	0	0	0	1	-	circRNA 1	Blau syndrome;Blau syndrome;Inflammatory bowel disease 1	Detail
m6A	chr19:52014325(-)	Prediction (Low)	chr19	52014325	Human	ZNF614	Protein coding	intron	-	Human_SNP_ID_669068708	rs148406565	chr19:52014311..52014326	dbSNP153	1	0	1	0	Inflammatory Bowel Diseases	RBP 4 miRNA 1	Inflammatory Bowel Diseases	Detail
m6A	chr1:155212058(+)	Prediction (Low)	chr1	155212058	Human	MTX1	Protein coding	intron	+	Human_SNP_ID_34637946	rs2974935	chr1:155212052..155212052	dbSNP153	0	0	0	1	-	circRNA 2		Detail
m6A	chr1:67267633(-)	Prediction (Low)	chr1	67267633	Human	RNU4ATAC4P	snRNA	exon	-	Human_SNP_ID_17004133	rs57719158	chr1:67267638..67267638	dbSNP153	0	0	0	0	Inflammatory Bowel Diseases		Inflammatory Bowel Diseases	Detail
m6A	chr2:112840531(+)	Prediction (Low)	chr2	112840531	Human	AC079753.1	Other	exon	+	Human_SNP_ID_87436124	rs4848306	chr2:112840530..112840530	dbSNP153	0	0	0	0	Inflammatory Bowel Diseases		Inflammatory Bowel Diseases	Detail
m6A	chr6:31528794(+)	Prediction (Low)	chr6	31528794	Human	-	Other	Unknown	+	Human_SNP_ID_271969971	rs2516482	chr6:31528792..31528792	dbSNP153	0	0	0	0	-			Detail
m6A	chr9:5114771(+)	Prediction (Low)	chr9	5114771	Human	IGHEP2,JAK2	Pseudogene,Protein coding	exon,intron	+	Human_SNP_ID_388199611	rs17425819	chr9:5114773..5114773	dbSNP153	1	0	0	1	-	RBP 1 circRNA 12		Detail
m6A	chrX:100850205(-)	Prediction (Low)	chrX	100850205	Human	NOX1	Protein coding	CDS	-	Human_SNP_ID_726477026	rs34688635	chrX:100850206..100850206	dbSNP153	0	1	0	0	Inflammatory Bowel Diseases	Splice 4	Inflammatory Bowel Diseases	Detail

## Sheet: 163 IBD SNPs
Chr	Position (hg19 (Mb))	SNP	Key Genes (+N additional in locus)	p-value	RAF	OR
Crohn's Disease
1	78.62	rs17391694	(5)	2.959e-09	0.889	1.134
1	114.3	rs6679677§	PTPN22,DCLRE1B,(7)	2.025e-15	0.9071	1.196^
1	120.45	rs3897478	ADAM30,(5)	1.971e-11	0.891	1.161
1	172.85	rs9286879	FASLG,TNFSF18,(0)	5.525e-22	0.249	1.125
2	27.63	rs1728918	UCN,(23)	4.856e-16	0.299	1.123
2	62.55	rs10865331	(3)	9.772e-10	0.396	1.098
2	231.09	rs6716753	SP140,(5)	1.169e-16	0.196	1.134
2	234.145	rs12994997	ATG16L1, INPP5D, (7)	4.144e-70	0.523	1.233
4	48.36	rs6837335	TXK,TEC,SLC10A4,(3)	1.751e-08	0.647	1.086
4	102.86	rs13126505	(1)	1.84e-12	0.0964	1.172
5	55.43	rs10065637	IL6ST,IL31RA,(1)	3.683e-12	0.773	1.123
5	72.54	rs7702331	(4)	5.632e-10	0.621	1.088
5	173.34	rs17695092	CPEB4,(2)	4.684e-09	0.703	1.095
6	21.42	rs12663356	(3)	4.007e-12	0.533	1.095
6	31.27	rs9264942	HLA-C,PSORS1C1,NFKBIL1,MICB,(18)	4.958e-28	0.378	1.145
6	127.45	rs9491697	(3)	3.788e-10	0.439	1.077
6	128.24	rs13204742	(2)	8.382e-15	0.124	1.173
6	159.49	rs212388	TAGAP,(5)	3.037e-14	0.41	1.105
7	26.88‡	rs10486483	(2)	3.48e-08	0.247	1.089
7	28.17	rs864745	CREB5,JAZF1,(1)	3.647e-09	0.497	1.087
8	90.87	rs7015630	RIPK2,(4)	1.416e-08	0.739	1.075
8	129.56	rs6651252	(0)	1.447e-16	0.865	1.185
13	44.45	rs3764147	LACC1,(3)	2.188e-21	0.248	1.155
15	38.89	rs16967103	RASGRP1,SPRED1,(2)	3.884e-09	0.203	1.088
16	50.66**	rs2066847§	NOD2,ADCY7,(5)	5.8613e-209	0.02437	3.103^
17	25.84	rs2945412	LGALS9,NOS2,(3)	8.678e-17	0.587	1.137
19	1.12	rs2024092	GPX4,HMHA1,(20)	8.263e-22	0.215	1.156
19	46.85‡	rs4802307	(9)	1.996e-10	0.706	1.099
19	49.2	rs516246	DBP,SPHK2,IZUMO1,FUT2,(22)	1.004e-15	0.483	1.107
21	34.77	rs2284553	IFNGR2,IFNAR1,IFNAR2,IL10RB,GART,TMEM50B,(6)	2.138e-16	0.599	1.123
Ulcerative Colitis
1	2.5	rs10797432	TNFRSF14,MMEL1,PLCH2,(8)	2.624e-12	0.522	1.078
1	20.15**	rs6426833	(9)	2.392e-68	0.542	1.265
1	200.09	rs2816958	(3)	1.979e-17	0.887	1.23
2	198.65	rs1016883	RFTN2,PLCL1,(7)	2.873e-08	0.817	1.1
2	199.70*	rs17229285	(0)	1.725e-13	0.496	1.117
3	53.05	rs9847710	PRKCD,ITIH4,(8)	1.046e-08	0.416	1.064
4	103.51	rs3774959	NFKB1,MANBA,(2)	3.662e-12	0.358	1.118
5	0.59	rs11739663	SLC9A3,(8)	1.812e-08	0.76	1.071
5	134.44	rs254560	(6)	2.552e-09	0.397	1.056
6	32.595	rs6927022	HLA-DQB1,HLA-DRB1,HLA-DQA1,HLA-DRA,(12)	4.71e-133	0.535	1.444
7	2.78	rs798502	CARD11,GNA12,TTYH3,(4)	6.089e-17	0.709	1.127
7	27.22‡	rs4722672	(14)	2.061e-08	0.183	1.091
7	107.45*	rs4380874	DLD,(9)	2.065e-26	0.405	1.137
7	128.57	rs4728142	IRF5,TNPO3,TSPAN33,(11)	4.371e-14	0.444	1.104
11	96.02	rs483905	JRKL,MAML2,(2)	1.205e-08	0.292	1.056
11	114.38	rs561722	FAM55A,FAM55D,(5)	5.147e-17	0.663	1.12
15	41.55	rs28374715	ITPKA,NDUFAF1,NUSAP1,(8)	2.433e-08	0.738	1.082
16	30.47	rs11150589	ITGAL,(20)	6.037e-10	0.463	1.09
16	68.58	rs1728785	ZFP90,(6)	3.71e-08	0.767	1.075
17	70.64	rs7210086	(3)	1.886e-09	0.797	1.111
19	47.12‡	rs1126510	CALM3,(14)	1.55e-09	0.363	1.075
20	33.8	rs6088765	PROCR,UQCC,CEP250,(8)	2.206e-08	0.437	1.079
20	43.06	rs6017342	ADA,HNF4A,(9)	1.431e-43	0.53	1.228
Inflammatory Bowel Disease
1	1.24	rs12103	TNFRSF18,TNFRSF4,(30)	7.661e-13	0.182	1.099
1	8.02	rs35675666	TNFRSF9,(6)	1.123e-15	0.838	1.112
1	22.7	rs12568930†	(3)	1.26e-17	0.821	1.095
1	67.68**	rs11209026†	IL23R,IL12RB2,(4)	8.12e-161	0.933	2.013
1	70.99	rs2651244†	(3)	2.291e-08	0.599	1.015
1	151.79	rs4845604†	RORC,(14)	3.524e-16	0.857	1.144
1	155.67	rs670523†	UBQLN4,RIT1,MSTO1,(28)	5.79e-11	0.324	1.06
1	160.85	rs4656958†	CD48,SLAMF1,ITLN1,CD244,F11R,USF1,SLAMF7,ARHGAP30,(8)	6.799e-09	0.686	1.061
1	161.47	rs1801274†	FCGR2A,FCGR2B,FCGR3A,HSPA6,FCGR3B,FCRLA,(9)	2.121e-38	0.509	1.124
1	197.6	rs2488389	C1orf53,(2)	8.454e-13	0.22	1.115
1	200.87	rs7554511	KIF21B,(6)	1.242e-32	0.725	1.164
1	206.93	rs3024505†	IL10,IL20,IL19,IL24,PIGR,MAPKAPK2,FAIM3,RASSF5,(3)	6.664e-42	0.16	1.208
2	25.12	rs6545800†	ADCY3,(6)	6.14e-16	0.445	1.109
2	28.61	rs925255†	FOSL2,BRE,(1)	2.67e-15	0.557	1.092
2	43.81	rs10495903†	(5)	8.027e-12	0.13	1.086
2	61.2	rs7608910	REL,C2orf74,KIAA1841,AHSA2,(6)	8.654e-32	0.394	1.138
2	65.67	rs6740462	SPRED2,(1)	2.351e-08	0.739	1.081
2	102.86*	rs917997†	IL1R2,IL18RAP,IL18R1,IL1R1,IL1RL1,IL1RL2,(3)	3.124e-20	0.231	1.103
2	163.1	rs2111485	IFIH1,(5)	1.931e-08	0.404	1.066
2	191.92	rs1517352	STAT1,STAT4,(2)	3.282e-11	0.6	1.077
2	219.14	rs2382817	SLC11A1,CXCR2,CXCR1,PNKD,ARPC2,TMBIM1,CTDSP1,(8)	3.704e-12	0.408	1.073
2	241.57*	rs3749171†	GPR35,(12)	3.069e-21	0.167	1.135
3	18.76	rs4256159†	(0)	9.003e-15	0.14	1.107
3	48.96**	rs3197999	MST1,PFKFB4,MST1R,UCN2,GPX1,IP6K2,BSN,IP6K1,USP4,(56)	1.007e-47	0.296	1.18
4	74.85	rs2472649†	CXCL5,CXCL1,CXCL3,IL8,CXCL6,PF4,CXCL2,PF4V1,(3)	2.572e-08	0.824	1.095
4	123.22	rs7657746	IL2,IL21,(2)	2.757e-13	0.753	1.116
5	10.69	rs2930047	DAP,(2)	1.027e-08	0.382	1.065
5	40.38**	rs11742570†	PTGER4,(1)	1.808e-82	0.605	1.198
5	96.24	rs1363907	ERAP2,ERAP1,LNPEP,(2)	5.615e-13	0.411	1.068
5	130.005	rs4836519†	(1)	4.238e-10	0.768	1.072
5	131.19*	rs2188962†	IRF1,IL13,CSF2,SLC22A4,IL4,IL3,IL5,PDLIM4,SLC22A5,ACSL6,(8)	1.347e-52	0.425	1.158
5	141.51	rs6863411†	SPRY4,NDFIP1,(5)	3.588e-14	0.63	1.089
5	150.27	rs11741861†	TNIP1,IRGM,ZNF300P1,(8)	2.941e-37	0.093	1.249
5	158.8**	rs6871626†	IL12B,(3)	1.434e-42	0.337	1.181
5	176.79	rs12654812	DOK3,(17)	1.676e-08	0.335	1.068
6	14.71	rs17119	(0)	3.075e-11	0.786	1.071
6	20.77*	rs9358372†	(2)	8.664e-14	0.379	1.089
6	90.96	rs1847472	(1)	1.573e-10	0.655	1.06
6	106.43	rs6568421†	(2)	8.236e-20	0.301	1.108
6	111.82	rs3851228	TRAF3IP2,FYN,REV3L,(2)	1.077e-13	0.073	1.153
6	138	rs6920220†	TNFAIP3,(1)	1.4e-21	0.206	1.102
6	143.9	rs12199775	PHACTR2,(5)	1.99e-08	0.929	1.129
6	167.37	rs1819333†	CCR6,RPS6KA2,RNASET2,(3)	6.76e-21	0.523	1.081
7	50.245*	rs1456896	ZPBP,IKZF1,(4)	7.275e-15	0.688	1.088
7	98.75	rs9297145	SMURF1,(6)	8.208e-12	0.265	1.082
7	100.335	rs1734907†	EPO,(21)	1.673e-13	0.149	1.114
7	116.89	rs38904†	(6)	1.311e-08	0.532	1.054
8	126.53	rs921720†	TRIB1,(1)	8.304e-20	0.609	1.081
8	130.62	rs1991866	(2)	1.647e-09	0.422	1.054
9	4.98	rs10758669	JAK2,(4)	7.881e-45	0.349	1.174
9	93.92	rs4743820†	NFIL3,(2)	3.602e-09	0.702	1.056
9	117.60**	rs4246905	TNFSF8,TNFSF15,TNC,(2)	2.804e-32	0.709	1.142
9	139.32*	rs10781499†	CARD9,PMPCA,SDCCAG3,INPP5E,(19)	4.38e-56	0.412	1.188
10	6.08	rs12722515†	IL2RA,IL15RA,(6)	3.756e-10	0.849	1.102
10	30.72	rs1042058†	MAP3K8,(3)	5.933e-11	0.592	1.075
10	35.295	rs11010067†	CREM,(3)	2.493e-25	0.346	1.115
10	59.99	rs2790216	CISD1,IPMK,(2)	8.068e-09	0.778	1.066
10	64.51**	rs10761659†	(3)	6.369e-46	0.543	1.166
10	75.67	rs2227564†	(13)	6.752e-10	0.77	1.082
10	81.03	rs1250546†	(5)	3.146e-18	0.604	1.096
10	82.25	rs6586030†	TSPAN14,C10orf58,(4)	9.242e-16	0.847	1.115
10	94.43	rs7911264	(4)	2.983e-08	0.519	1.066
10	101.28	rs4409764	NKX2-3,(6)	1.029e-54	0.491	1.182
11	1.87	rs907611	TNNI2,LSP1,(17)	2.699e-10	0.315	1.068
11	58.33	rs10896794	CNTF,LPXN,(8)	6.796e-10	0.762	1.08
11	60.77	rs11230563	CD6,CD5,PTGDR2,(12)	9.033e-13	0.654	1.085
11	61.56	rs4246215†	C11orf9,FADS1,FADS2,(12)	1.925e-15	0.338	1.079
11	64.12	rs559928	CCDC88B,RPS6KA4,TRPT1,FLRT1,(20)	4.187e-11	0.821	1.101
11	65.65	rs2231884†	RELA,FOSL1,CTSW,SNX32,(22)	2.907e-10	0.157	1.083
11	76.29	rs2155219†	(5)	4.236e-36	0.509	1.151
11	87.12	rs6592362	(1)	2.324e-08	0.248	1.083
11	118.74	rs630923†	CXCR5,(17)	7.071e-09	0.846	1.074
12	12.65	rs11612508†	LOH12CR1,(8)	1.062e-08	0.267	1.058
12	40.77*	rs11564258†	LRRK2,MUC19	6.38e-29	0.0252	1.334
12	48.2	rs11168249†	VDR,(8)	7.781e-09	0.467	1.054
12	68.49	rs7134599†	IFNG,IL26,IL22,(1)	8.506e-32	0.378	1.096
13	27.52	rs17085007†	(2)	2.788e-19	0.183	1.106
13	40.86**	rs941823†	(3)	2.07e-14	0.758	1.071
13	99.95	rs9557195	GPR183,GPR18,(6)	2.367e-14	0.772	1.112
14	69.27	rs194749†	ZFP36L1,(4)	2.699e-10	0.226	1.075
14	75.7	rs4899554†	FOS,MLH3,(6)	2.711e-08	0.819	1.083
14	88.47	rs8005161	GPR65,GALC,(1)	2.349e-14	0.0887	1.153
15	67.43	rs17293632†	SMAD3,(2)	5.968e-16	0.235	1.067
15	91.17	rs7495132	CRTC3,(3)	9.481e-11	0.891	1.134
16	11.54*	rs529866†	SOCS1,LITAF,RMI2,(10)	1.73e-16	0.803	1.124
16	23.86	rs7404095	PRKCB,(5)	9.679e-10	0.572	1.06
16	28.595	rs26528†	RABEP2,IL27,EIF3C,SULT1A1,SULT1A2,NUPR1,(9)	9.654e-22	0.451	1.099
16	86	rs10521318†	IRF8,(4)	1.408e-09	0.9154	1.155
17	32.59	rs3091316†	CCL13,CCL2,CCL11,(4)	1.224e-26	0.722	1.122
17	37.91	rs12946510	IKZF3,ZPBP2,GSDMB,ORMDL3,GSDMA,(12)	4.101e-38	0.465	1.157
17	40.53	rs12942547†	STAT3,STAT5B,STAT5A,(13)	5.506e-22	0.58	1.103
17	57.96	rs1292053†	TUBD1,RPS6KB1,(9)	8.846e-13	0.446	1.076
18	12.8	rs1893217†	(6)	3.045e-26	0.157	1.171
18	46.39	rs7240004†	SMAD7,(2)	1.309e-09	0.616	1.057
18	67.53	rs727088	CD226,(2)	4.649e-09	0.484	1.077
19	10.49*	rs11879191	TYK2,PPAN-P2RY11,ICAM1,(25)	2.036e-18	0.797	1.136
19	33.73	rs17694108	CEBPG,(8)	5.846e-15	0.282	1.1
19	55.38	rs11672983	NLRP7,NLRP2,KIR2DL1,LILRB4,(15)	6.497e-11	0.392	1.087
20	30.75	rs6142618†	HCK,(10)	6.053e-10	0.564	1.072
20	31.37	rs4911259	DNMT3B,(8)	1.198e-09	0.383	1.075
20	44.74	rs1569723†	CD40,MMP9,PLTP,(11)	9.949e-14	0.259	1.091
20	48.95	rs913678	CEBPB,(5)	4.592e-08	0.662	1.056
20	57.82	rs259964	ZNF831,CTSZ,(5)	1.013e-12	0.464	1.085
20	62.34	rs6062504	TNFRSF6B,LIME1,SLC2A4RG,ZGPAT,(23)	1.092e-23	0.684	1.104
21	16.81	rs2823286†	(0)	9.277e-30	0.708	1.157
21	40.46	rs2836878†	(3)	4.619e-48	0.733	1.18
21	45.62	rs7282490	ICOSLG,(9)	2.348e-26	0.391	1.105
22	21.92	rs2266959	MAPK1,YDJC,UBE2L3,RIMBP3,CCDC116,(8)	1.393e-16	0.186	1.105
22	30.425	rs2412970	LIF,OSM,MTMR3,(8)	2.7e-14	0.457	1.08
22	39.69*	rs2413583†	ATF4,TAB1,APOBEC3G,(16)	4.404e-33	0.833	1.209
The position given is the middle of the locus window
* = additional genome-wide significant associated SNP in the region
** = two or more additional genome-wide significant SNPs in the region
‡ = These regions have overlapping but distinct UC and CD signals
Bolded rs numbers indicate SNPs with p-values less than 10-13
† = heterogeneity of odds ratios
§ = CD risk allele is significantly protective in UC
Listed are genes implicated by one or more candidate genes approaches. Bolded genes have been implicated by two or more candidate gene approaches. For each locus, the top two candidate genes are listed. A complete listing of gene prioritization is provided in Supplementary Table 2
‖gene for which functional studies of associated alleles have been reported
Newly discovered loci

## Sheet: Discovery IBD cohorts diff m6As
Name	GSE10616	GSE126124	GSE73661	GSE75214
LRPPRC	0	1	1	1
YTHDF3	0	1	1	1
EIF3H	0	1	1	0
IGF2BP2	1	1	1	1
METTL14	0	1	1	1
ZCCHC4	1	1	1	1
YTHDC1	1	1	0	0
YTHDC2	0	1	0	0
ELAVL1	1	1	0	0
HNRNPA2B1	0	1	1	1
ALKBH1	0	1	1	1
KIAA1429	0	1	0	0
RBM15	1	1	1	0
EIF3D	0	1	1	0
FTO	0	1	0	0
EIF3A	1	1	1	1
ALKBH5	0	1	0	0
ZC3H13	1	1	0	0
EIF3I	1	1	1	1
YTHDF2	0	1	1	1
EIF3G	0	1	0	0
RBM15B	0	1	0	0
IGF2BP1	0	0	0	1
WTAP	1	0	0	1
FMR1	0	0	1	1
EIF3B	0	0	1	1
PRRC2A	0	0	1	1
IGF2BP3	0	0	1	1
METTL3	0	0	0	0
YTHDF1	0	0	1	1
CBLL1	0	0	0	1
HNRNPC	1	0	0	0

## Sheet: Validatory IBDMDB diff m6A data
id	type	ALKBH1	IGF2BP2	ZCCHC4	EIF3I	EIF3A	HNRNPA2B1
CSM5FZ38	control	9.19611	10.9827	8.53442	12.4031	13.025	15.202
CSM5FZ39	control	8.96737	11.4469	8.60876	12.7503	13.49	15.5737
HSM5FZAV	control	8.91191	11.3641	8.44158	12.6139	13.5131	15.2012
HSM5FZAW	control	8.97765	10.7639	8.24036	12.4807	13.5052	15.2974
HSM5FZAX	control	9.0212	11.1217	8.76635	12.2979	13.5682	15.4154
HSM5FZB4	control	9.45508	11.4651	8.85859	12.7664	13.7238	15.2376
HSM5FZB5	control	8.87076	11.2861	8.60627	12.5547	13.5673	15.2069
HSM5FZBD	control	8.82266	11.2065	8.61079	12.5314	13.514	15.2067
HSM5FZBE	control	9.10493	11.5124	8.82055	12.522	13.5926	15.1747
HSM5FZBH	control	8.87502	11.2222	8.39292	13.3334	13.6126	15.3357
HSM5FZBI	control	9.11164	10.4458	8.77684	12.2991	13.2943	15.1754
HSM6S4FN	control	8.91739	10.885	8.43287	12.4136	13.4897	15.1025
HSM6S4FO	control	8.73206	10.829	8.4642	12.5152	13.6332	15.1299
HSM6S4FP	control	9.06535	11.7975	8.15245	12.9008	13.4483	15.1935
HSM6S4FY	control	9.19649	11.2996	8.65263	12.6411	13.5851	15.4853
HSM6S4FZ	control	8.91932	10.8582	8.38779	12.6005	13.555	15.0091
HSM6S4G1	control	8.83828	11.4773	8.35894	12.6625	13.5987	15.1727
HSM6S4G2	control	9.25046	10.1111	8.68901	12.8634	13.7875	15.9712
HSM6S4G3	control	8.98259	10.7088	8.24973	12.9488	13.6673	15.4273
HSM6S4G4	control	8.75539	11.0971	8.16643	12.5342	13.2156	15.2398
HSM6S4G5	control	9.02243	11.0442	8.45119	12.563	13.6513	15.3933
HSM6S4G6	control	9.13524	10.0891	8.54596	12.3668	13.3003	15.3834
HSM6S4G7	control	9.14079	11.1312	8.39061	12.5741	13.6853	15.5191
HSM6S4GM	control	9.80325	11.7703	9.04507	12.7092	13.483	15.47
HSM6S4GN	control	8.82628	11.3462	8.61711	12.4795	13.5929	15.1046
HSM9UBMS	control	9.14288	10.2117	8.5704	12.3474	13.4601	15.5887
HSM9UBMT	control	8.96194	10.8356	8.50001	12.3891	13.5744	15.0311
HSM9UBMU	control	8.89262	11.2834	8.64134	12.5437	13.6067	15.1959
MSM5LWJN	control	9.3712	11.5458	8.89803	12.5358	13.5923	15.2356
MSM5LWJO	control	8.92443	11.6522	8.68499	12.8232	13.6979	15.2946
MSM5LWJS	control	8.93883	11.648	8.50891	12.6186	13.7054	14.9467
MSM5LWJT	control	9.19922	10.6865	8.65936	12.5033	13.5246	15.1689
MSM5LWJU	control	8.88076	11.3854	8.22509	13.0308	12.728	15.2099
MSM5LWJV	control	9.17906	11.3885	8.73808	12.4073	13.6308	15.2104
MSM5LWKF	control	8.75389	11.3363	8.55157	12.5186	13.6412	15.1759
MSM5LWKG	control	8.91646	10.9414	8.56366	12.4843	13.6454	15.1335
MSM719M5	control	9.36276	11.3994	8.6416	12.5219	13.8172	15.1572
MSM719M6	control	8.91372	11.3602	8.58036	12.6083	13.7615	14.9805
MSM719MA	control	9.01394	11.3117	8.68743	12.7214	13.6582	15.2727
MSM719MR	control	8.85527	11.8211	8.60532	12.61	13.7397	15.2285
MSM719MU	control	9.19781	11.3876	8.57618	12.596	13.5402	15.3407
MSM719NA	control	8.86015	11.6608	8.65463	12.5847	13.8592	15.2788
MSM719NO	control	9.02449	11.652	8.60058	12.6855	13.5105	15.3074
MSM719NP	control	9.0336	10.3308	8.79705	12.5798	13.5898	15.6119
PSM6XBZW	control	9.13094	11.2733	8.94399	12.4272	13.6881	15.3869
PSM6XBZX	control	8.89276	11.6898	8.4321	13.6096	13.5627	15.7026
PSM6XC12	control	8.89025	11.4061	8.47733	13.0213	13.8643	15.8224
PSM6XC13	control	8.87939	10.4466	8.94635	12.2668	13.4745	15.2607
PSM6XC14	control	8.66998	11.0108	8.5822	13.1584	13.4824	15.6917
CSM5FZ1F	ibd	9.05133	11.1605	8.44152	13.3208	13.8256	15.7241
CSM5FZ1G	ibd	8.89895	11.1611	8.15983	12.9621	13.8506	15.5313
CSM5FZ1H	ibd	8.87761	10.9534	8.46551	13.0575	13.8067	15.5565
CSM5FZ1I	ibd	8.68865	11.0215	8.14516	12.807	13.5456	15.2046
CSM5FZ1J	ibd	9.32005	11.4365	8.8919	12.708	13.8067	15.4283
CSM5FZ1K	ibd	8.94268	11.9523	8.21221	12.9079	13.6883	15.5412
CSM5FZ1L	ibd	8.8393	11.0193	8.61535	13.1735	13.9013	15.8249
CSM5FZ1M	ibd	9.1158	11.4281	9.07133	12.5731	13.7748	15.3212
CSM5FZ1N	ibd	8.74374	11.0234	8.53059	12.7433	13.7997	15.3451
CSM5FZ1O	ibd	8.82805	10.7351	8.72167	12.894	13.6602	15.3027
CSM5FZ1Q	ibd	9.11385	11.1616	8.58896	12.4826	13.5088	15.3469
CSM5FZ1R	ibd	9.12221	11.6384	8.09172	13.7359	14.1547	15.6832
CSM5FZ1S	ibd	8.9602	11.3867	8.56832	13.621	14.1469	15.892
CSM5FZ1T	ibd	9.23009	10.6808	8.53246	12.4738	13.7883	15.2801
CSM5FZ1U	ibd	8.81932	10.3386	8.24649	13.165	13.722	15.1847
CSM5FZ1V	ibd	8.83656	10.8233	8.32971	13.0355	13.7359	15.2682
CSM5FZ1W	ibd	8.83007	10.9959	8.57123	12.6704	13.767	15.2652
CSM5FZ22	ibd	9.40048	11.57	8.69566	12.3562	13.5912	15.127
CSM5FZ23	ibd	8.8946	11.0825	8.43714	12.6164	13.6053	15.14
CSM5FZ24	ibd	8.95273	11.5349	8.49963	12.8964	13.5303	15.4733
CSM5FZ27	ibd	9.40539	11.3512	8.81768	12.5926	13.6314	15.3729
CSM5FZ28	ibd	8.86654	11.358	8.41667	12.6768	13.637	15.2689
CSM5FZ29	ibd	9.10953	11.1342	8.54608	12.7895	13.8655	15.4039
CSM5FZ2A	ibd	9.21595	11.2527	8.77739	12.3211	13.4904	15.3904
CSM5FZ2B	ibd	8.82652	10.7006	8.49953	12.5728	13.4211	15.005
CSM5FZ2C	ibd	8.87892	10.8201	8.37426	12.7194	13.7423	15.154
CSM5FZ2D	ibd	8.97521	10.978	8.80174	12.5329	13.8592	15.4442
CSM5FZ2E	ibd	8.96073	11.4154	8.66892	12.5088	13.3233	15.1536
CSM5FZ2F	ibd	9.11447	11.2549	8.36911	12.7631	13.6629	15.2967
CSM5FZ2G	ibd	8.88373	9.96033	8.66702	12.4154	13.3423	15.5325
CSM5FZ2H	ibd	8.79159	9.67887	8.22672	12.9438	13.5578	15.4834
CSM5FZ2I	ibd	8.90376	10.8426	7.79069	12.6281	13.186	15.044
CSM5FZ2L	ibd	9.30846	11.4288	9.13782	12.3806	13.5771	15.3357
CSM5FZ2M	ibd	8.81966	10.8004	8.54532	13.1828	13.6797	15.6626
CSM5FZ2N	ibd	8.89025	10.9706	8.62067	12.7424	13.9062	15.5119
CSM5FZ2O	ibd	9.22886	11.4909	8.84562	12.4002	13.6924	15.4549
CSM5FZ2P	ibd	8.6192	10.1679	8.06835	12.818	13.658	15.2839
CSM5FZ2Q	ibd	8.78993	11.3174	8.10138	12.715	13.7216	15.4709
CSM5FZ2R	ibd	9.08764	11.1829	8.87455	12.5045	13.6757	15.4166
CSM5FZ2S	ibd	9.06349	11.2959	8.48228	12.8709	13.6716	15.5505
CSM5FZ2T	ibd	9.02382	11.3279	8.346	12.6704	13.6752	15.4082
CSM5FZ34	ibd	9.19143	11.0553	8.62091	12.6361	13.6979	15.4785
CSM5FZ35	ibd	8.76999	10.5897	8.19071	13.0355	13.5036	15.3662
CSM5FZ36	ibd	8.83729	10.1441	7.97086	13.3302	13.1441	15.0059
CSM5FZ37	ibd	8.91897	10.8073	8.15195	12.6872	13.4568	15.4374
CSM5FZ3A	ibd	8.72633	10.6255	8.34463	12.6907	13.118	15.7626
CSM5FZ3B	ibd	8.99132	10.9835	8.5027	12.4537	12.9976	15.3013
CSM5FZ3C	ibd	8.5536	11.0142	8.3603	12.923	13.2233	15.6243
CSMDRVXF	ibd	8.99166	11.0498	8.53384	12.402	13.2635	15.4087
CSMDRVXG	ibd	8.7685	10.9067	8.43343	13.0275	13.1631	15.7384
CSMDRVXH	ibd	8.88292	10.3921	8.57536	12.9392	13.2589	15.487
CSMDRVXJ	ibd	8.41922	11.0701	8.44895	12.8443	13.3679	15.7756
CSMDRVXK	ibd	9.0669	11.195	8.74453	12.5982	13.2225	15.4183
CSMDRVXL	ibd	8.81948	10.9678	7.9011	13.3966	13.281	15.6301
CSMDRVXM	ibd	8.69292	10.0846	8.38756	12.896	13.1144	15.4178
CSMDRVXN	ibd	9.0225	11.0788	8.02172	13.471	13.2881	15.7553
CSMDRVXO	ibd	8.72197	10.7	8.31144	12.574	13.2888	15.4083
CSMDRVXP	ibd	9.1712	11.0444	8.56659	12.4842	13.1052	15.2016
CSMDRVXR	ibd	8.72726	10.6476	8.184	12.8884	13.2151	15.4649
CSMDRVXS	ibd	8.97413	10.5708	8.68498	12.4633	13.2146	15.4859
CSMDRVXT	ibd	8.89469	10.7831	8.24818	12.9472	13.2127	15.8345
CSMDRVXU	ibd	8.56572	11.0354	8.25326	12.9367	13.2073	15.7123
CSMDRVXX	ibd	9.15518	11.0923	8.75152	12.6715	13.2514	15.4052
CSMDRVXY	ibd	9.09723	11.2132	8.39639	12.4141	13.7486	15.3629
CSMDRVXZ	ibd	8.83373	10.7243	8.26069	13.2469	13.9649	15.3977
CSMDRVY1	ibd	8.9736	10.7406	8.53792	12.3947	13.9881	15.2932
CSMDRVY2	ibd	8.83491	10.9966	8.42567	12.3509	13.7638	15.3054
CSMDRVY3	ibd	9.06247	11.0165	8.42541	12.6619	13.9193	15.3209
CSMDRVY4	ibd	9.25178	11.426	8.53243	13.0258	13.8869	15.6883
CSMDRVY5	ibd	9.14858	11.0536	8.90398	12.4364	13.6796	15.2685
CSMDRVY6	ibd	8.77209	11.0672	8.66259	13.1389	13.9578	15.8112
CSMDRVY7	ibd	8.82302	11.2091	8.42224	12.7242	13.7327	15.3508
CSMDTZ4X	ibd	8.99826	11.4133	8.54593	13.2126	13.7748	15.475
CSMDTZ4Y	ibd	9.10973	11.1396	8.8433	13.4558	14.0693	15.8921
ESM5GEY7	ibd	8.87386	11.4167	8.55599	12.855	13.5309	15.2823
ESM5GEY8	ibd	8.70719	9.99302	8.31502	12.8245	13.7109	15.4431
ESM5GEY9	ibd	8.79156	11.1987	8.56774	12.512	13.4721	15.2424
ESM5GEYA	ibd	8.75797	11.2683	8.4155	12.6092	13.3797	15.1704
ESM5GEYB	ibd	8.80232	9.86907	8.47693	12.3543	13.3573	15.3592
ESM5GEYI	ibd	8.28133	10.055	7.63044	13.3474	12.0859	14.8789
ESM5GEYK	ibd	8.43608	10.7841	8.46201	12.7197	13.4703	15.8045
ESM5GEYL	ibd	8.43938	10.8068	8.29807	12.6617	13.7155	15.1988
ESM6ZK8Z	ibd	8.98407	10.344	8.41706	13.0616	13.9886	15.7646
HSM5FZAE	ibd	8.95713	9.1877	8.64631	12.3431	13.678	15.1535
HSM5FZAH	ibd	8.94585	9.7599	8.74047	12.6736	13.5052	15.4329
HSM5FZAM	ibd	8.8251	11.1167	8.56141	12.7143	13.759	15.5489
HSM5FZAN	ibd	9.03511	11.8352	8.24647	13.117	13.4192	15.3588
HSM5FZAQ	ibd	8.88497	10.1856	8.62081	12.4943	13.3896	15.2234
HSM5FZAR	ibd	9.1081	11.0085	8.35299	13.4771	13.4575	15.6718
HSM5FZAS	ibd	8.92147	11.1257	8.27333	12.9912	13.6793	15.4381
HSM5FZAT	ibd	8.59844	10.6205	8.63861	12.898	13.8476	15.6177
HSM5FZAU	ibd	8.77523	10.4116	8.49345	12.8619	13.7392	15.5752
HSM5FZAY	ibd	8.93648	11.0355	8.85767	12.2449	13.6313	15.3216
HSM5FZB1	ibd	8.82713	10.3994	8.38666	12.8806	13.2752	15.4326
HSM5FZB2	ibd	8.77139	11.047	8.36666	12.5697	13.4294	15.1466
HSM5FZB3	ibd	8.93192	9.94837	8.50179	12.821	13.7086	15.5234
HSM5FZBB	ibd	8.96325	10.7311	8.70498	12.9324	13.8783	15.4476
HSM5FZBC	ibd	9.45638	11.753	8.90346	12.8694	13.9392	15.2639
HSM5FZBF	ibd	8.7234	10.2683	8.46784	12.8967	13.616	15.5246
HSM5FZBG	ibd	8.82542	11.4315	8.70597	12.8111	13.5143	15.3087
HSM6S4FQ	ibd	9.04704	10.6398	8.57744	12.4801	13.2636	15.3342
HSM6S4FR	ibd	9.01262	10.9132	8.33986	12.4605	13.8041	15.2648
HSM6S4FS	ibd	8.77593	10.4947	8.4624	13.3073	13.7393	16.0052
HSM6S4FT	ibd	8.90214	10.9272	8.43652	12.6391	13.5085	15.3801
HSM6S4FU	ibd	9.0823	11.9958	8.64329	12.454	13.4266	15.1799
HSM6S4GB	ibd	9.1047	11.2099	8.686	12.2644	13.5642	15.1537
HSM6S4GC	ibd	8.95684	11.6821	8.83556	12.8592	13.578	15.18
HSM6S4GG	ibd	8.99851	10.9399	8.64938	12.5195	13.4335	15.2934
HSM6S4GH	ibd	8.9243	9.96309	8.45231	12.7797	13.6231	15.4926
HSM6S4GI	ibd	8.69192	11.8369	8.48814	12.5994	13.4949	15.3507
HSM6S4GJ	ibd	8.81186	8.65995	8.61182	12.3088	13.5961	15.2444
HSM6S4GK	ibd	9.10035	11.2321	8.39282	12.7851	13.948	15.3519
HSM6S4GL	ibd	9.00503	11.3537	8.4389	12.4713	13.5052	15.1781
HSM6S4GO	ibd	8.76673	10.7558	8.76673	12.2184	13.4853	15.3777
HSM6S4GP	ibd	8.90318	10.909	8.63177	12.4704	13.6511	15.301
HSM6S4GQ	ibd	8.83159	10.8553	8.34296	12.754	13.4396	15.4887
HSM7H3WH	ibd	8.94897	11.5403	8.44658	12.6508	13.4707	15.3892
HSM7H3WJ	ibd	8.75407	10.5575	8.66662	12.2541	13.4847	15.2846
HSM7H3WK	ibd	8.92082	10.9905	8.71924	12.6272	13.5603	15.257
HSM7H3WL	ibd	9.0535	11.6352	8.33574	12.4196	12.9664	15.2384
HSM7H3WM	ibd	9.01122	10.3297	8.62384	13.1769	13.5838	15.8357
HSM7H3WN	ibd	8.84139	10.3587	8.4909	12.554	13.483	15.4135
HSM7H3WO	ibd	9.08656	11.1485	8.38548	12.8303	13.6368	15.5201
HSM7H3WP	ibd	8.79349	11.7556	8.3405	12.6061	13.5023	15.2116
HSM7H3WQ	ibd	8.91617	10.9669	8.374	12.5783	13.6748	15.1999
HSM7H3WR	ibd	9.06408	10.6931	8.55597	12.6803	13.5901	15.4685
HSM7H3WS	ibd	9.03755	11.1902	8.36094	12.5534	13.7121	15.1294
HSM7H3WW	ibd	9.1331	11.1296	8.51484	12.2942	13.1941	15.1928
HSM7H3WX	ibd	8.83894	10.2782	8.37633	12.9202	13.685	15.5876
HSM7H3WY	ibd	8.93931	11.5277	7.94986	13.1257	13.5796	15.477
HSM9JBU	ibd	8.9573	11.8242	8.65676	12.4928	13.4006	15.4122
HSM9JBV	ibd	8.95802	10.5953	8.55099	12.5191	13.5139	15.3678
HSM9JBW	ibd	8.71301	10.373	8.24468	12.5579	13.6574	15.3489
HSM9JTBY	ibd	8.83747	10.5654	8.30484	12.5157	13.5221	15.0123
HSM9JTBZ	ibd	9.11216	11.4059	9.02734	12.5299	13.5697	15.4536
HSM9JTC1	ibd	9.27381	10.9763	8.81228	12.5362	13.4732	15.3519
HSM9JTC2	ibd	9.07171	11.1584	8.42217	12.7122	13.7968	15.2252
HSM9JTC3	ibd	8.82527	11.8383	8.45857	12.5633	13.5974	15.1086
HSM9JTC7	ibd	8.76866	10.863	8.55138	12.3552	13.3693	15.0129
HSM9JTC8	ibd	8.85402	10.8759	8.27006	13.1975	13.6006	15.3663
HSM9UBMN	ibd	8.89814	11.0291	8.49187	12.4756	13.5726	15.4029
HSM9UBMO	ibd	8.87026	10.7361	7.98879	12.7133	13.6331	15.3721
HSM9UBMP	ibd	8.58233	11.3726	8.40064	12.4974	13.5599	15.0201
HSM9UBMQ	ibd	8.79331	10.9098	8.39693	12.6462	13.5834	15.3199
HSM9UBMR	ibd	9.07315	11.0774	8.57431	12.5493	13.5248	15.6023
HSm9JTBX	ibd	8.88239	11.3286	8.53248	12.604	13.6008	14.9993
MSM5CFCU	ibd	8.88091	10.695	8.13976	13.1841	13.483	15.368
MSM5CFCV	ibd	9.42069	11.3476	9.13909	12.8597	13.6535	15.5452
MSM5CFCW	ibd	9.30334	10.803	8.58767	12.6596	13.6989	15.3496
MSM5CFD6	ibd	8.83943	10.9032	8.5281	12.4067	13.3866	15.343
MSM5CFD7	ibd	8.51663	11.2842	8.53747	12.7455	13.7802	15.5483
MSM5LWJ3	ibd	8.96634	10.148	8.57766	12.3854	13.4067	15.127
MSM5LWJ4	ibd	8.95492	11.1269	8.27907	12.7695	13.2969	15.1449
MSM5LWJG	ibd	8.91594	10.5751	8.38625	12.7511	13.2745	15.3721
MSM5LWJH	ibd	8.63025	11.4426	8.74588	12.4504	13.7173	15.1069
MSM5LWJZ	ibd	9.06414	11.1905	8.34686	13.5459	13.8572	15.5861
MSM5LWKD	ibd	9.10413	9.82276	8.46656	12.7941	13.9029	15.3787
MSM5LWKE	ibd	9.0032	11.382	8.4739	12.8884	13.8497	15.3932
MSM5LWKQ	ibd	9.14659	11.0452	8.71658	12.3898	13.7101	15.0635
MSM5LWKR	ibd	9.11466	10.8821	8.76959	12.5262	13.8572	15.2292
MSM5LWKW	ibd	9.18416	11.2557	8.49914	13.4396	13.7833	15.7969
MSM5LWKX	ibd	8.89608	11.3506	8.80415	12.5354	13.5341	15.1779
MSM5LWL1	ibd	8.76747	10.4071	8.38453	12.9847	13.6803	15.2908
MSM5LWL2	ibd	8.9858	10.5277	8.36984	12.8055	13.8336	15.4275
MSM5LWL3	ibd	9.38202	11.4026	8.71293	12.4101	13.4886	15.1965
MSM5LWL4	ibd	9.0165	11.1279	8.26089	12.9144	13.4696	15.0949
MSM5LWL5	ibd	9.1272	11.1592	8.68825	13.1631	13.5308	15.5819
MSM5LWL6	ibd	9.21187	11.0436	9.11287	12.3742	13.6761	15.2558
MSM5LWL7	ibd	8.92701	11.2768	8.76401	12.4254	13.6646	15.2453
MSM719MD	ibd	8.95077	10.7687	8.45572	12.9862	14.2154	15.5492
MSM719MJ	ibd	8.83972	10.5559	8.5303	12.545	13.7377	15.5173
MSM719MS	ibd	8.80807	11.2274	8.3703	12.9133	13.6182	15.3948
MSM719MT	ibd	8.92608	10.6716	8.5499	12.7638	13.8647	15.4066
MSM719MZ	ibd	8.82541	10.0262	8.29471	13.0461	13.7289	15.4588
MSM719N1	ibd	9.00813	10.6709	8.74626	12.4766	13.6396	15.4435
MSM719N4	ibd	9.03188	10.7816	8.55886	12.4321	13.7146	15.2224
MSM719N5	ibd	8.9159	11.3965	8.59358	12.4696	13.6163	14.9634
MSMAKNES	ibd	9.13559	10.3029	8.01429	13.6134	13.4221	15.2519
MSMAKNET	ibd	9.39918	11.2599	8.22858	13.3656	13.7088	15.6333
PSM6XBZC	ibd	9.07302	11.6472	8.3664	12.8628	13.7812	15.2262
PSM6XBZD	ibd	8.76698	10.1722	8.45536	12.7478	13.9887	15.3045
PSM6XBZI	ibd	9.04203	10.5504	8.23249	13.1775	13.7305	15.3167
PSM6XBZJ	ibd	9.16424	10.9937	8.45287	12.9211	13.1635	14.8724
PSM6XBZO	ibd	8.80945	10.5957	8.30995	12.8539	13.4936	15.2385
PSM6XBZP	ibd	9.30723	11.3428	8.79655	12.3889	13.5468	15.1371
PSM6XBZQ	ibd	8.88562	10.6228	8.35033	13.0677	13.8691	15.3465
PSM6XBZR	ibd	9.03904	11.2353	8.80331	12.4513	13.9579	15.2677
PSM6XBZY	ibd	8.89938	10.7956	8.58387	12.978	13.4118	15.4345
PSM6XBZZ	ibd	8.89359	11.6955	8.34009	12.9433	13.3112	15.5609
PSM6XC11	ibd	8.91874	10.7705	8.83967	12.3196	13.2435	15.245
PSM6XC15	ibd	9.18189	10.7662	8.43895	13.2803	13.5552	15.5656
PSM7J4EU	ibd	8.85517	10.4508	8.41861	12.7647	13.1357	15.2321
PSM7J4EV	ibd	9.11218	10.8618	8.61987	12.4238	13.5544	15.3273
PSM7J4EW	ibd	8.69619	10.4189	8.16346	12.8877	13.5037	15.2726
PSM7J4EX	ibd	8.95518	10.6425	8.64908	12.4014	13.5031	15.2888
PSM7J4F3	ibd	8.85185	11.521	8.57031	12.6081	13.7144	15.3523
PSM7J4F4	ibd	8.81059	9.16289	8.48158	12.4977	13.4339	15.3116
PSM7J4FL	ibd	9.19455	11.3136	8.67517	13.7278	14.0123	16.1455
